# Supplementary material for: Novel Functional Genes Involved in Transdifferentiation of Canine ADMSCs Into Insulin-Producing Cells, as Determined by Absolute Quantitative Transcriptome Sequencing Analysis
Source: Frontiers journal article supplement (doi:10.3389/fcell.2021.685494), 2021-06-28
Supplement: Data_Sheet_1.zip [file Data_Sheet_1.zip]

## Sheet: Sheet1
GO_ID	GO_Term	GO_function	GO_class	Genes	S gene number	TS gene number	B gene number	TB gene number	pvalue	padj(BH)
GO:0016021	integral component of membrane	cellular_component	6	A3GALT2;A4GALT;AADAC;AATK;ABCA12;ABCA2;ABCA3;ABCA5;ABCA6;ABCA7;ABCA8;ABCA9;ABCB10;ABCB11;ABCB1;ABCB4;ABCB6;ABCB7;ABCB8;ABCC10;ABCC1;ABCC4;ABCC5;ABCC6;ABCC8;ABCD2;ABCD3;ABCD4;ABCG1;ABCG2;ABCG4;ABHD13;ABHD14A;ABHD16A;ABHD1;ABHD3;ACBD3;ACBD4;ACBD5;ACE2;ACE;ACKR3;ACKR4;ACP2;ACPP;ACSL1;ACSL3;ACSL4;ACSL5;ACSL6;ACVR2A;ACVR2B;ADAM10;ADAM11;ADAM15;ADAM19;ADAM22;ADAM23;ADAM28;ADAM33;ADAM9;ADCK5;ADCY2;ADCY3…	2468	13536	3558	18107	1	1
GO:0005737	cytoplasm	cellular_component	7	A1CF;AAAS;AAGAB;AAK1;AAMP;ABCB4;ABHD14A;ABHD14B;ABHD5;ABI1;ABI2;ABRAXAS2;ABTB1;ACAT2;ACE;ACIN1;ACLY;ACOT7;ACSS2;ACTG2;ACTR1A;ACTR1B;ACTR5;ACVR2A;ACVR2B;ACY1;ADAM17;ADAP1;ADARB1;ADAR;ADCY2;ADCY4;ADGB;ADGRV1;ADI1;ADRA2A;ADSS;AFAP1L1;AFAP1L2;AFDN;AFF3;AFTPH;AGAP1;AGL;AGRN;AHNAK2;AHR;AHSA1;AIDA;AIPL1;AK1;AK5;AKAP12;AKAP13;AKAP3;AKAP8L;AKNAD1;AKT1S1;AKTIP;ALDH1A2;ALDH1A3;ALYREF;ANAPC10;ANAPC16;ANGEL2;…	2414	13536	3011	18107	1.18405e-14	2.46835e-11
GO:0005634	nucleus	cellular_component	9	AARSD1;ABCC6;ABCG2;ABHD5;ACACB;ACAD11;ACAD9;ACADS;ACO2;ACOT13;ACPP;ACTN4;ACTR6;ADAM10;ADAP1;ADCY10;ADI1;ADNP;AFAP1L1;AGAP1;AGBL5;TRNAA-AGC;AGL;AGO2;AHNAK2;AHNAK;AIF1;AIFM1;AIMP2;AIPL1;AJUBA;AKAP3;AKAP7;AKIRIN2;AKT1;AKT2;ALAD;ALB;ALG2;ALKBH5;ALOX15B;ALX3;ALX4;AMDHD2;AMER1;AMMECR1;ANGEL1;ANKLE1;ANKRA2;ANKRD11;ANKRD17;ANKRD23;ANKRD34B;ANKRD37;ANKRD54;ANKRD6;ANKS1B;ANP32A;ANP32B;ANP32E;AP5S1;APBB1;AP…	2176	13536	2798	18107	3.02838e-05	0.0077304
GO:0070062	extracellular exosome	cellular_component	7	A4GALT;AARS;AASDHPPT;ABAT;ABCB11;ABCB1;ABCB4;ABCB6;ABHD14A;ABHD14B;ABHD6;ABHD8;ABI1;ACAA2;ACACA;ACADSB;ACAT2;ACLY;ACO1;ACOT13;ACOT7;ACP2;ACP5;ACPP;ACSL4;ACTA2;ACTN1;ACTN2;ACTN4;ACTR1A;ACTR1B;ACTR2;ACTR3B;ACTR3;ACVR1B;ADAM10;ADAM15;ADAMTS3;ADGRE5;ADGRG1;ADGRG2;ADGRV1;ADSS;AEBP1;AGA;AGRN;AGT;AHCY;AHNAK;AHSA1;AIF1L;AK1;AK2;AKR1A1;AKR1E2;AKR7A2;ALAD;ALB;ALCAM;ALDH16A1;ALDH1A3;ALDH1L2;ALDH3A2;ALDH6A1;…	1744	13536	2081	18107	4.23916e-26	2.65117e-22
GO:0005654	nucleoplasm	cellular_component	11	A1CF;AAAS;AAGAB;ABCF1;ABCG1;ABL1;ABTB2;ACBD5;ACLY;ACOT7;ACOX1;ACSS2;ADARB1;ADAR;ADD3;ADK;ADPRHL2;AEN;AFF3;AFF4;AFTPH;AGTRAP;AHR;AIP;AK6;TAF9;AKAP8L;AKAP8;AKIRIN1;AKT3;ALAS1;ALDH6A1;ALKBH2;ALKBH5;ALKBH8;ALPK2;ALX1;ANKRD11;ANKRD12;ANKRD23;ANKRD28;ANKS1A;ANLN;ANXA11;ANXA13;ANXA1;AP3D1;AP5Z1;API5;APLF;APRT;APTX;ARFGEF1;ARGLU1;ARHGAP27;ARHGAP28;ARHGEF5;ARID1A;ARID1B;ARID2;ARID3A;ARID3B;ARID5A;ARL4A;AR…	1269	13536	1410	18107	9.87825e-51	1.23557e-46
GO:0005886	plasma membrane	cellular_component	5	AAMP;ABCA12;ABCA3;ABCB6;ABCC6;ABCC9;ABCG1;ABCG2;ABCG4;ABR;ABTB1;ACE;ACIN1;ACKR3;ACLY;ACOX1;ACPP;ACTB;ACTG1;ACTL6A;ACTN2;ADAM28;ADAP1;ADCY2;ADCY3;ADCY4;ADCY5;ADCY6;ADCY7;ADD3;ADGRB3;ADGRD1;ADIPOR2;ADORA2A;ADORA2B;ADRA1A;ADRA1B;ADSS;AFAP1L1;AGPAT3;AGRN;AGTR1;AGTRAP;AHNAK2;AIP;AJUBA;AK1;AKAP10;AKAP12;AKAP5;AKT1;AKT3;AKTIP;ALOX15B;ALPL;AMER1;AMER2;ANGPT1;ANK1;ANKRD11;ANKRD13A;ANKRD13D;ANKRD27;ANKS1B;…	1142	13536	1611	18107	0.999902	1
GO:0005524	ATP binding	molecular_function	9	AAK1;AARS2;AARSD1;AARS;AATK;ABCA12;ABCA1;ABCA2;ABCA3;ABCA5;ABCA6;ABCA7;ABCA8;ABCA9;ABCB10;ABCB11;ABCB1;ABCB4;ABCB6;ABCB7;ABCB8;ABCB9;ABCC10;ABCC1;ABCC3;ABCC4;ABCC5;ABCC6;ABCC8;ABCC9;ABCD1;ABCD2;ABCD3;ABCD4;ABCE1;ABCF1;ABCF2;LOC106559817;ABCF3;ABCG1;ABCG2;ABCG4;ABL1;ABL2;ACACA;ACACB;ACLY;ACSS1;ACSS3;ACTA1;ACTA2;ACTR1A;ACTR1B;ACTR2;ACTR3B;ACTR3;ACVR1B;ACVR1;ACVR2A;ACVR2B;ACVRL1;ADCK1;AFG3L2;AK1;AK2…	1070	13536	1322	18107	2.02601e-08	1.40785e-05
GO:0005829	cytosol	cellular_component	9	AARS2;AARS;ABCA12;ABHD10;ABHD14B;ABHD5;ABI2;ABL1;ABR;ACACA;ACO1;ACOT6;ACOT7;ACTR2;ADA2;ADAL;ADA;ADCY5;ADGRL1;ADK;AFTPH;AGAP1;AGBL4;AGBL5;TRNAA-AGC;AGO2;AGTR1;AHCYL2;AHCY;AHNAK;AIF1;AIFM1;AIFM2;AIMP2;AIP;AJUBA;AKAP7;AKR1A1;AKT1;AKTIP;ALAD;ALKBH8;ALOX15B;ALOX15;ALOX5AP;ALOX5;ALS2;AMBRA1;AMD1;AMDHD1;ANGEL1;ANKFY1;ANKRA2;ANKRD1;ANKRD23;ANKRD27;ANKRD28;ANKRD2;ANKS1B;ANXA7;ANXA9;AP1AR;AP1G1;AP2A1;AP2B1…	1013	13536	1166	18107	6.3765e-26	2.65858e-22
GO:0046872	metal ion binding	molecular_function	6	ACACA;ACACB;ACE2;ACE;ACLY;ACVR1;ACVR2A;ACVR2B;ACY1;ADHFE1;ADNP;AEBP2;AGAP1;AGO2;ALKBH5;AMDHD1;ANGPT2;ANKFY1;ANKMY2;ANKZF1;ANTXR1;ANTXR2;APEX1;APTX;ARAF;ARG1;ARG2;ARHGAP29;ARHGAP45;ARHGEF18;ARHGEF28;ARID2;ARMC1;ARSG;ARSK;ASH2L;ASNA1;ASPA;ASTN2;ATF2;ATF7;ATMIN;ATP13A1;ATP13A2;ATP13A3;ATP1A1;ATP1A3;ATP2A2;ATP2A3;ATP2B1;ATP2B4;ATP2C2;BCL6B;BCL6;BNC1;BNC2;BRCC3;BSN;CACNA2D2;CADPS;CARNS1;CAT;CBFA2T2;CC…	873	13536	1203	18107	0.966406	1
GO:0008270	zinc ion binding	molecular_function	8	AARS2;AARS;ABLIM1;ABLIM2;ABLIM3;ADA2;ADAM10;ADAM11;ADAM15;ADAM17;ADAM19;ADAM22;ADAM23;ADAM28;ADAM33;ADAM9;ADAMTS10;ADAMTS12;ADAMTS14;ADAMTS15;ADAMTS16;ADAMTS17;ADAMTS19;ADAMTS1;ADAMTS2;ADAMTS3;ADAMTS4;ADAMTS5;ADAMTS6;ADAMTS7;ADAMTS8;ADAMTS9;ADAMTSL1;ADAMTSL3;ADAMTSL5;ADAT2;ADAT3;ADA;ADH4;ADH5;AEBP1;AFG3L2;AGBL2;AGBL3;AGBL4;AGBL5;TRNAA-AGC;AGTPBP1;AJUBA;ALAD;ALKBH8;AMFR;NUDT21;AMZ2;ANKIB1;APEX2;AP…	836	13536	1072	18107	0.0061706	0.349239
GO:0016020	membrane	cellular_component	3	AARS;ABCE1;ABCF1;ABCF2;LOC106559817;ABCF3;ABHD15;ABHD17A;ABHD17B;ABR;ACAP1;ACAP2;ACBD3;ACOX3;ACSL4;ACTR1B;ACTR2;ACTR3;ADAR;ADCY10;ADD2;ADPGK;AGAP1;AGAP3;AGFG2;AGK;AGO2;AGO3;AIMP2;AK6;TAF9;AKAP13;AKAP2;AKAP8;AKNA;ALDH16A1;ALG2;AMER2;ANKRA2;ANKRD17;ANKS1B;ANPEP;ANXA11;AP2A1;AP2B1;API5;APMAP;AQR;ARFRP1;ARHGAP45;ARHGDIG;ARL6;ARL8B;ARPC3;ASCC3;ASIC2;ASPHD2;ASTN2;ATIC;ATP2B1;ATP5O;ATP6V0E2;ATP6V1D;ATP6…	798	13536	933	18107	1.42916e-16	4.46898e-13
GO:0005739	mitochondrion	cellular_component	9	AADAT;AARS2;AARS;AASS;ABAT;ABCB8;ABCD1;ABCE1;ABCF2;LOC106559817;ABCG1;ABHD10;ABHD11;ABHD6;ACACA;ACACB;ACAD11;ACAD8;ACAD9;ACADL;ACADM;ACADSB;ACADS;ACADVL;ACBD3;ACO1;ACO2;ACOT13;ACOT7;ACOT9;ACOX1;ACOX2;ACOX3;ACP6;ACSF2;ACSF3;ACSL1;ACSL4;ACSL6;ACSS3;ACYP2;ADCK1;ADHFE1;ADO;ADPRHL2;AGAP2;AGK;AGPAT5;AGPS;AGR2;AKAP10;AKAP1;AKR7A2;AKT1;ALDH18A1;ALDH1L2;ALDH5A1;ALDH6A1;ALDH7A1;ALDOC;ALKBH1;AMACR;AMBRA1;AM…	760	13536	896	18107	4.99153e-14	8.91915e-11
GO:0005515	protein binding	molecular_function	4	ACBD3;ACOT7;ACTR2;ADCK5;ADGRB3;AFF4;AHCYL2;AHNAK2;AIG1;AIMP2;ALG13;AMER2;ANKRD28;ANKRD42;ANKRD44;ANKRD45;ANKRD52;ANKS1B;ANTXR1;AP2A1;AP2B1;AQP5;ARHGAP22;ARHGAP26;ARHGEF7;ARL2;ARMC2;ARMC8;ARMC9;ARMCX1;ARMCX5;ARPC2;ARPC3;ASF1A;ASH2L;ASIC1;SMARCD1;ASIC2;ASTN2;ATG101;ATP2A2;ATP2B1;ATP6V1D;ATXN3;ATXN7L1;ATXN7L3;AVPI1;BCAS3;BCL7A;BCL7B;BEGAIN;BICRA;BIN1;LOC111091071;BORCS5;BRAF;BRCC3;BRD8;BTF3L4;BUB3;C…	631	13536	781	18107	2.73951e-05	0.00713871
GO:0006355	regulation of transcription, DNA-templated	biological_process	11	ABCG1;ACTR5;ACVR1B;AFF4;ALX3;ANP32A;APBB1;APBB2;APBB3;ARHGAP22;ARID2;ARID5B;ARNTL;ASCC1;ASCC2;ASF1A;ASH2L;ATF7;AXIN2;BRCA2;BRD8;BRF1;BRF2;C18H11orf84;C6H7orf61;CAMTA1;CARHSP1;CARM1;CCAR1;CCDC152;CCDC59;CCNK;CDK8;CHD2;CHD3;CHD4;CHD5;CHFR;ZNF605;CHTOP;CIITA;CLOCK;CNBP;CNOT2;CNOT3;CNOT9;COMMD10;COMMD2;COMMD3;COMMD5;COMMD8;COMMD9;CPNE1;RBM12;CREB1;CREBBP;CREM;CRY1;MTERF2;CSDC2;CSDE1;CSNK2A1;CSNK2A2;C…	620	13536	865	18107	0.984445	1
GO:0005622	intracellular	cellular_component	5	ABR;ADAM15;ADCY3;ADCY6;ADCY7;ADCY9;ADCYAP1;ADGRG1;AGAP1;AGAP3;AKT1;AKT2;AKT3;ALMS1;ANK1;ANKRD50;ANO10;ANO5;ANO8;ANXA5;ARHGAP29;ARHGAP31;ARHGAP45;ARHGEF28;ARHGEF3;ARHGEF4;ARHGEF6;ARHGEF7;ARL10;ARL13B;ARL15;ARL16;ARL2;ARL5A;ARL5B;ARL9;ASB11;ASB13;ASB15;ASB3;ASB5;ASB6;ASB7;ASB8;ASB9;ATP1B1;BCAR3;BRCC3;BSPRY;C10H2orf15;LIPT1;C35H6orf62;CAB39;CAMK1;CAPN3;CCDC68;CCDC93;CCL2;CD40LG;CDC25B;CDC42BPA;CDC42…	592	13536	802	18107	0.749188	0.92626
GO:0045944	positive regulation of transcription by RNA polymerase II	biological_process	13	AAMDC;ABHD14B;ABLIM3;ACVR1;ACVR2A;ACVRL1;ADCYAP1;AGAP2;AGO2;AHRR;AHR;AK6;TAF9;AKIRIN2;AKNA;AKT1;ALX1;ALX4;ANKRD1;APP;ARF4;ARHGEF2;ARID3A;ARID3B;ARID4A;ARID4B;ARMCX3;ARNT2;ARNTL2;ARNTL;ARRB1;ASH2L;ASXL1;ASXL2;ATAD2B;ATAD2;ATF1;ATF2;ATF5;ATRX;ATXN7;AUTS2;BACH1;BARX1;BCAS3;BCL2L12;BCL3;BCL9L;BCL9;BHLHA15;BMP4;BMP6;BMP7;BMPR1A;BMPR2;BRCA1;CALCOCO1;CAMK1;CAMTA1;CAMTA2;CAPRIN2;CASK;CBFA2T2;CBFB;CCDC62;…	567	13536	709	18107	0.000504027	0.0716406
GO:0005615	extracellular space	cellular_component	5	ABCA3;ABI3BP;ACHE;ACPP;ACTA2;ACTN1;ACTN4;ADA2;ADAMTS15;ADAMTS3;ADAMTS4;ADAMTS5;ADAMTS9;AEBP1;AFM;AGA;AGR2;AGT;AIFM2;AKR1A1;ALOX5;ANGPT1;ANGPT2;ANGPT4;ANGPTL1;ANGPTL3;ANXA13;ANXA1;APLN;APOD;APP;ARSG;ASAH1;ATRN;ATXN10;AZGP1;B2M;B4GALT1;BIVM;BLOC1S1;BMP1;BMP2;BMP3;BMP4;BMP6;BMP7;BMPER;BMPR2;BPI;BTD;C10H2orf40;C11H9orf72;C1QTNF1;C1QTNF2;C1QTNF6;C1QTNF7;C1RL;C23H3orf33;C23H3orf58;C37H2orf88;C3;C4BPB;C…	537	13536	771	18107	0.999546	1
GO:0005730	nucleolus	cellular_component	11	AATF;ABCB8;ABHD14B;ABL1;ABT1;ABTB1;ACACA;ACADVL;ACAT2;ACIN1;ACOX1;ACSL5;ADARB1;ADAR;AEN;AGAP2;AGPS;AK6;TAF9;AKTIP;ANKRD1;APTX;ARFGEF1;ARID3A;ARID5A;ARL4A;ARNTL2;ASNA1;ATF3;ATXN1L;BCAR1;BCAS3;BCL9L;BCLAF1;BEND3;BHLHE40;BMS1;BRIX1;BRWD1;BTBD10;BYSL;C1D;C20H19orf53;MRI1;CAMK4;CAMTA1;CAPG;CASK;CBX5;CCDC106;CCDC137;CCDC86;CCND2;CCT5;CD2AP;CDC14B;CDC5L;CDCA7L;CDCA8;CDK12;CDK4;CDK8;CDKN2AIPNL;CDV3;CEBPA…	517	13536	607	18107	1.61724e-10	1.83895e-07
GO:0003677	DNA binding	molecular_function	6	ABCF2;LOC106559817;ADNP;AHDC1;AIFM1;AIFM2;AKAP8L;AKAP8;AKAP9;ALB;ANKRD1;ANKRD33B;APEX1;APEX2;APP;ARHGAP35;ARID1A;ARID1B;ARID2;ARID4B;ARID5B;ARNTL;ASH1L;ASH2L;ASXL1;ASXL2;BANF1;BAZ2A;BAZ2B;BCL3;BCLAF1;BDP1;BLM;BNC2;BRCA1;BRIP1;C1D;C5H17orf49;CAMTA1;CARHSP1;CASP8AP2;CCDC152;CDC5L;CDT1;CEBPB;CENPA;CENPBD1;CENPT;CENPW;CERS2;CERS4;CERS5;CERS6;CHD3;CHD4;CHD5;CHD8;CHRAC1;CLOCK;CNBP;COR52H8;CSDC2;CSDE1;C…	513	13536	774	18107	1	1
GO:0003676	nucleic acid binding	molecular_function	5	AEN;AGGF1;BCL6;C18H11orf95;CASZ1;CELF1;CELF2;CELF3;CELF4;CHAMP1;CHD1L;CHD6;CHFR;ZNF605;CIZ1;CMTR1;CNBP;CNOT8;CPEB1;CPEB2;CPEB3;CPEB4;CPNE1;RBM12;CPSF4;CREB5;CRY1;MTERF2;CTCF;DARS2;DBF4B;DBF4;DDX19A;DDX19B;DDX20;DDX25;DDX39B;DDX46;DDX52;DDX59;DDX60;DHX29;DNAJC17;EEF1AKMT1;EIF4A2;ELAVL4;ENDOG;ENOX1;ENOX2;ENPP1;ENPP2;ERI1;ERI2;EWSR1;EXD1;EXD2;EXD3;FIZ1;GIN1;GLI3;GLI4;GLIS3;GPANK1;GPATCH11;GPATCH1;GP…	466	13536	575	18107	0.000174987	0.031039
GO:0005887	integral component of plasma membrane	cellular_component	7	ABCA1;ABCC3;ACKR2;ACVRL1;ADAM17;ADGRL3;ADRA1A;ADRA2A;ADRA2B;ADRB2;ANKH;APCDD1;APH1A;AQP10;AQP1;AQP4;AQP5;AQP8;AQP9;ASIC1;SMARCD1;ASIC2;ATP13A1;ATP13A2;ATP13A3;ATP1A3;ATP2A1;ATP2A2;ATP2A3;ATP2B1;ATP2B4;ATP2C1;ATP7A;ATP7B;BCAP31;BMPR2;BOC;C1QTNF1;CADM1;CADM2;CADM3;CADM4;CALHM2;CALHM5;CALHM6;CALY;CAPN1;LOC612044;CAPRIN1;CAV1;CAV2;CD151;CD180;CD200;CD37;CD47;CD53;CD55;CD63;CD72;CD81;CD82;CD9;CDON;CEL…	453	13536	795	18107	1	1
GO:0005794	Golgi apparatus	cellular_component	9	A3GALT2;ABCA1;ABCA7;ABCB6;ABCG1;ACBD3;ACO1;ACSL3;ACTL7A;ADAM19;AGBL4;AKT3;AKTIP;ALB;ALX1;ANGPTL3;AP1AR;AP1G1;AP1S2;AP3B1;AP3S1;APC2;APH1A;APOB;APOE;APP;ARAP1;ARF1;ARF3;ARF4;ARFGAP2;ARHGAP21;ARID3A;ARL17A;ARL1;ARL3;ARPC2;ARV1;ASCC3;ATF6;ATP1A3;ATP6V0A1;ATP8B1;ATP8B2;ATP8B4;AXIN2;B2M;B3GAT3;B4GALT1;B4GALT3;B4GALT7;B4GAT1;BACE1;BACE2;BCL9;BHLHE40;BICD2;BLZF1;BST2;CAND1;CAPN2;CASC4;CCDC88A;CCDC91;CCN…	450	13536	508	18107	2.79675e-15	6.99635e-12
GO:0000122	negative regulation of transcription by RNA polymerase II	biological_process	12	ACVR2B;AEBP1;AEBP2;AHRR;AJUBA;ALX1;ANKRD2;ARID1A;ASCL2;ASCL3;ASXL1;ATF3;ATF7IP;ATN1;ATXN1L;AURKB;TRNAD-GUC;BACH1;BACH2;BCL6B;BCL6;BCOR;BEND3;BEND6;BHLHE40;BHLHE41;BMP2;BMP4;BMP6;BPTF;BRMS1L;BRMS1;C1QBP;CALR;CAV1;CBX2;CBX4;CBX7;CBX8;CC2D1A;CC2D1B;CCND1;CD36;CDC73;CDK2;CDX2;CEBPA;CELA1;CGGBP1;CHCHD3;CHD8;CIC;CNBP;COQ7;CPEB3;CREBRF;CRY1;MTERF2;CRYM;CTBP1;CTBP2;CTNNB1;CTR9;CUL3;CUX2;CXXC5;DAB2IP;DACH…	437	13536	539	18107	0.000257307	0.0434918
GO:0005509	calcium ion binding	molecular_function	7	ACTN1;ACTN2;ACTN4;ADGRE1;ADGRE5;ADGRL3;ADGRL4;ADGRV1;AGRN;AIF1L;AIF1;ALOX15B;ANXA11;ANXA13;ANXA1;ANXA2;ANXA3;ANXA4;ANXA5;ANXA6;ANXA7;ANXA8L1;ANXA9;ASPH;ASPN;ASTN2;ATP2A1;ATP2A2;ATP2C1;BMP1;BRAF;C1R;C1S;C2CD4A;C2CD5;CABCOCO1;LOC111095458;CABP7;CABYR;CACNA1B;CADPS;CALB1;CALM1;CALM2;CALM3;CALML4;CALML6;CALR3;CALR;CALU;CAMKK2;CANT1;CANX;CAPN1;LOC612044;CAPN2;CAPN3;CAPNS1;CAPNS2;CAPS;CASQ1;CBLB;CBLC;C…	434	13536	595	18107	0.860553	0.99258
GO:0005783	endoplasmic reticulum	cellular_component	9	ABCB6;ACO1;ACSL3;ACSL5;ADPGK;AGA;AGMO;AGPAT2;AGPAT3;AGR2;AHCYL2;ALB;ALDH3A2;ALG12;ALG1;ALG2;ALG3;ALG9;ALOX5AP;ANGEL1;ANKLE2;ANKRD13C;ANP32A;ANP32B;APH1A;APMAP;APOB;APOC1;APOD;APOE;AQP5;ARCN1;ARHGAP5;ARL6IP5;ARSG;ASNA1;ATL1;ATL2;ATL3;ATP10A;ATP10D;ATP11A;ATP1A3;ATP8A1;ATP8B1;B3GALNT2;BAK1;BCAP29;BCHE;BNIP1;BNIP3L;BNIP3;BRSK2;C1H19orf12;CALCRL;CALR3;CALU;CAMLG;CAST;CATSPER3;CCDC3;CCDC47;CCDC88A;CD3…	430	13536	584	18107	0.754522	0.929993
GO:0042803	protein homodimerization activity	molecular_function	6	AADAT;ABAT;ABCB10;ABCB9;ABCD1;ABCD2;ABCD3;ABCG1;ABCG2;ABCG4;ACOT7;ACTN1;ACTN2;ACTN4;ACVR1;ADA2;ADAM10;ADD2;ADRA2A;ADRB2;AGR2;ALDH1A3;ALOX5AP;ALS2;AMFR;NUDT21;ANXA6;APOE;ARID3A;ASNSD1;LOC478838;ASNS;ATF3;ATG7;ATIC;ATP2A1;B4GALT1;BAK1;BARD1;BAX;BCL2A1;BCL2L1;BCL2L2;BHLHA15;BHLHB9;BHLHE40;BHLHE41;BIRC5;BLOC1S6;BMPR1A;BNIP3;BST2;C15H16orf87;C1QB;CACYBP;CADM1;CADM2;CADM3;CADM4;CALCOCO2;CAMK2A;CAMK2D;C…	418	13536	504	18107	5.35998e-06	0.0019155
GO:0055114	oxidation-reduction process	biological_process	5	AAED1;AASS;ADHFE1;ADI1;ADO;AGMO;AGPS;AIFM1;AIFM2;AKR1A1;AKR1B1;AKR1E2;ALDH16A1;ALDH18A1;ALDH1A1;ALDH1A2;ALDH1A3;ALDH1L2;ALDH2;ALDH3A2;ALDH3B1;ALDH4A1;ALDH6A1;ALDH7A1;ALDH9A1;ALKBH4;ALKBH8;ALOX15B;ALOX15;ALOX5AP;ALOX5;ALOXE3;AOC2;AOC3;BBOX1;BCKDHA;BCKDHB;BCO2;BDH1;BLVRA;BLVRB;BMP2;CAT;CBR3;CBR4;CCS;CDO1;CFAP61;CH25H;CHCHD4;CHDH;CHML;OPN3;CHM;COQ6;COQ7;CPOX;CP;CREG1;CREG2;CRYL1;CRYZL1;CRYZ;CTBP1;CT…	417	13536	530	18107	0.0184118	0.677337
GO:0003700	DNA binding transcription factor activity	molecular_function	4	AFF4;ARNTL;ASCL2;ASCL3;ATF3;ATF6B;ATF6;ATF7;ATOH8;BACH1;BACH2;BCL3;BRD8;C6H7orf61;CBFA2T2;CBFA2T3;CDX2;CEBPB;CHFR;ZNF605;CIR1;CITED2;CLOCK;CNBP;CREB1;CREB3L1;CREB5;CREBL2;CREBRF;CREBZF;CREM;CTBP1;CTNNB1;DNMT3B;E2F1;E2F2;E2F3;E2F5;E2F6;EBF1;ELMSAN1;ETS1;ETV1;ETV4;ETV7;FOXN2;FOXN3;FOXP1;FOXP2;GABPB1;GAS7;GATAD1;GATAD2A;GATAD2B;GLI3;GLI4;GPBP1L1;GPBP1;GRHL1;GRHL2;GRHL3;GTF2H3;HEY1;HIC1;HIVEP2;HIVEP3…	415	13536	515	18107	0.000929123	0.10565
GO:0006351	transcription, DNA-templated	biological_process	10	ABLIM2;ABLIM3;AGO2;AJUBA;ANP32A;ARHGAP22;ARHGAP35;ARNTL2;ARNTL;ASCC2;ASCL2;ASF1A;ASH2L;ASXL1;ASXL2;ATXN7L3;BCAS3;BCL3;BEND6;BHLHE40;BIRC5;BPTF;BRCA1;BRD2;BRD8;BRMS1L;C18H11orf84;CALCOCO1;CAMTA1;CASZ1;CCDC59;CCNH;CCNT1;CCNT2;CDK8;CEBPB;CHTOP;CIR1;CNBP;CNOT7;CNOT8;CNOT9;COMMD10;COMMD2;COMMD3;COMMD5;COMMD8;COMMD9;CPNE1;RBM12;CREBL2;CREM;CSNK2A1;CSNK2A2;CTNNB1;CUX2;DIDO1;DR1;DYNLL1;E2F1;E2F2;E2F3;E2F…	346	13536	406	18107	1.55879e-07	8.12389e-05
GO:0043547	positive regulation of GTPase activity	biological_process	15	ABR;ACAP1;ACAP2;ACAP3;ADAP1;ADCYAP1;ADGRB3;AGAP1;AGAP2;AGAP3;AGFG1;AGFG2;AKAP13;ALS2;AMPH;ANKRD27;ARAP1;ARAP2;ARAP3;ARFGAP1;ARFGAP2;ARFGAP3;ARFGEF1;ARFGEF2;ARFGEF3;ARHGAP10;ARHGAP18;ARHGAP1;ARHGAP22;ARHGAP23;ARHGAP24;ARHGAP26;ARHGAP31;ARHGAP35;ARHGAP42;ARHGAP4;ARHGAP6;ARHGEF10L;ARHGEF11;ARHGEF12;ARHGEF15;ARHGEF16;ARHGEF17;ARHGEF18;ARHGEF19;ARHGEF1;ARHGEF25;ARHGEF26;ARHGEF28;ARHGEF2;ARHGEF33;ARHGE…	339	13536	400	18107	6.85101e-07	0.000317379
GO:0003674	molecular_function	molecular_function	2	ABHD18;ABRACL;AMDHD1;AMMECR1L;ANAPC15;ANKRD16;ANKRD23;ANKRD29;ANKRD33B;ANKRD34A;ANKRD39;ANKRD40;ANKRD45;ANKRD52;ANKRD55;ARL14EPL;ARMCX2;ATXN7L2;AUTS2;BCL7A;BEND4;BICRAL;BLCAP;BOLA3;BORCS5;BORCS7;BSDC1;C10H12orf45;C10H12orf75;C10H22orf23;C12H6orf132;C13H8orf76;C17H2orf68;C18H11orf74;C18H11orf84;C18H11orf95;C18H11orf98;C18H7orf57;C19H2orf76;C1H19orf54;C1H9orf40;C1H9orf64;C1H9orf85;C20H19orf53;MRI1;…	335	13536	505	18107	0.999993	1
GO:0042802	identical protein binding	molecular_function	5	ABAT;ACPP;ADIPOR2;AHI1;AKT1;ALAD;ALDOB;ALS2CL;AMOTL1;AMOTL2;ANXA4;APIP;APLP2;APOA1;APOH;APPL1;APP;ASS1;ATF6;ATG101;ATG16L1;ATL1;ATL2;ATL3;B2M;BAG2;BAIAP2;BCHE;BIN1;LOC111091071;BNIP2;BRAF;BRAP;BRI3;C1QTNF2;C1QTNF6;C1S;C20H19orf53;MRI1;C28H10orf88;CAMK2D;CAMK2G;CASC3;CASP6;CASP8AP2;CASTOR1;CASTOR2;CAV1;CBLL1;CCDC91;CD247;CDC42BPA;CEP57L1;CEP72;CHAF1A;CLDN1;CLDN2;CLDN3;COIL;COL1A1;COL1A2;COL7A1;COR…	328	13536	371	18107	3.10032e-11	4.30876e-08
GO:0008150	biological_process	biological_process	2	ABHD18;ABRACL;AMMECR1L;ANKRD16;ANKRD29;ANKRD33B;ANKRD34A;ANKRD39;ANKRD40;ANKRD45;ANKRD52;ANKRD55;ARL14EPL;ARMCX2;ATXN7L2;AUTS2;BCL7B;BEND4;BICRAL;BLCAP;BOLA3;BORCS7;BSDC1;C10H12orf45;C10H12orf75;C10H22orf23;C12H6orf132;C13H8orf76;C14H1orf35;C17H2orf68;C18H11orf68;C18H11orf74;C18H11orf95;C18H11orf98;C18H7orf57;C19H2orf76;C1H19orf54;C1H9orf40;C1H9orf64;C1H9orf85;C20H19orf53;MRI1;C20H19orf71;C20H3or…	328	13536	492	18107	0.999981	1
GO:0005813	centrosome	cellular_component	9	AAAS;ACTR1A;ACTR1B;ACTR8;AHI1;ALS2;AMFR;NUDT21;ARHGEF10;ARL2BP;ARL2;ARL3;ATF5;ATP6V0D1;ATP6V1D;AUNIP;AXIN2;B9D1;B9D2;BBS1;BCL2L1;BICDL1;BLOC1S2;BOD1;BRCA2;BRSK1;BRSK2;C16H4orf47;C28H10orf90;CABCOCO1;LOC111095458;CALM3;CAMSAP2;CAMSAP3;CAPRIN2;CCDC141;CCDC14;CCDC15;CCDC187;CCDC28B;CCDC61;CCDC77;CCDC85B;CCDC8;CCNA2;BBS7;CCNB2;CCT4;CCT5;CDC14A;CDC16;CDC27;CDK1;CDK2;CDK5RAP3;CDK6;CDKL2;CEP112;CEP120;C…	315	13536	359	18107	6.06505e-10	5.83551e-07
GO:0005575	cellular_component	cellular_component	2	AAED1;ABHD18;ABRACL;AMMECR1L;ANKRD16;ANKRD29;ANKRD33B;ANKRD34A;ANKRD39;ANKRD40;ANKRD45;ANKRD52;ANKRD55;ARHGAP26;ARL14EPL;ARMCX2;ATXN7L2;AUTS2;BCL7A;BCL7B;BEND4;BICRAL;BSDC1;C10H12orf45;C10H12orf75;C10H22orf23;C12H6orf132;C13H8orf76;C14H1orf35;C17H2orf68;C18H11orf68;C18H11orf84;C18H11orf95;C18H11orf98;C18H7orf57;C19H2orf76;C1H19orf54;C1H9orf40;C1H9orf64;C1H9orf85;C20H19orf57;C20H19orf71;C20H3orf14…	315	13536	471	18107	0.999958	1
GO:0007165	signal transduction	biological_process	6	ABCC8;ABCC9;ABR;AFDN;AGAP1;AKAP12;AKAP5;AKAP9;ANGPTL3;ANK1;ANK2;ANK3;ANTXR1;APBB1IP;ARAP1;ARAP2;ARAP3;ARHGAP10;ARHGAP11A;ARHGAP12;ARHGAP17;ARHGAP19;ARHGAP20;ARHGAP21;ARHGAP22;ARHGAP23;ARHGAP24;ARHGAP25;ARHGAP26;ARHGAP27;ARHGAP28;ARHGAP30;ARHGAP32;ARHGAP33;ARHGAP39;ARHGAP42;ARHGAP44;ARHGAP4;ARHGAP6;ARHGAP8;ARHGAP9;ARHGEF39;SIT1;ARRB1;ARRB2;ARRDC2;ARRDC5;ATP2C1;BRD8;BST2;C7H18orf32;CAMK1;CANT1;CARD…	304	13536	391	18107	0.0923723	0.92626
GO:0048471	perinuclear region of cytoplasm	cellular_component	9	ABCA1;ABCD1;ABL1;ACKR3;ACSL3;ACTN4;ADCY10;AGGF1;AIF1;AKAP6;ALG2;AMFR;NUDT21;ANGEL1;ANKRD13C;ANP32A;ANP32B;ANXA4;ANXA6;APC2;APOD;APP;ARF3;ARFGEF1;ASPSCR1;ATP7A;ATP7B;ATXN10;ATXN2;AURKA;AXIN1;AZIN2;BAG5;BCL10;BICD1;BUB1B;CA4;CAD;ATRAID;CALCOCO2;CALR;CAMK2D;CAPN6;CAV1;CAV2;CCDC78;CD34;CDH13;CDH1;CDK2AP1;CDK5R1;CDK5RAP2;CDKN3;CHGA;CIB1;CLIC4;CLN5;CLU;COBL;COL4A3BP;CORO1B;CSF1;CSNK1D;CTIF;CTNNB1;CTSB;…	299	13536	337	18107	8.85857e-11	1.10803e-07
GO:0006468	protein phosphorylation	biological_process	8	AAK1;AATK;ADAM10;ADCK1;ADCK5;ADM2;AKAP13;AKT2;ALPK1;ALPK2;ALPK3;APP;ARAF;ATR;BCKDK;BIRC5;BMP2K;BRAF;BRSK1;BRSK2;BUB1;CAMK1D;CAMK1G;CAMK1;CAMK2A;CAMK2D;CAMK2G;CAMKK1;CASK;CCL8;CCND1;CCNE1;CCNT1;CDC42BPA;CDC42BPB;CDC42BPG;CDK10;CDK12;CDK13;CDK14;CLDN12;CDK15;CDK16;UBA1;CDK17;CDK18;CDK19;CDK20;CDK2;CDK4;CDK6;CDK7;CDK8;CDK9;CDKL2;CDKL3;CDKL5;CIT;CLK4;CNTD1;COQ8B;CPNE3;CREB1;CSNK1A1;CSNK1D;CSNK1E;CSNK…	281	13536	336	18107	5.30989e-05	0.0120757
GO:0005525	GTP binding	molecular_function	9	ADSS;AGAP1;AGAP2;AGAP3;AK4;ANXA6;ARF1;ARF3;ARF4;ARF5;ARF6;ARFRP1;ARHGAP35;ARHGAP5;ARL10;ARL13B;ARL15;ARL16;ARL17A;ARL1;ARL2;ARL3;ARL4A;ARL4C;ARL4D;ARL5A;ARL5B;ARL6;ARL8A;ARL8B;ARL9;ATL1;ATL2;ATL3;BMS1;CDC42;CRACR2A;DIRAS2;DNAJC27;DNM1L;DNM1;DNM2;DNM3;DRG1;DRG2;EEF1A1;EEF2;EEFSEC;EFL1;EFTUD2;EHD1;EHD2;EHD3;EHD4;EIF2B2;EIF2S3;EIF5B;ERAL1;FKBP4;LOC102155834;GBP1;GBP5;GCH1;GEM;GFM1;GFM2;GIMAP4;GIMAP8…	279	13536	329	18107	5.88684e-06	0.00204535
GO:0005925	focal adhesion	cellular_component	6	ACTB;ACTG1;ACTN1;ACTN2;ACTN4;ACTR2;ACTR3;ADAM10;ADAM17;ADGRE5;AFAP1;AHNAK;AIF1L;AJUBA;AKAP12;ALCAM;ANXA1;ANXA5;ANXA6;ARF1;ARF6;ARHGAP22;ARHGAP26;ARHGEF2;ARHGEF7;ARPC1B;ARPC2;ARPC3;ARPC5L;ARPC5;ASAP3;ATP6V0A2;ATP6V0C;B2M;BCAR1;BSG;CALR;CAPN1;LOC612044;CAPN2;CAPN5;CASK;CAV1;CAV2;CCND3;CD151;CD44;CD59;CD81;CD99;CD9;CDC42EP1;CDH13;CDH1;CDH2;CHP1;CLASP1;CLASP2;CNN3;CORO1B;CPNE3;CSRP1;CTNNA1;CTNNB1;CTT…	266	13536	293	18107	1.94249e-12	3.03708e-09
GO:0000166	nucleotide binding	molecular_function	5	A1CF;ABT1;ACIN1;ADCY2;ADCY3;ADCY4;ADCY5;ADCY6;ADCY7;ADCY9;AKAP17A;ALKBH8;ALYREF;APLF;ATP7A;BRAP;CAMK2G;CDK2;CDK8;CELF1;CELF2;CELF3;CELF4;CELF6;CHFR;ZNF605;CIRBP;CLK4;CNOT4;CPEB1;CPEB2;CPEB3;CPEB4;CPNE1;RBM12;CPSF6;CPSF7;CRCP;CSNK1G3;CSTF2;DAPK2;DAZAP1;DNAJC17;DND1;EIF3B;EIF4B;EIF4H;ELAVL1;ELAVL2;ELAVL4;ENOX1;ENOX2;ESRP1;ESRP2;EWSR1;EXOSC10;FHIT;FUS;G3BP2;GRSF1;GUCY1A2;GUCY1A3;HNRNPA0;HNRNPA1;HNRN…	256	13536	303	18107	2.52403e-05	0.00686317
GO:0006366	transcription by RNA polymerase II	biological_process	11	ABT1;AFF4;AHR;AKNA;ALX1;ALX4;ARID3A;ARID3B;ARNT2;ARNTL;ARRB1;ASH2L;ATF1;ATF2;BACH1;BACH2;BARX1;BHLHA15;BMPR2;CAMTA1;CAMTA2;CDK7;CEBPA;CEBPD;CEBPG;CEBPZ;CLOCK;CREB1;CREB3L2;CREB3L3;CREB3;CREB5;CSRNP1;CSRNP2;DBP;DDX21;DLX2;DVL1;DVL2;E2F4;EAF2;EBF1;EBF2;EBF3;EBF4;ECD;EGR1;EHF;ELF1;ELF3;ELF4;ELK1;ELK3;EP300;EPAS1;ERCC2;ESR1;ESRRA;ETS1;ETV1;ETV5;ETV6;FLI1;FOSB;FOS;FOXC2;FOXF1;FOXJ1;FOXJ2;FOXK2;FOXM1;F…	256	13536	327	18107	0.0762439	0.92626
GO:0035556	intracellular signal transduction	biological_process	7	ABR;ADCY10;ADCY3;ADCY5;ADCY6;ADCY9;AKAP13;AKAP6;AKT1;AKT2;AKT3;ARAF;ARFGEF2;ARHGAP29;ARHGAP45;ARHGEF12;ARHGEF28;ARHGEF2;ARHGEF3;ARHGEF4;ARHGEF5;ARHGEF6;ARHGEF7;ASB11;ASB13;ASB15;ASB3;ASB4;ASB5;ASB6;ASB7;ASB8;ASB9;BLNK;BMX;BRAF;BRSK1;BRSK2;CAB39;CAMK2G;CAMK4;CCDC68;CDC42BPA;CDC42BPB;CDC42BPG;CHN1;CHN2;CISH;CIT;CNTD1;CUX1;SH2B2;CXCL8;DAPK1;DAPK2;DAPK3;DCDC2;DCLK1;DCLK2;DEF8;DEPDC1B;DEPDC1;DEPDC5;DE…	250	13536	304	18107	0.00110722	0.116379
GO:0046982	protein heterodimerization activity	molecular_function	6	ABCF2;LOC106559817;ABCG1;ABCG4;ABTB2;ADCY5;ADD2;ADIPOR2;ADRA1A;AGTR1;AK6;TAF9;ALG2;ALOX5AP;ALX1;ALX4;ARNT2;ARNTL;ATF1;ATF3;ATF6;BAD;BAK1;BARD1;BAX;BCL2A1;BCL2L1;BCL2L2;BDKRB2;BHLHE40;BHLHE41;BMP2;BMP6;BNIP3;BRAF;BTBD11;CABYR;CAV1;CAV2;CD3D;CD3E;CD3G;CEBPG;CENPA;CENPS;CENPT;CHRAC1;CHUK;CLCF1;CLCN3;CREB3L3;CRLF1;CUL3;CYB5R1;ADIPOR1;CYBA;CYBB;DDIT3;DGKD;DLG2;DR1;DRAP1;DVL3;EGFR;EPAS1;ERBB2;EXT2;FLOT…	242	13536	327	18107	0.650896	0.92626
GO:0006508	proteolysis	biological_process	6	ACE2;ACE;ACY1;ADAM11;ADAM15;ADAM22;ADAM23;ADAM28;ADAM33;ADAM9;ADAMTS10;ADAMTS12;ADAMTS14;ADAMTS15;ADAMTS16;ADAMTS17;ADAMTS19;ADAMTS1;ADAMTS4;ADAMTS5;ADAMTS6;ADAMTS8;ADAMTS9;ADAMTSL1;ADAMTSL3;ADAMTSL4;ADAMTSL5;ADGB;AGBL2;AGBL3;AGBL4;AGBL5;TRNAA-AGC;AGTPBP1;ALG13;AMZ2;ANPEP;APEH;ASRGL1;ATXN3;BLMH;BMP1;BRCC3;C1RL;C1R;C1S;C2;CAPN10;CAPN15;CAPN1;LOC612044;CAPN2;CAPN3;CAPN5;CAPN6;CAPN7;CAPNS1;CAPNS2;CA…	241	13536	346	18107	0.987184	1
GO:0003682	chromatin binding	molecular_function	4	AJUBA;ANKRD17;ANKRD2;APBB1;APTX;ARID3A;ASH1L;ASIC1;SMARCD1;ATAD2B;ATAD2;ATF2;ATF5;ATRX;ATXN7;AUTS2;BAHCC1;BAHD1;BAZ1B;BCAS3;BEND6;BRD2;BRD3;BRD4;CALCOCO1;CAMTA2;CBX2;CBX4;CBX5;CBX7;CCNT1;CDCA5;CDK9;CENPB;CHD8;CITED2;COQ7;CREB3;CSNK2B;DDX1;DHX30;DLX2;DNAJC2;DNMT1;DNMT3A;EBF2;EED;EGFR;ELK4;ENY2;EP300;ERCC6;ERG;ESR1;EXO1;EZH2;FAAP24;FBRSL1;FLI1;FOSL2;FOS;FOXP1;GABPA;GATA2;GATA3;GATA4;GATA5;GATA6;GLI…	235	13536	291	18107	0.00910189	0.446457
GO:0009986	cell surface	cellular_component	5	AAMP;ABCA7;ABCB1;ACKR3;ACVR1B;ACVR2A;ACVRL1;ADAM10;ADAM15;ADAM17;ADAMTS15;ADAMTS7;ADAMTS9;ADGRA2;ADGRG2;ADGRV1;ANGPTL3;ANTXR1;ANXA4;ANXA9;APMAP;APOH;APP;AQP11;ATPIF1;BGN;BMP2;BMPR2;BSN;BST2;C1QBP;CAPN5;CD109;CD38;CD40LG;CD44;CD55;CD58;CD59;CD63;CD93;CEL;CEP41;CFTR;CLEC2D;CLEC5A;CLIC4;CLMP;CLSTN2;CLSTN3;CNTN2;CNTNAP2;CPM;CSF1R;CX3CL1;CXADR;CXCR4;DCBLD2;DLA-DMA;DLA-DRA;DPP4;DSG2;EGFR;EMP2;EMR4;ENPP…	233	13536	294	18107	0.0404755	0.92626
GO:0006357	regulation of transcription by RNA polymerase II	biological_process	12	AATF;ABCA2;ABT1;ANKRA2;ANXA4;ARID4A;ARID4B;ARID5A;ASCL2;ASCL3;ASIC1;SMARCD1;ATF3;ATP2B4;BARX1;BATF2;BRD2;BRD3;BRD7;BRD8;BRWD1;BRWD3;CAMK2D;CCNA2;BBS7;CDX2;CIR1;CITED2;CLOCK;COR52H8;CTDSP1;DGKQ;ECM1;EHF;ELF1;ELF2;ELF3;ELF4;ELF5;ELK1;ELK3;ELK4;ELMSAN1;ELP1;ELP3;ENY2;EPC1;EPC2;EPM2AIP1;ERF;ERG;ETS1;ETS2;ETV1;ETV3;ETV5;ETV6;FAM200A;FAM200B;FLI1;FOSL1;FOXJ3;FOXK1;FOXL1;FOXP4;GABPA;GABPB1;GLIS3;GLO1;GM…	232	13536	281	18107	0.00106848	0.113428
GO:0019901	protein kinase binding	molecular_function	7	ACSL3;ACTA2;ACVRL1;ADAM10;ADRA2A;AKAP7;AKT1;ANK2;AP1B1;AP2A1;AP2A2;ARHGEF7;ATF2;ATG13;AURKA;AXIN1;AXIN2;B4GALT1;BAD;BAG5;BCAR1;BCL2L14;BCL2L1;BRSK1;BRSK2;CACUL1;CADPS;CALM3;CASP9;CAV1;CAV2;CCNA2;BBS7;CCNB3;CCND1;CCND2;CCND3;CCNE1;CCNK;CCNL2;CCNYL1;CCNY;CDC25A;CDC25C;CDC37;CDK5R1;CDK5RAP2;CDKN2A;CDKN2B;CDKN2C;CDKN2D;CENPJ;CEP250;CEP68;CHEK2;CLTC;CNPPD1;CNTLN;CRY1;MTERF2;CRY2;CTNNB1;CYB5R1;ADIPOR1;…	230	13536	260	18107	2.48484e-08	1.63581e-05
GO:0003723	RNA binding	molecular_function	6	ABT1;ADAT1;AKAP1;ALYREF;ANKHD1;EIF4EBP3;ANKRD17;ASCC1;ATXN1L;ATXN1;BARD1;BICC1;BRIX1;C1D;C20H19orf66;CAPRIN1;CELF2;CELF3;CELF6;CHERP;CHRNA10;NUP98;CHTOP;CIRBP;CMSS1;CNOT4;CNOT7;CNP;CPEB3;CPEB4;CPSF3;CPSF4;CTIF;CWC15;CWC22;DCP2;DDX50;DDX55;DICER1;DKC1;EARS2;EIF4E2;EIF4G2;EIF4G3;ELAVL2;ELAVL4;EPRS;EWSR1;EXOSC1;EXOSC2;EXOSC3;EYA1;EZH2;FARSB;FMR1;FUBP1;FXR1;HBP1;HDLBP;LOC106557803;HNRNPA2B1;HNRNPH1;H…	228	13536	267	18107	1.48452e-05	0.00442104
GO:0005576	extracellular region	cellular_component	3	ABHD18;ADCYAP1;ADM2;ADM5;ADM;AGGF1;AMBP;ANGPTL7;ANOS1;APOL5;APOL6;APOLD1;ARMC8;ARSK;ATG4C;BMP7;C15H12orf73;C17H1orf54;CIART;C1H18orf54;C1QL1;C1QTNF3;C1QTNF7;C1R;C26H12orf49;C2;C30H15orf61;C37H2orf69;C3H4orf48;C8H14orf93;CCL27;LOC111098084;CD14;CD163;CD2;CD55;CD59;CDNF;CFB;CFH;CGA;CHI3L1;CHST9;CHSY1;CLCF1;CMA1;COL26A1;COL8A2;COMMD9;CRISPLD1;CXCL12;CYB5D2;DHRS13;DKK3;DSCAM;EFNA5;EMILIN2;EPHB2;ERBB4…	213	13536	343	18107	1	1
GO:0043565	sequence-specific DNA binding	molecular_function	7	ALX3;ATF3;ATF6B;ATF7;BPTF;CALCOCO1;CAMTA1;CAMTA2;CEBPB;CENPB;CHCHD2;CLOCK;CREB1;CREB3L1;CREB5;CREBL2;CREBRF;CREBZF;CREM;CSRNP1;CSRNP2;CUX1;SH2B2;CXXC5;E2F1;EDF1;ELF2;ELF5;ELK4;EMX2;EPAS1;ERF;ERG;ETS1;ETV1;ETV4;ETV7;EZH2;FOXA3;FOXC2;FOXJ3;FOXL1;FOXM1;FOXN2;FOXN3;FOXO1;FOXO3;FOXO4;FOXP1;FOXP2;FOXP4;GATAD1;GATAD2B;GRHL1;GRHL2;GRHL3;GTF2E1;HDAC4;HIC1;HIF1A;HIVEP1;HIVEP2;HIVEP3;HLF;HLX;HNF4A;HNF4G;HOX…	210	13536	305	18107	0.992085	1
GO:0005789	endoplasmic reticulum membrane	cellular_component	11	AADAC;ABCD4;ALG10;ALG13;ALG14;ALG3;ALG5;ALG6;ALG8;ANKS4B;ANXA7;ATF6B;ATG101;BAX;CANX;CDS1;CDS2;CEPT1;CISD2;CLN8;CLSTN2;CNIH1;CTDNEP1;CYP1A1;CYP7B1;DAD1;DDOST;DDRGK1;DGAT1;DHRS7B;DIO1;DLG1;DPAGT1;DPM1;DPM2;DPM3;DTNBP1;EIF5A;ERLIN1;ERLIN2;EXTL3;FADS2;FKBP10;FKBP11;FKBP1A;FKBP2;FKBP3;FKBP4;LOC102155834;FKBP5;FKBP7;FKBP8;FKBP9;FKBPL;FMN2;FMO3;FMO4;FMO5;FXYD3;GOSR2;GPAT3;HACD2;HERPUD1;HMGCR;HPN;HSP90B…	206	13536	233	18107	1.47868e-07	8.12389e-05
GO:0016567	protein ubiquitination	biological_process	10	AKT1;AKTIP;ANAPC16;ARIH1;ARRB1;ASB11;ASB15;ASB3;ASB5;ASB7;ASB8;ASB9;BACH1;BACH2;BFAR;BIRC3;BIRC5;BIRC6;BRAP;C31H21orf58;CAND1;CAND2;CBLB;CBLL1;CCNF;CDCA3;CDK16;UBA1;CDK8;CISH;CRBN;CUL7;CUL9;DCAF15;DCAF17;DCAF1;DET1;ENC1;FANCL;FBXL15;FBXL22;FBXL3;FBXL5;FBXL6;FBXL7;FBXO11;FBXO18;FBXO21;FBXO25;FBXO2;FBXO30;FBXO32;FBXO33;FBXO6;FBXO7;FBXO9;FBXW2;LOC106559510;FBXW5;FBXW7;FBXW8;FBXW9;FEM1A;FEM1B;FEM1C;G…	205	13536	307	18107	0.999366	1
GO:0004674	protein serine/threonine kinase activity	molecular_function	8	AAK1;ADCK5;AKT1;AKT2;AKT3;ALPK1;ALPK2;ALPK3;ARAF;ATM;ATR;BMP2K;BRAF;BRSK1;BRSK2;CAB39;CAMK1D;CAMK1;CAMK2D;CAMK2G;CAMKK1;CAMKK2;CASK;CDC42BPA;CDC42BPB;CDC42BPG;CDC7;CDK10;CDK15;CDK16;UBA1;CDK18;CDK20;CDK2;CDK5;CDK8;CDKL2;CDKL3;CDKL5;CHEK2;CIT;CLK1;CLK2;CLK3;CLK4;CNTD1;COQ8B;CPNE3;CSNK1A1;CSNK1D;CSNK1E;CSNK1G2;CSNK1G3;CSNK2A1;CSNK2A2;DAPK2;DAPK3;DCLK1;DCLK2;DMPK;DSTYK;DYRK1A;DYRK1B;DYRK2;DYRK3;ERN1…	203	13536	243	18107	0.000629281	0.0837345
GO:0045893	positive regulation of transcription, DNA-templated	biological_process	12	AGT;ANKRD49;APBB1;ARID1A;ASPH;ATF7IP;ATMIN;ATOH8;ATXN7L3;AXIN1;BAMBI;BANP;BLOC1S2;BPTF;BRCA1;BRCA2;BRD7;BRPF1;BTRC;CAMK4;CAPN3;CASZ1;CCNA2;BBS7;CD38;CDH1;CDK2;CDK5RAP2;CEBPB;CEP290;CHEK2;CHURC1;CLOCK;CNBP;COL1A1;CREB5;CREBL2;CTNNB1;DAB2;DDX17;DDX5;DNAJC2;DVL1;DVL3;DYRK1B;E2F3;EBF1;EGF;ELF2;ENY2;ERBB4;ERCC2;ETS2;F2R;FBXW11;FGF7;FOXA2;FOXK1;FZD4;FZD7;GATA3;GATA4;GDF6;GPBP1L1;GPBP1;HAND2;HINFP;HIPK2…	202	13536	242	18107	0.000708456	0.0868762
GO:0004842	ubiquitin-protein transferase activity	molecular_function	6	AREL1;ARIH1;BACH1;BACH2;BARD1;BCOR;BIRC2;BIRC3;BIRC5;BIRC6;BRAP;BRCA1;BTBD19;C31H21orf58;CBLB;CBL;CDK16;UBA1;CHFR;ZNF605;CNOT4;CUL5;DDB2;DTL;DTX3L;ELOC;ERCC8;FANCL;FBXL15;FBXL18;FBXL2;FBXL3;FBXL6;FBXL8;FBXO11;FBXO21;FBXO25;FBXO32;FBXO41;FBXO44;FBXO4;FBXW12;FBXW2;LOC106559510;FBXW8;FBXW9;FEM1A;FEM1B;G2E3;GAN;HACE1;HECTD1;HECTD2;HECTD3;HECTD4;HECW2;HERC1;HERC3;HERC4;HERC5;HERC6;HUWE1;IPP;ITCH;KBTBD…	200	13536	306	18107	0.999915	1
GO:0000978	RNA polymerase II proximal promoter sequence-specific DNA binding	molecular_function	11	ACTL6A;AEBP2;AKNA;ARID3B;ARNT2;ASCL2;ATF3;ATF4;BATF2;BHLHE41;CC2D1A;CC2D1B;CEBPA;CEBPD;CEBPG;CEBPZ;CHD4;CLOCK;CREB1;CREB3L2;CREB3;CUX2;DDIT3;DPF2;E2F4;E2F8;EBF1;EBF2;EBF3;EHF;ELF1;ELF3;ELF4;ELK1;ELK3;EN1;EP300;ESR1;ESRRA;ETS2;ETV1;ETV6;FLI1;FOSB;FOSL1;FOSL2;FOS;FOXA2;FOXJ1;FOXJ2;FOXK2;FOXP1;FOXP2;FUBP3;GABPA;GCFC2;GLI1;GLI2;GMEB1;GMEB2;GRHL1;GZF1;H2AFZ;HDAC2;HHEX;HINFP;HLTF;HNRNPK;HOXA10;HOXA2;HO…	198	13536	248	18107	0.0350794	0.910319
GO:0031625	ubiquitin protein ligase binding	molecular_function	7	ABI2;AKTIP;AMBRA1;ANAPC2;ARIH1;ARRB1;ASB4;ATP6V0C;AURKA;AXIN1;AXIN2;BAG4;BAG5;BAG6;BCL10;BID;BLZF1;CACUL1;CALR;CASC3;CASP8;CCDC50;CCT2;CD40;CDC34;CDKN1A;CHEK2;CLU;CUL1;CUL2;CUL3;CUL4A;CUL4B;CUL5;CUL7;CUL9;CXCR4;DAXX;DBT;DERL1;DET1;DLG3;DNAJA1;DNM1L;DTX1;EGFR;EIF4E2;ERLIN1;ERLIN2;FAF1;FAF2;FBXW7;FHIT;FOXO1;FZD4;FZD5;FZD6;GLMN;GPI;GSK3B;HDAC6;HIF1A;HM13;HSPA5;HSPA9;IKBKE;IKBKG;JAK1;KBTBD4;KDM4A;LOC…	194	13536	214	18107	2.70919e-09	2.2591e-06
GO:0007186	G-protein coupled receptor signaling pathway	biological_process	8	ABCA1;ACKR2;ACKR3;ACKR4;ADCYAP1R1;ADGRA2;ADGRA3;ADGRB1;ADGRB2;ADGRB3;ADGRE1;ADGRE5;ADGRF1;ADGRF3;ADGRF5;ADGRG1;ADGRG2;ADGRG6;ADGRL1;ADGRL2;ADGRL3;ADGRL4;ADGRV1;ADIPOR2;AGT;APLNR;APOA1;APOE;ARHGEF11;ARHGEF12;ATRNL1;BAIAP3;BCAR1;BDKRB1;BDKRB2;BHLHA15;C3AR1;C5AR1;CCKBR;CCL17;CCL20;CCL23;CCL24;CCL25;CCL5;CCL7;CCL8;CCR1;CCR5;CELSR1;CELSR2;CELSR3;CHML;OPN3;CMKLR1;CX3CL1;CX3CR1;CXCL10;CXCL12;CXCL8;CXCR4…	191	13536	453	18107	1	1
GO:0008284	positive regulation of cell proliferation	biological_process	5	ACER2;ACER3;ADAM10;ADAM17;ALDH1A2;ASH2L;BAMBI;BCL2L1;BIRC6;BLOC1S2;BRK1;CACUL1;CALR;CARM1;CCAR1;CCKBR;CD248;CD47;CDC7;CDCA7L;CDK2;CDKN1B;CEP131;CHP2;CHTOP;CLCF1;CLEC11A;CNBP;CNOT6L;CNOT6;CNOT7;CNOT8;CNTFR;CRIP2;CRKL;CRLF1;CSF1R;CSNK2A1;CTSH;CUL4A;CXCL10;DBF4B;DERL2;DLG1;DLL1;DNAAF4;CCPG1;DPP4;E2F3;EAPP;EIF5A2;EMP2;EPHA1;ERBB4;EREG;ESM1;FER;FGF18;FGF19;FGF21;FGF5;FGFBP1;FGFR1OP;FGFR2;FGFR3;FGFR4;F…	188	13536	228	18107	0.00343194	0.239814
GO:0008285	negative regulation of cell proliferation	biological_process	5	ADARB1;ADGRG1;AIMP2;ALDH1A2;ALOX15B;AMBRA1;ASPH;ATF5;AXIN2;B4GALT1;BMP2;BRD7;BTG1;C1H18orf54;CBFA2T3;CD9;CDH13;CDH5;CDKN1A;CDKN2A;CDKN2B;CDKN2C;CDKN2D;CEBPA;CIB1;CLMN;CNOT7;CSF1R;CSK;CTNNB1;CUL5;DAB2IP;DDR1;DIS3L2;DLC1;DLEC1;DLL1;DNAJA3;DPT;E2F7;EEF1E1;ERBB4;EREG;ETV3;F2R;FGF2;FGFRL1;FKTN;FNTB;FOXO4;FRZB;FTH1;FZD5;GATA3;GDF11;GPLD1;GSDME;GTPBP4;HDAC4;HNF4A;HRAS;HSF1;IFIT3;ING1;ING2;ING4;ING5;INHB…	188	13536	229	18107	0.00503566	0.309496
GO:0007264	small GTPase mediated signal transduction	biological_process	8	AGAP1;AGAP2;AGAP3;ARF1;ARF3;ARF4;ARF5;ARF6;ARFRP1;ARHGAP18;ARHGAP1;ARHGAP31;ARHGAP35;ARHGAP5;ARHGEF7;ARL10;ARL13B;ARL15;ARL16;ARL17A;ARL2;ARL3;ARL4A;ARL4C;ARL4D;ARL5A;ARL5B;ARL6;ARL8A;ARL8B;ARL9;BCAR3;CDC42;CHML;OPN3;CHM;CRACR2A;DAB1;DIRAS2;DNAJA3;DNAJC27;DOCK10;DOCK11;DOCK1;DOCK2;DOCK3;DOCK4;DOCK5;DOCK6;DOCK7;DOCK8;DOCK9;GDI1;GDI2;GEM;IFT22;IFT27;IQGAP1;IQGAP2;LOC100686305;LOC102156319;LOC106558…	179	13536	212	18107	0.000432695	0.063226
GO:0045892	negative regulation of transcription, DNA-templated	biological_process	12	AGBL4;ARHGAP35;ARID4A;ARNTL;ATF5;ATOH8;ATP8B1;BCL3;BCL7A;BCLAF1;BIRC5;BMP7;BRD7;BTRC;C17H1orf54;CIART;C18H11orf84;C1D;CAPN3;CBFA2T2;CBFA2T3;CBX1;CBX5;CCAR2;CCDC85B;CD38;CDK5R1;CDK5;CDKN1B;CIPC;CIR1;CLOCK;COPS2;CREM;CRY2;CTNNB1;DAB2IP;DAB2;DAXX;DEPDC1;DKK3;DNAJB6;ELF2;ELF3;ELK3;EREG;EZH2;FBXW11;FOXK1;FZD1;GATA3;GCLC;GMNN;GON4L;GREM1;HDAC9;HMBOX1;HR;IKZF4;ILF3;ING4;INPP5K;IRF1;ISL1;KAT6A;KAT6B;KAT8…	175	13536	219	18107	0.0432345	0.92626
GO:0043066	negative regulation of apoptotic process	biological_process	9	AAMDC;ADAR;AGAP2;AIPL1;AK6;TAF9;ALB;ALMS1;AMIGO2;ANGPT4;APBB2;APIP;AQP1;AREL1;ARF4;ARHGAP10;ASIC2;ASNS;ATF5;ATG5;AURKA;BAG6;BARD1;BCL2A1;BCL2;BCL3;BIRC5;BMP4;BNIP3;BRAF;CAMK1D;CAPN3;CASP3;CBL;CD38;CD40LG;CDK1;CDKN1B;CERKL;CHST11;CIAPIN1;CIB1;CITED2;CKMT1A;CLN8;COMP;COPS5;CSF1R;CTSH;CYR61;DAB2;DAD1;DDB1;DHRS2;DNAJA1;DNAJC3;DPEP1;EGFR;EGR3;EIF2AK2;SULT6B1;ERBB4;FAIM;FAM129B;FHL2;FKBP8;FLNA;FMN2;FOX…	174	13536	203	18107	9.59109e-05	0.0193493
GO:0005096	GTPase activator activity	molecular_function	5	ABR;ACAP1;ACAP2;ACAP3;ADAP1;ADGRB3;AGAP1;AGAP2;AGAP3;AGFG1;AGFG2;ARAP1;ARAP2;ARAP3;ARFGAP1;ARFGAP2;ARFGAP3;ARHGAP10;ARHGAP18;ARHGAP1;ARHGAP22;ARHGAP23;ARHGAP24;ARHGAP26;ARHGAP31;ARHGAP35;ARHGAP42;ARHGAP4;ARHGAP6;ARRB1;ASAP1;ASAP2;ASAP3;AXIN1;AXIN2;BCR;C30H15orf62;CDC42EP1;CDC42EP2;CDC42EP3;CDC42EP4;CDC42EP5;CHML;OPN3;CHN1;CHN2;DAB2IP;DEPDC5;DLC1;DOCK1;DOCK2;DOCK4;ECT2;ELMOD2;ELMOD3;EVI5L;EVI5;GAR…	173	13536	201	18107	6.07921e-05	0.0131101
GO:0006886	intracellular protein transport	biological_process	7	AP1B1;AP1G1;AP1G2;AP1M1;AP1M2;AP1S1;AP1S2;AP2A1;AP2A2;AP2B1;AP2M1;AP2S1;AP3B1;AP3B2;AP3D1;AP3M1;AP3M2;AP3S1;AP3S2;AP4B1;AP4E1;AP4M1;ARFIP1;ASPSCR1;BCAP29;BCAP31;CD74;CDK5;CHML;OPN3;CLTA;CLTB;CLTCL1;CLTC;COG3;COG7;COPB1;COPB2;COPG1;COPG2;COPZ1;CTTN;DSCR3;ERP29;EVI5L;EVI5;EXPH5;GGA1;GGA2;GGA3;GRTP1;HID1;KIF13A;LOC100686682;LOC102152829;LOC102154542;LOC102154740;LOC102155463;LOC111097364;LOC480654;L…	171	13536	193	18107	1.21609e-06	0.000543245
GO:0003735	structural constituent of ribosome	molecular_function	4	DAP3;DHRS1;LOC102157274;DNAJC9;MRPS16;FAU;IMP3;LOC100682542;LOC100685611;LOC100687285;LOC100688849;LOC100855841;LOC100856673;LOC100856765;LOC102151445;LOC102155800;LOC106557826;LOC106558887;LOC106559170;LOC106559787;LOC476206;LOC607794;LOC608703;LOC611922;LOC611915;MRPL11;MRPL12;MRPL13;MRPL14;MRPL15;MRPL17;MRPL18;MRPL19;MRPL1;MRPL20;MRPL21;MRPL22;MRPL24;MRPL27;MRPL28;MRPL2;MRPL32;MRPL33;MRPL34;MR…	171	13536	247	18107	0.97988	1
GO:0003779	actin binding	molecular_function	6	ABLIM1;ABLIM2;ABLIM3;ABRACL;ACTR2;ALKBH4;ANLN;AVIL;CTDSP2;BCL7B;CALD1;CAP1;CAP2;CAPG;CAPZA1;CAPZA2;CCDC88A;CCR5;CFL1;CFL2;CLMN;CNN1;CNN2;CNN3;COTL1;CXCR4;DAAM1;DAAM2;DAG1;DIAPH1;DIAPH2;DIAPH3;DMD;DMTN;DNASE1;DSTN;DST;EMD;ENC1;EPB41L1;EPB41L2;EPB41L3;EPB41;EPS8L1;EPS8L2;EPS8;EVL;FHL3;FLII;FLNB;FMN2;FMNL1;FMNL3;GAS2L3;GCSAM;GIPC1;GMFB;GMFG;GSN;LOC102154209;HCLS1;HIP1R;HIP1;HOOK1;IMPACT;IPP;ITGB1;JM…	160	13536	197	18107	0.0194773	0.68078
GO:0005743	mitochondrial inner membrane	cellular_component	13	ABCA12;ABCA8;ABCA9;ABCB10;ABCB6;ABCB7;ABCD3;ACAA2;ACSL5;AFG3L2;AK2;ALDH3A2;ATAD3A;ATP5G1;BDH1;CHCHD6;CHDH;CLPX;COQ10B;COQ9;COX5A;CPT1A;CSDE1;CYB5B;CYB5R3;CYC1;CYP27A1;DHODH;DHRS1;LOC102157274;DNAJC11;DNAJC15;DNAJC19;ECI1;EFHD1;FDXR;GCAT;GPAM;GPD2;GRPEL2;HADHA;HADH;HIGD1A;HIGD2A;HMGCL;HMGCS2;IDH2;IMMP2L;LETM1;LGALS3;LOC100688849;LOC102152873;LOC102155410;LOC102157317;LOC106558179;LOC111096076;LOC4…	152	13536	168	18107	2.00975e-07	0.000100552
GO:0006412	translation	biological_process	7	CPEB1;CPEB2;CPEB3;CPEB4;EEF2;EEFSEC;EFL1;EIF5B;FAU;GTF2H3;GUF1;HBS1L;IGHMBP2;LOC100682542;LOC100685611;LOC100687285;LOC100856673;LOC100856765;LOC102151445;LOC102155800;LOC106557826;LOC106558887;LOC106559170;LOC106559787;LOC111093016;LOC476206;LOC611215;LOC611922;LOC611915;MRPL11;MRPL12;MRPL13;MRPL14;MRPL15;MRPL17;MRPL18;MRPL19;MRPL1;MRPL20;MRPL22;MRPL24;MRPL27;MRPL32;MRPL33;MRPL34;MRPL35;MRPL36;M…	152	13536	212	18107	0.866033	0.99779
GO:0008134	transcription factor binding	molecular_function	5	AHR;APBB1;APBB2;APBB3;ARRB1;ATG7;BCAS3;BCL3;BCOR;BPTF;BRD7;C1QBP;CAMTA2;CCND1;CD34;CEBPA;CEBPG;CENPF;CHCHD2;CRY1;MTERF2;CSNK2B;CXXC5;DAXX;DOT1L;E2F1;E2F4;E2F5;EBF4;ELMSAN1;EP300;EPAS1;ERCC3;ESR1;FHL2;FLNA;FOS;FOXA2;FOXA3;FOXO1;FOXO4;GTF2F1;HAND2;HDAC11;HDAC9;HIF1A;HMGB2;HOXA7;HTT;HYAL1;ID3;IGHMBP2;JUNB;JUND;JUN;KAT2A;KAT2B;KAT6A;KAT6B;KAT8;KCTD1;LOC111096933;KEAP1;LEF1;LMO4;LOC100856137;LOC486817…	150	13536	168	18107	1.85404e-06	0.000773011
GO:0003924	GTPase activity	molecular_function	9	AGAP1;ARHGDIB;ARL1;ARL2;ARL3;ATL1;ATL2;ATL3;BMS1;DNAJC27;DNM1L;DNM1;DNM2;DNM3;EEF1A1;EEF1A2;EEF2;EEFSEC;EFL1;EFTUD2;EIF2S3;EIF5B;GBP1;GBP5;GEM;GFM1;GFM2;GNA12;GNA13;GNA14;GNA15;GNAI1;GNAI2;GNAI3;GNAL;GNAO1;GNAQ;GNAT2;GNB1;GNB2;GNGT2;GNL1;GNL2;GNL3L;GNL3;GSPT1;GSPT2;GTPBP10;GTPBP1;GTPBP2;GTPBP3;GTPBP4;GUF1;HBS1L;HRAS;KRAS;LOC100686305;LOC100855995;LOC100856176;LOC100856405;LOC100856742;LOC10215264…	147	13536	169	18107	6.72127e-05	0.0142491
GO:0008017	microtubule binding	molecular_function	7	APC2;ARHGEF2;ARL3;BCL2L11;BIRC5;CAMSAP1;CAMSAP2;CAPN6;CASC1;CCDC187;CCDC69;CCDC88A;CCSER2;CDK5RAP2;CENPE;CEP350;CEP57L1;CEP57;CETN2;CETN3;CHD4;CHP1;CLASP2;CLIP3;CRIPT;DPYSL2;DYNC1I1;EML1;EML2;EZR;FAM83D;FES;FGF13;FMN1;FNTA;GAPDH;GAS2L2;GAS2L3;GAS8;GLI1;HDAC6;HDGFL3;HOOK1;HOOK3;JAKMIP2;KATNA1;KATNAL1;KATNB1;KIF11;KIF12;KIF13A;KIF13B;KIF14;KIF15;KIF16B;KIF18B;KIF1A;KIF1B;KIF1C;KIF20A;KIF20B;KIF21A;…	144	13536	181	18107	0.0771731	0.92626
GO:0005768	endosome	cellular_component	9	ABCA2;ABCB6;ACKR3;ANXA1;AP1AR;APP;ARPC2;ARRDC3;ARRDC4;ASTN1;ASTN2;ATP6V0B;ATP8A2;ATP9A;BDKRB2;BET1L;BIRC6;BLOC1S6;C11H9orf72;C6H16orf62;CALCRL;CAV1;CCDC120;CCR5;CD164;CDH1;CDK2;CLVS1;CUBN;CYBA;DGKH;DSCR3;EXPH5;EZR;FAM227A;FLOT2;GIF;GOLPH3;GRAP2;GRB2;KCNK1;KDR;LEPROTL1;LOC102151615;LOC102151812;LOC102153553;LOC102154270;LOC102154664;LOC102155568;LOC102156502;LOC102156665;LOC102157331;LOC106558034;…	144	13536	235	18107	0.999998	1
GO:0000287	magnesium ion binding	molecular_function	7	AASDHPPT;ABL1;ABL2;ADSS;ATP10A;ATP10B;ATP10D;ATP11A;ATP11C;ATP8A1;ATP8A2;ATP8B1;ATP8B2;ATP8B4;ATP9A;ATP9B;BPNT1;BRSK1;BRSK2;CDC42BPA;CERK;CIB2;CLYBL;COMT;CSNK1G3;DCTPP1;DIS3L2;DUT;DYRK2;DYRK3;ENDOV;ENO1;ENO2;ENO3;ENOPH1;ENOSF1;EPHX2;ERN1;EYA2;FARS2;FARSB;FEN1;FOXK2;GCLC;GEM;GNAI1;GSS;GTPBP10;HAUS7;TREX2;HMGCL;HPRT1;ICK;IDH1;IDH2;IDH3A;IDH3B;IDH3G;IDI1;ILVBL;IMPA1;IMPA2;IMPAD1;INPP1;IRAK3;IRAK4;IT…	143	13536	168	18107	0.000768523	0.093327
GO:0030054	cell junction	cellular_component	3	ABCA7;ANKS1B;ARHGAP28;ARHGEF7;ATAD1;BCAS2;BRSK1;BSN;C29H8orf37;C3H4orf19;CADPS;CDK5RAP2;CDK5;CEP68;CHRM2;CHRM3;CHRNA10;NUP98;CHRNA4;CHRNA5;CHRNA7;CHRNB1;CHRNB2;CHRNB4;CLCA2;CPEB3;CRB3;CRIPT;CTNNB1;CXCR4;CYFIP2;DDB2;DLG1;DLG2;DLG4;DMD;DSCAM;DSTYK;DTNA;ENAH;EPB41;ERC2;FER;FOXA2;GABRA3;GABRB3;GABRE;GID8;GPHN;GPR142;GRIA1;GRIA2;GRIA3;GRIA4;GRID2;GRIK3;GRIK4;GRIN1;GTF2A2;GTF2F1;HIKESHI;HMCN1;HMCN2;IFI…	139	13536	204	18107	0.986877	1
GO:0019899	enzyme binding	molecular_function	5	ABCD1;AKIRIN2;ALOX5AP;APOA1;APP;ARMT1;ARPC4;ATP2A2;BTG1;CABYR;CAD;ATRAID;CBX4;CDC20;CFTR;CNTNAP2;COPS5;COTL1;CPSF1;CREB1;CTNNBL1;CUTA;DDC;DHCR24;DIS3L;DNMT3L;DYM;EHHADH;EIF4E;ERN1;ESR2;FOXO4;GOLPH3;HACD1;HACD2;HACD3;HACD4;HDAC2;HDHD2;HINFP;HLCS;HNRNPUL1;AXL;HOXA9;HSPA2;IL6R;IQCB1;ITGB3;JUND;JUN;KAT8;KDM1A;KDM4C;LAMP1;LAMP2;LDB1;LDB2;LOC479911;LOC479912;LOC489372;LYN;MAT2B;MCM10;MDM4;MLEC;MMS19;MS…	137	13536	154	18107	8.36604e-06	0.00270148
GO:0001077	transcriptional activator activity, RNA polymerase II proximal promoter sequence-specific DNA binding	molecular_function	7	AKNA;ARID3B;ARNT2;ATF2;ATF4;CAMTA1;CAMTA2;CEBPA;CEBPD;CEBPG;CEBPZ;CREB3L2;CREB3;CREB5;DBP;DDIT3;EBF1;EBF2;EBF3;EBF4;EGR1;EHF;ELF1;ELF3;ELF4;ELK1;ELK3;EPAS1;ESR1;ESRRA;ETV1;ETV6;FLI1;FOSB;FOS;FOXC2;FOXJ1;FOXJ2;FOXK2;FUBP3;GABPA;GATA3;GLI2;GLIS2;GMEB1;GRHL1;HAND2;HIF1A;HLTF;HNRNPK;HOXA10;HOXA5;HOXA7;IRF1;JUNB;KLF4;KLF5;LEF1;LOC102151229;LOC102153657;LOC111091360;LOC449531;LOC490969;MAFB;MEF2A;MEF2B…	135	13536	176	18107	0.308462	0.92626
GO:0005102	receptor binding	molecular_function	5	ABCA1;ABL1;ABL2;ACOT4;ACOX1;ACOX2;ACOX3;AMACR;ANGPTL1;ANKRD13C;ARPP19;ASIC1;SMARCD1;BMX;BTK;C1QTNF2;CADM1;CADM2;CADM3;CADM4;CAPRIN2;CAV1;CCDC129;CD200;CD276;CD2;CD58;CD70;CDH5;CLCF1;CNPY3;CNPY4;CNTFR;CRAT;CSK;CSNK2B;CTNND1;CXCL12;DAO;DLA-64;DLA-79;DMTN;DPP4;ECI2;EHHADH;ENSA;EPHB2;EPHX2;F2R;FER;FES;FGR;FIS1;CLDN15;FKBP1B;FRK;FYN;GBA;GIPC1;GJA1;GLA;GNPAT;GPHN;GUSB;HCK;HFE;HILPDA;HMGCL;HNF4A;IDE;IDH…	134	13536	182	18107	0.673376	0.92626
GO:0005765	lysosomal membrane	cellular_component	12	ABCB9;ACPP;AHNAK;ANKFY1;ANXA6;AP3B1;AP3D1;AP3M1;AP5B1;ARL8A;ATP11A;ATP13A2;ATP6V0A2;ATP6V0C;ATP6V0D1;ATP6V1A;ATP6V1B2;ATP6V1C1;ATP6V1C2;ATP6V1D;ATP6V1H;C7H18orf8;CAD;ATRAID;CCDC154;CLCN7;CD63;CDK16;UBA1;CLCN5;CLCN6;CLEC16A;CLN3;CLN5;COL6A1;CP;CTNS;CYBASC3;DAGLB;DEPDC5;DLA-DRA;DNAJC13;DPP4;ECE1;EGF;ENPEP;ENPP1;FLOT1;GAA;GBA;GDAP2;GNAI1;GNAI3;GNAQ;GNB1;GNB2;GNB4;GPLD1;HGSNAT;HM13;LAMTOR2;LAPTM5;LOC…	133	13536	140	18107	1.92222e-10	2.00359e-07
GO:0001701	in utero embryonic development	biological_process	9	ACVR1B;ACVR1;ACVRL1;ADAM10;ADAR;ALKBH1;AMOT;ANGPT1;ANKRD11;APBA2;APOB;ARNT2;B9D1;BCL2L11;BCL2L1;BMP2;BMPR1A;BRK1;BTF3;C2CD3;C6;CCM2;CCNB2;CHD8;COL4A3BP;COPS3;CTNNB1;CUL4A;DNMT3L;EDN1;EDNRA;EIF2S2;EIF4E2;ELL;ENDOG;EPB41L5;EPN1;ERCC2;ETNK2;FGFR1;FLCN;FLVCR1;FOSL1;FOXF1;FOXP1;GABPA;GATA3;GATA6;GJA1;GLI2;GNA12;GNA13;GPI;HAND2;HEG1;HHEX;HINFP;HSD17B2;INPP5B;INPP5K;ITGB1;JAG2;KAT2A;KDM1A;KDM6A;KEAP1;KI…	133	13536	148	18107	3.02971e-06	0.00122244
GO:0000139	Golgi membrane	cellular_component	11	ACBD3;ANKRD28;ARFGEF1;ARFGEF2;ATP2C1;ATP8A1;ATP8A2;B3GALNT1;B3GALNT2;B3GALT1;B3GALT2;B3GALT4;B3GALT6;B3GNT2;B3GNT3;B3GNT4;B3GNT5;B3GNT7;B3GNT9;B4GALT1;BCAP31;BET1L;BET1;BLZF1;CAV1;CAV2;CD55;CHP1;CHST1;CHST2;CHST3;CHST9;CHSY3;CLSTN2;CNIH1;CREB3;CSNK1D;CUL3;CYTH1;DOPEY1;DOPEY2;EBAG9;ERC1;GALNT10;GALNT11;GALNT12;GALNT13;GALNT15;GALNT16;GALNT17;GALNT18;GALNT1;GALNT2;GALNT3;GALNT4;GALNT5;GALNT6;GALNT7…	131	13536	149	18107	5.26649e-05	0.0120757
GO:0006954	inflammatory response	biological_process	6	ACKR2;AIMP1;AKT1;ANXA1;BDKRB1;BMP2;BMP6;CCL17;CCL20;CCL23;CCL24;CCL25;CCL2;CCL5;CCL7;CCL8;CCR1;CCR5;CD14;CD180;CD40LG;CELA1;CHI3L1;CX3CL1;CXCL10;CXCL8;CYBA;CYBB;CYP26B1;DAB2IP;ECM1;ELF3;FAM227A;FAS;GGT5;HDAC9;HNRNPA0;HRH1;HYAL1;HYAL3;IFRD2;IL17D;IL18;IL1A;IL6;ITGB6;JAK2;KIT;LIAS;LOC100688321;LOC102151615;LOC102151812;LOC102153553;LOC102154078;LOC102154267;LOC102154270;LOC102154664;LOC102155568;LO…	130	13536	264	18107	1	1
GO:0061630	ubiquitin protein ligase activity	molecular_function	7	AKTIP;ANAPC11;ANAPC2;ANKIB1;ARIH1;ARIH2;ASB4;BFAR;BRAP;BTRC;C7H18orf25;CACUL1;CBLC;CBLL1;CDC34;CDK8;CHFR;ZNF605;CUL1;CUL2;CUL3;CUL4A;CUL4B;CUL5;DZIP3;FBXL22;FBXO30;FBXO6;FBXW11;GID4;GRK7;RNF7;HLTF;ITCH;LOC607889;LOC608680;LOC609108;LOC611401;LTN1;MARCH1;MARCH8;MED20;MGRN1;MIB2;MSL2;MYLIP;NEDD4;NEURL1;NHLRC1;PDZRN3;PELI1;PJA1;PRKN;RABGEF1;RAD18;RBX1;RFFL;RFWD2;RLIM;RNF111;RNF114;RNF115;RNF122;RNF1…	129	13536	151	18107	0.00100431	0.11216
GO:0005764	lysosome	cellular_component	11	ABCA2;ABCA5;ACP2;ACP5;ADA;AGA;ANKRD27;AP5S1;ARSG;ASAH1;BCL10;BORCS5;BORCS7;C11H9orf72;CALCRL;CAPN1;LOC612044;CAPN2;CCDC115;CD164;CD74;CHMP2B;CLN5;CTSB;CTSC;CTSD;CTSF;CTSH;CTSO;CTSS;CTSZ;CXCR4;DRAM1;DRAM2;EPDR1;FAM227A;GFAP;GLA;GLB1;TMPPE;GLMP;GPC3;GUSB;HEXA;HPS4;HPSE;HYAL1;HYAL2;HYAL3;IFI30;IFRD2;ITM2C;KCNQ1;KIAA1324;LAMTOR1;LAMTOR4;LGMN;LMBRD1;LOC102151615;LOC102151812;LOC102153553;LOC102154270;…	128	13536	219	18107	1	1
GO:0005769	early endosome	cellular_component	10	ACKR3;ADRB2;ALS2;ANGPTL3;ANKFY1;ANKRD27;ATP6V0D1;BLOC1S1;C6H16orf62;CCDC154;CLCN7;CFTR;CHMP1A;CLCN3;CLN3;CNTNAP2;COMMD1;CORO1A;CXCR4;DERL1;DERL2;DNER;DYSF;ECE1;EEA1;EHD1;EPHA3;F2RL1;F2R;FAM109A;FAM109B;FLOT1;FZD5;GPER1;GPR107;HAVCR1;HFE;HGS;HMGB1;IGF2R;KCNQ1;KIF16B;LDLRAP1;LIPG;LOC100856137;LOC102151745;LOC111090135;LRP6;MGRN1;MIB2;MVB12B;MYO1B;NEURL1B;NF2;NIPA1;NIPA2;NRP1;NTRK1;NUMB;OCRL;PHB;PTP…	126	13536	134	18107	4.56619e-09	3.56962e-06
GO:0003713	transcription coactivator activity	molecular_function	6	AK6;TAF9;ARL2BP;ASIC1;SMARCD1;ASXL1;ATXN7L3;BCL10;BIRC2;BRD7;CBFB;CD3D;CEBPA;CREBBP;CTNNB1;DDX5;DYRK1B;ECD;EDF1;ELF3;ENY2;EP300;FHL5;FUS;GATA3;GATA4;GMEB1;GMEB2;GTF2A1;GTF2A2;HAND2;HCFC1;HINFP;ING4;JMY;JUNB;JUND;JUN;KAT2A;KAT2B;KAT5;KAT6A;KDM5A;LOC102152029;LOC102155671;LOC475708;LOC480926;LOC489420;LOC491346;LOC608766;LOC608905;LPIN1;LPIN2;LPIN3;MAK;MAML1;MAML2;MAML3;MED14;MED17;MED1;MED20;MED21…	124	13536	141	18107	8.09165e-05	0.0165919
GO:0005856	cytoskeleton	cellular_component	9	ABI2;ACTB;ACTG1;ADD1;ADD3;AKAP5;ALOX15B;ARHGAP26;ARHGAP39;BOD1;BRCC3;CCDC6;CDC42SE1;CDK2;CFAP100;CFAP54;CNN2;DAG1;DGKQ;DMD;DNAJC24;DPYSL2;DST;ELAVL4;EPB41L1;EPB41L2;EPB41L3;EPB41L4A;EPB41L4B;EPB41L5;EPB41;EPPK1;ERC2;EVL;FAM92A;LOC111093163;FARP1;FARP2;FBRSL1;FILIP1;FNBP1L;FRMD1;FRMD3;FRMD4A;FRMD4B;FRMD5;FRMD6;FRMD8;FRMPD1;FRMPD3;FRMPD4;GAS2L3;GAS2;GAS8;GPHN;HIP1R;HTRA2;ITGB1BP1;JAK1;JAK2;JAK3;KAN…	124	13536	149	18107	0.00879596	0.433149
GO:0005874	microtubule	cellular_component	11	ARHGEF2;BCL2L11;CAMSAP1;CCT2;CCT3;CCT4;CCT5;CCT6A;CDK2AP2;CDK5RAP2;CDK5RAP3;CENPE;CEP170B;CEP57;CFAP20;CLASP2;CNP;CSPP1;DCTN1;DLG1;DNAL1;DNM1L;DNM2;DPYSL2;DYNC1H1;DYNC1I1;DYNC1I2;DYNLL1;DYNLRB1;DYNLRB2;EML3;EML6;FGF13;GAS2L1;GAS2L2;GAS8;HOOK3;HSPH1;IGBP1;INVS;IQGAP1;IQGAP2;KATNA1;KATNAL1;KATNB1;KCNAB2;KIF12;KIF14;KIF18B;KIF20A;KIF22;KIF23;KIF2A;KIF3A;KIF3B;KIF3C;KIF5B;KIF5C;KIF9;KIFC1;KIFC2;KIFC3…	124	13536	156	18107	0.0994897	0.92626
GO:0007155	cell adhesion	biological_process	4	ACKR3;AGGF1;AMIGO1;AZGP1;B4GALT1;CASK;CD44;CD63;CD9;CERCAM;CNTN1;CNTN2;CNTN4;CNTNAP2;COL15A1;COL18A1;COL5A1;COMP;CTDSPL;ITGA9;CTGF;CTNNAL1;CTNNB1;CX3CR1;CXCL12;CYR61;DGCR6L;DSCAM;EFNB2;EPHB4;F11R;FARP2;FERMT1;FER;FES;GRHL2;HAPLN1;HAPLN3;HAPLN4;HAS1;HAS2;HRC;ICAM2;ICAM3;ICAM4;ICAM5;IGFBP7;ITGA11;ITGA3;ITGA6;ITGA7;ITGAM;ITGAX;ITGB3BP;ITGB4;ITGB5;ITGBL1;JUP;KITLG;LAMA1;LAMA2;LAMA3;LAMA4;LAMC2;LMLN;L…	123	13536	165	18107	0.566172	0.92626
GO:0055085	transmembrane transport	biological_process	5	ABCA12;ABCA2;ABCA3;ABCA5;ABCA7;ABCA8;ABCA9;ABCB10;ABCB11;ABCB1;ABCB4;ABCB6;ABCB7;ABCB8;ABCB9;ABCC10;ABCC1;ABCC3;ABCC4;ABCC5;ABCC6;ABCC8;ABCC9;ABCD1;ABCD2;ABCD3;ABCD4;BCL2A1;CAPN1;LOC612044;CYB561;FLVCR1;FLVCR2;GJA5;GPR155;KCNAB2;LOC102152873;LOC478384;LOC481939;LOC489640;LOC611922;LOC611915;LOC612591;MFSD10;MFSD14A;MFSD14B;MFSD1;MFSD3;MFSD4B;MFSD8;MFSD9;MRPL12;NUP35;PANX2;RALBP1;SLC10A3;SLC12A8;S…	122	13536	158	18107	0.269794	0.92626
GO:0006955	immune response	biological_process	4	AZGP1;BLNK;BMP6;BMPR1A;BPI;C6;C7;CCL27;LOC111098084;CCR1;CCR5;CD1A6;CD274;CD36;CD58;CD70;CMA1;CTSH;CXCL10;CXCL12;CXCL8;DLA-12;DLA-64;DLA-79;DLA88;DLA-DMA;DLA-DMB;DLA-DQA1;DLA-DRA;ENPP1;ENPP2;FAM227A;FAS;FCGRT;FTH1;FYB1;GTPBP1;HFE;HLA-DRB1;IGF1R;IL15;IL1A;IL23A;ILF2;IRAK1BP1;IRF8;LCP2;LIF;LOC100685196;LOC100688321;LOC102151615;LOC102151812;LOC102153553;LOC102154078;LOC102154270;LOC102154664;LOC102…	122	13536	273	18107	1	1
GO:0030154	cell differentiation	biological_process	6	AAMP;ABL1;ABL2;ALKBH5;ANGPT2;ANPEP;ARHGAP22;ATOH8;AXIN2;BCL7B;BTK;CAMK2G;CAND1;CCHCR1;CDC42;CDX2;CFAP54;CREBL2;CSK;CTGF;DHCR7;DPYSL2;ECSCR;EDF1;EHF;EID1;ELF1;ELF2;ELF3;ELF4;ELK1;ELK3;ELK4;ERF;ERG;ETS1;ETS2;ETV1;ETV3;ETV5;ETV6;EXT2;FER;FES;FGR;FLI1;FLT3;FRK;FXR1;FYN;GABPA;GAS7;GLRX2;GNA12;GNA13;GRB2;HCK;HES6;IGSF10;ILDR2;JAK1;KIAA1522;LOC102152878;LOC102154172;LOC491954;LOC610648;MGP;NDRG4;NEUROD1…	120	13536	155	18107	0.252905	0.92626
GO:0015629	actin cytoskeleton	cellular_component	10	ABL1;ABLIM2;ABRACL;ACACA;ADAM17;AHNAK;ANKRD23;APBB3;APOB;ARHGAP32;ARHGAP6;ARPC2;BAIAP2L1;BAIAP2;BCAR1;BFSP1;BIN1;LOC111091071;C11H9orf72;CASK;CDC42EP1;CDC42EP3;CDC42EP4;CENPQ;CFL1;CFL2;CNN3;CORO1A;CORO1C;CORO2A;CORO2B;CORO6;CRK;CTDP1;CTNNA1;CTNNA2;CTTNBP2NL;CTTNBP2;DAPK1;DDX58;DENND2A;ELL;ERAL1;FAM129B;FBRSL1;FER;FGD4;FGR;FHL2;FLNA;FMN2;FYB1;H1F0;HAX1;HSPB7;INTS6;IQGAP1;IVNS1ABP;KLHL17;KLHL2;KNTC…	119	13536	139	18107	0.00131372	0.129386
GO:0000981	RNA polymerase II transcription factor activity, sequence-specific DNA binding	molecular_function	5	ATF4;ATF5;BMPR1A;CC2D1A;CC2D1B;COR52H8;EHF;ELF1;ELF2;ELF3;ELF4;ELF5;ELK1;ELK3;ELK4;EPAS1;EPM2AIP1;ERF;ERG;ETS1;ETS2;ETV1;ETV3;ETV5;ETV6;FAM200A;FAM200B;FLI1;FOXA2;FOXA3;FOXC2;FOXJ1;FOXJ2;FOXJ3;FOXK1;FOXK2;FOXL1;FOXM1;FOXO1;FOXO3;FOXO4;FOXP1;FOXP2;FOXP4;FOXS1;GABPA;GTF2IRD1;GTF2I;HIF1A;JUNB;JUND;JUN;KIAA1958;KLF11;LOC100687429;LOC102151229;LOC111089969;LOC111091803;LOC449531;LOC491421;LOC607692;ME…	119	13536	154	18107	0.26777	0.92626
GO:0030335	positive regulation of cell migration	biological_process	9	ACTN4;ACVR1;ADRA2A;ANGPTL3;AQP1;ARHGEF39;SIT1;ATP8A1;BMP2;CARMIL1;CBLL1;CCAR1;CDH13;CEMIP;COL1A1;CORO1A;CPNE3;CSF1R;CXCL16;CYR61;DAB2;DAPK3;DRD1;EDN1;EGFR;ELP1;ELP3;ELP5;ELP6;EPHA1;F2RL1;F2R;FAM110C;FAM83H;FERMT3;FER;FGF1;FGFR1OP;FGR;FLT1;FOXF1;GLI1;GPER1;GRB7;GTSE1;HAS2;HGF;HRAS;HSPA5;IGF1R;INSM1;INSR;IRS2;ITGAV;LAMB1;LEF1;LGR6;LOC111095870;LOC488215;LRRC15;LYN;MIEN1;MMP14;MYLK;MYOC;NOTCH1;NTF3;…	118	13536	124	18107	1.514e-09	1.35265e-06
GO:0031965	nuclear membrane	cellular_component	12	AAAS;ADRA1A;AEN;AKAP6;AKIRIN1;ALG14;ALOX5;ANXA4;APEH;AQP1;BRAP;C10H2orf42;CCND2;CDC14B;CDK4;CEP131;CEP170;CEP70;CERS2;CHRNA10;NUP98;CMTM3;CNEP1R1;CTDNEP1;CUEDC2;DCTN5;DGKH;DMPK;DNAJC2;DTX2;ELF4;EPC1;FAM76B;FZR1;GCH1;GCHFR;GRK5;GTF3C3;GTPBP4;HACD3;HPN;HSD17B1;INA;IPO13;IPO4;TM9SF1;IPO5;JPT1;KLHDC2;KPNB1;LMNA;LOC111096734;LOC102152029;LOC111091955;LOC609484;MINDY3;MRGPRF;MRPL19;MRPS15;MRPS23;MX1;MY…	117	13536	124	18107	8.94611e-09	6.58223e-06
GO:0005667	transcription factor complex	cellular_component	7	ABT1;AJUBA;ALX1;ALX4;ANKRD1;ARNT2;ARNTL2;ARNTL;ASCC1;ATF5;ATF7IP;CDK2;CDK4;CLOCK;CREM;CTBP1;CTNNB1;DACH1;E2F2;E2F3;E2F4;E2F5;E2F6;E2F7;E2F8;ELMSAN1;EP300;EPAS1;ETS1;EYA3;FOS;GATA2;GATA3;GATA4;GATA5;GATA6;HAND2;HAX1;HCLS1;HDAC9;HES6;HNF1A;HNF1B;HOXA10;HOXA11;HOXA9;JUNB;JUND;JUN;KAT5;KDM1A;LDB1;LDB2;LEF1;LMO4;LOC102151229;LOC449531;MAFB;MED17;MED23;MED27;MED7;MEF2A;MEF2B;MEIS1;MLXIPL;MTA2;NFATC4;NP…	117	13536	139	18107	0.00509789	0.309496
GO:0004672	protein kinase activity	molecular_function	7	AAK1;AATK;ADCK1;BCKDK;BRAF;BUB1;CAMK2D;CAMK2G;CASK;CCL5;CCL8;CCND1;CDK12;CDK13;CDK17;CDK19;CDK2;CDK8;CDKL5;CLK4;CSNK1D;CSNK1G3;DAPK2;DCLK1;DYRK1A;EPHA1;ERBB3;ERCC2;ERN1;ERN2;FASTKD1;FASTKD2;FASTKD3;FASTKD5;GAK;GTF2H3;GUCY2C;HIPK1;HIPK2;HIPK3;IRAK2;KALRN;KSR1;LIMK1;LIMK2;LMTK2;LMTK3;LOC100682773;LOC102154115;LOC479761;LOC489591;LRRK1;MAP2K5;MAP3K11;MAP3K4;MAP4K4;MAPK11;MAPK9;MAPKAPK2;MINK1;LOC1110…	116	13536	132	18107	0.000147371	0.027929
GO:0008283	cell proliferation	biological_process	4	ANXA7;APC2;APC;APPL1;APPL2;ASCC3;AXIN2;BAK1;BCL2L1;BIN1;LOC111091071;BOP1;BYSL;C15H16orf87;CD70;CD74;CDK5RAP3;CDV3;COL4A3BP;COL4A3;COPS2;CSF1R;CUL1;CUL5;DACH1;DAZAP1;DCTN2;E2F8;ECD;EGFR;ENPEP;ERBB4;ERCC1;ERCC2;FAM83B;FAM83D;FBXL7;FBXW8;FER;FPGS;FURIN;GLI2;GNAI2;GNB1;GNG2;GOLPH3;GRHL2;HLCS;HOXB4;HRAS;IRF2;IRS2;KAT2A;KDM1A;LARP1;LIG4;LOC100855460;LOC102151796;LOC106557930;LRP2;MAP3K11;MCM10;MCM7;MD…	116	13536	133	18107	0.000303801	0.0481005
GO:0000977	RNA polymerase II regulatory region sequence-specific DNA binding	molecular_function	10	ACTN4;AEBP1;ALX1;ALX4;ARID3A;ASCL2;ASCL3;ATF1;ATF4;ATF5;ATF6;BARX1;BCL6B;BHLHA15;CDX2;CNBP;CREB3L3;CUX2;DBP;DLX2;E2F7;EAF2;EBF4;EGR1;EHMT2;ETV3;ETV5;FOXF1;FOXK1;GATA2;GATA3;GATA4;GATA5;GATA6;GATAD2A;HAND2;HES6;HOXD8;HOXD9;IKZF3;IKZF5;IRF2;KAT2B;LMX1A;LOC100685225;LOC100685630;LOC106558942;LOC100856587;LOC100856607;LOC102151838;LOC102155480;LOC106559228;LOC111097267;LOC484262;LOC489024;LOC491174;L…	116	13536	150	18107	0.265663	0.92626
GO:0007275	multicellular organism development	biological_process	5	ANKRD11;ARVCF;C20H19orf57;CAMK2G;CCDC120;CDK2;CHURC1;DACH1;DDX1;DKK2;DOPEY2;DPYSL2;EBF1;EBF3;EBF4;EDF1;EYA2;EYA3;EYA4;FLII;FMN2;FZD10;GAS7;GTF2I;HIVEP1;HIVEP2;HIVEP3;HOXA4;IGSF10;INVS;KCNMB4;LDB1;LOC100688321;LOC100856622;LOC102151229;LOC102153535;LOC102153756;LOC102155086;LOC102155379;LOC102156194;LOC102156686;LOC106557917;LOC106557930;LOC106559890;LOC111093862;LOC111094798;LOC607625;LOC607692;L…	114	13536	179	18107	0.999645	1
GO:0043065	positive regulation of apoptotic process	biological_process	9	ABL1;ACIN1;ADAMTSL4;AIFM2;ALDH1A2;ALDH1A3;ANKRD1;APBB1;APBB2;ARHGEF7;ATF4;ATG7;BARD1;BCL2A1;BCL2L11;BCL2L1;BIN1;LOC111091071;BMP2;BMP4;BMP7;C1QBP;CAMK1D;CCAR2;CLIP3;CLU;CTNNB1;CTNNBL1;DAB2IP;DAPK3;DCUN1D3;DDX20;DFFA;DNAJA1;DUSP6;ECT2;EIF5A;ENDOG;ERCC3;FLCN;FOXO1;FRZB;GADD45A;GADD45B;GADD45G;GPLD1;HOXA5;IFIT2;IGFBP3;IL6;ING2;ING3;ING4;INPP5D;IP6K2;IRF5;ITGA6;ITGB1;ITGB3BP;KLF11;LATS1;LATS2;LOC1021…	113	13536	133	18107	0.00305779	0.218553
GO:0005578	proteinaceous extracellular matrix	cellular_component	5	ADAMTS10;ADAMTS12;ADAMTS14;ADAMTS16;ADAMTS17;ADAMTS19;ADAMTS2;ADAMTS3;ADAMTS4;ADAMTS5;ADAMTS6;ADAMTS7;ADAMTS8;ADAMTS9;ADAMTSL1;ADAMTSL3;ADAMTSL5;ALPL;ASPN;BGN;COCH;COL11A1;COL15A1;COL16A1;COL17A1;COL18A1;COL24A1;COL26A1;COL6A1;COL6A2;COL6A3;COL6A5;COL6A6;CRISPLD2;CTGF;CTHRC1;CYR61;DCN;DGCR6L;ECM2;ELN;EMID1;EMILIN1;FBLN1;FBN3;FGF1;FMOD;GFOD2;GLG1;GPC1;GPC2;GPC3;GPC4;GPLD1;HAPLN1;HAPLN3;HAPLN4;HSD1…	112	13536	157	18107	0.860022	0.992083
GO:0019904	protein domain specific binding	molecular_function	5	ACSL3;AIDA;ANGEL1;ARFIP1;ARFIP2;ARHGEF4;ATN1;BHLHE40;CABYR;CALM3;CAPG;CASP2;CDK2;CENPJ;CEP250;CEP68;CHMP1A;CHMP1B;CHMP2A;CHMP2B;CNOT9;CNTLN;CNTROB;CSNK2B;CTBP1;DDX6;DICER1;DVL2;DYNLL1;E2F4;EHD2;EPB41L5;ERCC1;ESRRA;ETV6;EZR;FAF1;FOXA2;FOXA3;GSN;LOC102154209;GUSB;HGS;HMGB2;HNRNPM;HOMER3;HSPA5;ICA1L;ICA1;ID3;IGBP1;IKBKG;IQGAP1;KCNN2;KPNB1;LAMP1;LAMP2;LIN7B;LOC102151229;LOC102156352;LOC106558262;LOC1…	111	13536	136	18107	0.0367864	0.910531
GO:0007283	spermatogenesis	biological_process	7	ACE;ACOX1;ACVR2A;ADAMTS2;ALKBH5;APOB;ARID4A;ARID4B;ARNTL;ASPM;ASZ1;ATRX;B4GALNT1;BAG6;BCAP31;BCL2L11;BCL2L1;BRCA2;CCDC136;CCNI;CD55;CDK16;UBA1;CELF3;CETN2;CFAP54;CIP2A;CLOCK;CREM;CRTAP;CYP26B1;DAZAP1;DNAJA1;DNMT3A;DPCD;ERCC1;FOXA3;GAL3ST1;GAMT;GGT1;GLI1;GOLGA3;HERC4;HERPUD2;HOXA10;HOXA11;HOXA9;HSF1;HSF2BP;HSF2;IFT81;IMMP2L;INPP5B;JAG2;KATNAL1;KDM2B;KIAA1211L;TSGA10;KIT;LGR4;LIMK2;LOC102151385;LOC…	109	13536	153	18107	0.863392	0.995558
GO:0043209	myelin sheath	cellular_component	5	ACO2;ACTR1A;ALB;ARF6;ATP1A3;ATP1B1;ATP6V1A;ATP6V1B2;CA13;CA2;CANX;CCT2;CCT3;CCT5;CKMT1A;CLTC;CNP;CNRIP1;CNTN1;CNTN2;CNTNAP1;CRYAB;DLAT;DLD;DLST;DNM1;DPYSL2;EHD1;EHD3;ENO2;ERBB2;EZR;FSCN1;GDI2;GFAP;GNAO1;GNB1;GNB2;GNB4;GNB5;GPI;HSP90AA1;HSPA2;HSPA5;HSPA9;IDH3A;IMMT;INA;LOC102152873;LOC106557476;LOC111097407;LOC479815;LOC479901;LOC488636;MDH1;MPZ;MSN;MYH14;MYO1D;NAPA;NAPB;NAPG;NDRG1;NDUFA10;NDUFS1;…	108	13536	116	18107	2.80068e-07	0.000134734
GO:0010628	positive regulation of gene expression	biological_process	8	ACTG2;ACVR1B;ADM2;AGR2;ALDH1A2;ANK2;APOB;BRAF;C1QTNF1;CALR;CAV1;CD34;CD3E;CDH3;CDK6;CNTN1;CSF1;CTSH;CUX2;CYP26B1;DLL4;DNMT1;DNMT3B;DTNBP1;EPB41L4B;EPHX2;ERP29;EZR;FBLN1;FGFR4;FN1;FUBP1;GAS6;GJA1;HFE;HGS;HMGB2;HNRNPU;HOXD3;HPN;IL18;IL7R;IQGAP3;ITGB3;ITGB8;KDM5B;KDM6A;KRAS;LOC106557595;LOC609484;MAP2K1;MAPK11;MAPK8;MAPK9;MED1;MEF2C;MSN;MST1;NFIL3;NKX3-1;NR0B2;NTRK2;OLFM1;OSR2;P2RX7;PDCD10;PDCD5;PID…	108	13536	125	18107	0.00107008	0.113428
GO:0004871	signal transducer activity	molecular_function	4	ATP2C1;AXIN1;BCAR1;BST2;C7H18orf32;CANT1;CBLB;CBLC;CBL;CC2D1A;CTNNB1;CXXC5;ECM1;ECT2;EEF1D;FAM126A;FLNA;GAB1;GJA1;GNA12;GNA13;GNA14;GNA15;GNAI1;GNAI2;GNAI3;GNAL;GNAO1;GNAQ;GNAT2;GNB1;GNB2;GNG10;GNG11;GNG12;GNG14;GNG2;GNG4;GNG5;GNG7;GNGT2;GULP1;HMOX1;IRS1;IRS2;ITGB3BP;JUP;KLB;KL;LOC100686682;LOC106559503;LOC490969;LSP1;MAGI2;MAPKAPK2;MAPKAPK3;MAVS;MIB2;MIER1;MUL1;NDFIP1;NDFIP2;PLCB2;PLCB3;PLCB4;PL…	107	13536	125	18107	0.00229453	0.180593
GO:0016324	apical plasma membrane	cellular_component	6	ABCA7;ABCB4;ADAM17;AKR1A1;AMOTL1;AMOTL2;ANO1;ANXA13;ANXA1;AP2A1;AQP1;AQP5;ATP1B1;ATP1B2;ATP2B1;ATP6V1A;ATP8B1;CA4;CAV1;CD55;CDH2;CFTR;CHRNA7;CLDN1;CLDND1;CNTFR;CUBN;DLL1;DPP4;DRAM2;DSTYK;EMP2;ENPEP;EPCAM;ERBB2;F2RL2;FN1;FZD3;GIF;GJA1;HYAL2;IL6R;ITGB3;ITPK1;JAG1;LOC102156359;LOC111095132;LOC489640;LOC607978;LRP2;MAL2;MARVELD2;MPDZ;MSN;MYO7A;NAALADL1;NOTCH1;NRG1;OSMR;P2RX2;PDE4D;PFKM;PKHD1;PLD1;PLE…	107	13536	149	18107	0.823197	0.972031
GO:0008022	protein C-terminus binding	molecular_function	5	ABL1;AGO2;AP2A1;ATP1B1;ATP2A2;ATXN2;BCL10;BLOC1S2;CACNA1B;CALCOCO1;CDC20;CDK7;CEP120;CEP135;CEP250;COIL;CORO1A;CTGF;CTNNB1;DAB2;DGKZ;DLG1;DLG2;DLG4;DYNLL1;ECM1;EP300;ERBB2;ERCC1;ERCC2;ERCC3;ERCC4;ERCC6;FBLN1;FBLN5;FIGN;GOPC;GRIP1;HIC2;HOMER3;HRAS;HSPG2;LOC106558295;ITGB3BP;KPNA3;KSR1;LIG4;LOC102152056;LOC481228;LOC489420;MAGI1;MAP2K1;MDC1;MED12;MID1IP1;MKI67;MPDZ;MSH2;MYO1C;NCF2;NCL;NEFL;NEIL1;OP…	106	13536	120	18107	0.000176189	0.031039
GO:0051260	protein homooligomerization	biological_process	9	ALAD;ANXA6;ATL1;ATL2;ATL3;BAX;BCL10;BID;C1QTNF1;C1QTNF2;C1QTNF7;CAV1;CCDC88C;CEP57;CHMP2A;CHMP4B;CLDN1;CLDN3;CRYAB;DERL1;DGKD;DPYSL3;ECT2;EHD3;EHD4;EIF2AK3;FGFRL1;FIS1;CLDN15;FLOT1;GCH1;GPHN;HMOX1;IDE;IGHMBP2;IKBKE;KCNA1;KCNA3;KCNA5;KCNA6;KCNB1;KCNC4;KCND1;KCNF1;KCNG1;KCNG3;KCNS3;KCTD10;KCTD11;KCTD12;KCTD13;KCTD14;KCTD15;KCTD16;KCTD17;KCTD18;KCTD1;LOC111096933;KCTD21;KCTD2;KCTD3;LOC111094603;KCTD…	105	13536	150	18107	0.92311	0.99779
GO:0043123	positive regulation of I-kappaB kinase/NF-kappaB signaling	biological_process	10	ABL1;AJUBA;ANKRD17;ATP2C1;BCL10;BIRC2;BRD4;BST2;C7H18orf32;CANT1;CARD11;CASP8;CC2D1A;CCDC22;CD36;CD40;CFLAR;CTH;CTNNB1;CXXC5;ECM1;ECT2;EEF1D;F2RL1;F2R;FADD;FLNA;GJA1;GPRC5B;HMOX1;IKBKE;IKBKG;IRAK1;IRAK4;LOC100855825;LOC102153861;LTF;LURAP1L;LURAP1;MAP3K14;MAP3K3;MAP3K7;MAVS;MIB2;MID2;MIER1;MTDH;MUL1;MYD88;NDFIP1;NDFIP2;NOD1;NOD2;NUP62;IL4I1;PELI1;PLEKHG5;PLK2;PPM1A;PPP5C;PRKCB;PRKCE;PRKD1;PRKN;RE…	104	13536	117	18107	0.000111868	0.0222102
GO:0043231	intracellular membrane-bounded organelle	cellular_component	8	ABCA12;ABCA1;ABCA2;ABCA3;ABCA5;ABCA7;AGAP1;AHCYL2;AMBRA1;ANKRD13B;ANKS1B;AP1M2;AP1S2;AP2B1;AP3S2;AQP9;ARHGAP30;ATP13A1;ATP13A2;ATP13A3;ATP1A3;ATP2B1;ATP2B4;BRAF;C6H7orf43;CA13;CASZ1;CCZ1;CD40;CD86;CDK2;CLOCK;CLTA;CLTB;CMA1;COL8A1;COMMD7;CPSF4;DAPK2;DCP1A;DCP1B;DDX6;DNM1L;EIF5A2;EPN2;EVA1A;EXOC2;FAR1;G6PD;GLRX2;GOLPH3;GPRC5A;GRB14;GRN;GTPBP2;HSD17B11;IGF1R;INSR;KCNG1;LAMTOR4;LOC100855830;LOC102151…	104	13536	134	18107	0.256302	0.92626
GO:0000790	nuclear chromatin	cellular_component	13	APTX;ARID1A;ASXL1;BUD31;CALCOCO1;CBX7;CBX8;CCAR2;CDCA5;CHAF1A;CHAF1B;CHD4;CITED2;DDX11;DFFA;DFFB;DPF2;E2F1;E2F4;ESR1;ETV3;EZH2;FER;GABPA;GATA3;H2AFJ;H2AFV;H2AFZ;HAND2;HAT1;HMGB1;HMGB2;HNRNPK;IPO4;TM9SF1;IRF1;JUNB;JUND;JUN;KDM1A;LDB1;LOC102151229;LOC449531;LOC481514;LOC486424;LOC488268;LOC489024;LOC489372;MBD3;MEF2A;MIXL1;MSH6;MTA2;NACC2;NASP;NCOA1;NFATC1;NPM2;NR1D1;NRIP1;POGZ;POLR3D;POLR3GL;POLR3…	104	13536	137	18107	0.421287	0.92626
GO:0009897	external side of plasma membrane	cellular_component	6	ABCA1;ABCG1;ADA;ADGRA3;ADGRE1;ALCAM;AMOT;ANTXR2;ANXA5;ASTN1;ATP6AP2;B2M;B4GALT1;BMPR1A;CALR;CCR1;CCR5;CD14;CD19;CD274;CD276;CD2;CD302;CD34;CD36;CD3E;CD40LG;CD40;CD48;CD74;CD80;CD83;CD86;CD8B;CD9;CDH13;CDH5;CHRNA4;CHRNA7;CHRNB2;CLCN3;CXCL10;CXCL12;ECE1;ENOX2;ENPEP;FCER1A;FCER1G;FCGR1A;GPC4;HEG1;HFE;ICAM1;ICOSLG;IL12RB2;IL1RL1;IL2RB;IL6ST;IL6;IL7R;ITGA1;ITGA2;ITGA3;ITGA5;ITGA6;ITGAV;ITGAX;ITGB1;ITG…	104	13536	154	18107	0.98291	1
GO:0043025	neuronal cell body	cellular_component	6	AGFG1;ALCAM;APOB;APOD;ARHGEF2;ARHGEF7;ASIC2;ATXN10;BSN;CACNA1A;CACNA1B;CALB1;CAMK2D;CDK5;CIB1;CNTN2;CNTNAP2;COBL;CPNE5;CREB3;CRIPT;CYGB;DAB2IP;DENND1A;DLG2;DNER;DPYSL2;ELAVL4;EPHB2;FBXO31;FXR1;FZD3;GAL;GDPD5;GLRX2;GPHN;GRIA1;GRIA4;GSK3B;GTF2I;HCFC1;HPN;IAPP;IGSF9B;IL6ST;KCNA1;KCNIP1;KCNN1;KCNN2;KCNN3;PMVK;KIF5A;LRP6;LRRC45;RAC3;MAP1S;MAPK8IP2;MBP;MUL1;MYH10;MYO1D;NRSN1;NRSN2;NRXN1;P2RX7;PARD3;PEN…	103	13536	134	18107	0.325827	0.92626
GO:0030425	dendrite	cellular_component	7	ABI2;ACAD9;ADCY4;AGO2;AMIGO1;APOD;ARHGEF15;ATXN10;AZIN2;BSN;CACNA1A;CACNA1B;CALB1;CAPRIN1;CDK5;CHL1;CNTNAP2;CPEB3;CPEB4;CPT1C;CRIPT;DAB2IP;DENND1A;DLG2;DNER;DPYSL2;ELAVL4;ELFN1;EPHA4;EPHB2;FAM206A;FGF13;FXR1;FZD3;GCHFR;GLRX2;GNAI2;GNAO1;GNAQ;GPHN;GRIA4;GRIP1;HDAC6;HTT;IGSF9B;IGSF9;IL6ST;KCNA1;KCNE3;KCNIP1;LOC111097376;LOC478678;MAGEE2;MAGI2;MAP1S;MAPK8IP1;MAPK8IP3;MAPT;MLPH;MME;MTOR;NCS1;NF1;NPTN…	102	13536	126	18107	0.0631758	0.92626
GO:0003714	transcription corepressor activity	molecular_function	6	AEBP1;AEBP2;AJUBA;ANKRD1;ASXL1;ATF7IP;ATN1;BCOR;BHLHE40;BHLHE41;BRD7;C1D;C1QBP;CBFA2T2;CBFA2T3;CCAR1;CCND1;CDX2;CIR1;COPS2;CRYM;CTBP1;CTBP2;DAXX;DDIT3;DMAP1;DNMT3B;E2F7;E2F8;EID1;ELK3;ERF;GMNN;GON4L;GPS2;HDAC3;HDAC4;HDAC7;LOC106557909;HDAC9;HIPK2;HOMEZ;HR;HSBP1L1;JAZF1;KCTD1;LOC111096933;KDM5B;LDB1;LIMD1;LMCD1;LOC106557595;LOC111098541;LOC476317;LOC489420;LOC610615;LOXL2;MAP3K10;MEIS2;MTA1;NCOR1;…	101	13536	109	18107	1.32031e-06	0.000569463
GO:0046777	protein autophosphorylation	biological_process	9	ACVR1B;CAMK2A;CAMK2D;CAMK2G;CAMK4;CAMKK2;CDK12;CDKL5;CHEK2;CLK1;CLK2;CLK3;CLK4;CSF1R;CSNK1G3;DAPK1;DAPK3;DDR2;DYRK1A;EEF2K;EGFR;EIF2AK2;SULT6B1;EIF2AK3;EPHA1;EPHA4;EPHB1;EPHB3;EPHB4;ERBB2;ERBB4;FER;FGFR1;FGFR2;FGFR3;FGFR4;FLT1;GRK5;GRK7;RNF7;GSK3B;INSRR;INSR;IRAK1;IRAK3;KDR;KIT;LOC100682773;LOC111094605;LOC482687;LRRK2;MAK;MAP3K11;MAP3K12;MAP3K3;MAP3K9;MAPK15;MAPKAPK2;MAPKAPK3;MAPKAPK5;MARK2;MELK…	101	13536	116	18107	0.000849303	0.101172
GO:0016477	cell migration	biological_process	7	ABI2;ABL2;ADAMTS12;APC2;APC;ARF4;ARPC5;ASAP3;AVL9;BAMBI;CARMIL1;CARMIL2;CCDC88A;CD151;CD248;CD63;CDC42BPA;CDH2;CDK5;CLASP2;CLN3;CSK;CSPG4;CTGF;CTHRC1;CUL3;DEPDC1B;DOCK1;EFNA1;EFNB2;ELMO1;ELMO3;ENPEP;EPHB3;ERBB4;ERG;FAM83D;FGFR4;FGR;FMNL3;FSCN1;FUT8;FYN;GOLPH3;GPC6;GSK3A;GSK3B;HOXA5;ITGAV;JAK1;JAK2;JAK3;KCTD13;LAMC1;LCP1;LIMD1;LOC102151982;LOC111092837;LYN;MMP14;MYO18A;NCK2;NDE1;NDEL1;NFATC2;PALLD…	101	13536	119	18107	0.00534466	0.309496
GO:0043161	proteasome-mediated ubiquitin-dependent protein catabolic process	biological_process	10	ARNTL;ARRB1;BFAR;BIRC2;BUB3;C7H18orf25;CDC34;CLOCK;CRBN;CUL4A;DDB1;DDIT3;DZIP3;ERCC8;FBXL19;FBXL22;FBXO45;GID4;GSK3A;GTSE1;HECTD3;KAT5;KBTBD4;KCTD10;KCTD13;KCTD17;KEAP1;KLHL20;KLHL42;LOC100856028;LOC102152016;LOC102152029;LOC102152069;LOC102156128;LOC106557870;LOC111095077;MTA1;NEDD4L;NFE2L2;NHLRC1;NSFL1C;PCBP2;PRR13;PML;PPP2CB;PPP2R5C;PRKN;PSMB5;PSMC5;PSMD12;PSMD1;PSMD2;PSMD4;PSMD6;PSMD7;PSMD8;R…	100	13536	116	18107	0.0019176	0.160975
GO:0045087	innate immune response	biological_process	5	ABL1;ABL2;ADAM15;ANKHD1;EIF4EBP3;ANKRD17;APP;B2M;BCL10;BMX;BST2;BTK;CD14;CD55;CLEC5A;CLEC7A;CSK;CYBA;CYBB;DAB2IP;DDX58;EIF2AK2;SULT6B1;ELF4;FBXO9;FCER1G;FER;FES;FGR;FRK;FYN;HCK;HMGB1;HMGB2;IFIH1;IPO7;ITK;JAK1;JAK2;JAK3;JCHAIN;LBP;LCN2;LOC100855825;LOC102152029;LOC488347;LOC611538;LYN;MAVS;MID2;MSRB1;MX1;MX2;NFKB2;NLRC5;NOD2;OTULIN;PCBP2;PRR13;PML;PPP1R14B;PRKD1;PTK2B;PTK2;RELA;RELB;REL;RIPK2;S100…	99	13536	125	18107	0.147647	0.92626
GO:0016607	nuclear speck	cellular_component	14	ACIN1;AFF2;ALKBH5;ALYREF;ATPAF2;ATXN2L;BCLAF1;C31H21orf58;CD2BP2;CDC5L;CDK12;CHTOP;CIR1;DDX39B;DDX46;DGKQ;DYRK1A;EFTUD2;ELL;EP400;EPAS1;FAM206A;FTO;GLI2;GLIS2;GON7;HIF1A;HIPK1;KIAA1614;LOC100688360;LOC102151540;LOC102152414;LOC102154270;LOC102154338;LOC102155288;LOC102156665;LOC106557923;LOC111090991;LOC111092704;LOC111093732;LOC111094324;LOC111096744;LOC609094;LOC610648;LUC7L3;MAGOH;MAML1;MAML2;…	99	13536	169	18107	0.999999	1
GO:0006915	apoptotic process	biological_process	7	AIMP2;APIP;BABAM2;BCL2L14;BCL7B;BCL7C;BCLAF1;BIRC6;BNIP1;BNIP2;C33H3orf38;CAAP1;CASP10;CASP12;CASP14;CASP4;CASP6;CASP8;CASP9;CIAPIN1;CIB1;CIDEA;CIDEB;CLIC4;CLPTM1L;CSNK2A2;CUL1;CYFIP2;DAD1;DAP3;DAPK2;DDIAS;DNASE1;DYNLL1;EBAG9;ECSCR;EFNA5;EMC4;EP300;ERCC2;ERCC3;FAF1;GAS2;GLRX2;GULP1;HIP1R;HIP1;ING4;IRF1;ITGB3BP;LOC100682773;LOC100684429;LOC100688940;LOC100856198;LOC102152873;LOC102152878;LOC102154…	97	13536	116	18107	0.0149567	0.601538
GO:0042127	regulation of cell proliferation	biological_process	5	ABL1;ABL2;BCL6;BID;BMX;BRAF;BRCA2;BTK;CCDC88A;CDCA7;CELA1;CHEK1;CHST11;CREB3;CSK;CXCL10;CXCL8;DHCR7;DUSP22;E2F4;EZH2;FANCA;FAS;FER;FES;FGR;FRK;FYN;GUCY2C;HCK;HHEX;HP1BP3;ITK;JAG1;JAG2;JAK1;JAK2;JUNB;JUND;JUN;LAMA5;LGR5;LOC100688321;LOC102154078;LOC102154267;LOC102156677;LOC102156915;LOC106557449;LOC106558987;LOC111097376;LOC609235;MAFG;NFKBIA;NGFR;NOS2;NR5A2;PBX1;PDS5B;PIAS1;PKD2;PLA2G4A;PLAU;PLC…	97	13536	135	18107	0.811326	0.972031
GO:0007507	heart development	biological_process	8	ACVR2B;ADAM19;AP1B1;BCOR;BICC1;BORCS8;CALCRL;CASP3;CASP7;CC2D2A;CCNA2;BBS7;COL3A1;CRKL;CXADR;DNAAF3;DNAH11;DRC1;ECE1;EDN1;EDNRA;EP300;EPOR;ERBB2;ERBB4;FBN1;FGF19;FOXJ1;FOXL1;FREM2;GAB1;GATA2;GATA3;GATA4;GATA5;GATA6;GLI2;GNAQ;GRK2;GYS1;HAND2;HDAC9;HEXIM1;HOPX;HSPB11;ID1;ID3;IFT74;JMJD6;KCNJ8;LOC111094296;LOX;MAP2K1;MAP2K2;MBD3;MED12;MEF2C;MIXL1;MOSPD3;MTERF4;MTHFD1;NF1;NFATC4;NKX3-1;NRP2;NTRK3;OSR…	96	13536	112	18107	0.00347975	0.240468
GO:0070374	positive regulation of ERK1 and ERK2 cascade	biological_process	12	ABCA7;ABL1;ACKR3;ADCYAP1;ALOX15;ANGPT1;ARRB1;ATP6AP1;BMP2;BMP4;BMPER;BRAF;C5AR1;CAMK2D;CAVIN3;CCL17;CCL20;CCL23;CCL24;CCL25;CCL7;CCL8;CCR1;CD36;CD44;CD74;CHI3L1;CIB1;CSF1R;CTGF;CX3CL1;DNAJC27;DSTYK;EGFR;ERBB4;F2RL1;F2R;FBXW7;FGF18;FGF19;FGF21;FGF2;FGFR3;FGFR4;GAREM1;GAS6;GCG;GLIPR2;GPER1;HAVCR1;HMGB1;HRAS;ICAM1;JUN;KDR;LOC102153861;LOC102155886;LOC102156359;LOC474898;LOC480601;LOC480603;LOC488215…	96	13536	124	18107	0.284379	0.92626
GO:0043005	neuron projection	cellular_component	6	ABI1;AHCYL2;ANKRD27;ARHGEF7;ARPC2;ASIC2;ATF4;BAIAP2;BRAF;CALB1;CAMK2D;CAMK2G;CDH13;CPEB1;CPEB2;CPEB3;CPEB4;CPNE5;CXADR;CYFIP2;CYGB;DLG2;DPYSL2;FAM107A;FAS;GABBR2;GPR1;HMGB1;HNMT;INPP5K;IQGAP1;KCNAB2;KIF3A;KIF5A;KIF5B;KIF5C;KLC3;LIMK1;LIN7C;LOC100688321;LOC111093016;LOC609235;LYPD6;MAP2;MAPK9;MAPT;MARK4;NCDN;NF2;NGFR;NSMF;PACRG;PARK7;PRKN;PRR12;PTEN;PTGS2;PTPRF;RAB13;RAB21;RAB39B;RAP1A;RAP1GAP2;RA…	96	13536	128	18107	0.521872	0.92626
GO:0006511	ubiquitin-dependent protein catabolic process	biological_process	9	BAG6;BAP1;CHFR;ZNF605;COPS3;CUL2;CUL7;CUL9;CYLD;DTL;FBXL12;FBXO21;FBXO25;FBXO32;FBXO8;HERPUD1;LOC102152203;NPLOC4;PSMA1;PSMA2;PSMA3;PSMA5;PSMA6;PSMA7;PSMD11;PSMD13;PSMD3;PSMF1;RANBP1;RNF168;RNF20;SIAH2;SKP2;SMURF2;SQSTM1;STUB1;TOLLIP;TP53INP2;TRPC4AP;TTC3;UBA6;UBE2C;UBE2D1;UBE2D3;UBE2G1;UBE2G2;UBE2H;UBE2N;UBE2S;UBE4A;UBE4B;UCHL1;UCHL3;UCHL5;UFD1;UHRF2;USP10;USP11;USP12;USP13;USP14;USP15;USP16;USP…	95	13536	104	18107	1.47876e-05	0.00442104
GO:0005802	trans-Golgi network	cellular_component	10	AMPH;AP2B1;AP4M1;ARFGEF1;ARFGEF2;ARFRP1;ARL1;ATG9A;ATP2C1;ATP7A;ATP7B;ATP8A1;ATP8A2;ATP9A;ATP9B;ATXN2;AZIN2;BICD1;BIRC6;BSN;CA4;CDH1;CHST2;CLASP2;CLTB;CLTCL1;CLVS1;CNST;CPD;DBNDD2;SYS1;FAM109A;FAM109B;FAM91A1;FNBP1L;FNBP1;FURIN;GBF1;GCC2;GCNT1;GGA2;GGA3;GOLGA1;GOLPH3;GPER1;GSAP;IGF2R;INPP5K;KIAA1324;KLHL20;LOC102151745;LOC442967;LRRK2;M6PR;MARCH4;MARCH9;MYO18A;NBEA;NCK1;NCK2;NMNAT2;OCRL;OPTN;PCSK…	95	13536	105	18107	4.0958e-05	0.0102461
GO:0017137	Rab GTPase binding	molecular_function	9	ACAP2;ALS2;ANKFY1;ANKRD27;AP1G1;AP3M1;ATP6AP1;BICD1;BICD2;BICDL1;BICDL2;C11H9orf72;CHML;OPN3;CHM;DMXL2;ERC1;EVI5L;EVI5;EXPH5;GAS8;GOLGA5;GRTP1;HACE1;HPS6;KIF16B;LLGL1;LLGL2;LOC102152829;LOC102154740;LOC480654;MICAL1;MICAL3;MICALL1;MLPH;MYRIP;NDRG1;ODF2;OPTN;PDE6D;PLA1A;ADPRH;RAB11FIP1;RAB11FIP2;RAB11FIP3;RAB11FIP4;RAB11FIP5;RAB3GAP1;RAB3GAP2;RABGAP1;GPR21;RABGAP1L;RABGEF1;RABGGTB;RBSN;RGP1;RHOBTB…	95	13536	113	18107	0.0118846	0.529509
GO:0018105	peptidyl-serine phosphorylation	biological_process	9	AKT1;AKT2;AKT3;BRSK2;CAB39;CAMK2A;CAMK2D;CAMK2G;CAMK4;CDC7;CDK1;CDK2;CLK1;CLSPN;CSNK1A1;CSNK1D;CSNK1E;CSNK1G2;CSNK1G3;DAPK2;DCLK1;DMPK;DYRK1A;GAS6;GRK2;GSK3B;HIPK2;HIPK3;ILK;LATS1;LATS2;LOC111097734;LRRK2;MAP3K10;MAP3K12;MAPK13;MAPK14;MAPK1;MAPK7;MAPK8;MAPK9;MAPKAPK2;MAPKAPK3;MAPKAPK5;MAST1;MAST2;MAST3;MAST4;MKNK1;MKNK2;LOC106560107;MORC3;MTOR;PAK2;PDGFB;PDK3;PDPK1;PKD1;PKN1;PKN2;PKN3;PLK1;PRKACA…	93	13536	101	18107	7.4539e-06	0.00251982
GO:0001525	angiogenesis	biological_process	10	AAMP;ACKR3;ACVRL1;ADGRG1;ADM2;ANGPT2;ANGPT4;ANGPTL4;ANPEP;ARHGAP22;BCAS3;C1GALT1;CALCRL;CAV1;CLIC4;CTGF;DAB2IP;ECSCR;EFNA1;EGF;EIF2AK3;ELK3;ENPEP;EPAS1;EPHB1;EPHB2;EPHB3;EREG;ESM1;FGF18;FGF2;FGFR1;FZD5;GJA5;HAND2;HEY1;HIF1A;HOXA3;HOXA7;HOXB3;HS6ST1;IL18;ITGAV;JAM3;JUN;KLF5;MAPK14;MCOLN1;PNPLA6;MED1;MEIS1;MEOX2;MYH9;NCL;NOS3;NOV;NOX5;NRP2;OVOL2;PIK3CA;PKNOX1;PLCD1;PLCD3;PLXDC1;POFUT1;PRKD1;PRKX;PT…	93	13536	110	18107	0.00928469	0.453644
GO:0030027	lamellipodium	cellular_component	6	ABI1;ABI2;ABLIM1;ABLIM3;ACTG2;ACTN1;ACTR3;AIF1;AJUBA;ALS2;AMOTL1;AMOT;APBB1;ARAP3;ARHGAP31;ARHGEF7;ARPC3;ARPC5;ARPIN;BCAR1;BRK1;CAPZB;CARMIL1;CCDC88A;CDH1;CDH2;CDK5;CIB1;CORO1A;CORO1B;CTNNA1;CTNNA2;CTNNA3;CTNNB1;CTTN;DAG1;DGKZ;DPP4;DPYSL3;DYSF;ENAH;EVL;FAP;FAT1;FER;FGD4;FLOT1;FLOT2;FSCN1;GSN;LOC102154209;HAX1;ILK;IQGAP2;ITGB1BP1;LOC608648;LOC609235;MYLK;NF2;PDXP;PIK3CA;PIP5K1A;PKD2;PKN2;PLCG1;PLE…	92	13536	101	18107	2.73071e-05	0.00713871
GO:0005911	cell-cell junction	cellular_component	4	ACTN4;ACTR3;ADAM17;ADD3;ADGRL3;AHI1;AJUBA;AKT1;APP;CARMIL2;CASK;CD2AP;CD2;CD3E;CD53;CDH1;CEP41;CLIC4;COL13A1;CORO1A;CSK;CTNNB1;CTNND1;CXADR;DAG1;DLG1;DSG1;EPB41L3;FAT1;FGFR4;FLRT2;FLRT3;FRS2;FSCN1;FZD4;GRB2;GRHL2;HEG1;HPN;IGSF5;IQGAP3;ITGA5;ITK;JCAD;KIRREL1;KIT;LCP2;LIN7A;LIN7B;LIN7C;LOC102157248;MAGI1;MAGI3;MAP2K2;MYO1E;NCK1;NECTIN3;NPHP1;NPHP4;P2RX7;PACSIN2;PAK1;PARD3;PCDH12;PDZD11;PDZD2;PIK3R1…	92	13536	110	18107	0.0173929	0.651349
GO:0004930	G-protein coupled receptor activity	molecular_function	6	ADGRA2;ADGRA3;ADGRB1;ADGRB2;ADGRB3;ADGRD1;ADGRE1;ADGRE5;ADGRF1;ADGRF3;ADGRF5;ADGRG1;ADGRG2;ADGRG6;ADGRL1;ADGRL2;ADGRL3;ADGRL4;ADGRV1;APLNR;CELSR1;CELSR2;CELSR3;CMKLR1;EMR4;F2RL1;FFAR1;FFAR3;FFAR2;FRZB;FZD10;FZD1;FZD2;FZD3;FZD4;FZD5;FZD7;FZD9;GPER1;GPR119;GPR135;GPR142;GPR146;GPR153;GPR157;GPR158;GPR161;GPR162;GPR176;GPR19;GPR1;GPR39;GPR4;GPR63;GPR65;GPR68;GPR75;GPR83;GPR85;GPR88;GPRC5A;GPRC5B;GPR…	92	13536	263	18107	1	1
GO:0051015	actin filament binding	molecular_function	7	ABL1;ACTN1;ACTN2;ACTN4;ACTR2;ACTR3;ADD2;AIF1L;AIF1;AJUBA;ANTXR1;ARPC1A;ARPC1B;ARPC2;ARPC3;ARPC4;ARPC5;BIN1;LOC111091071;BLOC1S6;CAPZB;CLASP2;CORO1A;CORO1B;CORO1C;CORO2A;CORO2B;CORO6;CTNNA1;CTNNA2;CTNNA3;CTNNAL1;DBNL;EGFR;EZR;FLNA;FLNC;FMNL1;FRG1;FSCN1;GAS2L2;GAS7;IQGAP2;KLHL17;LASP1;LCP1;LIMA1;LOC106558660;LOC111097376;MACF1;MAP1S;MARCKS;MYH10;MYH11;MYH14;MYH7;MYH9;MYL4;MYO18A;MYO1B;MYO1E;MYO7A;N…	91	13536	110	18107	0.0306882	0.820188
GO:0030424	axon	cellular_component	7	ADAM22;ADGRL3;ALCAM;APP;AQP1;AZIN2;BIN1;LOC111091071;BSN;CADM2;CALB1;CCSAP;CDK5;CNTNAP2;CORO1A;CPT1C;CTNNA2;DAB2IP;DCLK1;DPYSL2;DSCAM;DTNA;DVL1;EPHA4;EPHB1;EPHB2;FGF13;FKBP15;FXR1;FZD3;GAD2;GAP43;GARS;GDPD5;HDAC6;HOMER1;HTR2A;HTT;IGSF9;IQGAP1;IRX3;KATNB1;KCNA3;KCNAB2;LOC102152214;LOC491284;LPAR3;LRRK2;MAP3K12;MAPT;MME;MTPN;MUL1;MYH10;MYH14;MYO1D;NCAM2;NCS1;NF1;NRP1;NRP2;NTRK1;PPFIA1;PPT1;PSEN1;PT…	91	13536	110	18107	0.0306882	0.820188
GO:0004872	receptor activity	molecular_function	3	AMFR;NUDT21;AMOT;ANTXR2;ATP6AP2;ATRN;CADM1;CADM2;CADM3;CADM4;CD180;CD200;CEL;CUBN;CUL5;EXTL3;FAM227A;GFRA1;GFRA2;GFRA3;GRIA4;ITGB1;ITGB3;ITGB4;ITGB5;ITGB6;ITGB7;ITGB8;JMJD6;LOC102151615;LOC102151812;LOC102153553;LOC102154270;LOC102154664;LOC102155568;LOC102156502;LOC102156665;LOC102157331;LOC106558034;LOC106558374;LOC106558823;LOC106559437;LOC111090201;LOC111090312;LOC111091236;LOC111092180;LOC11…	91	13536	193	18107	1	1
GO:0006457	protein folding	biological_process	7	AARS;AIPL1;BAG2;CALR3;CALR;CANX;CCT2;CCT3;CCT4;CCT5;CCT6A;CCT7;CCT8;CDC37L1;CDC37;CWC27;DNAJA1;DNAJA3;DNAJB11;DNAJB4;DNAJB5;DNAJB6;DNAJC1;DNLZ;ERP27;ERP29;FKBP15;FKBP1B;FKBP2;FKBP8;GRPEL1;GRPEL2;HSCB;CCDC117;HSP90AA1;HSP90AB1;HSP90B1;HSPA9;HSPE1;LOC100684448;LOC100856782;LOC102151313;LOC102152612;LOC102156058;LOC102156762;LOC474539;LOC474798;LOC480059;LOC606772;MKKS;LOC102153017;NKTR;P3H1;P4HB;PD…	90	13536	97	18107	4.35986e-06	0.00165252
GO:0042981	regulation of apoptotic process	biological_process	8	ACIN1;ALX3;ALX4;ANP32E;APAF1;BCL2L13;BMP1;BMP2;BMP3;BMP6;C37H2orf88;CARD10;CARD11;CARD6;CASP10;CASP4;CASP8;CASP9;CFLAR;CIDEA;CIDEB;DAPK1;DAPK2;DEDD;DLG5;DNAJA3;DUSP1;EGR1;ESR1;ETS1;FBXO10;FRS2;FYN;GAS1;GDF11;GDF15;GDF6;GDF9;GLS2;HS1BP3;IFIH1;IKZF3;INHBA;INHBB;JAK2;LOC100688321;LOC100855618;LOC480926;LOC607768;LOC609484;LRP5;MAGED1;MAP4K4;MCL1;MINK1;LOC111096071;MITF;NGFR;NME4;NOD2;PAK1;PAK2;PHLPP…	89	13536	122	18107	0.717817	0.92626
GO:0008360	regulation of cell shape	biological_process	9	AKAP2;ANXA1;ANXA7;ARAP1;ARAP3;ARHGAP18;BAIAP2;BAMBI;BRWD1;BRWD3;BVES;C30H15orf62;C31H21orf2;CCL24;CCL2;CCL7;CDC42EP1;CDC42EP2;CDC42EP3;CDC42EP4;CDC42EP5;CDC42SE1;CDC7;COCH;CORO1A;CSF1R;CSNK1A1;CSNK1D;CSNK1E;CSNK1G2;CSNK1G3;DAPK3;DIAPH1;DLC1;DLG1;DMTN;EPB41L3;EPS8;EZR;FES;FGR;FMNL1;FMNL3;GAS7;GNA12;GNA13;HEXB;HPN;KDR;KIT;LIMD1;LOC111092837;LOC607207;MYL12B;MKLN1;MSN;MYH10;MYH9;PALMD;PALM;PHIP;PLEK…	88	13536	96	18107	2.14424e-05	0.00596003
GO:0044212	transcription regulatory region DNA binding	molecular_function	8	AK6;TAF9;ARID4A;ARID4B;ARID5A;ARRB1;ASH2L;ATMIN;BCOR;BRD7;CARM1;CBX4;CCNT1;CDK5RAP2;CRY1;MTERF2;CTNNB1;ELMSAN1;ERBB4;FOXA3;FOXC2;GABPB1;GABPB2;GATA3;GFI1;GLIS2;GLMP;HAND2;HIVEP1;HIVEP2;HIVEP3;HNF1B;HNRNPL;IKZF2;IKZF3;IKZF4;KAT7;KDM1A;KLF11;KLF15;MEF2C;MEN1;MSX2;MTERF3;NFYA;NFYB;OVOL2;PHB;PPARG;PRDM5;RAI1;RBBP5;RCOR1;RCOR2;RCOR3;REST;RFX3;RREB1;SALL4;SMAD7;SMARCA2;SOX6;SOX7;TAF2;TAF5;TAF7;TBL1X;TC…	88	13536	110	18107	0.12153	0.92626
GO:0043235	receptor complex	cellular_component	5	ACVR2A;ACVR2B;ADCYAP1R1;ADGRV1;ADRA2A;ADRB2;APP;CAPRIN2;DDR1;EGFR;ERBB2;ERBB4;FAM227A;FGFR1;FLT1;GPR119;GPR160;GPR63;IGF1R;IL4R;IMPG2;INSRR;ITGB4;ITPR2;ITPR3;LOC111098223;KCTD16;LEPR;LIFR;LOC102151615;LOC102151812;LOC102153553;LOC102154270;LOC102154664;LOC102155568;LOC102156502;LOC102156665;LOC102157331;LOC106558034;LOC106558374;LOC106558823;LOC106559437;LOC111090201;LOC111090312;LOC111091236;LOC…	88	13536	195	18107	1	1
GO:0050821	protein stabilization	biological_process	10	AAK1;AK6;TAF9;APOA1;ATP1B1;ATP1B2;ATP1B3;BAG3;BAG6;CALR;CDC37L1;CDC37;CHEK2;CHP1;CLU;COG7;CREB1;CREBL2;CRTAP;DNAJA3;DNLZ;DSC3;DSG1;DVL1;DVL3;EP300;FBXW7;FLNA;FLOT2;GAPDH;GNAQ;GOLGA7;GTPBP4;GTSE1;HCFC1;HPS4;IFI30;IGF1;LAMP1;LAMP2;LOC102152029;LOC106559694;RP9;MDM4;MORC3;MSX1;MUL1;NAA16;NLK;P3H1;PARK7;PDCD10;PEX19;PFN1;PHB2;PHB;PIK3R1;PIM2;PLPP3;PML;PPIB;PRKN;PTEN;RASSF1;RASSF2;SAV1;SMAD3;SMAD7;SOX…	87	13536	94	18107	8.42322e-06	0.00270148
GO:0006974	cellular response to DNA damage stimulus	biological_process	6	ALKBH7;ALKBH8;APBB1;ASH2L;BRCC3;BRD4;BRSK1;BTG2;CASP3;CDK16;UBA1;CDK2;CDKN2AIP;CHCHD6;CHD1L;CIB1;CTC1;CUL4A;CUL4B;DDX39A;DDX39B;ENDOD1;LOC485120;FANCG;FBXO45;FBXW7;FMN2;FOXO1;GNL1;IKBKG;IMMP2L;INIP;KIN;LOC479005;LOC488622;LOC489372;LOC609094;LOC609558;LYN;MACROD1;MAPK1;MAPKAPK2;MCM10;MCM7;MCTS1;MEN1;MNDA;NCOA6;NEK4;NFATC2;NSMCE2;NUPR2;OTUB1;PCLAF;PLK3;PSEN1;PSME4;RAD51;RASA2;ZBTB38;RASSF1;RBBP5;R…	87	13536	100	18107	0.0020352	0.169709
GO:0016887	ATPase activity	molecular_function	9	ABCA6;ABCE1;ABCF1;ABCF2;LOC106559817;ABCF3;AK6;TAF9;ASNA1;ATAD1;ATAD2B;ATAD2;ATF7IP;ATP13A3;ATP5J;CARNS1;CENPE;CLU;DNAH10;DNAH11;DNAH1;DNAH2;DNAH5;DNAH6;DNAH8;DYNC1H1;DYNC2H1;HLTF;HSP90AA1;HSPA5;INO80;KIF12;KIF13A;KIF13B;KIF14;KIF15;KIF16B;KIF1A;KIF1B;KIF1C;KIF20A;KIF20B;KIF21A;KIF21B;KIF22;KIF23;KIF24;KIF27;KIF2A;KIF2C;KIF3A;KIF3B;KIF3C;KIF7;KIF9;KIFC1;KIFC2;KIFC3;LOC100855783;LOC102151505;LOC11…	87	13536	108	18107	0.0977891	0.92626
GO:0071013	catalytic step 2 spliceosome	cellular_component	9	AQR;BCAS2;CACTIN;CDC40;CDC5L;CWC15;CWC27;DDX23;DDX41;DDX5;DHX35;DHX38;DHX8;EFTUD2;EIF4A3;ESS2;FRG1;GPATCH1;HNRNPA1;HNRNPA2B1;HNRNPA3;HNRNPF;HNRNPH1;HNRNPK;HNRNPM;HNRNPR;HNRNPU;ISY1;LOC100683228;LOC100686524;LOC102152493;LOC102156058;LOC102157224;LOC478183;LSM2;LSM3;LSM7;MAGOHB;MAGOH;PHF5A;PLRG1;PNN;PPIE;PPIL3;PPWD1;PRPF19;PRPF4B;PRPF6;PRPF8;RALY;RBM22;RBM8A;RBMX2;RBMX;SART1;SF3A1;SF3A2;SF3B1;SF3B…	86	13536	90	18107	1.54255e-07	8.12389e-05
GO:0015031	protein transport	biological_process	6	AP4S1;ARCN1;ARF3;ARF4;ASTN2;ATG3;C6H16orf62;CADPS;CALCRL;CCNA2;BBS7;CD3G;CHMP1B;CHMP7;COL1A1;COPZ2;DENND1B;DOPEY1;DOPEY2;EIF5A;ENY2;ERC1;EXOC4;EXOC6;FAM160A2;FMN2;GDI1;GDI2;GOLPH3;GOSR1;GPM6B;HOOK3;IST1;ITGB1BP1;KDELR1;KDELR2;KDELR3;KPNA3;LIN7C;LMAN2L;LMAN2;LOC102151415;LOC111097364;LRP1B;MIA3;MYH9;NACA;PLEKHA8;PPT1;PSEN1;RAB22A;RAB25;RAB3IL1;RAB4A;SPHAR;RAB5A;RAB6B;RAB9A;TCEANC;RAMP2;RAP1A;RHBDF…	86	13536	96	18107	0.000231257	0.0396241
GO:0000209	protein polyubiquitination	biological_process	11	AMFR;NUDT21;ANKIB1;ARIH1;ARIH2;BIRC2;BTRC;C7H18orf25;CBFB;CHFR;ZNF605;CUL3;DDB2;DTL;DZIP3;ERCC8;FBXL18;FBXL8;FBXO21;FBXO22;FBXO41;FBXO44;FBXO4;FBXW11;FBXW12;FBXW2;LOC106559510;HDAC6;HLTF;HUWE1;KLHL42;MARCH1;MARCH5;MARCH8;MGRN1;MYLIP;NHLRC1;PPIL2;PRKN;RC3H2;RNF111;RNF114;RNF115;RNF122;RNF125;RNF126;RNF138;RNF139;TRMT12;RNF144A;RNF144B;RNF145;RNF14;RNF166;RNF181;RNF19A;RNF19B;RNF20;RNF217;RNF24;RNF…	86	13536	99	18107	0.00238828	0.184399
GO:0007166	cell surface receptor signaling pathway	biological_process	7	ADCYAP1R1;ADGRA2;ADGRA3;ADGRB2;ADGRB3;ADGRD1;ADGRE1;ADGRE5;ADGRF1;ADGRF3;ADGRF5;ADGRG1;ADGRG2;ADGRG6;ADGRL1;ADGRL2;ADGRL3;ADGRL4;ADGRV1;BRD8;CALCRL;CBLB;CBLC;CBL;CD151;CD274;CD36;CD37;CD3D;CD3G;CD53;CD59;CD63;CD81;CD82;CD9;CELSR2;CELSR3;CLCF1;COL4A3;EDN1;EMR4;GCGR;GHRHR;GIPR;GLP1R;GPR157;GPR19;GPR75;GPR83;GPR88;IL17D;ITPKB;JMJD6;LOC484897;LOC610380;LY6E;MAGI1;MAPKAPK3;NPY1R;NPY2R;NUP62;IL4I1;PRLH…	85	13536	128	18107	0.986992	1
GO:0004252	serine-type endopeptidase activity	molecular_function	8	APEH;C1RL;C1R;C1S;C2;CELA1;CFB;CFD;CFI;CLPP;CMA1;CTRB2;CTRL;CTSH;DPP4;F11;F2;FAP;FURIN;HABP2;HGFAC;HGF;HPN;HTRA1;HTRA2;HTRA3;IMMP1L;IMMP2L;KLK1;KLK4;KLKB1;LOC100049001;LOC102154267;LOC102157317;LOC111091651;LOC111095525;LOC448801;LOC475521;LOC478196;LOC478220;LOC479649;LOC479668;LOC610373;LONP1;LONP2;MASP1;MASP2;MBTPS1;MST1;PAMR1;PARL;PCSK1;PCSK2;PCSK4;PCSK5;PCSK6;PCSK7;PLAT;PLAU;PLG;PREPL;PREP;P…	85	13536	133	18107	0.998053	1
GO:0000398	mRNA splicing, via spliceosome	biological_process	11	AQR;BCAS2;BUD31;CELF3;CWC15;DBR1;DDX39A;DDX39B;DDX46;DHX15;DHX16;DHX32;DHX38;DHX8;DQX1;FIP1L1;HELB;HNRNPA2B1;HNRNPH1;HNRNPM;HNRNPU;LOC100685900;LOC100686524;LOC478183;LOC610615;LSM2;LSM3;LSM5;LSM6;LSM7;LSM8;METTL14;METTL3;NCBP2;NONO;NOVA1;PCBP2;PRR13;PHF5A;PLRG1;PPIL3;PRPF31;PRPF40A;PRPF4;PTBP1;PUF60;RAVER1;FDX1L;RAVER2;RBM15B;RBM41;RBMX2;RBPMS2;RBPMS;RNPC3;RNPS1;SF1;SF3A3;SF3B2;SF3B3;SF3B5;SF3B6…	84	13536	87	18107	4.37713e-08	2.73746e-05
GO:0030496	midbody	cellular_component	5	AGBL5;TRNAA-AGC;ALKBH4;ANKRD54;ANXA11;ARL2BP;ARL3;ARL8A;ARL8B;ASPM;AURKB;TRNAD-GUC;BIRC5;BIRC6;CDC42;CDCA8;CDK1;CENPE;CEP55;CHMP4B;CLIC4;CTDP1;CTNND1;CYLD;DDX11;ECT2;ERH;FLCN;GEM;GNAI1;GNAI2;GNAI3;HEPACAM2;HSP90B1;HSPA5;INCENP;IQGAP1;KATNA1;KEAP1;KIF13A;KIF14;KIF20A;KIF20B;KIF23;KLHL13;KLHL9;LOC102155336;LOC111092504;MAK;MAP10;MAPRE3;MITD1;MPLKIP;MTCL1;MYH10;NEK2;PDXP;PIK3C3;PIN1;PKN1;PKN2;PKP4;P…	84	13536	92	18107	4.91638e-05	0.0118258
GO:0016310	phosphorylation	biological_process	7	AK9;ALDH18A1;ANKS3;CAMK2G;CDK2AP1;CDK2;CDK8;CERKL;CHKA;CHKB;CKB;CKMT1A;CLK4;CLP1;COASY;COL4A3BP;COQ8A;CSNK1G3;CSNK2B;DAPK2;DCAKD;DGKA;DGKD;DGKE;DGKG;DGKH;DGKQ;DOLK;EPHB2;ETNK1;ETNK2;FGGY;FN3KRP;GK5;GK;HMGXB3;HYKK;IDNK;IP6K1;ITPK1;ITPKA;ITPKC;KCNN3;PMVK;KHK;LIMD1;LOC100682773;LOC100686502;LOC111092250;MAP3K11;MAPK11;MAPK9;MINK1;LOC111096071;MOB1A;MVK;N4BP2;NADK2;NADK;NMRK1;PANK1;PANK2;PANK3;PANK4;…	84	13536	99	18107	0.0108661	0.499679
GO:0045202	synapse	cellular_component	3	ANK3;ANKS1B;APBB1;ARPC2;ASIC1;SMARCD1;ASIC2;CACNB4;CADM2;CADPS;CALB1;CBLN3;CDH2;CEL;CHRM2;CHRM3;CPEB1;CPEB2;CPEB3;CPEB4;CYFIP2;DENND1A;DLG4;DLGAP4;DMD;DPYSL2;DSCAM;DTNA;ERC1;GABRA3;GABRE;GAD2;GOPC;GPHN;GRIA4;GRID2;ITGA5;KCNA1;LAMB2;LIN7A;LIN7B;LIN7C;LOC102154740;LOC111090913;LOC111093016;LOC111099021;LRP6;LYPD6;MAGI2;MAP1S;MAPK8IP1;MARCKS;MINK1;LOC111096071;MME;MYO7A;MYRIP;NDE1;NECTIN1;NLGN2;NLGN…	83	13536	119	18107	0.912231	0.99779
GO:0046983	protein dimerization activity	molecular_function	5	AHR;AIFM1;ANO1;ANO2;ANO5;ANO6;ARNTL2;ARNTL;ASCL2;ASCL3;ATOH8;ATP6V1C2;BTRC;CLOCK;COR52H8;DAO;DBI;DNM1;FBXW11;GARS;GATA3;HES4;HEY1;HEYL;HPS1;HPSE;ID1;ID3;KIF9;LOC102154067;LOC106557725;LOC481228;LOC490969;MAX;MEF2B;MEF2C;MGA;MITF;MLXIP;MNT;MSC;MXD1;MXD3;MXD4;MXI1;MYCN;MYC;NCOA1;NCOA2;NEUROD1;NPAS1;NPAS2;NPAS3;PEX3;POLR1C;POLR1D;LOC111092404;POLR2C;POLR2J;PPP3CA;PPP3CB;PTF1A;SREBF1;STAT3;STX2;TAF5;…	82	13536	111	18107	0.633024	0.92626
GO:0005506	iron ion binding	molecular_function	8	ACO2;ADI1;AGMO;ALKBH8;ALOX15B;ALOX15;ALOX5;ALOXE3;BBOX1;CDO1;CH25H;CYGB;CYP1A1;CYP1B1;CYP26B1;CYP27A1;CYP27C1;CYP2C18;CYP2J2;CYP2R1;CYP2S1;CYP2U1;CYP39A1;CYP4A37;CYP51A1;CYP7B1;EGLN1;EGLN2;EGLN3;ETHE1;FAXDC2;FBXL5;FTL;HIF1AN;JMJD6;KDM3A;KDM7A;LCN2;LOC100686469;LOC100855540;LOC100855558;LOC100856577;LOC102152484;LOC102155200;LOC111095870;LOC111097728;LOC476453;LOC480784;LOC484867;LOC485619;LOC6094…	82	13536	113	18107	0.74413	0.92626
GO:0030308	negative regulation of cell growth	biological_process	7	ACVR1B;ACVRL1;ADAM15;APBB2;BMPR2;BST2;CAPRIN2;CCAR2;CCDC85B;CDA;CDKN1A;CDKN1B;CDKN2AIP;CDKN2A;CDKN2C;CDKN2D;CRLF3;DACT3;DCBLD2;DCUN1D3;EAF2;EI24;ENPP1;FBP1;FHL1;FLCN;FOXK1;FRZB;GDF9;GJA1;GNG4;HNF4A;HYAL1;HYAL2;INHBA;IP6K2;KCNMB4;LOC102151229;LOC102152029;LOC102153535;LOC102153756;LOC102155086;LOC102155379;LOC102156686;LOC106557917;LOC111093862;LOC111094798;MSX1;MUL1;NAIF1;NDUFS3;NOV;OSGIN1;PHB;PM…	82	13536	119	18107	0.940279	0.99779
GO:0006281	DNA repair	biological_process	9	ANKLE1;ASTE1;ATM;BACH1;BCCIP;BRCC3;CDK2;CHEK1;CHRNA4;CINP;DMAP1;EEPD1;EID3;EME1;ENDOV;EPC2;ERCC6L2;FAAP100;FAAP24;FANCC;FANCD2;FANCI;FANCL;GTF2H3;HAUS3;POLN;HINFP;INIP;INO80E;INTS3;SLC27A3;LOC102151191;LOC102153058;LOC102153836;LOC102154125;LOC106557691;LOC106560206;CCDC34;LOC111095260;LOC111096315;LOC111096743;LOC111098412;LOC612320;MBD4;MMS19;MNAT1;MTOR;MUS81;NSMCE2;NSMCE4A;NUDT1;PDS5B;PIF1;POL…	82	13536	163	18107	1	1
GO:0031012	extracellular matrix	cellular_component	3	ADAMTS15;AEBP1;APOE;APOH;B4GALT7;CANT1;CFP;CHADL;CILP;CLU;CMA1;COL14A1;COL21A1;COL8A1;COL8A2;COMP;CPXM2;CRIP2;DPT;ECM1;EFEMP1;EGFL7;EMILIN2;F3;FBN1;FBN2;FBN3;FGFR2;HNRNPM;HSP90B1;HSPG2;LOC106558295;IGFBP7;LGALS3;LMCD1;LOC111093353;LOC487628;LOXL1;LOC111093351;LTBP3;MFGE8;MGP;MMP12;MMP13;MMP14;MMP15;MMP16;MMP17;MMP19;MMP1;MMP23B;MMP24;MMP2;MMP7;MMP9;MYOC;NDP;NID2;OMD;PCOLCE;PCSK6;PKM;PXDN;RARRES2;…	80	13536	92	18107	0.00316113	0.224656
GO:0007399	nervous system development	biological_process	7	ACTL6A;APOB;APP;ARHGAP26;ARHGEF7;ASIC1;SMARCD1;BARX1;CAMK2D;CAMK2G;CDC42;CLN8;CUX1;SH2B2;DCLK1;DLG1;DLG2;DLG3;DLG4;DOK4;DPYSL2;DSCAM;DYRK1A;EFNA5;ENC1;EP300;EPHB2;EPM2A;ERBB4;FGF14;FOS;GAL;GAS7;GFRA2;GLRB;HES6;ITM2B;ITM2C;KIF1BP;LOC106557821;LOC106559890;LOC111089960;LOC478038;LOC111092012;LOC478773;LOC487173;LRCH4;LY6H;MAFB;MARK4;MBD5;MBNL1;MYLIP;NAB1;NAB2;NAV1;NDUFV2;NES;NEUROD1;NME1;NRG1;NRSN1…	80	13536	99	18107	0.0988529	0.92626
GO:0016192	vesicle-mediated transport	biological_process	6	AGAP1;AMPH;AP1B1;AP1G2;AP1M1;AP1M2;AP1S1;AP1S2;AP2A1;AP2A2;AP2B1;AP2M1;AP3B2;AP3M2;AP3S1;AP4B1;AP4E1;ARF1;ARF3;ARF4;ARFGEF1;ARFGEF2;BCAS3;CCZ1;CHMP1A;CLINT1;CLTA;CLTC;CNIH1;COPB1;COPG1;COPZ1;CPNE1;RBM12;CYTH1;FMN2;FNBP1;GBF1;GGA1;GGA2;GGA3;GOLT1B;JAGN1;IL17RE;KDELR2;KIF16B;KXD1;LOC102151415;LOC102155463;LOC475497;MAPK8IP1;MAPK8IP3;MON1A;MON1B;NCK1;NCK2;RAB10;RAB39B;RHOBTB3;RTN3;SAR1A;SAR1B;SFT2D1…	79	13536	92	18107	0.00704229	0.373667
GO:0007411	axon guidance	biological_process	7	ANK3;APBB2;B3GNT2;B4GAT1;BMP7;BOC;CDK5R1;CHL1;CNTN2;CNTN4;CSF1R;CXCL12;DPYSL2;DVL1;EFNA1;EFNA3;EFNA4;EFNA5;EFNB1;EFNB2;EFNB3;ENAH;EPHA5;EPHB2;ETV1;EVL;FLRT2;FLRT3;GAB2;GATA3;GLI2;ISPD;KIF26A;KIF26B;KIF5A;KIF5B;KIF5C;KLF7;KRAS;LAMB2;LGI1;LMX1A;LOC100688321;LOC100855749;MAPK8IP3;MATN2;MYH10;NEO1;NFASC;NGFR;NR4A3;NRP2;NRXN1;OPHN1;PTPN11;PTPRO;RAC1;RANBP9;RELN;ROBO1;ROBO2;ROBO3;RYK;SEMA3C;SEMA4F;SEMA…	77	13536	88	18107	0.00255799	0.195093
GO:0005975	carbohydrate metabolic process	biological_process	5	ADPGK;B3GAT3;B4GALT2;B4GALT3;B4GALT4;B4GALT5;B4GALT6;CHI3L1;CHST2;CHST3;CS;FBP2;FGGY;FUT4;GALC;GALNT4;GANAB;GANC;GBA;GBGT1;GCKR;GFPT1;GFPT2;GGTA1P;GK5;GLB1L;GLB1;TMPPE;GNPDA1;GNPDA2;GPD1L;GUSB;HEXA;HEXDC;HHIPL1;CYP46A1;HPSE;HYAL1;HYAL2;HYAL3;IDUA;IFRD2;KHK;KLB;KL;LCTL;LDHAL6B;LDHA;LDHB;LOC102152275;LOC475937;LOC479922;LOC480825;LOC489707;LOC607276;LOC607314;LOC607460;LOC612019;MANBA;MDH1B;MDH1;MD…	77	13536	104	18107	0.617471	0.92626
GO:0006810	transport	biological_process	5	ABCA6;ACBD3;ACBD5;AFM;ALB;APOD;AQP11;ASNA1;ATP2B1;CHIC1;CLVS1;CNIH2;CNIH3;CRABP2;DBI;DYNLRB1;DYNLRB2;FABP3;FABP4;FABP5;FYCO1;G3BP1;G3BP2;GRIA3;GRID2;IGF2R;LAPTM4A;LAPTM5;LOC100688443;LOC481674;LOC486353;MTCH1;NXT2;PITPNB;PITPNC1;PITPNM1;PITPNM2;PITPNM3;PTGDS;RBP1;RBP4;SEC14L1;SEC14L2;SLC25A15;SLC25A20;SLC25A27;SLC25A34;SLC25A35;SLC25A38;RPSA;SLC25A39;SLC25A3;SLC25A46;SLC25A48;SLC25A51;SLC25A53;SL…	77	13536	104	18107	0.617471	0.92626
GO:0004222	metalloendopeptidase activity	molecular_function	8	ADAM10;ADAM11;ADAM15;ADAM17;ADAM19;ADAM22;ADAM23;ADAM28;ADAM33;ADAM9;ADAMTS10;ADAMTS12;ADAMTS14;ADAMTS15;ADAMTS16;ADAMTS17;ADAMTS19;ADAMTS1;ADAMTS2;ADAMTS3;ADAMTS4;ADAMTS5;ADAMTS6;ADAMTS7;ADAMTS8;ADAMTS9;ADAMTSL1;ADAMTSL4;ADAMTSL5;AFG3L2;BMP1;ECE1;ECE2;IDE;KEL;LMLN;LOC479815;LOC487628;LOC608455;LOC611720;MBTPS2;MIPEP;MME;MMP11;MMP12;MMP13;MMP14;MMP15;MMP16;MMP17;MMP19;MMP1;MMP23B;MMP24;MMP28;MMP2…	77	13536	112	18107	0.939922	0.99779
GO:0005198	structural molecule activity	molecular_function	3	ADD2;ADD3;ANXA1;BVES;CAV1;CDC42SE1;CDC42SE2;CDK14;CLDN12;CLDN10;CLDN19;CLDN1;CLDN22;CLDN23;CLDN2;CLDN34;CLDN3;CLDN4;CLDN7;CLDN8;CLTA;CLTB;CLTCL1;CLTC;COL15A1;COL18A1;COPB1;COPB2;COPE;COPG1;COPG2;CTNNA1;DES;DSP;EPB41L1;EPB41L2;EPB41L3;EPB41;EVPL;FIS1;CLDN15;GFAP;IFFO1;IFFO2;INA;ISCA1;ISCA2;JUP;KRT17;KRT18;KRT222;KRT23;KRT5;KRT7;KRT80;KRT89;KRT8;LAD1;LMNA;LOC111096734;LMNB1;LMNB2;LOC102155597;LOC10…	77	13536	125	18107	0.999604	1
GO:0051607	defense response to virus	biological_process	5	ABCC9;ADAR;AGBL4;ATG7;BNIP3L;BNIP3;BST2;C20H19orf66;CD40;CD86;CXCL10;DDX41;EXOSC4;EXOSC5;F2RL1;FADD;FAM227A;GPAM;HYAL2;IFIT2;IFIT3;IFIT5;IFNLR1;IL6;IRF1;IRF3;IRF5;ISG15;ITGAX;KCNJ8;LOC102151615;LOC102151812;LOC102153553;LOC102154270;LOC102154664;LOC102155568;LOC102156502;LOC102156665;LOC102157331;LOC106558034;LOC106558374;LOC106558823;LOC106559437;LOC111090201;LOC111090312;LOC111091236;LOC1110921…	77	13536	174	18107	1	1
GO:0005770	late endosome	cellular_component	10	ABCA5;ANKRD13D;ANKRD27;AP5S1;ATG9A;ATP7A;ATP7B;CHMP2B;CLCN3;CLN3;CLTCL1;CTNS;CXCR4;DDIT3;DERL1;DERL2;DYSF;EXOC8;F2R;GNPNAT1;HTT;IGF2R;KCNQ1;KIAA1324;LAMTOR2;LGMN;LOC111090135;LOC442967;M6PR;MAGI2;MICALL1;MROH1;MTM1;MVB12B;NMNAT2;NTRK1;OSBPL1A;PIK3C3;PIK3R4;POLR2L;CHID1;RAB22A;RAB7A;RAB7B;RAB9A;TCEANC;RAP1A;RAPGEF2;RHOB;RILP;RNF128;RUBCN;SDF4;SLC11A1;SLC30A2;SLC30A3;SLC30A4;SLC31A1;SLC9A6;SNX14;SN…	76	13536	78	18107	4.92514e-08	2.93351e-05
GO:0045121	membrane raft	cellular_component	5	ABCA1;ADAM17;AHNAK;ANGPT1;ANXA13;APP;ARID3A;ATP2B1;BCL10;CAPN2;CARD11;CD14;CD36;CD55;CLIP3;CXADR;DAG1;DLG1;DLL1;DMD;EFNB1;EGFR;EPHB1;ERLIN2;FURIN;GPC1;GPM6B;GPRC5B;GRIP1;HPSE;HYAL2;ICAM1;ITGB1;KCNA5;KCNE3;KCNQ1;KDR;KRAS;LAT2;LOC102153657;LYN;MAL2;MALL;MYO1C;NPC1;NTSR1;PAG1;PI4K2A;PIKFYVE;PPP2R1B;PPT1;PRNP;PSEN1;RAB5A;RAP2B;RFTN1;RFTN2;BOLL;RHOQ;S1PR1;SERPINH1;SGCA;SLC2A4;SLC6A4;SLC9A1;SORBS1;STOM…	76	13536	92	18107	0.0487923	0.92626
GO:0003729	mRNA binding	molecular_function	8	AGO2;AMFR;NUDT21;CALR;CELF1;CELF3;CELF4;CLUH;CPSF1;CPSF6;CSTF2;CSTF3;DCP1A;DCP1B;EDC3;EIF4A3;EIF4ENIF1;ELAVL4;ESRP1;ESRP2;FMR1;FXR1;FXR2;FYTTD1;G3BP1;HNRNPC;HNRNPLL;IGF2BP2;JRK;KHSRP;LOC102153257;LOC111091931;LOC610615;LOC610648;LUC7L2;LUC7L3;LUC7L;MECP2;MRPL13;MRPS7;NCBP2;NCBP3;NOCT;NSRP1;NUDT16;PAIP2;PARK7;PCBP1;PCF11;PTBP2;PUM3;PURB;RBFOX2;RBM25;RBM5;RBM8A;RBMX;RC3H2;RNPS1;RPS13;RPS26;RPS2;RPS…	75	13536	87	18107	0.00693276	0.373667
GO:0004725	protein tyrosine phosphatase activity	molecular_function	9	CDC14A;CDC14B;CDC25A;CDC25B;CDC25C;CDKN3;DUSP10;DUSP11;DUSP14;DUSP16;DUSP18;DUSP1;DUSP26;DUSP2;DUSP3;DUSP5;DUSP6;DUSP7;DUSP8;EPM2A;EYA1;EYA2;EYA3;EYA4;HACD2;LOC102151298;LOC106558366;LOC480264;MTM1;MTMR14;MTMR1;MTMR2;MTMR3;MTMR4;MTMR6;MTMR7;PALD1;PTEN;PTP4A1;PTP4A2;PTP4A3;PTPDC1;PTPMT1;PTPN11;PTPN12;PTPN13;PTPN14;PTPN1;PTPN21;PTPN22;PTPN23;PTPN2;PTPN3;PTPN9;PTPRA;PTPRB;PTPRC;PTPRD;PTPRE;PTPRF;PTP…	75	13536	89	18107	0.0217261	0.727739
GO:0031410	cytoplasmic vesicle	cellular_component	9	ADAMTS1;AMOTL1;AMOTL2;ANP32E;ARRB1;ARRDC1;ARRDC2;ASTN2;BICD1;BICD2;CADPS;CALY;CCDC88A;CLN3;DAPK2;DLL1;DSC2;EEA1;EMP2;ENPEP;ERBB2;FES;FLOT1;GBP5;GCH1;HFE;HYAL1;HYAL2;HYAL3;IFRD2;IL15RA;ITCH;ITGA5;ITGB1;KIAA0319L;LMAN2;LRP6;MAP1LC3B;MARCH2;MARVELD2;MIB1;MMP14;MPDZ;MYOC;N4BP3;NKD2;NOTCH1;PDCD6;PDE6D;PIKFYVE;PRSS12;PSEN1;PSMC5;RAB13;RIN3;RP2;RUSC1;RUSC2;SCG3;SENP2;SH3GLB1;SH3TC2;SLC11A2;SLC9A6;SOD1;S…	74	13536	82	18107	0.000365369	0.0557321
GO:0090090	negative regulation of canonical Wnt signaling pathway	biological_process	11	AMER1;AMER2;ANKRD6;APC2;APC;AXIN1;AXIN2;BICC1;BMP2;CAV1;CBY1;CDH2;CHD8;CTHRC1;CTNND1;CYLD;DAB2IP;DAB2;DACT1;DACT3;DDIT3;DKK2;DKK3;EGR1;FOXO1;FOXO3;FRZB;FZD1;FZD6;G3BP1;GLI1;GPC3;GREM1;INVS;ISL1;LATS1;LATS2;LEF1;LIMD1;LZTS2;MAD2L2;MAPK14;MCC;MLLT3;NKD1;NKD2;NOTCH1;NPHP3;NPHP4;PPP2R3A;PRKN;PTPRO;RAPGEF1;RBMS3;RGS19;RGS20;ROR2;SCYL2;SDHAF2;SFRP4;SFRP5;SNAI2;SOX10;SOX9;STK3;STK4;TCF7L2;TLE2;TMEM131L;…	74	13536	85	18107	0.00418942	0.271042
GO:0035335	peptidyl-tyrosine dephosphorylation	biological_process	9	CDC14A;CDC14B;CDC25A;CDC25B;CDC25C;CDKN3;DUSP10;DUSP11;DUSP14;DUSP16;DUSP18;DUSP1;DUSP26;DUSP28;DUSP2;DUSP3;DUSP5;DUSP6;DUSP7;DUSP8;EPM2A;EYA1;EYA2;EYA3;EYA4;LOC102151298;LOC106558366;LOC480264;MTM1;MTMR14;MTMR1;MTMR2;MTMR3;MTMR4;MTMR6;MTMR7;PALD1;PTEN;PTP4A3;PTPDC1;PTPMT1;PTPN11;PTPN12;PTPN13;PTPN14;PTPN21;PTPN22;PTPN23;PTPN2;PTPN3;PTPN4;PTPN6;PTPN9;PTPRA;PTPRB;PTPRC;PTPRD;PTPRE;PTPRF;PTPRG;PTPR…	74	13536	91	18107	0.0898489	0.92626
GO:0030036	actin cytoskeleton organization	biological_process	6	ABL2;ABLIM2;ABLIM3;ABR;AMOT;ARHGAP26;ARHGEF17;ARHGEF5;CAP1;CAPZB;CDC42EP2;CLN3;CORO1A;CORO1C;CORO2A;CORO2B;CORO6;CTTNBP2;CUX1;SH2B2;DAAM1;DAAM2;DIAPH3;DNAJB6;DOCK2;ELMO1;ENAH;FGD1;FHL3;FLII;FLNB;FMNL1;FMNL3;FOXJ1;GAS2L3;IQSEC1;IQSEC2;IQSEC3;KLHL17;KRAS;LOC100684448;LOC102151313;LOC102153864;LOC111092837;LOC111098945;LOC476151;LOC490877;LOC491973;LRRC45;RAC3;MOB2;MTSS1;NF1;NF2;NISCH;NUAK2;OPHN1;PA…	73	13536	79	18107	5.40878e-05	0.0120809
GO:0007156	homophilic cell adhesion via plasma membrane adhesion molecules	biological_process	7	CADM1;CADM2;CADM3;CADM4;CD200;CDH10;CDH11;CDH13;CDH17;CDH18;CDH19;CDH1;CDH20;CDH22;CDH2;CDH3;CDH5;CDH7;CDHR2;CELSR1;CELSR2;CELSR3;CLSTN2;CLSTN3;DCHS1;DSC2;DSC3;DSCAM;DSG1;DSG2;ESAM;FAT1;FAT3;FAT4;IGSF9B;IGSF9;LOC106557817;LOC106557821;LOC111089960;LOC478038;LOC111092012;LOC479376;LOC479600;LOC487172;LOC100855970;LOC487173;LOC487174;LOC487175;LOC487176;LOC487177;LOC487178;LOC489647;LOC607598;NECTI…	73	13536	108	18107	0.963589	1
GO:0003725	double-stranded RNA binding	molecular_function	7	ACTN1;ADARB1;AGO2;AGO3;APTX;DDX1;DDX21;DDX58;DHX15;DHX30;DHX36;DHX58;DICER1;DUS2;EIF2AK2;SULT6B1;EIF4A1;SENP3;ELAVL1;FAM227A;HMGB1;HSP90AB1;IFIH1;ILF2;ILF3;LOC102151615;LOC102151812;LOC102153553;LOC102154270;LOC102154664;LOC102155568;LOC102156502;LOC102156665;LOC102156762;LOC102157331;LOC106558034;LOC106558374;LOC106558823;LOC106559437;LOC111090201;LOC111090312;LOC111091236;LOC111092180;LOC111092…	73	13536	159	18107	1	1
GO:0051301	cell division	biological_process	5	ANAPC10;ANAPC15;ARPP19;BABAM2;BIRC5;BOD1;BRCC3;BUB3;CCNE2;CDC123;CDC6;CDCA2;CDCA3;CDK2;CDK5;CENPJ;CHMP1B;CINP;CKS1B;CKS2;CLASP1;CLASP2;CNTRL;DIS3L2;DSN1;FAM83D;FZR1;GNAI1;GNAI2;GNAI3;ITGB3BP;KATNA1;KATNB1;KIF14;KLHL22;LOC100686305;LZTS2;MAEA;MCMBP;NCAPD2;NCAPH;NSMCE2;PAFAH1B1;PARD3B;PARD6G;PDS5B;PHF13;PPP1CA;PPP1CB;PPP1CC;PRKCE;RPS3;SAC3D1;SEH1L;SEPT11;SEPT2;SEPT7;SKA1;SKA2;SPAG5;SPART;CCDC169;SP…	72	13536	76	18107	4.76121e-06	0.00175157
GO:0042593	glucose homeostasis	biological_process	8	ADIPOR2;ADRA2A;AKT1;ALMS1;APPL1;ASPSCR1;BAD;BHLHA15;CEBPA;CRY1;MTERF2;CRY2;CYB5R1;ADIPOR1;CYB5R4;DHPS;ERO1B;FFAR1;FFAR3;FFAR2;FOXO1;FOXO3;G6PC2;GCGR;GK;GPI;GPRC5B;HIF1A;HNF1A;HNF4A;IGFBP5;IL6;INPP5K;INSR;LEPR;LEP;LOC100686848;LOC102157036;LOC491503;MBD5;MCU;NCOA5;NEUROD1;NUCKS1;OAS1;PDK2;PDK4;PDX1;PFKM;PLSCR3;PPARG;PRCP;PRKAA1;PTCH1;PTPN11;PTPN2;PYGL;RBP4;RFX6;RMI1;RPH3AL;SELENOT;SIDT2;SIRT6;SLC1…	72	13536	82	18107	0.00284891	0.213378
GO:0007420	brain development	biological_process	9	ABCB6;ABR;APOD;ARL6;ARNT2;ATP2B1;BAG6;BPTF;BRCA2;C2CD3;C5H11orf63;CCNA2;BBS7;CDK5RAP2;CHD8;CKB;CLN5;CNTNAP2;COL4A1;CTNS;DCLK1;DPYSL2;EML1;EPHA7;EPOR;FAS;FOXJ1;GAS8;GRHL2;HNMT;IFT172;IMMP2L;IRS2;KLHL17;LOC100686502;LOC111097407;LOC489024;LOC609235;MAP1S;MARCKS;MBD3;MED1;NAPA;NDRG4;NDUFS4;NF1;NNAT;PAFAH1B3;PCDH19;PLXNB2;DENND6B;POMK;PPT1;PRKDC;PTCH1;PTPN11;PYGO2;QARS;RARG;RIDA;ROBO2;S1PR1;SELENOP;S…	72	13536	89	18107	0.109989	0.92626
GO:0016787	hydrolase activity	molecular_function	4	AADACL4;ABHD11;ABHD12B;ABHD14A;ABHD14B;ABHD8;ADPRM;AMFR;NUDT21;BPHL;BRCC3;CDADC1;CMBL;CPPED1;DAGLA;DAGLB;DDHD2;DNAJC4;NUDT22;DPYSL2;ENDOG;ENTPD1;ENTPD5;ENTPD6;ENTPD7;EPHX2;EPHX3;FHIT;GLB1;TMPPE;GNPDA1;GNPDA2;GPN2;GPN3;HDAC10;HDAC11;HDHD3;HINT1;IDI1;IMMP2L;INPPL1;LOC488767;LOC611720;MANEAL;MBLAC1;MEST;MINDY4;MPND;MPPE1;MPPED2;MRPL46;NANP;NUDT11;NUDT12;NUDT13;NUDT19;NUDT5;NUDT6;NUDT8;OPLAH;PDE4D;PM…	72	13536	92	18107	0.25981	0.92626
GO:0015630	microtubule cytoskeleton	cellular_component	10	AAMP;ADCY10;ALKBH2;ALKBH8;ATXN7;C10H12orf66;CCDC69;CCNA1;CCSER2;CDC42EP2;CDC42EP4;CDC7;CDK16;UBA1;CHP1;DVL1;ESRRA;F11R;FAM161B;FER;FES;FMN1;GAPDH;GAS8;HOOK1;HYPK;ID3;IQGAP1;KARS;LOC106559694;RP9;LOC111097407;LYST;MACF1;MAP4;MAP7D1;MAP7D2;MAP7D3;MAP7;MAPK1;MAST2;MFN2;MID1IP1;NAV1;NUDCD2;PCIF1;PKNOX2;PMS2;POLR2C;PRKCI;RASSF1;RBM39;RELL1;RUSC1;SHMT2;SHTN1;SP4;SPAG1;SPAG6;SPTAN1;SRA1;STRBP;TACC1;TACC…	71	13536	80	18107	0.0015527	0.146024
GO:0016491	oxidoreductase activity	molecular_function	4	AKR1B1;AKR1E2;CFAP61;CH25H;CHML;OPN3;CHM;CREG1;CREG2;CRYZL1;CRYZ;CYB561;CYB5R3;CYBASC3;CYBRD1;DHRS11;DHRS13;DHRS7B;DHRS7;DHRSX;F8;FADS3;FAR1;FAXDC2;FOXRED1;GDI1;GDI2;GFOD1;GFOD2;HSD11B1L;HSD11B2;HSD17B12;HSD17B4;HSD17B6;HSD17B8;KDM1A;KDM1B;LOC100688446;LOC100856647;LOC106557914;LOC480785;LOC483793;LOC612278;LOC610164;LOC610994;MAOB;MICAL2;MMACHC;MSMO1;MTO1;OSGIN1;OSGIN2;OXNAD1;OXR1;PDPR;PRDX4;PRD…	71	13536	83	18107	0.0126392	0.529509
GO:0016323	basolateral plasma membrane	cellular_component	6	ABCC4;ANK2;ANXA13;AP2A1;AQP1;AQP4;ATP1B1;ATP2B1;ATP7A;ATP7B;B4GALT1;C5AR1;CA11;CASK;CAV1;CDH17;CDH2;CLDN19;CLDN7;CLDN8;CNNM2;CNNM4;CTNNA2;CTNNB1;CXADR;DLG1;DLG2;DLG3;DLG4;DSP;DSTYK;EGFR;EPCAM;ERBB2;ERBB4;ERBIN;FLOT1;FLOT2;HEPH;HPGD;ITGA3;KCNJ4;KCNQ1;LIN7A;LIN7B;LIN7C;LOC102156359;LOC442967;MARVELD2;MSN;NDRG4;NKD2;NOD1;NOD2;NUMB;ORAI1;PDGFB;PDZD11;PKD1;RAB17;SCRIB;SLC19A1;SLC26A5;SLC29A2;SLC40A1;S…	71	13536	86	18107	0.0571073	0.92626
GO:0008083	growth factor activity	molecular_function	6	ADA2;ANGPTL3;BDNF;BMP2;BMP3;BMP4;BMP6;BMP7;CDNF;CLEC11A;CSF1;CXCL12;EGF;EREG;FBRS;FGF10;FGF11;FGF12;FGF13;FGF14;FGF18;FGF19;FGF1;FGF21;FGF22;FGF2;FGF5;FGF7;GDF11;GDF15;GDF6;GDF9;GDNF;GMFB;GMFG;HBEGF;HGF;IGF1;IGF2;IL11;IL6;INHBA;INHBB;JAG2;KITLG;LEP;LIF;LOC100855618;LOC607768;MDK;NENF;NRG1;NTF3;OSGIN1;PDGFA;PDGFB;PDGFD;PGF;PTN;RABEP1;RABEP2;TFF1;TGFB1;TGFB2;TGFB3;THBS4;VEGFA;VEGFB;VEGFC;VEGFD;ZFP9…	71	13536	102	18107	0.903707	0.99779
GO:0018108	peptidyl-tyrosine phosphorylation	biological_process	9	ABI1;ABI2;ABL1;BAZ1B;CLK1;CLK2;CLK3;CLK4;CSF1R;DDR1;DDR2;DSTYK;DYRK1A;DYRK2;EFEMP1;EGFR;EGF;EPHA1;EPHA2;EPHA3;EPHA4;EPHA5;EPHA6;EPHA7;EPHB1;EPHB2;EPHB3;EPHB4;ERBB2;ERBB4;EREG;FER;FGFR1OP;FGFR1;FGFR2;FGFR3;FGFR4;FLT1;FLT3;FLT4;FYN;IL12RB2;INSRR;INSR;KDR;KIT;LCK;LOC102156359;LOC111094605;MAP2K2;MELK;MERTK;MET;MST1R;NPTN;LOC111093395;NTRK1;NTRK2;NTRK3;PDGFB;PDGFRA;PDGFRB;PTPN6;RELN;RET;TEK;TIE1;TYRO…	70	13536	81	18107	0.0079197	0.409337
GO:0035023	regulation of Rho protein signal transduction	biological_process	11	ABR;AKAP13;ALS2;ARHGEF10L;ARHGEF10;ARHGEF11;ARHGEF12;ARHGEF15;ARHGEF16;ARHGEF17;ARHGEF18;ARHGEF19;ARHGEF1;ARHGEF25;ARHGEF26;ARHGEF28;ARHGEF2;ARHGEF33;ARHGEF37;ARHGEF38;ARHGEF39;SIT1;ARHGEF3;ARHGEF40;ARHGEF4;ARHGEF5;ARHGEF6;ARHGEF7;ARHGEF9;DLC1;DNMBP;ECT2;EPS8L1;EPS8L2;FARP1;FARP2;FGD1;FGD2;FGD3;FGD4;FGD5;FGD6;FLOT1;ITSN1;ITSN2;KALRN;LOC100856635;LOC111095842;LOC612942;CAVIN4;MCF2L;NET1;NGEF;OBSCN…	70	13536	85	18107	0.0640796	0.92626
GO:0001078	transcriptional repressor activity, RNA polymerase II proximal promoter sequence-specific DNA binding	molecular_function	7	AEBP2;ASCL2;ATF3;BACH1;BHLHE40;BHLHE41;CC2D1A;CC2D1B;CUX2;DACH1;E2F8;EN1;ESRRA;ETS2;FOXO1;FOXP2;GATA3;GCFC2;GFI1;GZF1;HHEX;HINFP;HOXA2;HSF1;INSM1;IRF3;LOC111097105;LOC481228;MLXIPL;MXD1;MYPOP;MZF1;NACC2;NFATC2;NFATC4;NFE2L3;NFIL3;NFX1;NFXL1;NKX6-1;NR1D1;NR2C1;PAXBP1;PITX2;PPARA;PRDM1;PRDM5;PROX1;RELA;REST;SKIL;SNAI1;SNAI2;SP3;SPI1;TBX15;TBX3;TCF21;TCF3;TFAP2A;TGIF1;YY1;ZBTB7A;ZFP90;ZFPM1;ZFPM2;ZN…	70	13536	85	18107	0.0640796	0.92626
GO:0002230	positive regulation of defense response to virus by host	biological_process	8	ACIN1;ACKR3;ALKBH5;ALPK1;ANXA5;ATP1B1;C15H1orf210;C29H8orf59;CCDC36;CD93;CHAF1B;CHST3;CLDN7;CPA3;CREB3;DDX58;DKKL1;DNAAF2;FAM131B;FAM13B;FGF14;FGF7;FGFBP1;FXR2;GMIP;IL23A;IST1;ITPKC;KCNQ1;KIAA1549L;LMCD1;LOC102152029;LOC106558237;LOC106558262;LOC100856216;LOC106558266;LSM4;MAP1A;MAVS;MBD5;MDH1;MRPS10;MRPS2;MTSS1;MYLK;MYOM1;NTHL1;NUP93;PDK4;PEX13;PEX3;PML;PNPO;PPFIBP1;REP15;PPY;PTPN22;RBM18;REEP2;…	70	13536	92	18107	0.438414	0.92626
GO:0005759	mitochondrial matrix	cellular_component	11	ACOT9;ACSM3;ACSS1;ACSS3;AK4;ALAS1;ALKBH7;ARL2;ATP5J2;BLOC1S1;C1QBP;CASQ1;CBR4;CCAR2;CLPP;CLPX;COASY;CRY1;MTERF2;CS;DECR1;DIMT1;DLAT;ECI1;ERAL1;ERBB4;ETFB;CLDND2;ETFBKMT;FDXR;GLRX2;GLRX5;GLS2;GLS;GRPEL1;GRPEL2;GUF1;HADH;HAGH;HSD17B8;HSPE1;ISCA1;ISCA2;ISCU;LOC478072;LOC480491;LOC609147;LOC609748;LONP1;LRRK2;MARS2;MTERF1;MTHFD2L;NARS2;NFS1;NUDT1;PAM16;PITRM1;PPIF;PRIMPOL;RAD51;RHOA;GPX1;RPS3;SDHAF2;…	69	13536	77	18107	0.000954839	0.107596
GO:0008201	heparin binding	molecular_function	6	ABI3BP;ADAMTS15;ADAMTS1;ADAMTS5;APLP1;APLP2;APOB;APOE;APOH;APP;BMP4;CCDC80;CCL8;CHRD;CLEC3B;COL13A1;COL5A1;COL5A3;COMP;CRISPLD2;CTGF;CXCL10;CYR61;ECM2;FGF12;FGF14;FGF1;FGF7;FGFR1;FGFR4;FGFRL1;FMOD;GREM2;HBEGF;HSD17B12;IMPG2;LAMC2;LIPH;LOC448801;LOC475818;LPL;LRPAP1;LTF;NAV2;NOV;OGN;PCOLCE;PCSK6;PDCD5;POSTN;PRELP;PTCH1;RPL22;RSPO3;SERPINE2;SFRP1;SLIT1;SLIT2;SLIT3;SMOC2;THBS1;THBS2;THBS3;THBS4;TNXB…	69	13536	84	18107	0.0717636	0.92626
GO:0042826	histone deacetylase binding	molecular_function	6	AMFR;NUDT21;ANKRA2;ANKRD1;BCOR;BHLHE41;BRMS1L;BRMS1;CAMTA2;CBX5;CCND1;CRY1;MTERF2;DACT1;DDX20;DHX36;GMNN;HDAC10;HDAC3;HDAC4;HDAC5;HDAC6;HDAC9;HIC1;HIF1A;HOXA10;HSP90AA1;HSP90AB1;INSM1;KAT2A;KAT2B;LEF1;LOC102156762;MAPK8;MECP2;MEF2A;MEF2B;MEF2C;MEF2D;NACC2;NCOR1;NKX3-1;NR2C1;NRIP1;PHB;PHF6;PKN1;PKN2;PRDM1;PRKN;RAD9A;RBBP4;RELA;RFXANK;SIK1;SIRT2;SMG5;SP2;SUDS3;TAL1;TCF21;TFAP4;TOP2A;TOP2B;TRAF6;UHR…	68	13536	74	18107	0.00015833	0.0292934
GO:0005814	centriole	cellular_component	10	AGBL4;BBS4;BIRC5;C2CD3;CAPG;CCDC146;CCDC18;CCDC78;CCDC92;CCHCR1;CCNF;CCP110;CCSAP;CENPJ;CEP104;CEP128;CEP135;CEP162;CEP164;CEP170;CEP19;CEP250;CEP41;CEP63;CEP76;CEP83;CEP89;CETN2;CETN3;CFAP20;CNTLN;CNTROB;DZIP1L;DZIP1;FAM92A;LOC111093163;FBF1;HTT;IFT20;IFT52;KIF24;LOC102153171;LOC483842;MKS1;MPHOSPH9;NEDD1;NEURL4;ODF2;PCM1;PCNT;PLA2G3;PLK2;POC1A;POC1B;RABL2B;RAN;RP2;SASS6;SCLT1;SDCCAG8;SIRT2;SPIC…	68	13536	80	18107	0.0194851	0.68078
GO:0036064	ciliary basal body	cellular_component	12	AGBL4;AHI1;AKT1;B9D1;B9D2;BBOF1;BBS1;BBS2;BBS4;BBS5;C2CD3;CBY1;CCNA2;BBS7;CCSAP;CEP19;CEP41;CETN2;CETN3;CFAP20;CYLD;DISC1;DYNC2LI1;DZIP1L;DZIP1;EVC;EZR;FAM161A;FAM92A;LOC111093163;FOPNL;GAS8;ICK;IFT122;IFT172;IFT20;IFT57;IFT81;KIAA0586;KIFAP3;LOC102151816;LOC102153657;LOC483842;MARK4;MKS1;NEDD1;ODF2;PCM1;PKD2;PKHD1;POC1A;POC1B;PTPN23;RAB28;RAB3IP;RAB8A;RABL2B;RP2;RTTN;SPATA7;SSNA1;SSX2IP;TBC1D30;…	68	13536	84	18107	0.116108	0.92626
GO:0005178	integrin binding	molecular_function	6	ACTN1;ADAM15;ADAM17;ANGPTL3;ANXA7;CALR;CD151;CIB2;COL16A1;COL3A1;COL4A3;CTGF;CYR61;EDIL3;EMP2;ERBIN;ESM1;FAP;FBLN1;FBLN5;FBN1;FERMT3;FN1;ICAM1;ICAM2;ICAM3;ICAM4;ICAM5;IGF1;ITGA5;ITGA6;ITGB1BP1;ITGB1;ITGB3;ITGB6;JAM3;KDR;LAMA5;LAMB2;LOC102153796;LOC102156677;LOC102156915;LOC111094296;MFGE8;NISCH;NOV;NPNT;P4HB;PLPP3;PTPN2;S1PR2;S1PR3;SEMA7A;SFRP2;SYK;TGFBI;THBS1;THBS4;THY1;TLN1;UTRN;VCAM1;VTN;VWF;W…	67	13536	71	18107	1.5728e-05	0.00457502
GO:0035091	phosphatidylinositol binding	molecular_function	6	ARHGAP32;ARHGAP33;CCDC88A;ESYT2;FES;GRB7;HIP1R;HIP1;HS1BP3;ING2;ITPR1;ITPR2;ITPR3;LOC111098223;KIF16B;LOC111097364;LOC491174;MITD1;MTM1;MYO1E;NISCH;PASK;PIK3C2A;PIK3C2B;PIK3C2G;PLD1;PLD2;PLEKHA1;PXDC1;PXK;KCTD6;RPS6KC1;RUNDC3B;SBF2;SGK1;SGK3;SH3PXD2A;SH3YL1;SNX10;SNX11;SNX12;SNX15;SNX16;SNX17;SNX18;SNX1;SNX22;SNX24;SNX25;SNX27;SNX29;SNX2;SNX30;SNX31;SNX32;SNX33;SNX3;SNX4;SNX5;SNX6;SNX7;SNX8;SNX9;…	67	13536	72	18107	6.02885e-05	0.0131101
GO:0006897	endocytosis	biological_process	7	AP2A1;AP2M1;AP2S1;APP;ATP6V1H;BECN1;BIN1;LOC111091071;C11H9orf72;CHRNA7;CLN3;CSNK1D;CSNK1E;CSNK1G2;CSNK1G3;DPYSL2;EEA1;EHD1;EHD2;EPN2;FNBP1L;FNBP1;HEATR5A;HRAS;INPPL1;ITSN2;LOC111097364;LRRK2;MIB1;MYO1E;NECAP1;NECAP2;NME1;NPC1;PICALM;RAB1A;RAB22A;RAB5A;RABEP1;RABEP2;RALBP1;RBSN;SH3GL1;SH3GL3;SNX10;SNX11;SNX12;SNX18;SNX1;SNX2;SNX30;SNX32;SNX33;SNX3;SNX4;SNX5;SNX6;SNX7;SNX8;SNX9;SORT1;STON1;SYNRG;T…	67	13536	75	18107	0.00138969	0.13371
GO:0001764	neuron migration	biological_process	8	ADGRL3;ALKBH1;APBB2;ASPM;ASTN1;BAX;BBS1;BBS4;CCKAR;CDK5R1;CDK5R2;CDK5;CELSR1;CELSR3;CHL1;CTNNB1;CXCL12;DCLK1;DISC1;ELP3;FBRSL1;FBXO45;FGF13;FZD3;GAS6;GATA3;GJA1;GPM6A;ITGA3;MAPT;MARK2;MATN2;MEF2C;MYH10;NAV1;NDE1;NDEL1;NDN;NKX6-1;NR2F2;NR4A2;NTN1;NTRK2;PAFAH1B1;PCM1;PEX13;PEX5;PEX7;PITX2;POMGNT2;MIR8806;POMK;PRKG1;PSEN1;PTK2;RAPGEF2;SATB2;SDCCAG8;SEMA6A;SPOCK1;SRF;TBX20;TOP2B;TUBB2B;UNK;USP9X;YWHAE	66	13536	81	18107	0.0995955	0.92626
GO:0012505	endomembrane system	cellular_component	5	CAMK1G;CD63;CDAN1;CDK5RAP3;CYB5D2;EVI5L;EVI5;GRTP1;LOC102152829;LOC111097621;LOC480654;LOC484444;LRRC45;RAC3;MAL2;MAP1LC3B;MON1A;MON1B;MTOR;NBEAL1;NBEAL2;NENF;NRBP1;NRBP2;NSMAF;PANX1;PARD3B;PARD3;PGRMC1;PGRMC2;PLA1A;ADPRH;RABGAP1;GPR21;RABGAP1L;RABL2B;RTN3;RTN4;RUFY3;RUNDC1;SGSM1;SLC6A4;SLC9A3R1;SLC9A3R2;STX10;STX16;STX17;STX6;STX7;STX8;TBC1D10A;TBC1D10B;TBC1D13;TBC1D15;TBC1D1;TBC1D22A;TBC1D22B;T…	66	13536	83	18107	0.19227	0.92626
GO:0019221	cytokine-mediated signaling pathway	biological_process	8	ASPN;BAD;CCL2;CD44;CEBPD;CHAD;CNOT9;CSF2RA;CSF2RB;CSF3R;CUX1;SH2B2;DCN;EREG;FLRT2;FLRT3;GAB2;GHR;GREM2;IFNAR1;IFNGR1;IFNLR1;IL10RA;IL10RB;IL11RA;IL13RA1;IL13RA2;IL17RB;IL17RC;IL17RD;IL1RAP;IL1RN;IL20RB;IL22RA1;IL2RG;IL4R;IL7R;IRAK4;IRF5;JAGN1;IL17RE;JAK2;KIT;KRAS;LBP;LOC106559890;LOC487739;LOC609830;LRRC15;LRRC19;LRRC4B;LRRC4;LRRTM4;NUMBL;PODNL1;PODN;LOC106558831;PTPN11;RELA;RORA;RTN4RL1;S1PR1;SO…	66	13536	101	18107	0.987205	1
GO:0003824	catalytic activity	molecular_function	3	AASDH;ACCS;ACSF2;ACSM5;ACSS2;ADAT3;AMACR;AUH;CAPN3;CDYL2;CDYL;CWF19L1;CWF19L2;DIP2A;DIP2B;DIP2C;ECHDC3;ECHS1;ENPP5;FHIT;GPT;GSTZ1;GTF2F1;HINT2;HINT3;HPGD;ILVBL;ISOC1;ISOC2;KYAT1;LANCL1;LANCL2;LANCL3;LGI3;LOC100856034;LOC479708;LOC607314;LOC608697;MED16;PBLD;PCYT1A;TCTEX1D2;PCYT1B;PCYT2;PHKA1;PHKB;PHLPP1;PHLPP2;PIGC;PLD2;PLD3;PLD4;PPME1;PPTC7;RIMKLA;RSAD2;SCLY;SGSH;SLC3A1;SLC3A2;SPTLC1;SYN1;SYN2;S…	65	13536	77	18107	0.0295579	0.818326
GO:0051092	positive regulation of NF-kappaB transcription factor activity	biological_process	14	ARHGEF2;BCL10;CAMK2A;CAPN3;CARD11;CD40LG;CD40;CIB1;CLOCK;CLU;CTH;DDRGK1;EIF2AK2;SULT6B1;FER;GREM1;IKBKB;IKBKG;IRAK1;IRAK2;IRAK3;KRAS;LOC102153861;LTF;MID2;MTDH;MTPN;MYD88;NLRP3;NOD1;NOD2;NTRK1;PRKCB;PRKCH;PRKCI;PRKD1;PRKD2;PSMA6;RAB7B;RBCK1;RELA;RHEBL1;RIPK1;RIPK2;RIPK3;RIPK4;RNF25;RPS3;RPS6KA5;SPHK1;TERF2IP;TICAM1;TLR2;TLR3;TLR4;TNFSF11;TRAF1;TRAF6;TRAPPC9;TRIM22;TRIM25;TRIM32;TRIM62;TRIM8;UBE2N…	65	13536	79	18107	0.0751442	0.92626
GO:0005516	calmodulin binding	molecular_function	5	ASPM;ATP2B1;ATP2B4;CACNA1C;CALD1;CAMK2A;CAMK2D;CAMK2G;CAMK4;CAMSAP1;CAMSAP2;CAMSAP3;CASK;CDK5RAP2;CFAP221;CNN1;CNN2;CNN3;DAPK1;DAPK2;EDF1;EEF2K;EPB41;EWSR1;INVS;IQCB1;IQGAP1;IQGAP2;IQGAP3;KCNN1;KCNN2;KCNN3;PMVK;KCNN4;KCNQ1;KCNQ3;LOC478678;LOC482687;MAP6;MAPKAPK2;MAPKAPK3;MAPKAPK5;MARCKSL1;MARCKS;MKNK1;MKNK2;LOC106560107;MYH1;MYO1E;MYO3A;MYO7A;MYO9B;NOS1;NOS3;NRGN;PDE1C;PHKA1;PHKA2;PHKB;PHKG1;PHKG…	65	13536	86	18107	0.487318	0.92626
GO:0019898	extrinsic component of membrane	cellular_component	5	ALOX15B;ASPSCR1;ATG2B;BCL2L11;BLOC1S6;C10H2orf15;LIPT1;EHD2;EPB41L1;EPB41L2;EPB41L3;EPB41L4A;EPB41L4B;EPB41L5;EPB41;EZR;FARP1;FARP2;FRMD3;FRMD5;LOC102156662;LOC106558877;LOC111095174;LOC111095434;LOC111097364;MGLL;MICALL1;MITD1;MSN;MTMR3;MYLIP;NBEAL1;NBEAL2;NCF1;NF2;NMT1;NSMAF;PACSIN2;RDX;RGS6;SNX10;SNX11;SNX12;SNX18;SNX1;SNX30;SNX32;SNX33;SNX3;SNX4;SNX5;SNX6;SNX7;SNX8;SNX9;SYT6;SYTL4;VPS13A;VPS1…	65	13536	96	18107	0.953553	1
GO:0001649	osteoblast differentiation	biological_process	7	ADAR;AKT1;ALPL;BMP2;BMP3;BMP4;BMP6;CBFB;CHRD;COL1A1;COL6A1;CYR61;DDX21;DHX9;DNAJC13;ERH;FASN;FHL2;FIGNL1;GJA1;GLI1;GTPBP4;HNRNPU;HSPE1;IARS;IFT80;IGFBP3;IGFBP5;ITGA11;JUNB;LEF1;LGR4;LOC486424;LOC609748;MEF2C;MEF2D;MRC2;MSX2;MYOC;NF1;PHB;RBMX;RDH14;RRAS2;RSL1D1;SFRP1;SHOX2;SLC25A44;BGLAP;SNAI1;SNAI2;SND1;SNRNP200;SP7;SPP1;SYNCRIP;TMEM119;TNC;TP53INP2;TPM4;UFL1;VCAN;WNT11;WWOX;WWTR1	64	13536	72	18107	0.00241482	0.185304
GO:0010629	negative regulation of gene expression	biological_process	8	ACACB;ACE;ACVR1B;AKT1;ANXA7;BBS2;BBS4;CCR1;CD34;CD3E;CDKN1A;CNPY2;CPNE1;RBM12;CRYAB;CTGF;ERP29;FGF19;FLCN;FLOT2;GJA1;GPER1;HAVCR1;HMGB2;HRAS;INPPL1;IQGAP3;ITGB8;LOC102155886;LOC106557595;MAP2K1;MAP2K2;MEF2C;MKKS;LOC102153017;NDFIP1;NDFIP2;NOCT;NOS2;OLFM1;PARK7;PC;PDCD10;PICALM;PLAG1;PRKN;PTPN22;RACK1;RBMS3;REST;ROS1;SFMBT2;SLC35C2;SLIT3;STC2;STOX1;TBK1;TERF2;TGFB1;TGFB2;TIPARP;TMF1;UPK3B;VEGFB;ZN…	64	13536	73	18107	0.00528292	0.309496
GO:0005923	bicellular tight junction	cellular_component	6	ACTN1;AMOTL1;AMOTL2;AMOT;ANK3;BVES;CCND1;CDH5;CDK14;CLDN12;CDK4;CLDN10;CLDN19;CLDN1;CLDN22;CLDN23;CLDN2;CLDN34;CLDN3;CLDN4;CLDN7;CLDN8;CLMP;CNTD1;CTNNB1;CXADR;CYTH3;DDX58;DLG1;DLG3;ECT2;EPCAM;ESAM;F11R;FIS1;CLDN15;FRMD4A;FZD5;JAM3;LIN7C;LOC111091118;MAGI1;MAGI2;MARVELD2;MPDZ;MPP7;OCLN;PARD3B;PARD3;PARD6B;PARD6G;PATJ;PRKCZ;RAB13;RAP2B;RAP2C;RAPGEF2;STRN;TBCD;TJAP1;TJP1;TJP2;TJP3;UBN1;VAPA;VASP	64	13536	79	18107	0.122638	0.92626
GO:0051726	regulation of cell cycle	biological_process	6	ADARB1;ARNTL;BAK1;BAX;BIRC2;BOP1;BTRC;CABLES1;CABLES2;CCNDBP1;CCNE1;CCNG1;CCNG2;CCNI;CDK10;CDK14;CLDN12;CDK17;CDK2;CLIC1;COPS5;CTBP1;DOT1L;DTL;E2F5;EP300;FGF2;FIGNL1;GADD45B;GADD45G;GRK5;HIPK2;ITGB1;JUNB;JUND;JUN;LEP;LIN54;LOC100855689;LOC100856585;MADD;MNT;MX2;NUP214;OVOL2;PCLAF;PES1;PRR11;PUM1;RACK1;RAD51D;RBL1;RBL2;SKP2;SON;SRC;STAT3;TARDBP;TRIM36;TSC1;TSC2;UBA3;USP16;ZNF703	63	13536	71	18107	0.00289473	0.215519
GO:0043524	negative regulation of neuron apoptotic process	biological_process	11	AARS;ALKBH1;AMBRA1;ANGPT1;BAX;BCL2L1;BHLHB9;BIRC5;BRAF;CACNA1A;CCL2;CHL1;CLCF1;CLN3;CNTFR;CORO1A;CPEB4;EN1;GABRB3;GDNF;HIPK2;HRAS;ISL1;JUN;KDM2B;KIF14;KRAS;LGMN;LIG4;MECP2;MEF2C;MSH2;NEFL;NES;NR4A2;NR4A3;NRP1;NTF3;NTRK1;OXR1;PIK3CA;PPARGC1A;PPT1;PRKCI;PRKN;RETREG1;ROCK1;SET;SIX1;SIX4;SNCA;SOD1;STAMBP;STXBP1;TFAP2B;TOX3;TP73;UNC5B;VEGFB;VSTM2L;WFS1;XRCC2;ZFP91;CNTF	63	13536	84	18107	0.537725	0.92626
GO:0006397	mRNA processing	biological_process	10	ALKBH5;ALYREF;AMFR;NUDT21;CASC3;CELF2;CELF3;CELF6;CIR1;CLASRP;CSTF1;CSTF3;DDX5;ELAVL4;ERN1;ERN2;GPATCH1;HNRNPA1;HNRNPA2B1;HNRNPK;HNRNPLL;HNRNPL;LOC100683228;LOC102152493;LOC102157224;LOC479011;LOC610648;LSM11;MAGOHB;MAGOH;MBNL1;MBNL2;PABPC1;PAN2;PAN3;PDCD11;PPIH;PRPF38A;PTBP1;PTBP3;PUF60;QKI;RBFOX2;RBM23;RBM25;RBM26;RBM27;RBM39;RBM8A;RNASEL;SCAF1;SF1;SMNDC1;SMN;SREK1IP1;SRRM1;SRRM4;SRSF2;SRSF7;TH…	62	13536	66	18107	5.09703e-05	0.012029
GO:0000165	MAPK cascade	biological_process	9	BRAF;BRAP;CAMK2D;CAV1;CCL2;CCL5;CCR5;DAB2IP;DLG4;DOK4;ERBB4;EREG;FGF13;IL18;ITPKB;KRAS;LRRK2;MAP2K3;MAP2K4;MAP2K6;MAP3K10;MAP3K15;MAP3K20;MAP3K21;MAP3K4;MAP3K6;MAP3K7CL;MAP3K7;MAP3K9;MAP4K1;MAP4K3;CDKL4;MAP4K4;MAP4K5;MAPK10;MAPK13;MAPK15;MAPK6;MAPK7;MAPK8;MAPKAPK2;MAPKAPK3;MEF2A;MEF2C;MEN1;MINK1;LOC111096071;NDST1;NF1;NLK;NRG1;PAK3;PPM1L;RANBP9;RASAL2;RET;RHBDD3;SCG2;SETX;SHANK3;SHC1;SMAD1;TAOK3;…	62	13536	70	18107	0.00346474	0.240468
GO:0045766	positive regulation of angiogenesis	biological_process	12	ACVRL1;ADM2;AGGF1;ANGPT4;ANGPTL3;ANXA3;AQP1;BTG1;C3AR1;C5AR1;C6;CCL24;CD34;CELA1;CHI3L1;CTSH;CX3CL1;CXCL8;ECM1;EPHA1;ERAP1;F3;FGF1;FGF2;FLT1;GATA6;GREM1;HIPK2;HSPB1;HYAL1;ISL1;KDR;LOC102154267;LOC111091388;LOC111095870;LRG1;MTDH;MYDGF;NOS3;NTRK1;PDCD6;PDCL3;PIK3R6;PLCG1;PRKCA;PRKCB;PRKD1;PRKD2;PTGIS;LOC111092245;PTK2B;RAMP2;RAPGEF3;RHOB;RRAS;SASH1;SERPINE1;SPHK1;TEK;TGFBR2;THBS1;VASH2;VEGFC	62	13536	71	18107	0.00739147	0.386831
GO:0030198	extracellular matrix organization	biological_process	6	ABI3BP;ADAMTSL4;APBB2;APP;ATXN1L;B4GALT1;BCL3;CCDC80;COL27A1;COL4A6;CRISPLD2;CSGALNACT1;CYR61;DNAJB6;ECM2;EGFLAM;ELF3;ELN;EMILIN1;ERCC2;ERO1A;ERO1B;FBLN1;FOXF1;GFAP;GFOD2;HSD17B12;ITGA8;ITGB4;KAZALD1;LAMC2;LOC100684448;LOC102151313;LOC111094605;MMP9;MPZL3;NEPN;NF1;NFKB2;NID2;NPNT;OLFML2A;OLFML2B;PDGFRA;POMT1;POSTN;PRDX4;PTK2;PXDN;RECK;SERAC1;SERPINB5;SMOC1;SMOC2;SOX9;SPINT1;SPOCK2;TGFBI;THBS4;TNF…	62	13536	78	18107	0.204197	0.92626
GO:0042393	histone binding	molecular_function	5	ANP32E;APBB1;ATAD2B;ATAD2;BCAS3;BRD1;CHAF1B;COPRS;DAXX;DEK;DNAJC2;DTX3L;ELP2;HAT1;HINFP;HJURP;HMGB1;HMGB2;IPO7;JAK2;LEF1;LOC106558237;LOC106558262;LOC100856216;LOC106558266;LOC489372;LOC491174;MYSM1;NCAPD2;NOC2L;PHF21A;PHF6;PIH1D1;PKN1;PRKCB;PRMT6;PYGO2;RCC1;RNF168;RNF20;RNF8;RSF1;SART3;SET;SFMBT1;SFMBT2;SIRT1;SMARCA2;SMARCA5;SNCA;SPTY2D1;SUPT6H;TBL1X;TONSL;TP53BP1;UHRF2;UIMC1;USP16;USP3;USP49;WD…	62	13536	82	18107	0.488014	0.92626
GO:0030529	intracellular ribonucleoprotein complex	cellular_component	7	ACTN4;CASC3;CPSF6;CSNK1A1;CSNK1E;DHX9;DYRK1A;DYRK2;EEFSEC;ELAVL4;EPRS;ERG;GSK3B;GTF3C1;HNRNPA1;HNRNPA2B1;HNRNPAB;HNRNPC;HNRNPDL;HNRNPD;HNRNPH2;HNRNPLL;HNRNPL;HNRNPU;ILF2;ILF3;JMJD6;JRK;L1TD1;LARP6;LARP7;LOC100683228;LOC102152414;LOC102156352;LOC106558431;LOC111095184;LOC111095193;LOC479011;LRPPRC;LRRK2;LSM11;LSM14B;NCBP1;NFATC2;NSRP1;NUP62;IL4I1;PABPC1;PABPC4;PABPN1;PCBP2;PRR13;PCBP4;PUF60;RPS3A;…	62	13536	98	18107	0.99591	1
GO:0044325	ion channel binding	molecular_function	5	ABCC9;ACTN1;ACTN2;ACTN4;AKAP6;ANK2;ANK3;AP2M1;BAK1;CALM3;CAMK2D;CAV1;CDH5;CIB1;CTNNB1;DIAPH1;DLG1;FGF13;FHL1;FKBP1B;GRINA;HERPUD1;HOMER1;HRC;HTT;KCNB1;KCNE4;KCNIP1;KCNJ11;KCNQ1;LOC102152873;LOC106558660;LOC478678;LOC482730;LRRK2;LYN;MPP2;NEDD4L;NPTN;LOC111093395;PACS1;PACS2;PDE4B;PDE4D;PHPT1;PKD1;PKD2;RANGRF;RIMS2;RNF207;SCN3B;SRC;SRI;SUMO1;TCAF2;TCAP;TRPC1;TSPO;USP10;VDAC1;YES1;YWHAE	61	13536	70	18107	0.00872088	0.431149
GO:0005938	cell cortex	cellular_component	9	ADD3;AGTRAP;AKT2;ARF6;ARHGAP32;AXIN1;AXIN2;C2CD5;CAV1;CLASP2;CNKSR1;COBL;CRIP2;CTNNB1;CYTIP;EPB41;EPS8;FAM110C;FGFR2;FMN2;FNBP1L;FRYL;FRY;GIPC1;GPSM2;HMCN1;HMCN2;ITCH;ITPR2;KDF1;LAMC2;MARCKS;MELK;MKLN1;MYH10;MYO7A;MYO9B;NCL;NDFIP1;NEDD4;OOEP;PAFAH1B1;PARD3;PARD6B;PDZD4;PFN1;PRKD1;PSEN2;RGS19;RGS20;RIC8B;SEPT5;SNCA;SPINK5;SPIRE2;STOX1;TLE6;TSC1;USP2;WDR43;WDR81	61	13536	74	18107	0.0786529	0.92626
GO:0010951	negative regulation of endopeptidase activity	biological_process	11	AGT;AMBP;APLP2;APP;BIRC6;BST2;C3;CD109;COL28A1;COL6A3;COL7A1;CPAMD8;CRIM1;FURIN;ITIH1;ITIH2;ITIH4;ITIH5;LOC111091388;LOC477699;LOC481722;LOC484960;LOC490840;LOC491368;LOC607114;LOC607205;LOC607874;LXN;PAPLN;PCSK1N;PEBP1;MIR8819;RECK;SERPINA1;LOC111097149;SERPINB1;SERPINB2;SERPINB5;SERPINB6;SERPINB9;SERPINE1;SERPINE2;SERPINF1;SERPING1;SERPINH1;SERPINI1;SERPINI2;SLPI;SPINT1;SPINT2;SPOCK1;SPOCK3;TFP…	61	13536	93	18107	0.982177	1
GO:0045211	postsynaptic membrane	cellular_component	8	ANKS1B;ATAD1;CADPS2;CDK5;CHRM2;CHRM3;CHRNA10;NUP98;CHRNA4;CHRNA5;CHRNA7;CHRNB1;CHRNB2;CHRNB4;CLSTN2;CLSTN3;CPEB3;DAG1;DLG1;DLG2;DLG3;DLG4;DMD;DNAJA3;DNM2;GABBR1;GLRB;GPHN;GRIA1;GRIA2;GRIA3;GRIA4;GRID2;GRIK3;GRIK4;GRIN1;IQSEC3;KCND2;KCTD16;LIN7C;LOC477516;LOC479600;LRRC4;LRRTM4;MAGEE2;MINK1;LOC111096071;MPP2;NCS1;NSG1;NSMF;NTRK2;P2RX1;PRR12;SCRIB;SH2D5;SHANK1;SHANK2;SHANK3;SRGAP2;SYNE1;TENM2;ZC4H2	61	13536	100	18107	0.999184	1
GO:0008013	beta-catenin binding	molecular_function	5	AMER1;AMER2;APC2;APC;ASH2L;AXIN1;AXIN2;BCL9L;BCL9;BTRC;CALCOCO1;CDH1;CDH5;CHD8;CTNNA1;CTNNA3;CTNND2;CXADR;DACT1;DACT2;DACT3;DLG5;DVL1;DVL3;EP300;ESR1;FOXO1;FOXO3;FOXO4;GSK3B;HDAC6;KANK1;KDM6B;KLF4;LEF1;LOC111091360;LOC479600;LZIC;MED12;NUMB;PRKN;PSEN1;PTPRJ;PTPRK;PTPRU;PXN;RGS19;RGS20;RORA;SETD1A;SLC9A3R1;SMAD3;SMAD7;SOX9;SUFU;TAX1BP3;TBL1X;TCF7L1;TCF7L2;VCL	60	13536	67	18107	0.00215073	0.177363
GO:0007018	microtubule-based movement	biological_process	6	ACTR10;AP2A1;AP2B1;CASC1;CENPE;CLTA;DNAH10;DNAH2;DNAH5;DNAH6;DNAH8;DNHD1;DYNC1H1;DYNC1I2;DYNC1LI1;DYNC1LI2;DYNC2H1;DYNLRB1;DYNLRB2;KIF11;KIF12;KIF13A;KIF13B;KIF14;KIF15;KIF16B;KIF18A;KIF18B;KIF1A;KIF1B;KIF1C;KIF20A;KIF20B;KIF21A;KIF21B;KIF22;KIF23;KIF24;KIF26A;KIF26B;KIF27;KIF2A;KIF2C;KIF3A;KIF3B;KIF3C;KIF4A;KIF5A;KIF5B;KIF5C;KIF7;KIF9;KIFC1;KIFC2;KIFC3;KLC1;KTN1;LOC100855783;LOC102151505;STARD9	60	13536	76	18107	0.242138	0.92626
GO:0009791	post-embryonic development	biological_process	6	ACADM;ACO1;ACVR2B;AGO2;ALDH5A1;ALX4;APOB;ASL;ATF5;BMP4;CELA1;CHST11;CSRNP1;DHCR7;ERCC2;ETNK2;FOXP2;GATA3;GIGYF2;GNAQ;HEG1;IMPAD1;INPPL1;IREB2;ITPR1;KDM5B;KMT2A;LOC102154267;MAPK8IP3;MECP2;MORC3;MTOR;MUT;NDN;NR4A2;PLAGL2;PLEKHA1;PPP1R13L;PRDM1;PSEN1;PYGO1;PYGO2;RAB3A;RC3H2;SCN9A;SELENOP;SEMA3C;SGPL1;SLC18A2;SMAD2;SOD2;SOX6;STK36;SZT2;TAL2;TAPT1;TBCE;TET2;TIPARP	59	13536	66	18107	0.00259657	0.196836
GO:0009952	anterior/posterior pattern specification	biological_process	8	ACVR2A;ACVR2B;ALDH1A2;ALX1;ALX4;BARX1;BMPR2;BPTF;BTG2;CDON;CELSR1;CRKL;EMX2;GLI2;GLI3;GRSF1;HIPK1;HIPK2;HNF1B;HOXA10;HOXA11;HOXA2;HOXA3;HOXA5;HOXA6;HOXA7;HOXA9;HOXB2;HOXB3;HOXB4;HOXB5;HOXB6;HOXB7;HOXB8;HOXB9;HOXC10;HOXC4;HOXC6;HOXD11;HOXD10;HOXD3;HOXD8;HOXD9;KIF3A;KMT2A;LOC479600;LRP5;MLLT3;MSX1;MSX2;NEUROD1;NR2F2;PBX1;RARG;RING1;SCMH1;SMAD2;TSHZ1;TULP3;YY1;ZBTB16	59	13536	70	18107	0.0396112	0.92626
GO:0031175	neuron projection development	biological_process	6	ADCYAP1;ALKBH1;ATXN10;BICDL1;BLOC1S1;BLOC1S6;BTG2;CAMSAP1;CAMSAP2;CAMSAP3;CAPZB;CDK16;UBA1;CDK5;CLMN;CNTN1;CNTNAP2;EFHD1;EHD1;FRYL;FRY;GDNF;GDPD5;GPM6B;GPRIN1;HDGFL3;HERC1;IL6;LAMB1;LOC111097376;LRRC45;RAC3;LYN;MAP2;MAPK9;MAPT;MICALL1;MYOC;NCAM1;NCDN;NEDD4;PPP1R9A;PPP1R9B;PQBP1;RAB11A;RAB13;RAB35;RAPGEF2;RYK;SAMD14;SRF;STMN1;STMN2;STMN3;TBC1D24;TOR1A;UBE4B;UHMK1;UNC5A;VAPA;ZFYVE27	59	13536	73	18107	0.143587	0.92626
GO:0005089	Rho guanyl-nucleotide exchange factor activity	molecular_function	5	ABR;AKAP13;ARHGEF10L;ARHGEF10;ARHGEF11;ARHGEF12;ARHGEF15;ARHGEF16;ARHGEF17;ARHGEF18;ARHGEF19;ARHGEF1;ARHGEF25;ARHGEF26;ARHGEF28;ARHGEF33;ARHGEF37;ARHGEF38;ARHGEF39;SIT1;ARHGEF3;ARHGEF40;ARHGEF5;ARHGEF6;ARHGEF7;ARHGEF9;DNMBP;DOCK11;ECT2;FARP1;FGD1;FGD2;FGD3;FGD4;FGD5;FGD6;ITSN1;ITSN2;KALRN;LOC100856635;LOC111095842;MCF2L;NET1;NGEF;OBSCN;PLEKHG1;PLEKHG2;PLEKHG3;PLEKHG4;PLEKHG5;PLEKHG6;PREX1;RASGRF2…	59	13536	74	18107	0.198543	0.92626
GO:0035264	multicellular organism growth	biological_process	5	ANKRD11;APBA2;ATF5;ATRX;CCM2;CELA1;CLIC4;CTC1;DHCR7;EN1;ERCC1;ERCC2;ERCC6;ETNK2;FKBP8;FLVCR1;GIGYF2;GPD2;GRHL2;HEG1;HHEX;HOXA5;KAT2A;KDM6A;LOC102154267;LOC102156972;MTOR;NDUFS6;PALB2;PDE4D;PLAG1;PLEKHA1;PPP1R13L;PTPN11;RARA;RARB;RARG;RC3H2;RMI1;SELENOM;SLC1A2;SLC25A25;SLITRK6;SOS1;SP2;STK40;TAL2;TARBP2;TNKS2;TNS2;TTC8;UNC79;WDR48;WDTC1;WWTR1;XPA;XRCC2;ZFP36L1	58	13536	62	18107	0.00012854	0.0247351
GO:0007030	Golgi organization	biological_process	5	ARFGEF1;ARHGAP21;ARHGEF7;ARL1;ATL2;ATL3;ATP8B1;ATP8B2;ATP8B4;BAG5;BCAS3;BHLHA15;BLZF1;CLASP1;CLASP2;COG4;COG7;CSNK1D;DNAJC28;LOC478405;DYM;FBXW8;GAK;GOLGA5;GOLPH3L;GOLPH3;GORASP1;HACE1;HTT;KIFC3;LMAN1;LOC100686682;LOC100856546;LOC100856290;LOC111095132;LOC111095863;LOC474642;LRRK2;NSFL1C;OBSL1;PLEKHM2;PRKD1;RAB1A;RAB29;RAB2A;RAB30;RAB43;SSTR2;COG1;STX17;SURF4;SYNE1;TANGO2;TBC1D20;TJAP1;TMED10;UBX…	58	13536	63	18107	0.000434717	0.063226
GO:0003697	single-stranded DNA binding	molecular_function	8	BRCA2;C15H16orf87;CNBP;DDX11;ERCC1;ERCC4;ERCC5;FBXO18;HMGB1;HMGB2;HNRNPDL;JCHAIN;LOC100855532;LOC479011;LONP1;LRPPRC;MCM10;MCM4;MCM6;MCM7;MEIOB;MLH1;MLH3;MSH2;MSH3;NABP1;NABP2;SLC39A5;NEIL3;NUP35;PCBP1;PMS1;PMS2;POLR2D;POLR2G;PURA;PURB;RAD51AP1;RAD51B;RAD51C;RAD51D;RAD51;RPA1;RPA2;RPA3;RTF1;SSBP1;SSBP2;SSBP3;SSBP4;SWSAP1;TDP1;TDP2;TEN1;TWNK;SEMA4G;XPC;XRCC2;XRCC3;YBX1	58	13536	64	18107	0.00124823	0.12421
GO:0004843	thiol-dependent ubiquitin-specific protease activity	molecular_function	9	ANKZF1;BAP1;BRCC3;COPS5;CYLD;EIF3F;EIF4A1;SENP3;JOSD1;JOSD2;MYSM1;OTUB1;OTUB2;OTUD1;OTUD3;OTUD4;OTUD5;OTUD7B;OTULIN;STAMBP;TNFAIP3;TNIP1;UCHL1;UCHL3;UCHL5;USP10;USP11;USP12;USP13;USP14;USP15;USP16;USP19;USP1;USP20;USP21;USP22;USP28;USP2;USP31;USP32;USP33;USP34;USP36;USP37;USP38;USP3;USP42;USP45;USP46;USP48;USP49;USP4;USP5;USP7;USP8;VCPIP1;YOD1;ZRANB1	58	13536	64	18107	0.00124823	0.12421
GO:0030336	negative regulation of cell migration	biological_process	9	ABHD2;ABHD6;ADAM15;ADARB1;ARAP3;ARHGAP4;BST2;CHRD;CLIC4;DACH1;DAG1;DLC1;DPEP1;DPYSL3;EPHA1;FLCN;FUZ;GTPBP4;KANK1;LDLRAD4;LOC102151415;LOC482730;MAGI2;MIIP;NF1;NISCH;OSBPL8;PLXNB3;PODN;LOC106558831;PTEN;PTPRJ;PTPRK;PTPRU;RAP2A;RAP2B;RAP2C;RECK;RHOB;RNF20;RNF41;RRAS;SCAI;SFRP1;SINHCAF;SLC9A3R1;SMAD7;SRGAP1;SRGAP2;SRGAP3;STK24;SULF1;TBX5;THY1;TIE1;TP53INP1;VCL;WNT11;WNT4	58	13536	64	18107	0.00124823	0.12421
GO:0042493	response to drug	biological_process	5	APOD;AQP1;ATG5;ATP1A3;BLMH;BLOC1S3;CCND1;CD38;CDK4;CREB1;CTNNB1;DAD1;DRD1;EMX2;FOS;FZD1;GATA4;GATA6;GCLM;GPX3;HADH;HMGB2;HTR2A;INHBA;JUNB;JUND;JUN;KCNJ11;MAPK9;NCKAP1L;NFATC2;NPC1;P2RX7;PAPD7;PDE3A;PNP;PRKCB;PTPRM;RAD54B;RAD54L;RPP21;SFRP1;SLC1A2;SLC1A3;SNCA;SOD1;SRP14;SRP54;SRP68;SRP72;SS18;TGFB2;TGFBR2;THBS1;TOP1;TRPA1;UBE2B;VAV3	58	13536	69	18107	0.0453248	0.92626
GO:0008152	metabolic process	biological_process	3	AADACL4;AADAC;AASDH;ACAA2;ACAT1;ACAT2;ACSF2;ACSM5;ACSS2;ACSS3;AGPAT3;AGPAT4;ARSA;ARSB;ARSD;ARSE;ARSI;ARSJ;ARSK;ASPA;AUH;CDYL2;CDYL;CENPV;DBT;DIP2A;DIP2B;DIP2C;ECHDC1;ECHDC3;ECHS1;ENPP5;GALNS;GSTA4;GSTP1;HADHB;HDHD3;ISOC1;ISOC2;L3HYPDH;CCDC175;LOC100856034;LOC474938;LOC476006;LOC610304;LPGAT1;NANP;NPL;PM20D1;PM20D2;PUDP;STARD9;STS;SUCLA2;SUCLG2;SULF1;TKTL1;TMEM68;UGT1A6	58	13536	73	18107	0.21712	0.92626
GO:0007605	sensory perception of sound	biological_process	9	ADGRV1;ALG10;ALMS1;ASIC2;ATP8B1;CACNA1D;CASP3;CCDC50;CDKN1B;CDKN2D;CEMIP;CHRNB2;CLIC5;COCH;COL1A1;CRYM;DCDC2;DNM1;EYA4;FAM107B;FBXO11;FGFR1;FZD4;GABRB3;HEXA;HEXB;HOXA1;KCNQ4;LOC106560171;LOC111095132;LRIG1;MARVELD2;MYH14;MYO3A;MYO7A;NAV2;P2RX2;PGAP1;RHOA;GPX1;RIPOR2;SIX1;SLC1A3;SLC26A5;SLC9A3R1;SNAI2;SOBP;SOD1;SPRY2;SPTBN4;SRRM4;TBL1X;TFAP2A;THRB;TJP1;TUB;USH1C;WFS1;WHRN	58	13536	94	18107	0.998234	1
GO:0008565	protein transporter activity	molecular_function	5	AP1B1;AP1G1;AP1G2;AP1S1;AP1S2;AP2A1;AP2A2;AP2B1;AP2S1;AP3S1;AP3S2;AP4B1;AP4S1;CALCRL;CHMP7;DSCR3;HIKESHI;IPO11;IPO13;IPO4;TM9SF1;IPO5;IPO7;IPO8;IPO9;ITGB1BP1;KPNA1;KPNA2;KPNA3;KPNA4;KPNA5;KPNA6;KPNB1;NXT1;RAB4A;SPHAR;RAMP1;RAMP2;RANBP6;RANGRF;RAP1A;SEC61G;SEC62;SNUPN;TIMM10;TIMM9;TMCO6;TNPO1;TNPO2;TNPO3;TOMM5;USO1;VPS26A;VPS26B;VPS29;VPS35;XPO1;XPO6;ZFYVE16	57	13536	61	18107	0.000161596	0.0292934
GO:0007049	cell cycle	biological_process	5	ANAPC15;ANAPC16;ARL2;AVPI1;BCCIP;BLCAP;BOD1;BRCA1;BRCC3;CCND2;CCND3;CCNE2;CDK2;CDK5;CDK6;CINP;CKS1B;CREBL2;DAB2IP;ERH;FOXN3;GNAI1;GNAI2;LIN37;LIN52;LIN54;LIN9;LOC100682773;LOC100684429;LOC100688940;MAEA;MCTS1;MNAT1;MTUS1;NSMCE2;PARD3B;PARD3;PARD6G;PDS5B;PFDN1;PPP1CA;PPP1CB;PPP1CC;PRKCE;RABGAP1;GPR21;RBL1;RBL2;SENP5;SEPT11;SEPT2;SEPT3;SPECC1L;SPOUT1;TERF2;TLK1;TLK2;VPS4A	57	13536	63	18107	0.00152375	0.144387
GO:0014069	postsynaptic density	cellular_component	4	ADAM10;ADGRB1;ALS2;ANKS1B;AXIN1;AXIN2;CACNA1C;CAMK2G;CDK5;CNIH2;CPEB4;CRIPT;DCLK1;DISC1;DLG1;DLG2;DLG3;DLG4;DTNBP1;EPS8;FBXO45;FXR1;GAP43;GRIA1;GRIA3;GRIA4;HOMER3;ITPR1;KCNAB2;LIN7C;LOC111090913;LOC111097376;LOC477516;LZTS3;MACF1;MAGI2;MAPT;MPP2;NCS1;NETO2;NEURL1;NPTN;LOC111093395;NSMF;PCLO;PDE4B;PKP4;PPP1R9A;PPP1R9B;RGS19;RGS20;SAMD14;SEMA4C;SH2D5;SHANK2;SRGAP2;SYN1;SYNDIG1	57	13536	69	18107	0.082281	0.92626
GO:0005929	cilium	cellular_component	6	ANKS6;ARL2BP;ARL6;ATP6V1D;BBS12;BBS9;C18H11orf74;CAV1;CEP131;CFAP100;CFAP20;CFAP221;CLUAP1;DLD;DYNLL1;EVC2;FAM161B;FAM49B;GAS8;HSPB11;IFT122;IFT20;IFT22;IFT43;IFT46;IFT57;IFT74;IFT80;IFT81;IFT88;KIF27;KIF3B;KIF7;LCA5;LOC106559190;LRRC6;MYOC;NAXE;ODF2;PDE1C;PKM;TMEM138;TNPO1;TOGARAM1;TRAF3IP1;TRIM59;TTC21A;TTC21B;TTC30A;TTC30B;TUBB4A;TUB;TULP3;TULP4;UBXN10;WDR19;LOC111095293;WDR60	57	13536	70	18107	0.123235	0.92626
GO:0020037	heme binding	molecular_function	6	ABCB6;ADGB;CAT;CBS;CYB5A;CYB5B;CYB5D2;CYB5R4;CYBA;CYBB;CYC1;CYGB;CYP1A1;CYP1B1;CYP26B1;CYP27A1;CYP27C1;CYP2C18;CYP2J2;CYP2R1;CYP2S1;CYP2U1;CYP39A1;CYP4A37;CYP51A1;CYP7B1;FLVCR2;GUCY1A2;GUCY1A3;GUCY1B3;HMOX1;IDO1;JAK2;LOC100686469;LOC100855540;LOC100855558;LOC102152484;LOC111097728;LOC476453;LOC480784;LOC484867;LOC485619;LOC609402;NOS1;NOS2;NOS3;NR1D1;PGRMC1;PGRMC2;PTGS1;PTGS2;PXDNL;PXDN;SRC;STC2;…	57	13536	92	18107	0.997721	1
GO:0047485	protein N-terminus binding	molecular_function	5	ACOX1;ALG2;APTX;ARF6;BIRC2;CFAP36;CHMP6;CSNK2A1;CSNK2A2;DAXX;EIF3E;ERCC2;ERCC3;ERCC4;ERCC6;EXOC2;EXOC4;EXOC5;GLRX;GTF2H3;HAX1;KCNIP1;LOC489420;MAP2K1;MAU2;MECP2;MEN1;MNAT1;MYO7A;NCOA1;PDCD10;PEX19;PHB2;PPP1CC;RASSF1;RBPJ;RELA;SMARCA4;SMARCC1;SMARCE1;SNF8;SRRM2;STX5;SUV39H1;SYNGR3;TAF11;TARBP2;THAP7;TP53;TRAF6;TSC1;UNC13A;VPS25;VWF;YWHAQ;ZWINT	56	13536	61	18107	0.000666079	0.0855084
GO:0051082	unfolded protein binding	molecular_function	5	AIP;CALR3;CALR;CANX;CCT2;CCT3;CCT4;CCT5;CCT6A;CCT7;CCT8;CDC37L1;CDC37;CRYAB;DNAJA1;DNAJA2;DNAJA3;DNAJA4;DNAJB11;DNAJB1;DNAJB4;DNAJB5;DNAJB6;GRPEL1;GRPEL2;HEATR3;HSP90AA1;HSP90AB1;HSP90B1;HSPA2;HSPA5;HSPA9;HSPE1;LOC100684448;LOC100684696;LOC100856782;LOC102151313;LOC102152612;LOC102156762;LOC474850;LOC480059;LOC609748;MKKS;LOC102153017;PDRG1;PFDN1;PFDN2;PFDN5;PFDN6;SERPINH1;SYVN1;TCP1;TMEM67;TOMM2…	56	13536	65	18107	0.0194062	0.68078
GO:0016055	Wnt signaling pathway	biological_process	8	AMER2;APC2;ARL6;BCL7B;CCDC88C;CCNE1;CELA1;CPE;CSNK1A1;CSNK1D;CSNK1E;CSNK1G2;CSNK1G3;CSNK2A1;CSNK2A2;CTNNB1;CUL3;DDB1;DDIT3;DIXDC1;DVL3;FERMT2;FZD4;GRK6;INVS;KLHL12;KREMEN1;LDB1;LOC102154267;LOC106557595;LOC476317;LZTS2;MACF1;MARK2;NLK;PITX2;PPM1A;PYGO1;RYK;STRN;TCF7;TLE2;TLE3;TNKS2;TNKS;TRABD2B;WLS;WNT11;WNT2;WNT3;WNT4;WNT5B;WNT7B;WNT9A;WWOX;ZRANB1	56	13536	70	18107	0.192475	0.92626
GO:0006898	receptor-mediated endocytosis	biological_process	8	ACKR2;ACKR4;ADRB2;APOBR;APOE;CANT1;CD163;CD5L;CD6;CFI;CLTCL1;CUBN;CXCL16;DAB2;DBNL;DMBT1;ENPP1;ENPP2;FCGR1A;HHIPL1;CYP46A1;HPN;LDLRAD3;LOC111098945;LOC610335;LOXL2;LOXL3;LOXL4;LRP10;LRP1B;LRP2;LRP3;MARCO;MICALL1;MRC1;MSR1;OLR1;PLA2R1;PPT1;PRG4;PRSS12;SBSPON;SCARA5;SCARB1;SCARF1;SNX17;SNX9;SSC5D;STAB1;SUSD2;TFRC;TINAGL1;TINAG;TMPRSS13;TMPRSS2;VLDLR;VTN	56	13536	73	18107	0.409297	0.92626
GO:0030246	carbohydrate binding	molecular_function	4	ADGRL1;ADGRL2;ADGRL3;CALR;CD34;CLEC1A;CLEC7A;CNTN1;CNTN2;CRYBG3;EMC7;EVA1C;FBXO2;FBXO6;GAA;GALM;GALNT10;GALNT11;GALNT12;GALNT13;GALNT15;GALNT16;GALNT17;GALNT18;GALNT1;GALNT2;GALNT3;GALNT4;GALNT5;GALNT6;GALNT7;GALNT9;GANAB;GANC;GCKR;GFPT1;GFPT2;LGALS12;LGALS1;LGALS2;LGALS3;LGALS8;LGALS9;LGALSL;LMAN2;LOC100687463;LOC102152620;LOC102155379;LOC489992;MAN2A1;MAN2A2;MAN2B1;MAN2C1;MGAM2;MGAM;REG3A	56	13536	79	18107	0.82297	0.972031
GO:0070588	calcium ion transmembrane transport	biological_process	7	ASIC1;SMARCD1;ASPH;ATP2A1;ATP2A2;ATP2A3;ATP2B1;ATP2B4;ATP2C1;ATP2C2;CACNA1A;CACNA1B;CACNA1C;CACNA1D;CACNA1G;CACNA1H;CACNA2D2;CACNA2D3;CACNB1;CACNB2;CACNB3;CACNB4;CACNG5;CATSPER3;CUL5;DENND5A;DENND5B;GAS6;ITGAV;ITPR1;ITPR3;LOC111098223;LOC476820;NCS1;ORAI1;ORAI2;PANX1;PKD1L1;PKD1L3;PKD1;PKDREJ;PSEN1;SLC24A3;SLC25A25;SLC8A1;SLC8A2;SLC8A3;STIM2;TMEM37;TRPA1;TRPC1;TRPC4;TRPM3;TRPM4;TRPM7;TRPM8;TRPV1;…	56	13536	87	18107	0.988865	1
GO:0000922	spindle pole	cellular_component	10	AUNIP;BIRC6;BOD1;BRCC3;CALM3;CDC14A;CDC6;CEP128;CEP19;CEP44;CEP89;CEP95;CKAP5;CSPP1;CTDP1;CTNNB1;DCTN1;DDX11;DYNC1I1;DYNC1LI1;FAM110A;IKBKG;KATNA1;KATNB1;KIF11;KIF2A;KNTC1;LATS1;LATS2;MAD1L1;MAPK14;MTCL1;NEDD1;NEDD9;NEK2;ODF2;PKP4;PLK1;POC1A;POC1B;PPP2CA;PSRC1;RAB11A;SBDS;SMC3;SPDL1;TPX2;TUBGCP2;UMOD;UNC119;VPS4A;VPS4B;WDR62;WDR73;ZW10	55	13536	57	18107	1.24144e-05	0.00388198
GO:0016485	protein processing	biological_process	7	ADAM10;ADAMTS2;ADAMTS3;AEBP1;APH1A;APH1B;ATG4A;ATG4B;ATG4C;ATG4D;C2CD3;CASP2;CASP3;CASP7;CLN3;CMA1;CPD;CPM;CPXM1;CPXM2;CPZ;CTSS;FKRP;FURIN;IDE;IFT172;LOC102157317;LOC111095863;LOC479815;LOC487429;LOC608455;LONP2;METAP2;NCSTN;P2RX7;PARL;PCSK1;PCSK2;PCSK4;PCSK6;PCSK7;PITRM1;PMPCB;PPP2R5C;PSEN1;PSEN2;PTCH1;RHBDF1;RHBDF2;RHBDL1;RHBDL2;RHBDL3;SRGN;TYSND1;XPNPEP3	55	13536	62	18107	0.00543057	0.311585
GO:0007010	cytoskeleton organization	biological_process	5	ABLIM1;ARHGAP10;AVIL;CTDSP2;BRWD1;BRWD3;C31H21orf2;CAMSAP1;CAP2;CAPZB;CCL24;CCL2;CCL7;CNTNAP1;DOCK1;DPYSL2;DST;ELMO2;FITM2;GAN;HCK;LIMD1;LOC111090913;MAEA;MAP3K20;MAST1;MAST2;MAST3;MAST4;MICAL2;NECTIN2;PALM;PCLO;PDZD8;PHIP;PRPF40A;PSTPIP2;PTK2B;PTK2;QRICH1;RP2;SH3D19;SH3KBP1;SIPA1L3;SOX9;STRIP2;SVIL;THY1;UGT8;VILL;WTIP;ZMYM2;ZMYM3;ZMYM4;ZMYM6;LOC111090138;ZRANB1	55	13536	62	18107	0.00543057	0.311585
GO:0032259	methylation	biological_process	4	AMT;AS3MT;ASMTL;BUD23;CARNMT1;COMTD1;COMT;COQ3;COQ5;DPH5;ECE2;FAM103A1;FAM53B;EEF1AKMT2;GAMT;GNMT;HNMT;KIAA1456;KMT2D;LOC106560171;LOC480074;VAMP4;LOC489396;METTL12;METTL13;METTL18;METTL21A;METTL23;METTL24;METTL25;METTL27;METTL4;METTL5;METTL6;METTL7A;MGMT;MTAP;MTR;N6AMT1;NDUFAF5;NOP2;NSUN4;NSUN5;NSUN6;NSUN7;PEMT;RRP8;SETD9;SMYD4;SMYD5;SPOUT1;TPMT;TRMT10B;TRMT11;TYMS;TYW3;ZCCHC4	55	13536	64	18107	0.0226421	0.727739
GO:0007229	integrin-mediated signaling pathway	biological_process	8	ADAM11;ADAM15;APOA1;BCAR1;COL3A1;CTDSPL;ITGA9;CTGF;CUL3;FCER1G;FERMT2;FERMT3;FGR;FUT8;ILK;ITGA10;ITGA11;ITGA1;ITGA2;ITGA3;ITGA5;ITGA6;ITGA7;ITGA8;ITGAM;ITGAV;ITGAX;ITGB1BP1;ITGB1;ITGB2;ITGB3;ITGB4;ITGB5;ITGB6;ITGB7;ITGB8;LAMA5;LOC102153796;LOC102156677;LOC102156915;LOC111094296;MPIG6B;P2RX5;ITGAE;PLEK;PRKD1;PTK2B;PTK2;PTPN11;RCC2;SEMA7A;SRC;SYK;TEC;VAV1;VAV3;ZYX	55	13536	66	18107	0.0670253	0.92626
GO:0006979	response to oxidative stress	biological_process	5	ABL1;ALS2;APOE;APP;ATOX1;CAMK2G;CHRNA4;DHCR24;ERCC1;ERCC2;ERCC3;ERCC8;ETFDH;GAB1;GCLC;GCLM;GPX2;GPX3;GPX7;GPX8;HMOX1;HNF1A;IDH1;LIAS;MSRA;MSRB1;MSRB3;MTF1;NAPRT;NDUFA12;NDUFA6;NDUFB4;NDUFS2;NEIL1;NQO1;OGG1;OXSR1;PNKP;PRDX6;PRKN;PRNP;PSEN1;PSIP1;PSMB5;PTGS1;PTGS2;PXDNL;PXDN;RRM2B;SELENOK;SELENOP;SRXN1;STC2;TXNIP;XPA	55	13536	68	18107	0.152121	0.92626
GO:0019905	syntaxin binding	molecular_function	6	ABCA1;ABL1;C2CD4A;CACNA1A;CPLX1;CPLX2;DOC2B;HECTD3;LLGL1;LLGL2;LOC100686682;LOC474642;LOC611813;NAPA;NAPB;NAPG;PTPN2;RPH3AL;SNAP23;SNAP29;SNAP47;STX10;STX16;STX6;STX7;STXBP3;STXBP4;STXBP5L;STXBP5;SYT11;SYT12;SYT13;SYT14;SYT16;SYT1;SYT2;SYT3;SYT4;SYT5;SYT6;SYT7;SYT9;SYTL1;SYTL2;SYTL3;SYTL4;SYTL5;TC2N;TMED10;TXLNA;TXLNG;VAMP2;VPS18;VPS52;VPS54	55	13536	68	18107	0.152121	0.92626
GO:0032496	response to lipopolysaccharide	biological_process	7	ABR;ACP5;ADAM17;AKIRIN2;BDKRB1;CXCL10;CXCL8;DUSP10;ERBIN;F2R;FAS;FER;GCH1;HMGB2;HNRNPA0;HSF1;IDO1;IL12RB2;IRAK3;JUNB;JUND;JUN;KCNJ8;LBP;LIAS;LOC100688321;LOC102153861;LOC102154078;LOC106557449;LOC609235;MAPKAPK2;MAPKAPK3;NGFR;NOCT;OTUD5;P2RX7;PALM3;PELI1;PLCG2;PTGER2;PTGER4;PTGFR;PTGIR;RELT;SLC11A1;SLPI;SNCA;TNFRSF11A;TNFRSF11B;TNFRSF14;TNFRSF1A;TNFRSF1B;TNFRSF21;TNFRSF25;TPM3	55	13536	77	18107	0.791755	0.968346
GO:0071805	potassium ion transmembrane transport	biological_process	7	ABCC9;AQP1;HCN2;HCN3;HCN4;HPN;KCNA1;KCNA3;KCNA6;KCNAB1;KCNAB2;KCNB1;KCNC4;KCND1;KCND2;KCNE3;KCNE4;KCNF1;KCNG1;KCNG3;KCNH2;KCNH6;KCNIP1;KCNK16;KCNK1;KCNK2;KCNK3;KCNK5;KCNK6;KCNMA1;KCNMB1;KCNMB2;KCNMB4;KCNN1;KCNN2;KCNN3;PMVK;KCNN4;KCNQ3;KCNQ4;KCNS3;KCNT2;KCNU1;LOC102156059;LOC106558987;LOC490277;MTMR6;PKD2;REST;SLC12A4;SLC12A6;SLC12A7;SLC12A9;SLC9A8;TMEM175;TRPM5	55	13536	94	18107	0.999821	1
GO:0051087	chaperone binding	molecular_function	5	AHSA1;ALB;AMFR;NUDT21;ATP1A3;BAG1;BAG2;BAG3;BAG4;BAG5;CDC37L1;CDC37;CLU;CP;DNAJA1;DNAJA2;DNAJA4;DNAJB1;DNAJB4;DNAJB5;DNAJB6;DNAJC10;DNAJC1;DNAJC3;DNLZ;GET4;GNB5;GRPEL1;GRPEL2;HSCB;CCDC117;HSPE1;HYOU1;LOC100684448;LOC100684696;LOC102151313;LOC488636;LOC609748;PACRG;PFDN4;PFDN6;PRKN;RNF207;SACS;SLC25A17;SOD1;SYVN1;TIMM10;TIMM44;TIMM9;TP53;TSACC;TSC1;UBL4A;USP13;VWF	54	13536	59	18107	0.00101542	0.112397
GO:0001666	response to hypoxia	biological_process	5	ADAM17;ADA;AJUBA;ALKBH5;ARNT2;ASCL2;BMP2;CAMK2D;CAMK2G;CAV1;CBFA2T3;CHRNA4;CHRNB2;CLDN3;CRYAB;CXCL12;CXCR4;DDIT4;DPP4;EDN1;EDNRA;EP300;ERCC2;FUNDC1;HSF4;HSP90B1;ITPR1;ITPR2;LIMD1;LOC102152029;LOXL2;MECP2;MMP2;NF1;NOS1;NOS2;NR4A2;P2RX2;PLAU;PLOD1;PLOD2;PML;PRKCB;SCAP;SLC11A2;SLC2A8;SMAD3;SMAD4;SRF;TGFB2;TGFB3;UCP2;USF1;WTIP	54	13536	64	18107	0.0464603	0.92626
GO:0034220	ion transmembrane transport	biological_process	6	ANXA6;AQP10;AQP4;AQP5;AQP8;AQP9;ASIC2;ATP2B1;ATP6V1D;CACNA1G;CALHM2;CALHM5;CALHM6;CATSPER3;CCDC154;CLCN7;CLCN2;CLCN3;CLCN5;CLCN6;CLCNKA;DLG1;DLG4;FXYD1;FXYD2;FXYD3;FXYD5;FXYD6;GABRA3;GABRE;GJA1;GRIA1;GRIA2;GRIA3;GRIA4;GRID2;GRIK3;GRIK4;GRIN1;LOC607978;NALCN;PIEZO1;PIEZO2;SFXN1;SFXN2;SFXN3;SFXN4;SFXN5;SGK3;SLC16A10;SLC16A2;SLC9B2;TRPV4;TSC22D3;UNC80	54	13536	85	18107	0.992401	1
GO:0071260	cellular response to mechanical stimulus	biological_process	6	ANKRD1;AQP1;BAD;BAG3;BAK1;BCL10;BNIP3;CASP2;CASP8;CD40;CHEK1;COL1A1;CRADD;FADD;FAM227A;GADD45A;HABP4;IRF1;LOC102151615;LOC102151812;LOC102153553;LOC102154270;LOC102154664;LOC102155568;LOC102156502;LOC102156665;LOC102157331;LOC106558034;LOC106558374;LOC106558823;LOC106559437;LOC111090201;LOC111090312;LOC111091236;LOC111092180;LOC111092398;LOC111093339;LOC111096242;LOC111097161;LOC111097271;MAP2K4;…	54	13536	139	18107	1	1
GO:0017124	SH3 domain binding	molecular_function	6	ABI2;ABL1;ADAM15;ARHGAP31;ARHGAP6;CASP9;CBLC;CBL;CCDC6;CD2AP;CD3E;CIT;CRB3;CTTNBP2;CYBA;DAB2IP;DENND1A;DNM2;DPYSL3;EFS;ELMO1;ENAH;EVL;FMN1;GRB2;HCLS1;INPP5D;LANCL1;LYN;MAPT;MICAL1;NCF1;NOXA1;OSTF1;PAK3;PRKN;PTPN12;PTPN22;PTPN6;QKI;RAD9A;RHOA;GPX1;SGIP1;SH3BGRL2;SH3BGRL;SH3BP2;SH3BP5L;SH3BP5;SHANK2;SHANK3;UVRAG;VASP;WAS	53	13536	55	18107	2.07871e-05	0.00590921
GO:0016874	ligase activity	molecular_function	4	AREL1;ARIH1;BIRC3;BRCA1;CNOT4;G2E3;HACE1;HECTD1;HECTD2;HECTD3;HECTD4;HECW2;HERC1;HERC3;HERC4;HERC5;HERC6;HUWE1;ITCH;LOC479005;MARCH1;MDM2;MID2;MYLIP;NEDD4L;NEDD4;NEURL1B;NSMCE2;PCCB;PDZRN3;PELI3;PRKN;RING1;RNF130;RNF182;RNF8;SIAH1;SIAH2;STUB1;SUCLA2;SUCLG2;TRIP12;UBE2I;UBE3A;UBE3B;UBE3C;UBE3D;UBR5;UCHL1;WWP1;WWP2;ZFP91;CNTF;ZNRF1	53	13536	58	18107	0.00125123	0.12421
GO:0016605	PML body	cellular_component	14	ANKRD2;ATRX;CBX5;CDK9;CHEK2;CHFR;ZNF605;DAPK3;DAXX;EIF3E;ELF4;HIPK1;HIPK2;HIPK3;IKBKE;KAT6A;KLHL20;LOC102152029;LRCH4;MAPK7;MORC3;MTOR;N4BP1;NR2C1;NSMCE2;PIAS1;PML;RAD51;RNF4;RNF6;RPA1;RPA2;RPAIN;SATB1;SENP2;SIRT1;SKIL;SMC6;SPTBN4;SQSTM1;ST8SIA5;PIAS2;SUMO1;SUMO3;TDG;TDP2;TENM2;TOP3A;TOPBP1;TP53;TRIM8;UBE2I;WDFY3;ZBTB16;ZMYM2	53	13536	58	18107	0.00125123	0.12421
GO:0051091	positive regulation of DNA binding transcription factor activity	biological_process	13	AKT1;ANXA3;ARHGEF5;ATF2;CEBPB;COPS5;CTNNB1;DDR2;DVL2;EP300;ESR1;ESR2;FZD1;FZD2;FZD4;GTF2A2;HDAC4;HDAC5;HIPK2;HMGN3;IL6;KDM1A;KIT;LOC111094605;LOC488347;LRP5;LRP6;MAVS;MBTPS2;MID2;NDP;NEUROD1;NKX2-2;PHB2;PLPP3;PPARGC1A;PPARGC1B;PPARG;PPP3CA;PPRC1;PTEN;RGCC;RNF41;SAV1;SMARCA4;SMARCB1;SRF;STK3;TAF12;TCF3;TRIM21;TRIM27;WNT2	53	13536	63	18107	0.0532585	0.92626
GO:0010468	regulation of gene expression	biological_process	7	ALKBH1;APBA2;APOE;ASIC2;ATP1B1;ATXN7L3B;CAD;ATRAID;CDK2;CDK4;DDX39A;DDX39B;DDX46;EIF4A1;SENP3;EIF4A2;EIF4A3;FAM46A;FUT8;HNRNPDL;KDM4C;MAP3K4;MAPK11;MAPK8IP3;MAPK9;MARF1;MCPH1;MEGF8;MSANTD1;NF1;NIPBL;PIK3CA;PLCG2;POFUT2;PPP2CB;RARG;RICTOR;ROM1;SAP130;SART3;SCARA5;SHC4;SLC4A5;SORT1;STK40;STXBP5;TC2N;TCF15;TGFBR1;TGFBR2;TOB2;TSHZ1;TSHZ2;TSKU;VAV2	53	13536	63	18107	0.0532585	0.92626
GO:0060070	canonical Wnt signaling pathway	biological_process	9	BCL9L;BCL9;CCND1;CHD8;CTNNB1;DISC1;DIXDC1;DVL1;DVL2;DVL3;FRZB;FZD10;FZD1;FZD2;FZD3;FZD4;FZD5;FZD7;FZD9;GLI1;HOXB9;KDM6A;KLF4;LEF1;LOC111091360;LRP5;LRP6;MED12;NDP;OTULIN;PLPP3;PORCN;PTEN;PTPRU;PYGO2;SDC1;SFRP1;SFRP2;SFRP4;SFRP5;SMO;SNAI2;SOX4;STK11;TBL1X;TCF7L1;TCF7L2;UBE2B;WNT11;WNT2;WNT4;WNT7B;ZNRF3	53	13536	65	18107	0.130164	0.92626
GO:0030018	Z disc	cellular_component	13	ACTN1;ACTN2;ACTN4;AHNAK2;ATP2B4;BAG3;BIN1;LOC111091071;C38H1orf226;CACNA1D;CAPN3;CAPZB;CRYAB;CTNNB1;DES;DMD;DNAJB6;FBXO32;FHL3;FKBP1B;GLRX3;HOMER1;HRC;HSPB1;ITGB1BP2;JPH1;KCNN2;KRT19;LOC100684448;LOC102151313;LOC102153142;LOC106558660;LOC490881;LOC607207;MYL12B;LOC609484;LOC610874;LOC612942;CAVIN4;MYH7;MYL9;NEBL;NEB;NEXN;LOC106558915;NOS1;PDE4B;PGM5;PPP2R5A;PPP3CA;PPP3CB;PSEN2;SCN3B;SRI;STUB1;SYN…	53	13536	70	18107	0.490283	0.92626
GO:0071222	cellular response to lipopolysaccharide	biological_process	8	ABCA1;ABL1;ANKRD1;B2M;CACTIN;CCR5;CD14;CD180;CD36;CD80;CD86;CDC73;CMPK2;CTR9;CXCL10;CXCL16;CXCL8;DAB2IP;GFI1;HAVCR1;HNRNPM;IL6;IRF8;LBP;LOC102157048;LOC111092487;MAPK8;MEF2C;MRC1;NFKB1;NFKBIB;NFKBIL1;NLRP3;NOS2;NR1D1;NR1H3;PAF1;PDE4B;PDE4D;PLSCR3;PLSCR4;RARA;RELA;SBNO2;SELENOS;SERPINE1;SHPK;SPON2;STAP1;TNFRSF1B;TNIP2;TRAF6;ZC3H12A	53	13536	78	18107	0.932455	0.99779
GO:0007268	chemical synaptic transmission	biological_process	7	APBA1;APBA2;BSN;CACNA1G;CACNB1;CACNB2;CACNB3;CACNB4;CTNNB1;DLG1;DLG2;DLG3;DLG4;DTNA;FGF12;GIPC1;GJD2;GLS;GPR1;GRIA1;GRIA3;GRIA4;HTR1B;HTR1D;HTR7;KCNMB2;KCNMB4;KCNQ3;LOC106557821;LOC487172;LOC100855970;LOC487173;LRP6;MINK1;LOC111096071;NPY2R;NRXN1;PAFAH1B1;PENK;PLCB3;PPT1;SDCBP;SLC12A4;SLC12A6;SLC12A7;SLC6A13;SLC6A1;SLC6A4;SNAP91;SNCG;SSTR1;SSTR2;COG1;SSTR3;TPGS1;USP14	53	13536	90	18107	0.999689	1
GO:0006260	DNA replication	biological_process	9	BLM;CHRNA10;NUP98;CHTF8;CINP;DNAJC2;FAM111A;FHIT;GINS3;ING4;ING5;INO80E;KAT7;KIN;LOC100855532;MCM5;MCM8;MCM9;MCMDC2;NFIA;NFIB;NFIC;NFIX;NOL8;ORC2;ORC3;ORC5;ORC6;PIF1;POLD2;POLD3;POLE;POLG2;POLQ;RAB4A;SPHAR;RECQL4;RECQL5;REV3L;RFC1;RFC5;RPA1;RPA2;RPA3;RRM1;RRM2;SET;SLX4;SSBP1;TBRG1;TICRR;TOP1;UPF1;WRNIP1	52	13536	53	18107	3.71475e-06	0.001452
GO:0004004	ATP-dependent RNA helicase activity	molecular_function	11	DDX10;DDX17;DDX18;DDX19A;DDX19B;DDX1;DDX20;DDX21;DDX23;DDX24;DDX25;DDX27;DDX28;DDX31;DDX39A;DDX39B;DDX42;DDX46;DDX47;DDX49;DDX50;DDX51;DDX52;DDX54;DDX56;DDX59;DDX5;DDX6;DHX15;DHX16;DHX30;DHX32;DHX33;DHX34;DHX35;DHX36;DHX37;DHX38;DHX40;DHX57;DHX8;DHX9;DQX1;EIF4A1;SENP3;EIF4A2;EIF4A3;HELB;SNRNP200;SUPV3L1;TDRD12;UPF1;YTHDC2	52	13536	56	18107	0.000499465	0.0716406
GO:0000784	nuclear chromosome, telomeric region	cellular_component	13	ATRX;CBX1;CBX5;CDC73;CDK1;DCLRE1A;DCLRE1B;DCLRE1C;DDB1;DNA2;ERCC1;ERCC4;FEN1;GAR1;HMBOX1;LOC106558262;LOC100856216;LOC477937;LOC481514;LOC489024;MCM3;MCM4;MCM5;MCM6;MCM7;MSH2;NABP1;NABP2;SLC39A5;NAT10;NBN;NHP2;ORC2;ORC3;ORC4;ORC5;PCNA;PIF1;PRKDC;RAD50;RAD51D;RAD51;RPA1;RPA2;SLX4;SSB;SUN2;TERF1;TERF2;TNKS2;TNKS;WRN;XRCC5;XRCC6	52	13536	62	18107	0.0609118	0.92626
GO:0030165	PDZ domain binding	molecular_function	6	ACOX1;ACVR2A;ADAM17;ARHGAP29;ATP2B1;ATP2B4;CCDC88C;CFTR;CIT;CLCN3;CRIM1;CRIPT;CXADR;CXXC4;DLG2;DLG4;DOCK4;DTNA;ERC1;EXOC4;F11R;FZD1;FZD2;FZD3;FZD4;FZD7;GNG12;GRID2;KCNJ4;KIDINS220;KIF14;LLGL2;LNX1;LNX2;LOC609484;MAGI2;MAP2K2;MPP2;NKD1;PLEKHA1;PRKN;PSEN1;PTEN;RAPGEF2;SDC2;SLC22A4;SLC22A5;SLC9A3R1;SSTR2;COG1;TBC1D10A;TMEM88;USHBP1	52	13536	67	18107	0.352675	0.92626
GO:0090305	nucleic acid phosphodiester bond hydrolysis	biological_process	8	AEN;ANKLE1;APEX1;APEX2;APLF;APTX;ASTE1;C15H16orf87;DCLRE1A;DCLRE1B;DCLRE1C;DDX1;DNA2;DNASE1L1;DNASE1;EME1;ENPP1;ENPP2;ERCC5;EXD1;EXD2;EXD3;EXO1;FANCM;G3BP1;GEN1;HAUS3;POLN;HAUS7;TREX2;LOC100685881;LOC102155331;LOC106558526;LOC111098491;LOC482454;EXO5;MEIOB;MRE11;N4BP2;POLA1;POLD1;POLE;POLG;RAD1;RAD50;RAD9A;REV3L;REXO2;RIDA;SLX1A;SND1;TREX1;ATRIP;WRN;XRN1;ZRANB3	52	13536	85	18107	0.998064	1
GO:0004888	transmembrane signaling receptor activity	molecular_function	5	ANTXR1;CD247;CD3D;CD3E;CD3G;FAM227A;LGR5;LOC100685881;LOC102151615;LOC102151812;LOC102152675;LOC102153274;LOC102153553;LOC102154020;LOC102154270;LOC102154664;LOC102155568;LOC102156502;LOC102156665;LOC102157331;LOC106558034;LOC106558374;LOC106558823;LOC106559437;LOC111090201;LOC111090312;LOC111091236;LOC111092180;LOC111092398;LOC111093277;LOC111093339;LOC111094759;LOC111096242;LOC111096244;LOC1110…	52	13536	200	18107	1	1
GO:0003727	single-stranded RNA binding	molecular_function	7	A1CF;AGO2;AGO3;CBX4;CBX7;CBX8;CNBP;DDX58;DHX58;DLX2;ENDOV;FAM227A;HMGB1;HNRNPF;IFIH1;JMJD6;L1TD1;LOC102151615;LOC102151812;LOC102152414;LOC102153553;LOC102154270;LOC102154664;LOC102155568;LOC102156352;LOC102156502;LOC102156665;LOC102157331;LOC106558034;LOC106558374;LOC106558431;LOC106558823;LOC106559437;LOC111090201;LOC111090312;LOC111091236;LOC111092180;LOC111092398;LOC111093339;LOC111095184;LOC…	52	13536	164	18107	1	1
GO:0000776	kinetochore	cellular_component	9	AURKB;TRNAD-GUC;BOD1;BUB3;CBX5;CENPC;CENPE;CENPH;CENPI;CENPO;CENPT;CENPW;CHRNA10;NUP98;CLASP1;CLASP2;DCTN1;DCTN2;DYNC1I1;DYNC1LI1;DYNLL1;DYNLT3;INCENP;KAT2B;KAT8;KIF18A;KIF2C;KNSTRN;MAD1L1;MEAF6;MTBP;NDE1;NDEL1;NEK2;NUP107;NUP160;NUP37;NUP43;NUP85;PAFAH1B1;PSEN1;PSEN2;RANGAP1;SEC13;SEH1L;SMC1A;SPAG5;SS18L1;SUMO3;WDR43;WDR81;XPO1;ZWINT	51	13536	55	18107	0.000623787	0.0837345
GO:0007050	cell cycle arrest	biological_process	7	AK1;APBB2;CALR;CDC123;CDKN2A;CDKN2B;CDKN2C;CDKN2D;CDKN3;CUL5;CXCL8;DDIAS;DDIT3;DST;ERN1;ERN2;FOXO4;GAS2L1;GAS2L3;GAS2;GAS7;HRAS;ING4;INHBA;IRF1;LOC102152029;MACF1;MAP2K1;MAP3K20;MLF1;MSH2;NOTCH2;PKD1;PKD2;PML;PPM1G;RASSF1;SKIL;SMAD3;STK11;TBRG1;TCF7L2;TGFB1;TGFB2;THBS1;TP53INP1;TP53;TP73;TSG101;UHMK1;ZBTB49	51	13536	59	18107	0.022354	0.727739
GO:0060021	palate development	biological_process	5	ACVR2B;ALX1;ALX4;ASPH;BCOR;BMPR1A;BNC2;C4H5orf42;CCNA2;BBS7;CSRNP1;DHRS3;EPHB2;EPHB3;GABRB3;GDF11;HAND2;IFT172;INHBA;INSIG1;INSIG2;LEF1;LRP6;MEF2C;MEOX2;MSC;MSX1;NPRL3;OSR1;OSR2;PAK1IP1;PDGFRA;PLEKHA1;PRDM16;PRRX1;PYGO2;SATB2;SGPL1;SMAD2;SMAD4;SNAI1;SNAI2;SOS1;SUMO1;TBX3;TCF21;TFAP2A;TGFBR2;TIPARP;WDPCP;WFIKKN2;WNT11	51	13536	63	18107	0.16132	0.92626
GO:0005635	nuclear envelope	cellular_component	11	ABCF1;ALOX5AP;ANXA11;ANXA7;BAX;BNIP1;BNIP3L;BNIP3;CAD;ATRAID;CSE1L;DDX19B;DHRS2;DNASE1;ELAVL4;FAF1;GMCL1;GPER1;HTATIP2;IPO11;IPO7;IPO8;IPO9;LOC100686305;LOC111097621;MNS1;MTA1;MTMR6;NEMP1;NPC1;NRM;NSMF;PARP11;PARP16;PLPP7;POLA1;POLR2M;PRKCZ;RAC2;RTN4;S100A6;SEH1L;SIGMAR1;SUN1;SUN2;TERF2IP;TMPO;TNKS2;TOR1AIP1;TOR1A;TOR1B;WDFY3	51	13536	63	18107	0.16132	0.92626
GO:0031463	Cul3-RING ubiquitin ligase complex	cellular_component	9	BACH1;BACH2;BTBD19;CUL3;ENC1;GAN;GLMN;GRK7;RNF7;IPP;KBTBD12;KBTBD2;LOC106559695;KBTBD3;KBTBD7;KBTBD8;KCTD10;KCTD13;KCTD17;KEAP1;KLHDC7A;KLHL12;KLHL13;KLHL15;KLHL17;KLHL18;KLHL20;KLHL21;KLHL22;KLHL24;KLHL25;KLHL26;KLHL28;KLHL29;KLHL2;KLHL31;KLHL32;KLHL34;KLHL36;KLHL3;KLHL40;KLHL42;KLHL5;KLHL7;KLHL8;KLHL9;LOC102153124;LOC106559696;LOC488392;PHOSPHO2;RBX1;SPOPL;SPOP;TNFAIP1	51	13536	67	18107	0.462798	0.92626
GO:0003777	microtubule motor activity	molecular_function	10	BBS4;CENPE;DNAH10;DNAH11;DNAH1;DNAH2;DNAH5;DNAH6;DNAH8;DNHD1;DYNC1H1;DYNC1I1;DYNC1I2;DYNC1LI1;DYNC1LI2;DYNC2H1;KIF12;KIF13A;KIF13B;KIF14;KIF15;KIF16B;KIF1A;KIF1B;KIF1C;KIF20A;KIF20B;KIF21A;KIF21B;KIF22;KIF23;KIF24;KIF27;KIF2A;KIF2C;KIF3A;KIF3B;KIF3C;KIF7;KIF9;KIFC1;KIFC2;KIFC3;KLC1;KLC2;KLC3;KLC4;LOC100855783;LOC102151505;LOC111095863;STARD9	51	13536	68	18107	0.546215	0.92626
GO:0007409	axonogenesis	biological_process	8	AFG3L2;ATP8A2;BRSK1;BRSK2;CCKAR;CDK5;CNP;CREB1;CTNNA2;DCLK1;ECM2;FLOT1;FMOD;GSK3B;KERA;LINGO1;LOC102152214;LOC106559890;LOC111097621;LOC491284;LRFN1;LRFN3;LRFN4;LRRN2;LRRN3;LUM;NOTCH1;NUMBL;NUMB;OGN;PAK3;PARD3;PLPPR4;PRELP;PTPN11;PTPRZ1;RAB3A;RTN4;RYK;SEMA4A;SHTN1;SLITRK1;SLITRK2;SLITRK4;SLITRK6;SMN;SPAST;STK11;STMN1;TOP2B;TWF2;TLR9	51	13536	73	18107	0.863433	0.995558
GO:0022625	cytosolic large ribosomal subunit	cellular_component	11	DHRS1;LOC102157274;LOC100682542;LOC100685611;LOC100687285;LOC100856673;LOC100856765;LOC106557826;LOC106558887;LOC106559787;LOC608703;MRPL1;MRTO4;NHP2;RPL10A;RPL10;RPL11;RPL13;RPL14;RPL15;RPL18A;RPL18;RPL21;RPL22L1;RPL22;RPL23A;RPL24;RPL26;RPL27A;RPL27;RPL28;RPL29;RPL30;RPL31;RPL32;RPL34;RPL36;RPL37;RPL39;RPL4;RPL5;RPL6;RPL7L1;RPL7;RPL8;RPL9;RPLP0;RPLP2;RSL1D1;RSL24D1;SNU13;ZNF622	51	13536	91	18107	0.999969	1
GO:0032755	positive regulation of interleukin-6 production	biological_process	8	ADORA2B;AKIRIN2;ARHGEF2;CD36;CYBA;DDX58;FAM227A;FCER1G;IL6R;IL6;ISL1;LBP;LOC100855825;LOC102151615;LOC102151812;LOC102153553;LOC102154270;LOC102154664;LOC102155568;LOC102156502;LOC102156665;LOC102157331;LOC106558034;LOC106558374;LOC106558823;LOC106559437;LOC111090201;LOC111090312;LOC111091236;LOC111092180;LOC111092398;LOC111093339;LOC111096242;LOC111097161;LOC111097271;MAPK13;MYD88;NOD1;NOD2;P2RX…	51	13536	140	18107	1	1
GO:0055037	recycling endosome	cellular_component	10	ABCG1;ACKR3;AP1G1;ARFGEF2;ATG9A;ATP11A;ATP11C;AVL9;CFTR;COMMD1;DENND6A;DYNC1I1;FAM109A;FAM109B;FCHSD1;FCHSD2;GPER1;GRIA1;GRIP1;HFE;LDLRAP1;LOC102151745;LOC106557476;PLXNB2;DENND6B;PPFIBP1;REP15;RAB10;RAB11A;RAB11B;RAB11FIP5;RAB13;RAN;SDCCAG3;SGK3;SH3TC2;SLC11A2;SLC31A1;SLC9A9;SNF8;SRPRB;ST8SIA2;STX7;TBC1D12;TBC1D14;TFRC;VAMP3;VAMP8;VIPAS39;VPS16;VPS52;WASHC1	50	13536	54	18107	0.000778099	0.0935814
GO:0005815	microtubule organizing center	cellular_component	11	AJUBA;AK5;ARFGEF2;BIRC6;C2CD5;C6H7orf43;CASP8;CDC42;CENPU;CEP152;CHMP1A;CIR1;CLASP2;DAB1;DDHD2;ERCC6L2;FAM110A;FLII;FNIP2;HOOK3;IFT43;KEAP1;KIF5B;KLHL12;LAS1L;LATS2;LOC100683419;LOC482687;LOC611922;LOC611915;LRIF1;PLA2G6;PPP4C;PPP4R3A;PRKCZ;RAB11B;RAB11FIP5;RAD51;RBM39;RPP25;RPS7;SAC3D1;SPAG9;SPDL1;TCTEX1D4;TLN1;TTC23L;TUBGCP2;UPF3B;YIF1A;ZNF365	50	13536	55	18107	0.00232122	0.180593
GO:0051897	positive regulation of protein kinase B signaling	biological_process	10	ANGPT1;BAG4;C1QBP;C1QTNF1;CHI3L1;CPNE1;RBM12;EGFR;ERBB4;EREG;F3;FAM110C;FGF2;GAS6;GATA3;HAX1;HBEGF;HCLS1;HPSE;IGF2;IGFBP5;INSR;ITGB1BP1;LEP;LOC488215;MTDH;MYDGF;MYOC;MYORG;NOX4;NRG1;OSBPL8;PDGFA;PIK3CG;PTK2;PTPN11;PTPRJ;RHOA;GPX1;RICTOR;SPRY2;SRC;STK3;STOX1;TCF7L2;TEK;TGFB1;THBS1;TNFAIP8L3;TNFSF11;TSPYL5;VEGFB	50	13536	61	18107	0.12279	0.92626
GO:0007219	Notch signaling pathway	biological_process	8	ADAM10;ANGPT4;ANXA4;BMP2;CDK6;CDKN1B;CEBPA;DTX1;DTX2;EP300;EPN1;FOXC2;GMDS;GOT1;GRIP2;HEY1;HHEX;HNF1B;HOXD3;IFT172;IFT74;JAG2;KCNA5;KRT19;LOC479376;LOC479668;MIB1;NLE1;NOTCH2;NOTCH3;NOTCH4;NR0B2;NR1H4;NRARP;ONECUT1;PERP;PLN;POFUT1;PSEN1;PSEN2;PTP4A3;RIPPLY1;RITA1;S1PR3;SNAI2;SOX9;TGFBR2;TMEM100;WDR12;ZNF423	50	13536	61	18107	0.12279	0.92626
GO:0006469	negative regulation of protein kinase activity	biological_process	11	AKT1S1;AKT1;ASPN;CHAD;CHP1;DBNDD2;SYS1;DCN;DNAJA3;DVL1;EPHA1;FGFR1OP;FLRT2;FLRT3;GADD45A;GADD45B;GMFG;GNAQ;INPP5K;ITGB1BP1;LRRC15;LRRC19;LRRC4B;LRRC4;LRRTM4;MLLT1;NF1;NF2;PARK7;PDPK1;PKN1;PODNL1;PODN;LOC106558831;PPM1F;PPP1R1B;PPP1R1C;PRKRIP1;RTN4RL1;SHB;SMYD3;SOCS2;SOCS4;SOCS5;SOCS6;SOCS7;TAF7;THY1;TRIB2;TRIM27;UBASH3B;WWTR1	50	13536	64	18107	0.323347	0.92626
GO:0005085	guanyl-nucleotide exchange factor activity	molecular_function	3	ANKRD27;ARHGEF7;BCAR3;DIS3;DOCK10;DOCK1;DOCK3;DOCK4;DOCK5;DOCK6;DOCK7;DOCK8;DOCK9;EIF2B1;EIF2B2;EIF2B3;EIF2B4;EIF2B5;ELMO1;FLCN;FNIP1;LAMTOR1;LAMTOR2;LAMTOR3;LAMTOR4;LOC102151654;LOC102152761;LOC102155399;LOC102155650;LOC102156319;LOC106558875;LOC106559864;LOC111094239;PLCE1;RAB3IL1;RABIF;RALGDS;RALGPS1;RALGPS2;RAPGEF5;RAPGEF6;RAPGEFL1;RASGRP1;RASGRP2;RIC8A;RIC8B;SH2D3A;SH2D3C;TBC1D10A;VAV2	50	13536	67	18107	0.574383	0.92626
GO:0050790	regulation of catalytic activity	biological_process	5	ARHGDIA;ARHGDIB;ARHGDIG;AUP1;BAG3;BMP2K;BRCC3;CAPN3;CBX8;CDC20;CHM;CTSB;DMPK;DPM2;FXYD3;FZR1;GDI1;GOPC;GPSM1;GPSM2;GPSM3;GRPEL1;GRPEL2;HIF1A;HSP90AA1;LOC477430;MAT2B;MTMR12;MTMR9;PCP2;PPP1R12A;PPP1R12B;PPP1R16A;PPP1R16B;PPP1R3C;PPP1R7;PPP1R8;PPP2R5C;PPP4R1;PPP4R2;PSMD2;PSMD3;RCAN1;RCAN2;RCAN3;RING1;SEPT2;SOD2;WBP11	49	13536	54	18107	0.00284364	0.213378
GO:0043130	ubiquitin binding	molecular_function	6	AUP1;BCL10;BRAP;BUB3;C12H6orf106;CRY1;MTERF2;CXCR4;DNAJC2;DYRK2;FAF1;FAF2;FAN1;IDE;KIF18A;LOC487429;MVB12A;NEDD4;NPLOC4;NSFL1C;NUP62;IL4I1;OTUB1;OTUB2;PRKN;RAE1;RBCK1;SIRT2;SMAD3;SQSTM1;TOLLIP;TOP2A;TP53INP2;TRIM32;TSG101;UBAP1;UBE2N;UBR5;UBTD1;UBTD2;UBXN11;UBXN2A;UBXN2B;UBXN7;UCHL1;UCHL3;USP13;USP16;USP5;VPS36;WDR92	49	13536	55	18107	0.00711007	0.373667
GO:0000785	chromatin	cellular_component	11	ANKRD17;ARRB1;BAHCC1;BAHD1;CAPN2;CCND2;CDK4;CHEK1;COPS5;DSCC1;EP300;ESCO1;FAM111A;FBXO18;HLCS;HMGN2;HMGN3;HTRA2;KIF22;LOC480926;MAU2;MBD4;MEN1;MTBP;NEDD4;NFE2L2;OIP5;PARK7;PARPBP;PDS5A;PDS5B;PLK1;PLK2;POLA1;RAD21;RAD51;RAN;RPA2;SLF2;SMC3;STAG2;TMPO;TNRC18;TOX4;TP73;UBR2;UPF1;WAPL;WDR82	49	13536	55	18107	0.00711007	0.373667
GO:0007224	smoothened signaling pathway	biological_process	8	ARL13B;ARL3;B9D1;BMP4;BOC;C31H21orf2;CC2D2A;CCNA2;BBS7;CDON;DISP1;DYRK2;DZIP1;EVC2;EVC;FKBP8;FOXF1;GLI3;HHAT;HIPK1;HIPK2;HSPB11;IFT172;IFT20;IFT27;IFT52;IFT57;IFT80;IQUB;KIAA0586;KIF3A;MAP3K10;NDST1;NKX2-2;NKX6-1;NSDHL;PTCHD1;PTPDC1;ROR2;SEPT2;SMO;TCTN2;TCTN3;TGFBR2;TMEM17;TMEM231;TROVE2;TTC21B;TTC26;WDPCP	49	13536	57	18107	0.0305904	0.820188
GO:0005741	mitochondrial outer membrane	cellular_component	13	AIFM2;ATF2;BAD;BAK1;BAX;BCL2A1;BCL2L1;BCL2L2;BCL2;BNIP3L;BNIP3;CISD2;CYB5B;DAO;DNM1L;HAX1;HK2;LOC102152873;LOC102154780;LPIN1;MAOA;MAOB;MARCH5;MAVS;MFF;MFN1;MFN2;MIEF2;MSTO1;MTX1;MTX2;MYOC;OPA1;PHB2;PPP1CC;RAB11FIP5;RMDN3;RSAD2;SH3GLB1;SLC25A46;SLC8A3;SNN;SPART;CCDC169;TIGAR;TMEM173;TOMM34;VDAC1;VDAC2;VDAC3	49	13536	58	18107	0.0546115	0.92626
GO:0045444	fat cell differentiation	biological_process	7	ALMS1;ALOXE3;ARL6;ATF2;ATF5;BBS1;BBS2;BBS4;BBS9;CBY1;CCNA2;BBS7;CCND1;CLIP3;CREB5;EP300;FBXO9;FFAR2;GRK5;GSK3B;INHBB;KLF4;LOC111091360;LRRC8C;MED1;METTL8;MKKS;LOC102153017;NOC3L;NR4A1;NR4A2;NR4A3;OSBPL11;OSBPL8;PIAS1;PID1;PRLH;PSMB8;RHOA;GPX1;RNASEL;SDF4;SENP2;SMAD6;SOCS7;SREBF1;STEAP4;TCF7L2;TFAP2B;TMEM120A;STYXL1;TRIM32;TTC8	49	13536	59	18107	0.0898261	0.92626
GO:0005125	cytokine activity	molecular_function	6	AIMP1;BMP1;BMP2;BMP3;BMP4;BMP6;C37H2orf88;CCL27;LOC111098084;CD40LG;CLCF1;CMTM7;CRLF1;CSF1;EDN1;FLT3LG;GDF11;GDF15;GDF6;GDF9;GREM1;GREM2;HMGB1;IL11;IL15;IL16;IL17D;IL18;IL1A;IL1RN;IL23A;IL33;IL6;INHBA;INHBB;KITLG;LIF;LOC100855618;LOC607768;NDP;SCG2;TGFB2;TGFB3;TIMP1;TNFSF10;TNFSF11;TNFSF13;TNFSF15;WNT2;ZFP91;CNTF	49	13536	94	18107	0.999999	1
GO:0000724	double-strand break repair via homologous recombination	biological_process	11	AP5S1;AP5Z1;BLM;BRCA1;BRCA2;ERCC4;FAN1;GEN1;HAUS3;POLN;HELQ;HUS1;INO80;LOC477937;LOC489372;MCM8;MEIOB;MMS22L;NABP1;NABP2;SLC39A5;NBN;NSMCE1;NSMCE2;PALB2;PSMD14;RAD50;RAD51B;RAD51;RAD54B;RAD54L;RBBP8;REC8;RECQL5;RECQL;RPA1;RPA2;RPA3;SEM1;SFR1;SLX4;SMC5;SMC6;SPIDR;SWSAP1;TONSL;UBE2N;WDR48;ZFYVE26;ZSWIM7	48	13536	51	18107	0.000342335	0.0528633
GO:0003684	damaged DNA binding	molecular_function	7	APTX;CUL4B;DCLRE1A;DCLRE1B;DCLRE1C;DDB1;DDB2;ENDOD1;LOC485120;EP300;ERCC1;ERCC4;GTF2H3;HMGB1;HMGB2;LOC102151348;LOC476820;LOC477937;LOC489372;MGMT;MSH2;MSH3;MSH5;MSH6;NBN;NEIL1;NEIL2;NEIL3;PCNA;POLD1;POLH;POLI;POLK;RAD1;RAD23A;RAD23B;RBBP8;REV1;RPA1;RPA2;RPA3;RPS3;TP73;UNG;XPA;XPC;XRCC1;XRCC5;XRCC6	48	13536	52	18107	0.00120603	0.12421
GO:0030176	integral component of endoplasmic reticulum membrane	cellular_component	13	ABCB9;ACER3;AMFR;NUDT21;ANKLE2;ASPH;ATF6;AUP1;BSCL2;CREB3;DERL1;DERL2;DERL3;DGAT2;DHCR7;DHRS9;DOLK;DOLPP1;DPM2;DPM3;EDEM1;ELOVL4;ELOVL6;ERN1;ESYT1;FITM2;FKBP8;G6PC2;G6PC3;HSPA5;LBR;LOC111097621;MARCH6;PIGG;PORCN;RCE1;RETREG1;RRBP1;RTN4;SAMD8;SARAF;SELENOS;SLC35B1;SLC35B3;SLC35B4;STIM1;TECR;TM7SF2;WFS1	48	13536	54	18107	0.00855404	0.424579
GO:0001843	neural tube closure	biological_process	12	ALX1;ARID1A;BBS4;BCL10;BMP4;CC2D2A;CITED2;COBL;ENAH;FUZ;FZD3;FZD6;GLMN;GRHL2;IFT122;IFT172;IFT57;KAT2A;KDM6A;KIF20B;LIAS;LMO4;LRP6;MED12;MKS1;MTHFD1L;MTHFD1;PFN1;PLXNB2;DENND6B;PRKACA;PTCH1;RALA;RARA;RARG;RGMA;SCRIB;SDC4;SEMA4C;SETD2;SHROOM3;SPINT1;SPINT2;ST14;SUFU;TRAF6;TSC1;TULP3;ZEB2	48	13536	57	18107	0.0627361	0.92626
GO:0008289	lipid binding	molecular_function	4	ACBD5;ACOT11;AMER2;AP2M1;APOL5;APOL6;APOLD1;BAX;CADPS;CD36;CD55;COQ9;CYTH1;DBI;DLC1;EPN2;ESYT3;FABP5;FER;FNBP1L;GOLPH3;LOC102156332;LOC111097364;MARK2;MVB12A;MVB12B;NR6A1;PACSIN3;LOC111090846;PEBP1;MIR8819;PEX3;PITPNA;PITPNB;PLIN4;PLTP;PPARA;PPARD;RBP1;SH3GL1;SH3GLB1;STARD10;STARD13;STARD4;STARD6;STARD7;STARD8;STARD9;UNC119B;UNC119	48	13536	66	18107	0.70488	0.92626
GO:0004867	serine-type endopeptidase inhibitor activity	molecular_function	7	AGT;AMBP;APLP2;APP;COL28A1;COL6A3;COL7A1;CRIM1;FURIN;ITIH1;ITIH2;ITIH4;ITIH5;LOC106558737;LOC111092171;LOC477699;LOC490840;LOC491368;LOC607114;LOC607205;PAPLN;PCSK1N;PEBP1;MIR8819;SERPINA1;LOC111097149;SERPINB1;SERPINB2;SERPINB5;SERPINB6;SERPINB9;SERPINE1;SERPINE2;SERPINF1;SERPING1;SERPINH1;SERPINI1;SERPINI2;SLPI;SPINK1;SPINK2;SPINK5;SPINK8;SPINT1;SPINT2;TFPI2;TFPI;WFDC2;WFDC3;WFIKKN2	48	13536	74	18107	0.979176	1
GO:0032436	positive regulation of proteasomal ubiquitin-dependent protein catabolic process	biological_process	12	AKT1;ANKIB1;ARIH1;ARIH2;AURKA;CBFA2T3;CCNA2;BBS7;CHFR;ZNF605;CLU;CSNK1D;CSNK1E;DAB2;DET1;DVL1;FBXO22;GCLC;GSK3B;HSPBP1;LRRK2;NKD2;PIAS1;PLK1;PRKN;PSEN1;PSMD10;RACK1;RCHY1;RFWD2;RNF114;RNF125;RNF138;RNF144A;RNF144B;RNF14;RNF166;RNF19A;RNF19B;RNF217;SMAD7;SOCS4;SOCS5;STUB1;SUMO1;TRIB2;TRIB3;USP5;VCP	47	13536	50	18107	0.000433011	0.063226
GO:0019903	protein phosphatase binding	molecular_function	7	ANAPC4;ANAPC5;ANAPC7;AP3B1;BAD;CDC27;CDH2;CDH5;CDKN1B;CSF1R;CTNNB1;DLG2;DLG4;EGFR;EIF2AK3;ERBB2;FBXL2;GRB2;HSF4;HSP90B1;IQGAP1;ITGA1;JAK1;JAK3;KCNN4;LOC490969;MAP3K5;MAPK14;MET;MVP;NEK2;PARD3;PIK3R1;PPME1;PPP1R3C;PPP6R1;PPP6R3;RACK1;ROS1;RPA2;SNX3;STAT3;STAT6;STX17;TRAF3;VCP;VRK3	47	13536	52	18107	0.00424723	0.271042
GO:0006888	ER to Golgi vesicle-mediated transport	biological_process	7	ANK1;BCAP31;CD55;CNIH4;COPB2;COPE;CREB3L2;DYNC1I1;DYNC1I2;ERGIC1;GOSR1;GOSR2;LMAN1;LOC100686682;LOC102151415;MPPE1;NRBP1;NRBP2;RAB1B;RAB35;RANGRF;SEC22A;SEC22B;SEC22C;SEC23A;SEC23B;SEC24A;SEC24B;SEC24C;SEC24D;SPAST;STX17;STX18;STX5;TMED7;TRAPPC1;TRAPPC2L;TRAPPC2;TRAPPC3L;TRAPPC3;TRAPPC4;TRAPPC8;USO1;VTI1A;VTI1B;WHAMM;ZW10	47	13536	53	18107	0.0102718	0.483008
GO:0000151	ubiquitin ligase complex	cellular_component	7	ANKIB1;ARIH1;ARIH2;BRAP;BRCC3;CDK8;DCUN1D1;DCUN1D2;DCUN1D3;DCUN1D4;DCUN1D5;DNAJA1;DYRK2;FBXL12;FBXO11;FBXO21;FBXO7;FBXO8;IKBKG;LOC102155956;MED20;MIB2;NEDD4;PRKN;RCHY1;RNF11;RNF144A;RNF144B;RNF14;RNF168;RNF19A;RNF19B;RNF217;RNF8;SMURF2;STUB1;TRAF7;UBE2D1;UBE2D2;UBE2E1;UBE2J2;UBE2N;UBE2V1;UBE4A;UBE4B;UBR2;UBR3	47	13536	54	18107	0.0218057	0.727739
GO:0031234	extrinsic component of cytoplasmic side of plasma membrane	cellular_component	7	ABL1;ABL2;ALOX15;BMX;BTK;CAV2;CDK16;UBA1;CSK;CYLD;CYTH1;CYTH3;DLG4;DTNA;ERRFI1;ESYT2;ESYT3;FERMT2;FER;FES;FGR;FRK;FYN;GPHN;HCK;IQGAP1;ITK;JAK1;JAK2;JAK3;KCNAB1;KCNAB2;KCNIP1;KRAS;LYN;PTK2B;PTK2;S100A6;SNX18;SNX5;SNX9;SRC;SYK;TEC;TNK1;TNK2;TYK2;ZAP70	47	13536	56	18107	0.0718912	0.92626
GO:0004702	signal transducer, downstream of receptor, with serine/threonine kinase activity	molecular_function	9	ACVR1B;ACVR1;ACVR2A;ACVR2B;ACVRL1;BMPR1A;BMPR2;LOC102156729;MAP2K1;MAP2K2;MAP2K3;MAP2K4;MAP2K5;MAP2K6;MAP3K14;MAP3K1;MAP3K2;MAP3K3;MAP3K4;MAP3K8;MAP4K1;MAP4K2;MAP4K3;CDKL4;MAP4K4;MAP4K5;MINK1;LOC111096071;NEK4;OXSR1;PAK1;PAK2;PAK3;PAK4;SLK;STK10;STK24;STK25;STK26;STK39;STK3;STK4;STRADB;TAOK1;TAOK2;TMEM219;TAOK3;TGFB2;TGFBR2;TNIK	47	13536	56	18107	0.0718912	0.92626
GO:0007160	cell-matrix adhesion	biological_process	6	ADAMTS12;ANGPTL3;BCL2L11;CD63;CDK5;COL13A1;COL3A1;COL5A3;CTGF;CTNNB1;EMP2;EPDR1;FREM1;HOXD3;HPSE;ITGA10;ITGA11;ITGA1;ITGA2;ITGA6;ITGA8;ITGAV;ITGB1BP1;ITGB1;ITGB2;ITGB3;ITGB4;ITGB6;ITGB8;JAM3;LOC102153796;LOC111094296;LOC611363;MKLN1;NID1;NID2;NPNT;PPFIA2;PXN;SNED1;SRF;TMEM8B;TNXB;TSC1;VCAM1;VCL;ZYX	47	13536	60	18107	0.318935	0.92626
GO:0005777	peroxisome	cellular_component	10	ABCD2;ABCD3;ABCD4;ACADM;ACBD5;ACOT4;ACOX1;ACOX2;ACOX3;AKAP11;ALDH3A2;AMACR;ATAD1;CAT;CRAT;DCAF8;DHRS4;DNM1L;EHHADH;EPHX2;FAR1;FAR2;HMGCL;HSDL2;IDH1;IDH2;IDI1;KCNN3;PMVK;LACC1;LOC608697;MARF1;MFF;MUL1;NOS2;NUDT7;PECR;PIPOX;RIDA;SCP2;SOD1;SYT7;SZT2;TMEM135;TMEM173;TYSND1;VIM;ZADH2	47	13536	60	18107	0.318935	0.92626
GO:0007169	transmembrane receptor protein tyrosine kinase signaling pathway	biological_process	9	ABL1;ABL2;ANGPTL1;BLNK;BMX;BTK;CSF1R;CSF1;CSK;DOK1;DOK4;ERBB2;ERBB4;FGR;FLT3;FRK;FYN;GAB2;GFRA2;HCK;INSRR;INSR;ITK;JAK1;JAK2;JAK3;LCP2;LYN;MET;MST1R;NPTN;LOC111093395;NTF3;NTRK3;PAG1;PGM1;ROR1;RET;ROR2;ROS1;SH2D6;SHC4;STAP1;SYK;TEC;TNK1;TNK2;TYK2;ZAP70	47	13536	63	18107	0.577758	0.92626
GO:0034765	regulation of ion transmembrane transport	biological_process	7	ASIC2;CACNA1A;CACNA1B;CACNA1C;CACNA1D;CACNA1G;CACNA1H;CACNA2D2;CATSPER3;CLIC1;CLIC4;CLIC5;CLIC6;KCNA1;KCNA3;KCNA6;KCNB1;KCNC4;KCND1;KCNF1;KCNG1;KCNG3;KCNH2;KCNIP1;KCNJ11;KCNJ12;KCNJ16;KCNJ3;KCNJ4;KCNJ5;KCNJ8;KCNJ9;KCNQ3;KCNS3;LOC102156059;LOC111093450;LOC478773;NALCN;SCN3A;SCN5A;SCN7A;SCN8A;SCN9A;TMEM37;TPC3;TPCN1;TPCN2	47	13536	72	18107	0.973679	1
GO:0042147	retrograde transport, endosome to Golgi	biological_process	7	ANKFY1;ARFRP1;ARL1;BET1L;CLTCL1;DCTN1;DENND2A;ERC1;EVI5;FAM109A;FAM109B;GOSR1;GOSR2;HEATR5A;LOC102151745;MAGEL2;PIKFYVE;RAB6A;RAB6B;RAB7A;RAB9A;TCEANC;RFLNB;VPS53;RGP1;RIC1;RNF126;SNX2;SNX5;SPAG9;STX10;STX16;STX6;TBC1D10A;TBC1D10B;TBC1D17;TBC1D5;TRIM27;UBE2O;VAMP3;VPS26A;VPS26B;VPS29;VPS35;VPS51;VPS54;VTI1A;VTI1B	46	13536	48	18107	0.000123695	0.0241746
GO:0010008	endosome membrane	cellular_component	11	ANKFY1;ANTXR1;AP3D1;APPL1;APPL2;CDK16;UBA1;CHMP1B;CLEC16A;DIO3;EHD1;ERBB2;FIG4;KIF13A;LEPROT;LOC100855460;MRC1;MYO1B;OCA2;PPFIBP1;REP15;RAB15;RAB22A;RAB23;RAB35;RET;RFFL;RHOB;RILP;SLC11A1;SNX17;SNX1;SNX2;SNX3;SPPL2B;TBC1D5;TMBIM1;TMEM165;TPCN1;TPCN2;UBAP1;UBE2D3;VAC14;VPS29;VPS45;VPS4B;VPS52;WIPI1	46	13536	50	18107	0.00185915	0.158456
GO:0031201	SNARE complex	cellular_component	9	BLOC1S6;BNIP1;CPLX1;GOSR1;GOSR2;LOC480074;VAMP4;LOC608858;NAPA;NAPB;NAPG;SCAMP5;SEC22A;SEC22B;SEC22C;SNAP23;SNAP25;SNAP29;SNAP47;SNX4;STX10;STX11;STX16;STX17;STX18;STX19;STX1A;STX1B;STX2;STX3;STX4;STX5;STX6;STX7;STX8;STXBP2;STXBP5L;STXBP5;TSNARE1;VAMP1;VAMP2;VAMP3;VAMP5;VAMP7;VAMP8;VTI1A;VTI1B	46	13536	50	18107	0.00185915	0.158456
GO:0016579	protein deubiquitination	biological_process	10	BAP1;BRCC3;COPS5;DMWD;EIF3F;EP300;JOSD1;JOSD2;PRKN;SMAD7;STAMBP;SUDS3;TNKS2;UCHL1;UCHL3;UCHL5;USP10;USP11;USP12;USP14;USP15;USP18;USP21;USP24;USP25;USP28;USP2;USP30;USP31;USP32;USP35;USP36;USP38;USP39;USP42;USP43;USP45;USP46;USP48;USP4;USP53;USP54;USP7;USP9X;WDR20;WDR48	46	13536	50	18107	0.00185915	0.158456
GO:0007179	transforming growth factor beta receptor signaling pathway	biological_process	10	ACVR1;ACVRL1;CDH5;CITED2;COL1A2;COL3A1;DUSP22;FERMT2;FOS;FUT8;HIPK2;HPGD;JUN;LOC102152029;LOC111094296;LOC488215;MTMR4;NLK;PARD3;PDGFB;PML;PTK2;PTPRK;PXN;SKIL;SMAD1;SMAD2;SMAD3;SMAD4;SMAD5;SMAD6;SMAD7;SMAD9;SMURF1;SRC;TGFB1;TGFB2;TGFB3;TGFBR1;TGFBR2;TGFBR3;USP15;USP9X;WFIKKN2;ZFYVE9;ZYX	46	13536	51	18107	0.00517761	0.309496
GO:0005871	kinesin complex	cellular_component	12	CENPE;KIF11;KIF12;KIF13A;KIF13B;KIF14;KIF15;KIF16B;KIF18A;KIF18B;KIF1A;KIF1B;KIF1C;KIF20A;KIF20B;KIF21A;KIF21B;KIF22;KIF23;KIF24;KIF26A;KIF26B;KIF27;KIF2A;KIF2C;KIF3A;KIF3B;KIF3C;KIF4A;KIF5A;KIF5B;KIF5C;KIF7;KIF9;KIFC1;KIFC2;KIFC3;KLC1;KLC2;KLC3;KLC4;LOC100855783;LOC102151505;NDE1;NDEL1;STARD9	46	13536	53	18107	0.0257079	0.792006
GO:0000932	P-body	cellular_component	10	AGO2;AGO3;AJUBA;BTBD1;BTBD2;BTBD6;CAPRIN1;CNOT1;CNOT2;CNOT3;CNOT7;CNOT9;DCP1A;DCP1B;DCP2;DDX6;DIS3L2;EDC3;EDC4;EIF4ENIF1;LIMD1;LOC102152203;LOC475337;LOC482480;LSM14A;LSM1;LSM2;LSM3;LSM4;LSM6;MOV10;NOCT;PAN2;PAN3;PATL1;POLR2D;POLR2G;PSMA2;PSMA6;PUM1;RC3H1;SQSTM1;TNRC6A;TOP1;WTIP;YTHDF2	46	13536	53	18107	0.0257079	0.792006
GO:0019900	kinase binding	molecular_function	6	ARHGEF39;SIT1;ATF5;CAB39;CDC6;CEBPA;CHP1;DAB2IP;DGKQ;DLG2;DLG3;DLG4;HSP90AB1;IGSF9B;JAKMIP2;LOC102156762;LOC102156972;MIDN;MOB1B;PARK7;PARP16;PER1;PER3;PFKL;PFKM;PIP5K1A;PPP2R5A;PRKN;PTPN22;RAB3IL1;RASGRP3;SNAI1;SRC;STRADA;STUB1;STX1A;TAX1BP1;TNFAIP3;TNS2;TOLLIP;TRADD;TRIP6;UBQLN1;WDCP;WWC1;WWC2;WWC3	46	13536	54	18107	0.0481455	0.92626
GO:0002039	p53 binding	molecular_function	5	AK6;TAF9;ANKRD1;BANP;BCL2L12;BRD4;BRD7;CDK5;CDKN2AIP;CHD8;DAXX;DUSP26;EHMT1;EP300;GSK3B;HTT;KDM1A;LOC610615;MAPKAPK5;MSX1;PLK3;PPP1R13B;PSME3;RCHY1;RFFL;RNF20;RNF34;SETD7;SIRT1;SMARCA4;SMARCB1;SMYD2;STK11;TAF3;TP53BP1;TP53BP2;TP53RK;TP73;USP10;USP7;ZMAT1;ZMAT3;ZMAT4;ZNF346;ZNF385A;ZNF385B;ZNF385D	46	13536	55	18107	0.0821729	0.92626
GO:0090263	positive regulation of canonical Wnt signaling pathway	biological_process	11	AMER1;ARNTL;ASPM;BAMBI;CAPRIN2;CAV1;CCAR2;COL1A1;CSNK1D;CSNK1E;CTDNEP1;DAPK3;DKK2;DVL1;DVL2;FGF2;GPRC5B;ILK;LGR4;LGR5;LRP6;LRRK2;NFKB1;NLE1;NRARP;PPP2R3A;RNF146;RNF220;ROR2;RSPO3;SFRP1;SFRP4;SMAD3;SOX4;SRC;SULF2;TNKS2;TNKS;TRPM4;USP34;VPS35;WLS;WNT2;WNT4;XIAP;YAP1	46	13536	57	18107	0.190307	0.92626
GO:0006486	protein glycosylation	biological_process	8	ALG1;B3GALNT1;B3GALT1;B3GALT2;B3GALT4;B3GALT6;B3GNT2;B3GNT3;B3GNT5;B3GNT7;B3GNT9;COG7;DAD1;DHDDS;EXTL1;FUT10;FUT11;FUT1;FUT2;FUT4;FUT5;LOC111091392;GALNT12;GALNT13;GALNT15;GALNT16;GALNT17;GALNT18;GALNT5;GALNT6;GALNT7;GALNT9;LOC100683739;LOC102152620;LOC488215;MGAT1;NPC1;OAS2;PSEN1;SERP2;ST6GALNAC2;ST8SIA1;ST8SIA2;ST8SIA5;PIAS2;TMEM115;UGGT1;UGGT2	46	13536	58	18107	0.263312	0.92626
GO:0007626	locomotory behavior	biological_process	4	ADCY5;ADORA2A;ALDH1A3;ALS2;APBA2;ASL;ASTN1;CACNA1B;CALB1;CELSR1;CHRNA4;CHRNB2;CHRNB4;DSCAM;ELAVL4;ETV5;FIG4;GAA;GMFB;GNAO1;GPR88;GPRC5B;HEXB;HPRT1;MCOLN3;MECP2;MEIS1;NAV2;NEGR1;NPY1R;NPY2R;NRG1;OLFM2;PDE1B;PEX13;RASD2;SELENOP;SLC18A2;SNAP25;SOBP;SOD1;SOD2;TAL1;UBA6;ZDHHC8;ZNF385A	46	13536	64	18107	0.754317	0.929831
GO:0030426	growth cone	cellular_component	6	APBB1;ARHGEF7;CCDC120;CDK5;CIB1;CRTAC1;CXADR;DCLK1;DCTN2;DPYSL2;DPYSL3;DSCAM;DTNBP1;DVL1;ELAVL4;ERC2;FBRSL1;FGF13;FKBP15;FSCN1;GSK3B;INPP5J;IQGAP1;KLC1;LRRC45;RAC3;LRRK2;MAP3K12;MAPT;MARCKS;MYH10;MYH14;NRSN1;PCDH9;PSEN1;RUFY3;SETX;SHANK2;SHTN1;SNCA;STMN2;TENM2;TPM3;TWF2;TLR9;USP9X;ZPR1	45	13536	48	18107	0.000690466	0.0855084
GO:0001726	ruffle	cellular_component	6	ACTN1;ALS2;AMOT;ARAP3;ARF6;ASAP3;ATP6V1B2;BCAR1;CD2AP;CDK6;COBL;CTTN;CUX1;SH2B2;CYTH3;EZR;FRMD4B;FSCN1;GAS7;INPP5J;INPP5K;IQGAP1;ITGB1BP1;KIF18A;LCP1;LOC491973;MKLN1;MTM1;MTMR14;MYH9;MYO6;NF2;PAK1;PLCG1;RAB22A;RAB5A;RASA1;RDX;ROCK1;S100A6;TLN1;TLN2;TNFRSF12A;TRPM7;VIL1;WASF2	45	13536	48	18107	0.000690466	0.0855084
GO:0030433	ubiquitin-dependent ERAD pathway	biological_process	11	AMFR;NUDT21;ANKZF1;AUP1;DERL2;DERL3;DNAJB9;DNAJC10;EDEM1;EDEM2;EDEM3;ERLEC1;ERLIN1;ERLIN2;FAF2;FBXO2;FBXO6;FOXRED2;HSP90B1;LOC100687259;LOC480667;OS9;PSMC1;PSMC2;PSMC3;PSMC4;PSMC5;RNF103;RNF185;SEC61B;SELENOS;STT3B;SYVN1;TMEM129;TMEM67;TMUB1;UBE2G2;UBE2J1;UBE2J2;UBQLN1;UBQLN2;UBXN4;UBXN8;USP19;WFS1;YOD1	45	13536	49	18107	0.00230331	0.180593
GO:0000980	RNA polymerase II distal enhancer sequence-specific DNA binding	molecular_function	11	ACTL6A;ARID3B;ATF2;BACH1;BACH2;CDX2;CHD4;CREB1;FLI1;GZF1;H2AFZ;HDAC2;HIVEP1;HOXB5;JUN;MBD3;MED12;MEF2C;MEOX2;MIXL1;MSC;MTA2;NFE2L1;NFE2L2;NFKB1;NFYA;NR1H4;NR2F6;NR5A2;PAX4;PBX3;RBBP4;RELA;REL;RUVBL2;SMARCA4;SMARCB1;SMARCC1;SMARCC2;SMARCD2;SMARCE1;SOX10;SPI1;TAL1;ZBTB16	45	13536	49	18107	0.00230331	0.180593
GO:0008021	synaptic vesicle	cellular_component	11	APBA1;APBA2;BRSK1;CDK16;UBA1;CLCN3;COPS5;CTTNBP2;DISC1;DLG4;DMXL2;GIPC1;GRIA1;LAMP1;LGI3;LRRK2;MFF;MME;NDEL1;PDE4B;PPT1;RAB11B;RAB3A;RAB3B;RAB3C;RAB8A;SEPT5;SEPT6;SLC40A1;SNAPIN;STON2;STX11;STX19;STX1A;STX1B;STX2;STX3;STX4;SV2B;SV2C;SYN3;SYNGR3;SYT7;TOR1A;TRAPPC4;VTI1A	45	13536	49	18107	0.00230331	0.180593
GO:0051117	ATPase binding	molecular_function	6	ABCA1;AK6;TAF9;ALDOB;ANK1;ATP1B1;ATP1B2;ATP1B3;ATP6V0A1;ATP6V0A2;ATPIF1;ATXN3;BRSK2;CAV1;DERL1;DNAJB1;DNAJC10;ESR1;EZR;FXYD3;HRC;LOC106557472;LOC610310;LOC612591;METTL21A;NOP58;NR1H2;PDE4D;PEX19;PEX26;PIH1D1;PKD2;PTPN3;RALA;RALB;RDX;RUVBL2;SELENOS;SNU13;SNX10;SVIP;SYVN1;TCIRG1;TOR1AIP1;UBXN1;WFS1;ZNHIT6	45	13536	51	18107	0.0147242	0.594097
GO:0006470	protein dephosphorylation	biological_process	8	AVIL;CTDSP2;BTRC;CTDNEP1;CTDSP1;CTDSPL2;CTTNBP2NL;DLG1;DUSP12;DUSP19;LOC106558298;DUSP22;DUSP8;FBXW11;ILKAP;NCEH1;PDP2;PDXP;PGAM5;PLPP1;PP2D1;PPA2;PPEF1;PPM1H;PPM1J;PPM1K;PPM1L;PPM1M;PPP1CA;PPP1CB;PPP1CC;PPP1R3E;PPP2CA;PPP2CB;PPP2R2A;PPP3CA;PPP3CB;PPP3CC;PPP4C;PPP4R3A;PPP4R3B;PPP5C;PPP6C;SDHAF2;TAB1;TMEM120A;STYXL1;UBLCP1	45	13536	51	18107	0.0147242	0.594097
GO:0071356	cellular response to tumor necrosis factor	biological_process	8	ADAMTS12;ADAMTS7;ANKRD1;BAG4;CACTIN;CCL17;CCL20;CCL23;CCL24;CCL25;CCL2;CCL5;CCL7;CCL8;CD58;CHI3L1;CHUK;CIB1;CX3CL1;CXCL8;DAB2IP;ERBIN;GATA3;GBA;GPD1;GPER1;HAS2;HYAL1;HYAL2;HYAL3;IFRD2;IL6;INPP5K;LOC480601;LOC480603;NFE2L2;NKX3-1;NPNT;PID1;RELA;RIPK1;RORA;SFRP1;SIRT1;ZNF268	45	13536	53	18107	0.0557345	0.92626
GO:0002244	hematopoietic progenitor cell differentiation	biological_process	7	ACP6;ADAR;AGPAT5;ANLN;ARHGEF7;ARMC6;BVES;C15H12orf29;CITED2;COL24A1;DHTKD1;EEF2;EML1;ESCO2;FSTL3;FST;GPATCH4;HERC6;HOXB3;HYAL2;INHBA;KCNAB2;KCP;MIXL1;PAPD4;PDGFRA;PLEK;PRRC2C;PSEN1;PTPRZ1;PYGO1;RBM47;RRS1;SAMD9L;SIPA1L3;SLC7A6OS;SLC8A3;SSBP3;STON2;TCAF2;TGFB1;TOP2A;WDR78;WDR7;ZBTB24	45	13536	55	18107	0.145458	0.92626
GO:0006906	vesicle fusion	biological_process	6	C2CD4A;C2CD5;CAV2;DOC2B;DYSF;EEA1;GOSR1;LOC480074;VAMP4;LOC608858;LOC611813;RPH3AL;STX10;STX16;STX17;STX5;STX6;STX7;STX8;SYT11;SYT12;SYT13;SYT14;SYT16;SYT1;SYT2;SYT3;SYT4;SYT5;SYT6;SYT7;SYT9;SYTL1;SYTL2;SYTL3;SYTL4;SYTL5;TC2N;TSNARE1;VAMP1;VAMP2;VAMP3;VAMP5;VAMP7;VAMP8;VAV3	45	13536	56	18107	0.21087	0.92626
GO:0001228	transcriptional activator activity, RNA polymerase II transcription regulatory region sequence-specific DNA binding	molecular_function	6	ALX1;ALX4;ARID3A;ATF1;BARX1;BHLHA15;CREB3L3;CSRNP1;CSRNP2;DLX2;E2F4;EAF2;EP300;ETV5;FOXF1;FOXO3;GATA2;GATA3;GATA4;GATA5;GATA6;GRHL2;HNF1A;HNF4A;HOXD8;HSF2;IKZF3;IRF2;MAATS1;NR1I2;MAFB;MAFF;MAFG;MAFK;MSX1;NRL;OSR2;OVOL2;PKNOX1;PLAGL1;RAD21;RFX6;RXRB;TBX5;TP53;TRPS1	45	13536	64	18107	0.833014	0.972031
GO:0001932	regulation of protein phosphorylation	biological_process	9	APOA1;CCDC88C;CELSR3;FAM227A;FER;FLCN;FNIP1;FNIP2;HUS1;ITPKB;LOC102151615;LOC102151812;LOC102152029;LOC102153553;LOC102154270;LOC102154664;LOC102155568;LOC102156502;LOC102156665;LOC102157331;LOC106558034;LOC106558374;LOC106558823;LOC106559437;LOC111090201;LOC111090312;LOC111091236;LOC111092180;LOC111092398;LOC111093339;LOC111096242;LOC111097161;LOC111097271;LOC111097376;NDUFS4;PLXNB2;DENND6B;PML;…	45	13536	130	18107	1	1
GO:0043401	steroid hormone mediated signaling pathway	biological_process	8	BMP4;BMP7;ESRRA;HNF4A;HNF4G;LEF1;MAATS1;NR1I2;NR0B2;NR1D1;NR1D2;NR1H2;NR1H3;NR1H4;NR2C1;NR2C2;NR2F1;NR2F2;NR2F6;NR3C2;NR4A1;NR4A2;NR4A3;NR5A2;NR6A1;PAQR5;PAQR6;PAQR7;PAQR8;PAQR9;PGR;PPARA;PPARD;PPARG;RARA;RARB;RARG;RORA;RORB;RORC;RXRA;RXRB;RXRG;THRB;VDR	44	13536	50	18107	0.0175742	0.654222
GO:0016363	nuclear matrix	cellular_component	11	AKAP8L;AKAP8;ALOX5;ANP32A;ATN1;CAD;ATRAID;CASK;CFL2;CHMP1A;CLIC4;DCAF7;DNMT3A;ERCC8;FIGN;GFI1;GHRHR;GMCL1;HLCS;HNRNPM;LMNB1;LOC102152029;MAEA;MEN1;NSMF;OGG1;PHB2;PHF5A;PIAS4;PML;POLA1;PRKCZ;PRPF40A;PSMA6;SATB1;SMC3;SNW1;SORBS1;SPARC;SPTBN4;TEP1;TP53;UHRF1;ZNF326;ZNF703	44	13536	50	18107	0.0175742	0.654222
GO:0000226	microtubule cytoskeleton organization	biological_process	6	ATXN7;BBS1;CAMSAP2;CCDC8;CLASP2;CNTN2;CUL7;CUL9;DISC1;DYNC1LI2;FER;GAPDH;GAS2L3;LOC106559694;RP9;LOC480074;VAMP4;MAP1A;MAP1S;MAP2;MAP6;MAP7D1;MAP7D2;MAP7D3;MAP7;MAPT;MARK2;MARK3;NEFL;OBSL1;PHLDB2;PPP2R3C;PRKCZ;PTK2;RANBP10;SS18;TACC1;TACC2;TACC3;TBCD;TBCE;TTL;TUBGCP2;ULK4;WEE1;ZPR1	44	13536	51	18107	0.0354889	0.910531
GO:0033138	positive regulation of peptidyl-serine phosphorylation	biological_process	10	AKT1;ANGPT1;ARRB1;ATP2B4;BAG4;BCAR3;BRAF;CAMK1;CAPRIN2;CAV1;CD44;CREBL2;FNIP1;FNIP2;GAS6;GCG;GSK3A;GSK3B;HAX1;HCLS1;IL11;IL6;LATS1;LOC102155886;MAD2L2;NTF3;NTRK2;PAK1;PARK7;PDCD10;PIK3CA;PPP1R15A;PRKD1;PRKD2;RAF1;RAPGEF3;RIPK2;SMYD3;SNCA;SPRY2;STK4;STOX1;TERF2IP;TGFB1	44	13536	52	18107	0.0643566	0.92626
GO:0001934	positive regulation of protein phosphorylation	biological_process	10	AKT2;AKTIP;ATG14;AXIN2;CDK2AP1;CLIP3;CLN3;CSNK1D;DVL1;EFNA5;EP300;EPHA7;ERBB4;FAM129A;FAM129C;FBXO18;FLCN;FLOT1;FLT3LG;FNIP1;FZD1;HDAC3;IL34;KRAS;LOC111091388;MAPK9;MAVS;MMP9;MOB2;NKX3-1;NPTN;LOC111093395;PIN1;PROM2;PRR5;RAC1;RACK1;RARRES2;RB1CC1;ROCK2;SOX9;SPN;TGFB1;WDFY2;ZNF268	44	13536	52	18107	0.0643566	0.92626
GO:0032088	negative regulation of NF-kappaB transcription factor activity	biological_process	14	ANXA4;ARRB1;CACTIN;CDK5RAP3;CDKN2A;CHP1;CMKLR1;COMMD1;COMMD6;COMMD7;CYLD;DAB2IP;DNAJA3;ERBIN;FOXJ1;IRAK1;IRAK2;IRAK3;ITCH;KLF4;LOC111091360;NFKBIA;NFKBIL1;NLRC5;NLRP3;OTULIN;PELI1;PIAS4;PKHD1;PRMT2;PSMD10;PTGIS;LOC111092245;RBCK1;RWDD3;SETD6;SIRT1;SIVA1;TAX1BP1;TNFAIP3;TRAF3;TRIM21;UFL1;USP7;ZC3H12A	44	13536	55	18107	0.232978	0.92626
GO:0006629	lipid metabolic process	biological_process	5	AACS;ABHD4;ALMS1;APOD;ASAH1;CIDEA;CNEP1R1;CPNE1;RBM12;ECHS1;FADS3;FADS6;FAR1;GDE1;GDPD1;GDPD5;HNF4A;IL1RN;LIPC;LIPG;LOC100686848;LOC483793;LOC612278;LRP10;MAPK3;GDPD3;MBTPS1;MGLL;NAA40;NR2F2;PITPNA;PLA1A;ADPRH;PLA2G6;PLAGL2;PLB1;PLCL1;PLCL2;PLCXD1;PLCXD2;PLCXD3;PLTP;PNPLA4;PNPLA7;PRLH;SLC16A11;SLC16A1;TRPV1	44	13536	57	18107	0.402232	0.92626
GO:0005681	spliceosomal complex	cellular_component	8	ALYREF;API5;BUD31;CCAR2;CTNNBL1;CWC15;DDX39A;DDX39B;DHX15;DHX16;DHX32;DHX35;DHX38;DHX8;DQX1;GEMIN2;HELB;HNRNPA2B1;HNRNPM;LOC609094;LOC609558;LSM5;LSM8;PABPC1;PPIH;PRPF18;PRPF4;PTBP2;RBM25;RBM5;RHEB;SF1;SF3A3;SLU7;SNRNP200;SRSF2;TFIP11;TXNL4B;U2AF2;WAC;WBP11;WBP4;ZNF326	43	13536	44	18107	4.30733e-05	0.0105639
GO:0042383	sarcolemma	cellular_component	6	ABCC9;ACTN1;AHNAK2;ANK3;ANXA1;AQP1;ATP1A3;ATP1B1;BGN;CCDC78;CIB1;CIB2;COL6A1;COL6A2;COL6A3;DAG1;DES;DLG1;DMD;DTNA;DTNBP1;FKRP;FLNC;FLOT1;FXYD1;ITGB1;KCND2;KRT19;LAMP1;LOC100855471;LOC111095870;LOC609484;PDE9A;PGM5;PLEC;SGCA;SGCB;SGCD;SGCZ;SLC2A4;SLC8A1;SLC8A3;UTRN	43	13536	47	18107	0.00351905	0.240526
GO:0030334	regulation of cell migration	biological_process	8	AJUBA;CDK5;CXCR4;DDX58;DOCK10;ERBB4;GAB1;GNA13;HACE1;ITGB3;KIF14;LAMA1;LAMA2;LAMA3;LAMA4;LDB1;LMNA;LOC111096734;LMO4;LOC102156677;LOC102156915;LOC111097621;MACF1;MINK1;LOC111096071;MYSM1;NEXN;LOC106558915;NTN1;PITX2;PLD1;PLXNA1;PLXNA2;PLXNA3;PLXNA4;PLXNB1;PLXNB2;DENND6B;PLXNC1;PLXND1;PRKX;RAC1;RTN4;SGK3;SRCIN1;SST;UNC5C	43	13536	47	18107	0.00351905	0.240526
GO:0016311	dephosphorylation	biological_process	7	ACP2;ACP5;ACP6;ACPP;ALPL;BPNT1;CTDSPL;ITGA9;ENOPH1;FBP1;FBP2;G6PC2;G6PC3;HDHD2;IMPAD1;INPP5K;LOC111091931;LOC488392;PHOSPHO2;LPIN1;LPIN2;LPIN3;MINPP1;NT5C1A;NT5C2;NT5C3A;NT5C3B;NT5C;NT5DC2;NT5DC3;NT5E;NT5M;NTPCR;NUDT16;PFKFB1;PGAM5;PPIP5K1;PPIP5K2;PSPH;PXYLP1;SGPP1;SGPP2;THNSL2;THTPA;TIGAR	43	13536	50	18107	0.0415485	0.92626
GO:0045454	cell redox homeostasis	biological_process	6	AIFM1;DDIT3;DLD;DNAJC10;DNAJC16;ERO1A;ERO1B;ERP44;GCLC;GLRX2;GLRX3;GLRX5;GLRX;GSR;LOC474798;NFE2L2;NNT;P4HB;PDIA2;PDIA3;PDIA4;PDIA5;PDIA6;PRDX4;PTGES2;QSOX1;QSOX2;RHOA;GPX1;SELENOS;SELENOT;SH3BGRL3;TMX1;TMX2;TMX3;TMX4;TXN2;TXNDC11;TXNDC12;TXNDC15;TXNDC16;TXNDC5;TXNL1;TXNRD1	43	13536	51	18107	0.074119	0.92626
GO:0006338	chromatin remodeling	biological_process	8	ACTR6;ACTR8;ANP32E;ARID1A;ARID1B;ASIC1;SMARCD1;ATRX;BPTF;BRD4;CHD1L;CHRAC1;DAXX;DMAP1;GATA3;HDAC4;HMGB1;HMGB2;HNF1A;INO80B;INO80C;INO80;KAT2B;MORF4L2;MSL3;MYSM1;NPM2;PIH1D1;RERE;RSF1;RUVBL2;SATB1;SATB2;SCMH1;SMARCA2;SMARCA4;SMARCC2;SMARCD3;SMARCE1;SOX9;TADA2A;TADA2B;TOP1;TTF1	43	13536	52	18107	0.120761	0.92626
GO:0050660	flavin adenine dinucleotide binding	molecular_function	6	ACAD11;ACAD8;ACAD9;ACADL;ACADM;ACADSB;ACADS;ACADVL;ACOX1;ACOX2;ACOX3;AGPS;AIFM2;CHDH;CYBB;D2HGDH;DHCR24;DLD;DUS1L;DUS2;DUS3L;DUS4L;ETFA;FMO3;FMO4;FMO5;FOXRED2;GCDH;GFER;GSR;IVD;KDM1A;LDHD;MTHFR;MTO1;NDOR1;NOS1;NOS2;NOS3;SDHA;SQLE;TXNRD1;XDH	43	13536	52	18107	0.120761	0.92626
GO:0002020	protease binding	molecular_function	6	ADAMTS4;ADAMTSL4;BCL10;BDKRB2;BRCA2;CASP8AP2;CD70;CFLAR;CHL1;COMP;CRADD;DPP4;DVL3;ECM1;F3;FAP;FLOT1;FN1;FURIN;IL1R1;ITGA3;ITGAV;ITGB1;KIT;LOC477699;LOC609484;LONP2;OSBPL2;ADRM1;POLG;RFFL;RNF139;TRMT12;SELL;SERPINA1;LOC111097149;SERPINE1;SRI;THAP5;TIMP3;TNFAIP3;TP53;TRIP4;TWNK;SEMA4G;TYSND1;VWF	43	13536	54	18107	0.25664	0.92626
GO:0030324	lung development	biological_process	8	ACVR2B;ADAMTS2;ALDH1A2;BAG6;BMPR1A;CCDC39;CEBPA;CHI3L1;CTGF;DHCR7;EP300;EPAS1;FGF18;FGF1;FGF2;GLI1;GLI2;GPC3;HEG1;HMGB1;HSD11B1;HSPB11;ITGA3;JMJD6;LAMA5;LOC102156677;LOC102156915;LOX;MMP14;NFIB;NOS3;NOTCH1;NPHP3;PDGFRA;PROX1;RAB3A;RIDA;SMAD2;SP3;TBX5;TIMELESS;WNT7B;ZFPM2	43	13536	55	18107	0.341429	0.92626
GO:0030509	BMP signaling pathway	biological_process	13	ACVR1;ACVR2A;ACVR2B;ACVRL1;BMP1;BMP2;BMP3;BMP6;BMP7;BMPR1A;BMPR2;EGR1;FAM83G;GDF6;GDF9;GON7;HFE;ID1;LEF1;LOC100855618;LOC102151229;LOC449531;LOC607768;LRP4;MEGF8;RGMA;RGMB;ROR2;SLC33A1;SMAD1;SMAD4;SMAD5;SMAD6;SMAD7;SMAD9;TGFBR3;TMEM100;TWSG1;UBE2D3;USP15;USP9X;VSIR;ZCCHC12	43	13536	58	18107	0.611312	0.92626
GO:0006334	nucleosome assembly	biological_process	12	ABCF2;LOC106559817;ANP32E;BRD2;CHAF1A;CHAF1B;DAXX;H1F0;H1FX;HMGB1;HP1BP3;KAT6A;KAT6B;LOC100685886;LOC100855574;LOC100856186;LOC111089949;LOC611113;LOC111090709;BOLA1;LOC403555;LOC481514;LOC483164;LOC483172;LOC483169;LOC483170;LOC488264;LOC488267;HIST1H1T;LOC488288;LOC489024;NAA60;NAP1L1;NAP1L3;NAP1L4;NAP1L5;RSF1;SART3;SET;SHPRH;SMARCA5;SMYD3;SOX9;SPTY2D1;TSPYL1;TSPYL2;TSPYL4;TSPYL5	43	13536	66	18107	0.970607	1
GO:0008380	RNA splicing	biological_process	10	ALYREF;ARL6IP4;CCAR2;CELF3;CIR1;CLASRP;DDX47;EIF4A3;HNRNPA1;HNRNPK;LOC100683228;LOC102152493;LOC479011;LOC610648;LUC7L3;MAGOHB;MAGOH;MBNL1;MBNL2;NCBP2;PABPC1;PPIH;PRPF18;PRPF38A;PTBP1;PTBP3;PUF60;QKI;RBFOX2;RBM10;RBM8A;SCAF1;SF1;SNRNP40;SREK1IP1;SRSF2;SRSF7;TARDBP;USB1;YBX1;ZNF326;ZNF638	42	13536	44	18107	0.000336988	0.0526881
GO:0045669	positive regulation of osteoblast differentiation	biological_process	9	ACVR1;ACVR2A;ACVR2B;ATP6AP1;BMP2;BMP4;BMP6;BMP7;BMPR1A;BMPR2;CAD;ATRAID;CD276;CEBPA;CTHRC1;CTNNB1;CYR61;DDR2;FAM20C;FBN2;FGF2;GJA1;IGF1;IL6ST;ILK;JAG1;JUND;LOC102151229;LOC111094605;LOC111096661;LOC449531;LTF;MEF2C;MSX2;NPNT;PRKD1;SMAD1;SMAD5;SUCO;TMEM119;WNT4;WNT7B;ZHX3	42	13536	45	18107	0.00137782	0.13371
GO:0000082	G1/S transition of mitotic cell cycle	biological_process	8	ACVR1B;ACVR1;CACUL1;CAMK2A;CAMK2D;CAMK2G;CCND1;CCNE1;CDCA5;CDK2;CDK4;CDKN1A;CDKN1B;CDKN2A;CDKN2C;CDKN2D;CDKN3;CRLF3;CUL5;INHBA;IQGAP3;ITGB1;LATS1;LATS2;MCM5;PHF8;PIAS1;PIM2;PLK2;PLK3;POLE4;POLE;PPP3CA;PRIM1;RANBP1;RBBP8;RCC1;RHOU;RPS6KB1;RRM2;SKP2;USP37	42	13536	47	18107	0.0112284	0.514452
GO:0006919	activation of cysteine-type endopeptidase activity involved in apoptotic process	biological_process	14	ACER2;AIFM1;BAD;BCL2L11;BID;CARD8;CASP8AP2;CASP9;CDKN1B;COL4A3;CRADD;CTSH;DLC1;DNAJA3;F2R;F3;FAM162A;HIP1;IFT57;LOC102152029;LOC484411;MTCH1;MUL1;NKX3-1;NLRP3;NOD1;P2RX1;PDCD2;PDCD6;PIDD1;PML;PPARG;RACK1;RET;ROBO1;RPS27L;S100A9;SENP1;SLC11A2;SMAD3;SNCA;VCP	42	13536	51	18107	0.13653	0.92626
GO:0005544	calcium-dependent phospholipid binding	molecular_function	6	ANXA11;ANXA13;ANXA1;ANXA2;ANXA3;ANXA4;ANXA5;ANXA6;ANXA7;ANXA8L1;ANXA9;C2CD4A;C2CD5;CPNE1;RBM12;CPNE3;DOC2B;DYSF;ESYT2;LOC111090913;LOC611813;MCTP1;PLA2G4A;RPH3AL;SYT11;SYT12;SYT13;SYT14;SYT16;SYT1;SYT2;SYT3;SYT4;SYT5;SYT6;SYT7;SYT9;SYTL1;SYTL2;SYTL3;SYTL4;SYTL5;TC2N	42	13536	53	18107	0.281848	0.92626
GO:0023014	signal transduction by protein phosphorylation	biological_process	8	ACVR1B;ACVR1;ACVR2A;ACVR2B;ACVRL1;BMPR1A;BMPR2;CAB39;EGFR;ERBB2;ERBB4;INSR;KCNH2;KIT;LOC106558987;LOC490277;MAP2K5;MAP3K14;MAP3K1;MAP3K2;MAP3K3;MAP3K8;MAP4K4;MINK1;LOC111096071;NEK4;OXSR1;PAK1;PAK2;PAK3;PAK4;ROS1;SLK;STK10;STK24;STK25;STK26;STK39;STK3;STK4;TAOK1;TGFB2;TGFBR2	42	13536	54	18107	0.370075	0.92626
GO:0005884	actin filament	cellular_component	11	ACKR2;ACTA1;ACTN1;AIF1L;AIF1;AMOT;APC2;ARHGAP6;BIN3;CAPZB;COBL;CORO1A;CORO1B;CTTN;CUX1;SH2B2;DMTN;DNAJA3;EZR;FKBP15;FMN1;GAS7;KEAP1;LCP1;LOC102157036;LOC491503;MARK2;MYO1B;PAWR;RAC1;RAC2;RHOQ;SRC;TEK;TPM3;TSC1;VPS11;VPS18;WHRN;WIPF1;WIPF2;YES1	41	13536	42	18107	7.39002e-05	0.0154057
GO:0031398	positive regulation of protein ubiquitination	biological_process	12	AIMP2;ANGPT1;BCL10;BIRC3;CAV1;CDK5RAP3;CHFR;ZNF605;COMMD1;DERL1;DNAJA3;FANCI;FBXO4;HSPA5;HSPBP1;LOC100856198;LOC111097407;NDFIP1;NDFIP2;NHLRC1;PAXIP1;PELI1;PHF23;GABARAP;PSMD10;RASSF1;RASSF5;RCHY1;RIPK2;RNF111;SENP2;SEPT4;SMAD7;SPHK1;SPRTN;STUB1;TBC1D7;TICAM1;TSPYL5;UBE2D1;UBE3A;UBQLN1;WFS1	41	13536	43	18107	0.000431976	0.063226
GO:0005881	cytoplasmic microtubule	cellular_component	9	APC2;APC;ARL3;AXIN1;AXIN2;BCAS3;BCL10;BICD1;BIRC5;CASC1;CKAP2;CLASP1;CLASP2;CLIP1;CLIP2;CLMP;CYLD;DCXR;DYNC2LI1;ENKD1;FAM161B;GRAMD2B;GTSE1;HDAC6;HID1;LOC100856176;LOC100856405;LOC106557476;MAP10;MAPRE3;MID1;MTUS2;RANBP10;REEP2;RGS19;RGS20;SCTR;SELENOS;SNPH;SS18;TMEM214	41	13536	44	18107	0.00173014	0.153479
GO:0001822	kidney development	biological_process	9	ACE;ACVR2B;ADAMTS1;AGTR1;AGT;ARL3;BAG6;BAX;BCL2L11;BMP6;C1GALT1;C4H5orf42;GATA3;GLI2;IFT20;JMJD6;KIF3A;LOC102153657;LOC102156972;LZTS2;MME;NLE1;ODC1;PKHD1;PROX1;PTCD2;PYGO1;PYGO2;RIDA;ROBO2;RRM2B;SGPL1;SULF1;TET2;TFAP2A;TFAP2B;TIPARP;TNS2;TSC1;WDPCP;WFS1	41	13536	45	18107	0.0053414	0.309496
GO:0016301	kinase activity	molecular_function	6	ANKS3;CAMK2G;CCNE1;CDK2AP1;CDK2;CDK5;CDK8;CERKL;CKMT1A;CLK4;COL4A3BP;COQ8A;CSNK1G3;CSNK2B;DAPK2;FN3KRP;GK5;HMGXB3;KHK;LOC100682773;MAP3K11;MAPK11;MAPK9;MINK1;LOC111096071;MOB1A;MTOR;PI4K2B;PI4KB;PIK3C2A;PKLR;PKM;PRKCB;PRKD1;PRPS1;RPS6KA6;RYK;SMG1;SPHK2;STK19;TLK2;TRRAP	41	13536	46	18107	0.0135594	0.561592
GO:0032092	positive regulation of protein binding	biological_process	7	ACE;ADD2;AKTIP;AMFR;NUDT21;ARHGEF7;ARRB1;BAMBI;BMP2;BMP4;CAPRIN2;CAV1;CDK5;CTHRC1;DACT1;DERL1;EP300;EPB41L5;EPB41;EPHB6;FLOT1;GCG;GSK3B;HERPUD1;HIPK2;LFNG;LRRK2;MEN1;MFNG;PKD1;PLXND1;RALB;RAN;RAPGEF2;RFNG;STK3;STK4;TCF7L2;TICAM1;TMEM173;USP33;VTN	41	13536	46	18107	0.0135594	0.561592
GO:0005200	structural constituent of cytoskeleton	molecular_function	4	ACTR2;ACTR3;ANK3;ARPC1B;ARPC2;ARPC3;ARPC4;ARPC5;CTNNA2;DMD;LOC100855995;LOC100856405;LOC102152648;LOC102156768;LOC106557476;LOC111097612;TUBGCP6;LOC478701;LOC610636;NDC80;NEFL;SPTBN1;SPTBN2;SPTBN4;SPTB;SYNM;TLN1;TLN2;TUBA4A;TUBA8;TUBB2B;TUBB3;TUBB4A;TUBB4B;TUBB6;TUBB;TUBD1;TUBGCP2;TUBGCP3;TUBGCP4;TUBGCP5;VIM	41	13536	51	18107	0.225142	0.92626
GO:0006887	exocytosis	biological_process	6	CADPS;CCL5;CCL8;CCR1;CDK16;UBA1;EXOC3L1;EXOC3;EXOC5;EXOC7;LIN7A;LIN7B;LIN7C;LOC102151415;LOC475149;LOC480074;VAMP4;LOC608648;LOC608858;MICAL3;MYH10;PDZD11;PRSS12;RIMS1;SCAMP1;SCRN1;SCRN2;SCRN3;SEC22A;SEC22B;SEC22C;STXBP6;SYCN;SYT17;SYTL2;SYTL5;TNFAIP2;VAMP1;VAMP3;VAMP5;VAMP7;VAMP8;VMP1	41	13536	51	18107	0.225142	0.92626
GO:0010976	positive regulation of neuron projection development	biological_process	8	ABL2;ATP8A2;AVIL;CTDSP2;CAMK1D;CBFA2T2;CNTN1;DAB2IP;DPYSL3;DVL1;EPHA3;FBXO38;FES;FGFR1;GPRC5B;LOC482687;LYN;MAGI2;MARCKS;MARK2;MOB2;NCKIPSD;NDRG4;NEGR1;NPTN;LOC111093395;NTRK1;NTRK2;PLPPR5;PRKCI;PRKD1;PTK2B;RAP1A;RAPGEF1;RAPGEF2;RETREG3;RET;SCN1B;SETX;SNX3;STMN2;TENM3;TMEM30A	41	13536	52	18107	0.308572	0.92626
GO:0043410	positive regulation of MAPK cascade	biological_process	11	ADRA1A;ADRB2;BANK1;C1QTNF1;CAV2;CCNQ;CDH2;CDK10;CDON;CTNNB1;DAB2IP;FAS;FGFR2;IGF1;IGF2;IGFBP3;IGFBP4;IL11;IL6R;IL6;KSR1;LAMTOR1;LEP;LIF;LOC609235;MYDGF;NENF;NGFR;PDGFB;PELI2;PRKCE;PSAP;RELT;RYK;SORBS3;TNFRSF11A;TNFRSF11B;TNFRSF14;TNFRSF1B;TNFRSF25;WWC1	41	13536	53	18107	0.399881	0.92626
GO:0072562	blood microparticle	cellular_component	6	AGT;ALB;ANGPTL4;APOA1;APOE;BCHE;C1QB;C1QC;C1S;C4BPA;CANT1;CIB2;CP;DNPEP;EIF2A;F13A1;FN1;GRIPAP1;GSN;LOC102154209;HSPA2;INTS11;ITIH1;ITIH2;JCHAIN;KNG1;LOC111091388;LOC474850;LOC477699;LOC607114;MSN;PFN1;PROS1;PSMC5;RASA2;ZBTB38;SERPING1;SRPRB;STOM;TFRC;TGFB1;VTN;YWHAZ	41	13536	54	18107	0.493884	0.92626
GO:0000979	RNA polymerase II core promoter sequence-specific DNA binding	molecular_function	11	CDK9;EP300;FOS;GATA3;GATA6;H2AFZ;HNF1A;HNF4A;HOXB3;HSF1;HSF2;KDM2B;LOC102151229;LOC449531;LOC481514;LOC490969;MAZ;MTF1;NFIL3;NLRC5;NR4A2;NSD1;RBPJ;RUVBL2;SMAD1;SMAD5;SMYD3;SP3;SPI1;STAT6;SUZ12;TAL1;TBP;TFAP2A;TFAP2B;WBP2;YAP1;ZFPM1;ZNF277;ZNF335	40	13536	42	18107	0.000553201	0.0768826
GO:0050731	positive regulation of peptidyl-tyrosine phosphorylation	biological_process	10	ABL1;ANGPT1;ANGPT4;ARHGEF2;CD36;CD3E;CD44;CD74;CD80;CD81;EFNA1;EFNA5;ENPP2;FCER1A;FGF7;HAX1;HGF;IL11;ITGA5;KITLG;LOC474898;MLST8;MTOR;NRP1;NTF3;PLPP3;PTK2B;RICTOR;RIPK2;SEMA4D;SRC;STK11;SYK;THBS4;TNFRSF14;TNK2;VEGFB;VEGFC;VTN;YES1	40	13536	43	18107	0.00216953	0.177363
GO:0007059	chromosome segregation	biological_process	5	ARL8B;BIRC5;CDCA2;CDK5RAP2;CENPN;CENPW;CIAO1;DSN1;ERCC2;ESCO2;FAM96A;FAM96B;HJURP;INCENP;KIF11;LOC477430;MIS18A;MMS19;NDE1;NDEL1;NEK10;NEK2;NEK9;NTMT1;PHF13;PPP1R7;RCC1;RPS3;SETDB2;PHF11;SKA1;SKA2;SKA3;SPC25;SRPK1;TLK2;TOP1;TOP2A;TOP3B;UBE2I;UVRAG	40	13536	43	18107	0.00216953	0.177363
GO:0034976	response to endoplasmic reticulum stress	biological_process	6	ALOX15;ANKS4B;BCL2L11;COL4A3BP;CREBRF;CXCL8;DDRGK1;EIF2B5;ERP27;FAM129A;FAM129C;FLOT1;HYOU1;LOC606772;NRBF2;P4HB;PDIA2;PDIA3;PDIA4;PDIA5;PDIA6;PIK3R1;PIK3R2;PPP2CB;PRKN;SCAMP5;SRPX;THBS4;TMEM259;TMX1;TMX3;TMX4;TTC23L;TXNDC11;TXNDC5;UBA5;UBE4B;UFC1;UFL1;UFM1	40	13536	44	18107	0.00656343	0.36379
GO:0003743	translation initiation factor activity	molecular_function	8	DENR;EIF1AD;EIF1AX;EIF1B;EIF1;EIF2AK2;SULT6B1;EIF2A;EIF2B1;EIF2B2;EIF2B3;EIF2B4;EIF2B5;EIF2D;EIF2S2;EIF2S3;EIF3A;EIF3B;EIF3D;EIF3E;EIF3F;EIF3H;EIF3I;EIF3J;EIF3L;EIF3M;EIF4A1;SENP3;EIF4A2;EIF4B;EIF4E2;EIF4E3;EIF4E;EIF4H;EIF5B;EIF5;LOC102156972;LOC479795;LOC611215;MCTS1;MTIF2;MTIF3	40	13536	45	18107	0.0163397	0.638293
GO:0001725	stress fiber	cellular_component	12	ABLIM1;ABLIM3;ACTA1;ACTN1;ACTN4;AMOT;CORO1B;CUX1;SH2B2;DAAM1;ENAH;FBLIM1;FERMT2;FHL3;FHOD1;FLNB;FSCN1;GAS2L1;GAS2L2;LCP1;LIMA1;LOC491973;LOC607207;MYL12B;MYH10;MYH14;MYH7;MYH9;MYL9;MYLK;NEBL;PGM5;PTK2;PXN;SEPT11;SHROOM4;SORBS1;TEK;TLNRD1;TPM3;TPM4;ZYX	40	13536	45	18107	0.0163397	0.638293
GO:0072659	protein localization to plasma membrane	biological_process	6	ABCA12;AKT2;ATP1B1;ATP1B3;BAG4;C2CD5;CLASP2;CLN3;CRB3;DENND4C;DLG1;DPP10;EFR3B;EHD2;EMP2;EPB41L3;FCER1G;FCHO2;FGF13;GPR158;LRP6;PIGW;PLEKHF1;PPIL2;PRKCZ;RAB10;RAB11A;RAB8A;RAC1;RAMP1;RAMP2;RAP2A;RAPGEF2;SCN3B;SCP2;STXBP1;SYTL2;TMEM88;ZDHHC22;ZDHHC23	40	13536	46	18107	0.0348753	0.910319
GO:0045177	apical part of cell	cellular_component	5	ABCB11;ACVR1;AFDN;APP;AQP1;AQP8;BYSL;C5AR1;CA2;CD36;CHL1;CLCN5;CLIC4;CRB3;CTNNB1;DCHS1;DPEP1;DVL2;DYNC2LI1;EPB41L4B;FAP;FAT4;FZD6;GPSM2;HFE;HOMER1;ITGA8;LGMN;LOC111095863;LOC607207;MYL12B;LOC612290;NEDD1;NF2;NUMB;OOEP;PARD6B;PATJ;USH1C;VASH1;VCAM1	40	13536	46	18107	0.0348753	0.910319
GO:0071456	cellular response to hypoxia	biological_process	6	ACAA2;ANGPT4;AQP1;BAD;CPEB1;CPEB2;EPAS1;FAM162A;FMN2;GATA6;HIGD1A;HIPK2;HMOX1;HP1BP3;HYOU1;KCND2;LMNA;LOC111096734;MDM4;MGARP;MTOR;NDRG1;NKX3-1;NPEPPS;P4HB;PPARD;PRKCE;PTEN;PTGIS;LOC111092245;PTGS2;RGCC;RORA;SFRP1;SIRT1;SLC8A3;SUV39H1;TBL2;TIGAR;TP53;UBQLN1;VASN	40	13536	46	18107	0.0348753	0.910319
GO:0032922	circadian regulation of gene expression	biological_process	8	ARNTL;ATF4;BHLHE40;BHLHE41;C17H1orf54;CIART;CAVIN3;CLOCK;CREM;CRY1;MTERF2;CRY2;CSNK1D;CSNK1E;GFPT1;HNRNPU;KDM5A;KMT2A;LGR4;LOC102152029;LOC480926;MAGED1;NAMPT;NOCT;NR1D1;NRIP1;OGT;PER1;PER3;PML;PPARA;PPARGC1A;PPP1CA;PPP1CB;PPP1CC;RAI1;RBM4B;RELB;RORA;SIRT1;TOP1;USP2	40	13536	46	18107	0.0348753	0.910319
GO:0003707	steroid hormone receptor activity	molecular_function	5	ESRRA;HNF4A;HNF4G;MAATS1;NR1I2;NR0B2;NR1D1;NR1D2;NR1H2;NR1H3;NR1H4;NR2C1;NR2C2;NR2F1;NR2F2;NR2F6;NR4A1;NR4A2;NR4A3;NR5A2;NR6A1;PAQR5;PAQR6;PAQR7;PAQR8;PAQR9;PGR;PPARA;PPARD;PPARG;RARA;RARB;RARG;RORA;RORB;RORC;RXRA;RXRB;RXRG;THRB;VDR	40	13536	46	18107	0.0348753	0.910319
GO:0005604	basement membrane	cellular_component	6	ADAMTS1;ANXA2;CASK;CCDC80;CD151;COL28A1;COL5A1;COL7A1;DAG1;EGFLAM;FBLN1;FBN1;FRAS1;FREM1;FREM2;HMCN1;HMCN2;ITGA6;LAMC1;LAMC3;LOC102153796;LOC106559497;MATN2;MMRN2;NID2;NPNT;NTN1;NTN4;P3H2;RELL2;SMOC1;SMOC2;SPN;THBS4;TIMP1;TIMP3;TINAG;TNC;VWA1;VWA2	40	13536	47	18107	0.0656621	0.92626
GO:0007015	actin filament organization	biological_process	7	ARHGAP6;ARHGEF2;BCAR1;BRK1;CORO1A;CTNNA1;DIAPH2;DLG1;EMP2;ENAH;FAT1;INPPL1;KPTN;LMOD1;LOC111097376;MAD2L2;MARCKS;NCK1;NCK2;PACSIN1;PDLIM3;PDLIM7;DBN1;PPARGC1B;PPP1R9A;PPP1R9B;PRKCI;RAC2;RHOF;RND1;RUFY3;SAMD14;SHROOM4;SORBS1;SORBS2;SORBS3;TMOD1;TMOD2;TMOD3;TMSB10;TPM3	40	13536	50	18107	0.249217	0.92626
GO:0006874	cellular calcium ion homeostasis	biological_process	10	ANXA7;APOE;ATP13A1;ATP13A2;ATP13A3;ATP1B1;ATP2A1;ATP2A2;ATP2A3;ATP2B1;ATP2B4;ATP2C1;CACNB4;CCL5;CCL8;CD40;CXCL12;DMPK;HEXB;KEL;PIK3CB;PKHD1;PLN;PRKCB;PTH1R;RMDN3;SLC24A3;SLC30A1;SLC37A4;SLC8A2;STC1;STC2;STIM2;TMEM165;TMEM203;TNNI3;TRPM8;VAPB;VDR;XK	40	13536	52	18107	0.430725	0.92626
GO:0005507	copper ion binding	molecular_function	8	AOC2;AOC3;ATP7A;ATP7B;COMMD1;CP;CUTA;CUTC;F5;F8;GPC1;HEPHL1;HEPH;KCNMB4;LACC1;LOC102151229;LOC102153535;LOC102153756;LOC102155086;LOC102155379;LOC102156686;LOC106557917;LOC111093862;LOC111094798;LOC111095249;LOC442967;LOC481187;ODF3B;LOC611632;LOXL1;LOC111093351;LOXL2;LOXL3;LOXL4;LOX;MOXD1;PRND;PRNP;S100A13;SNCA;SOD1;TP53	40	13536	81	18107	1	1
GO:0043433	negative regulation of DNA binding transcription factor activity	biological_process	13	BHLHE40;CEBPG;ESR1;EZH2;FLNA;FOXA2;FZD6;GAS6;GLIS2;HAND2;HDAC2;HDAC4;ID1;ID3;KDM1A;KEAP1;LOC102153657;MAD2L2;MAP3K10;MEN1;NR0B2;PBX1;PHB2;PIM1;PRNP;PROX1;PTCH1;RNF2;SFRP4;SFRP5;SIGIRR;SMAD7;ST8SIA5;PIAS2;SUFU;SUMO1;TAF3;TCF7L2;WFS1;WWP2	39	13536	43	18107	0.0080502	0.413352
GO:0035064	methylated histone binding	molecular_function	6	ATRX;CBX2;CBX4;CBX5;CBX7;CBX8;CDYL2;CHD8;GLYR1;ING2;ING3;ING4;ING5;KAT8;KDM4A;KDM7A;L3MBTL2;LOC491346;LOC607305;LOXL2;LRWD1;MSH6;MSL3;MTF2;NCAPG2;PHF13;PHF19;PHF2;PHF8;RBBP5;RRP8;SGF29;SPIN1;SUZ12;TDRD3;TP53BP1;UHRF1;WDR5B;WDR5	39	13536	44	18107	0.019647	0.682625
GO:0010923	negative regulation of phosphatase activity	biological_process	10	ARFGEF3;CAMSAP3;CCDC8;CD2BP2;CHP1;CNST;CSRNP2;DLG2;DLG3;ELFN1;ELL;FKBP15;GPATCH2;KNL1;MARF1;MPHOSPH10;MYO1D;PCIF1;PKMYT1;PPP1R26;PPP1R35;PPP1R36;PPP1R37;RIMBP2;RRP1B;SH2D4A;SH3RF2;SLC7A14;SPOCD1;SPRED1;SYTL2;TMEM132D;TSKS;UBN1;URI1;WDR81;WNK1;ZCCHC9;ZFYVE1	39	13536	44	18107	0.019647	0.682625
GO:0043197	dendritic spine	cellular_component	8	ALS2;ANKS1B;APP;ARF4;ASAP1;ASIC2;CNIH2;CRIPT;DLG4;DTNBP1;FBXO2;FRMPD4;FXR1;GIPC1;GRIA1;GRIA3;GRIA4;GRID2;ITGB1;KCND2;KCNN2;LRRC4;MARCKS;MPP2;MYH10;NEURL1;NR1D1;OPHN1;PDE4B;PPP1R9A;PRKAR2B;PTPRO;SEPT11;SEZ6;SHANK1;SHANK2;SHANK3;STX4;TENM2	39	13536	47	18107	0.126824	0.92626
GO:0030170	pyridoxal phosphate binding	molecular_function	6	AADAT;ABAT;ACCS;ALAS1;ALB;CBS;CSAD;CTH;DDC;GAD2;GCAT;GOT1;GOT2;GPT;KYAT1;KYAT3;LOC480654;LOC609147;MARC1;MARC2;MOCOS;NFS1;OAT;PDXDC1;PDXK;PHYKPL;PYGB;PYGL;PYGM;SDSL;SDS;SGPL1;SHMT1;SHMT2;SPTLC1;SPTLC2;SPTLC3;THNSL1;THNSL2	39	13536	50	18107	0.366339	0.92626
GO:0006364	rRNA processing	biological_process	11	CCDC86;DDX27;DDX47;DDX52;DDX56;DIS3L2;DIS3L;DIS3;EBNA1BP2;GEMIN4;GTF2H5;IMP3;LOC100856673;LOC111091303;RPP14;LTV1;MRTO4;NAF1;NOL6;NOL8;NOP2;NPM3;POP4;RBFA;RPL10;RPL11;RPL21;RPP40;RPS27L;RPS28;RPS7;RRP1B;RRP1;RRP7A;SBDS;UTP11;UTP15;UTP4;WDR36;YBEY	39	13536	52	18107	0.557682	0.92626
GO:0007286	spermatid development	biological_process	9	AFF4;ALMS1;BBS4;CELF1;CEP57;CIB1;DDX25;EHMT2;FANCG;HOOK1;HSPA2;ING2;IQCG;JAM3;KIT;LOC100855460;LOC106559190;LOC111092250;LOC111097407;MEI1;MKKS;LOC102153017;NECTIN3;NSUN2;OCA2;ODF2;OSBP2;C26H5orf52;PACRG;PANK2;REC8;SIX5;SLIRP;SMARCA4;SPINK2;STK11;STRBP;TARBP2;TRIP13;TTC26;UBE2J1	39	13536	62	18107	0.986758	1
GO:0005215	transporter activity	molecular_function	3	ABCA6;ABCC9;APOD;AQP11;CHP1;CLVS1;CPNE1;RBM12;CRABP2;FABP3;FABP4;FABP5;IGF2R;LCN2;LOC100688443;LOC100855460;LOC481674;LOC486353;MFSD14A;MFSD14B;MFSD9;NUP88;OCA2;PTGDS;RBP1;RBP4;SEC14L2;SLC15A4;SLC16A10;SLC25A38;RPSA;SLC25A4;SLC37A4;SLC46A2;STARD10;SYPL1;SYP;TMEM184A;TMEM184B;TMEM184C;TTPAL	39	13536	65	18107	0.997105	1
GO:0006396	RNA processing	biological_process	9	ADARB1;CELF2;CHERP;CRNKL1;DHX30;DHX33;DHX34;DHX35;DHX36;DHX37;DHX40;DHX57;DHX9;ELAVL4;EXOSC8;EXOSC9;GRSF1;HNRNPH1;HNRNPUL1;AXL;HNRNPU;LARP6;LARP7;LOC111092016;LOC485730;LSM7;MRM3;NRDE2;PABPC4;RBPMS;RTCA;SFSWAP;SSB;SUGP1;SUGP2;TRMT2A;TRUB2;U2SURP;YTHDC2;ZFC3H1	38	13536	41	18107	0.0033964	0.238664
GO:0003690	double-stranded DNA binding	molecular_function	8	AFF3;APTX;C15H16orf87;CGGBP1;CRY1;MTERF2;CTNNB1;DDX11;DDX58;FBXO18;HMGB1;HMGB2;HNRNPDL;KIN;LSM14A;MEN1;MTERF1;MTERF3;MTERF4;NEIL3;NEUROD1;NFIB;NTHL1;PNKP;PRKDC;RAD51AP1;RAD51B;RAD51C;RAD51D;RAD51;TARDBP;TDP1;TEF;TP73;USF1;XRCC2;XRCC3;XRCC5;XRCC6	38	13536	41	18107	0.0033964	0.238664
GO:0005484	SNAP receptor activity	molecular_function	5	BET1L;BNIP1;GOSR1;GOSR2;LOC102154542;LOC480074;VAMP4;LOC608858;SEC22A;SEC22B;SEC22C;SNAP23;SNAP25;SNAP29;SNAP47;STX10;STX11;STX12;STX16;STX17;STX18;STX19;STX1A;STX1B;STX2;STX3;STX4;STX5;STX6;STX7;STX8;TSNARE1;VAMP1;VAMP3;VAMP5;VAMP7;VAMP8;VTI1A;VTI1B	38	13536	42	18107	0.00985482	0.468685
GO:0017053	transcriptional repressor complex	cellular_component	5	ARID4A;C1D;CBX5;CCND1;CDX2;CORO2A;CTBP1;DEPDC1;ELP2;GFI1;GPS2;HDAC3;HDAC4;HDGF;HMGB1;INSM1;JAZF1;JUN;LIN37;LIN9;LOC491174;MIER1;N4BP2L2;NCOR1;PRDM16;RBBP8;RCOR1;RCOR2;RCOR3;REST;SMARCC2;SMARCE1;SP3;SPEN;TBL1X;TFAP4;ZBTB16;ZFPM1	38	13536	42	18107	0.00985482	0.468685
GO:0030307	positive regulation of cell growth	biological_process	7	ACSL4;ADAM10;ADAM17;AK6;TAF9;AKT1;CDKN2AIP;CIB1;CSNK2A1;CXCL16;DERL2;ERBB2;EXOSC4;EXTL3;FGFR1OP;FXN;HDGFL2;HPN;HYAL1;INO80;KDM2B;KRT17;LEF1;LGI1;LOC111095870;MMP14;MTPN;NCBP1;NOL8;PPP1R1C;PSMD10;SFRP1;SLC25A33;SLC44A4;SPHK1;SUPV3L1;TGFB2;TRIM32;ZNF639	38	13536	43	18107	0.0235699	0.737031
GO:0014068	positive regulation of phosphatidylinositol 3-kinase signaling	biological_process	12	AGT;ANGPT1;CBL;CCL5;ERBB4;F2RL1;F2R;FGR;FLT1;GPER1;HAX1;HCLS1;HGF;IGF1;KDR;LEP;MYDGF;MYOC;NEDD4;NKX3-1;NRG1;PDGFA;PDGFB;PDGFD;PIK3AP1;PLXNB1;PPARD;PRR5;PTK2;PTPN6;RELN;SEMA4D;SIRT1;SOX9;TEK;TGFB2;UBE3A;UNC5B	38	13536	43	18107	0.0235699	0.737031
GO:0070373	negative regulation of ERK1 and ERK2 cascade	biological_process	12	ABL1;ATF3;C23H3orf33;DAB2IP;DLG1;DMD;DUSP26;DUSP3;DUSP6;EZR;FBLN1;FLCN;GPER1;ITGB1BP1;LIF;LMO3;LOC100855640;LOC102157036;LOC491503;LYN;NDRG2;PHB;PIN1;PTPN1;PTPN2;PTPRR;RANBP9;RAPGEF1;RPS6KA6;SLC9A3R1;SPRY1;SPRY2;SPRY4;SYNJ2BP;TLR4;TNIP1;VRK3;WNK2	38	13536	44	18107	0.0484148	0.92626
GO:0016525	negative regulation of angiogenesis	biological_process	11	ADGRB1;ADGRB2;ADGRB3;AMOT;ANGPT2;ANGPT4;APOH;CCL2;COL4A3;CX3CR1;DAB2IP;ECSCR;FOXO4;GPR4;GTF2I;HHEX;HOXA5;LOC102152029;NF1;PDE3B;PML;PTPRM;RGCC;ROCK1;ROCK2;SEMA3E;SEMA4A;SERPINF1;SPARC;STAB1;SULF1;TCF4;TEK;THBS1;THBS2;TIE1;TNMD;VASH1	38	13536	44	18107	0.0484148	0.92626
GO:0001938	positive regulation of endothelial cell proliferation	biological_process	7	ACVRL1;AGGF1;AKT1;BMP2;BMP4;BMP6;BMPR2;CAV2;CCL24;CDH13;CXCL12;ECM1;EGFL7;EGR3;F3;FGF2;JUN;KDR;LRG1;MYDGF;NF1;NRARP;PDCD6;PDCL3;PDGFB;PLXNB3;POLD4;PRKCA;PRKD1;PRKD2;PROX1;SCG2;SIRT1;TGFBR1;THBS4;VASH2;VEGFB;ZNF580	38	13536	44	18107	0.0484148	0.92626
GO:0030855	epithelial cell differentiation	biological_process	7	ACADVL;ALDOC;ANXA4;ANXA7;BARX1;BDH2;BMP7;CASP6;CBFA2T2;CDK1;CES1;CNN3;CPT1A;CTSB;DNPH1;EHF;ELF3;FZD1;FZD2;HNRNPH3;ID3;LGALS3;LOC102152873;NR5A2;PCNA;PIH1D1;PTER;RARG;SIX1;TAGLN2;TAGLN;TCF21;TGFB1I1;TOLLIP;TPP1;TST;VDAC1;VIL1	38	13536	47	18107	0.216419	0.92626
GO:0007601	visual perception	biological_process	9	AIPL1;AOC2;C1QTNF5;MFRP;CACNB2;CHRNB2;CLN5;CLN6;CLN8;COL1A1;CRYBA4;DNAJC19;DRAM2;EPAS1;GJD2;GLRB;HSF4;IMPG2;LAMB2;LAMC3;LOC484444;LUM;MYO7A;NOB1;OLFM2;OPA1;PDCL;PDE6D;PDE6H;PITPNA;PPT1;RDH10;ROM1;RP1;RPGR;RRH;LRIT3;SLITRK6;UNC119;WFS1	38	13536	74	18107	0.999996	1
GO:0000781	chromosome, telomeric region	cellular_component	12	CDK2;CHEK1;CHEK2;DCLRE1B;DYDC2;EID3;LOC102151191;LOC102153058;LOC102153836;LOC102154125;LOC106557691;LOC106560206;CCDC34;LOC111095260;LOC111096315;LOC111096743;LOC111098412;LOC489372;LRIF1;NSMCE2;ORC1;POLD1;POLR2B;PPP1CB;PPP1CC;RAD17;RIF1;SMC6;SMCHD1;TERF2;THOC1;THOC3;THOC5;THOC6;THOC7;TOX4;TP53BP1;WDR82;WRNIP1	38	13536	115	18107	1	1
GO:0010501	RNA secondary structure unwinding	biological_process	9	AGO2;AGO3;DDX10;DDX17;DDX18;DDX19A;DDX19B;DDX1;DDX20;DDX21;DDX23;DDX24;DDX25;DDX27;DDX28;DDX31;DDX39A;DDX39B;DDX42;DDX46;DDX47;DDX49;DDX50;DDX51;DDX52;DDX54;DDX56;DDX59;DDX5;DDX6;DHX36;EIF4A1;SENP3;EIF4A2;EIF4A3;LOC475337;LOC482480;TDRD12	37	13536	39	18107	0.0011546	0.120348
GO:0045732	positive regulation of protein catabolic process	biological_process	9	APC2;APC;ATG7;AXIN1;C4BPA;C4BPB;CDKN1B;CREBRF;CSNK2A1;CUL4B;DAB2IP;FOXO1;FZR1;GGA1;GGA3;GPC3;ITCH;LPCAT1;MYLIP;NDFIP1;NEDD4;NKD1;OAZ2;PPP2R3A;PRKN;RAB7A;RHBDD3;RILP;SMURF2;SNF8;SOX9;STX5;TIPARP;TNFSF12;TRIM32;VIP;ZNF268	37	13536	40	18107	0.00423967	0.271042
GO:0005793	endoplasmic reticulum-Golgi intermediate compartment	cellular_component	9	CA4;CHP1;CLN8;CNIH4;DDHD2;ERGIC1;FN1;GNPNAT1;GOLGB1;HMGB1;HSPA5;INPP5B;IST1;KDELR1;LMAN1;LMAN2;LOC100686682;LOC474642;LOC609055;MAN1A1;P4HB;PTPN2;RAB37;RAB6B;RER1;RGMB;SCYL1;SERPINH1;SLC35C2;STX17;SURF4;TMED10;TMED1;TMED3;TMED5;TMED7;YIF1A	37	13536	40	18107	0.00423967	0.271042
GO:0070936	protein K48-linked ubiquitination	biological_process	12	AMFR;NUDT21;CDC34;HACE1;ITCH;KLHL3;MARCH6;NEDD4L;PELI1;PRKN;RFFL;RNF115;RNF126;RNF146;RNF152;RNF216;RNF34;RNF5;RNF6;SYVN1;TNFAIP3;TTC3;UBE2A;UBE2B;UBE2C;UBE2D1;UBE2D2;UBE2D3;UBE2E1;UBE2E2;UBE2E3;UBE2G2;UBE2H;UBE2K;UBE2Q2;UBE2T;UBE3A;ZNRF1	37	13536	41	18107	0.0120398	0.529509
GO:0043966	histone H3 acetylation	biological_process	10	AK6;TAF9;BRCA2;BRD1;BRPF1;DR1;ELP3;EP300;ING4;ING5;JADE1;JADE3;KAT14;PET117;KAT6A;KAT6B;KAT7;LEF1;LOC102155671;LOC475708;LOC608766;LOC608905;MAP3K7;MBIP;PER1;POLE3;POLE4;SAP130;SGF29;SPI1;SUPT7L;TADA1;TADA3;TAF10;TAF12;TAF5L;TAF6L;WDR5B;WDR5	37	13536	41	18107	0.0120398	0.529509
GO:0017148	negative regulation of translation	biological_process	9	BTG2;CAPRIN1;CELF4;CIRBP;CNOT1;CNOT2;CNOT3;CNOT9;CPEB3;DAPK1;DAPK3;EIF2AK2;SULT6B1;EIF4A3;EIF4E2;EIF4ENIF1;ENC1;EPRS;FMR1;FXR1;FXR2;GIGYF2;GRB7;IGFBP5;ILF3;IREB2;LOC610648;LOC611215;MALSU1;PURA;RIDA;RNF139;TRMT12;RPS3;SAMD4A;SYNCRIP;TIA1;TOB1;TSC1	37	13536	41	18107	0.0120398	0.529509
GO:0005518	collagen binding	molecular_function	6	ABI3BP;ADGRG1;ANTXR1;ASPN;C1QTNF1;CHADL;COCH;COMP;CTSB;CTSK;CTSS;DCN;DDR1;DDR2;HSD17B12;LOC111094605;LRRC15;LUM;MMP13;MRC2;NID1;NID2;PAK1;PCOLCE;PDGFA;PDGFB;PODN;LOC106558831;RELL2;SERPINH1;SMAD3;SMAD4;SMAD7;SPARC;TGFBI;THBS4;TNXB;VWF	37	13536	41	18107	0.0120398	0.529509
GO:0005543	phospholipid binding	molecular_function	5	AGAP1;AMPH;APOA1;APOB;APOE;APOH;ARHGAP26;ARHGAP44;BAD;DGKA;F3;GLE1;MARCKS;NBEAL1;NBEAL2;NR5A2;NSMAF;NUP35;NUP62;IL4I1;OPHN1;PACSIN1;PLA2G7;PLEKHA3;PRKCI;PSD2;PSD4;PSD;SGIP1;SNCA;SPTBN1;SPTBN2;SPTBN4;SPTB;TICAM2;VAMP2;WDFY3;WDFY4	37	13536	42	18107	0.028209	0.818326
GO:0051287	NAD binding	molecular_function	6	ADH4;BDH2;CTBP1;CTBP2;GAPDHS;GAPDH;GLYR1;GPD1L;GPD1;GRHPR;HIBADH;HPGD;HTATIP2;IDH1;IDH2;IDH3A;IDH3B;IDH3G;LOC100683724;LOC100688969;LOC106559190;LOC106560188;LOC475815;LOC607327;LOC607890;LOC608055;LOC610301;ME1;ME2;ME3;NDUFS2;NDUFV1;NNT;PARP1;PHGDH;SORD;UGDH	37	13536	43	18107	0.0568167	0.92626
GO:0031532	actin cytoskeleton reorganization	biological_process	7	ANTXR1;ANXA1;ATP2C1;BRSK2;CAPN10;CDC42BPA;CDC42BPG;CXADR;DTNBP1;EPS8;EZR;FARP2;FBRSL1;FER;FGF7;FLNA;GPR65;INSRR;KIT;MINK1;LOC111096071;MKLN1;MYH9;PAK1;PARVA;PARVB;PHACTR1;PIP5K1A;PLEK;PTPN1;RALA;RAP2A;RICTOR;S100A9;S1PR1;S1PR2;SHC1;SIPA1L1	37	13536	43	18107	0.0568167	0.92626
GO:0005903	brush border	cellular_component	6	ACTN1;ACTN4;ACTR3;ADD3;AQP1;CAPZA2;CAPZB;CUBN;DCXR;DNM1L;ENPEP;EPS8;EZR;FLII;FLNB;LCTL;LIMA1;LOC607207;MYL12B;MME;MYH10;MYH14;MYH9;MYL6;MYO15B;MYO1B;MYO1C;MYO1D;MYO1E;PLEC;PLS1;SLC2A2;SLC34A3;SOAT2;TPM3;USH1C;VCL;VIL1	37	13536	44	18107	0.101227	0.92626
GO:0001755	neural crest cell migration	biological_process	9	ACVR1;ALX1;EDNRB;EFNB1;ERBB4;FGF19;GDNF;HIF1A;ISL1;KITLG;LAMA5;LEF1;LOC102156677;LOC102156915;OVOL2;RET;SEMA3A;SEMA3B;SEMA3C;SEMA3D;SEMA3E;SEMA3F;SEMA3G;SEMA4A;SEMA4C;SEMA4D;SEMA4F;SEMA5A;SEMA5B;SEMA6A;SEMA6B;SEMA6C;SEMA6D;SEMA7A;SOX10;TWNK;SEMA4G;ZEB2	37	13536	44	18107	0.101227	0.92626
GO:0005811	lipid droplet	cellular_component	9	ABHD4;ABHD5;ACSL3;ACSL4;AIFM2;ALOX15;BCAP31;CIDEA;CIDEB;CKAP4;CYB5R3;DFFA;DGAT2;EHD1;FAF2;HILPDA;HSD17B11;LDAH;LOC106559834;LPCAT1;LPCAT2;LSS;NSDHL;PLIN2;PLIN3;PLIN5;PNPLA2;PRPF19;RAB3GAP1;RAB5A;RAB7A;REPIN1;ZBED6CL;LRRC61;RSAD2;SET;SPART;CCDC169;TRAF6;VCP	37	13536	45	18107	0.162943	0.92626
GO:0008344	adult locomotory behavior	biological_process	5	ADAM22;APP;ARCN1;ATP1A3;BTBD9;CHL1;CNP;CXCL12;DNM1;EN1;EPS8;FGF12;GIGYF2;HOXB8;HOXD11;HOXD10;HOXD9;KBTBD4;LGI4;LOC488636;MECP2;NR4A2;NTAN1;NTSR1;PAFAH1B1;PARK7;PBX3;PPT1;PREX2;PRKN;PUM1;SEZ6L2;SEZ6;SLITRK6;SNCA;SNCG;TBCE;TMOD1	37	13536	45	18107	0.162943	0.92626
GO:0042733	embryonic digit morphogenesis	biological_process	10	ALX4;B9D1;BMP4;BMPR1A;C2CD3;C4H5orf42;CHST11;CTNNB1;ECE1;FBXW4;FLVCR1;GJA1;GLI2;GNA12;GNAQ;GRHL2;HAND2;HOXA11;IFT122;IFT52;IMPAD1;INTU;LMBR1;LNPK;LRP5;MKS1;OSR1;OSR2;ROR2;SMAD4;TBC1D32;TBX3;TMEM107;TMEM231;TRAF3IP1;TULP3;WDPCP	37	13536	45	18107	0.162943	0.92626
GO:0000902	cell morphogenesis	biological_process	7	ARHGEF2;CAP1;CAP2;CAPZB;COL4A3BP;CSNK1A1;ECT2;EGFR;FRYL;FRY;HGF;IL7R;LOC111098945;LST1;MAPK14;MED1;NOX4;NRG1;P2RX7;PSMB10;PTPRO;RP2;SART3;SHROOM1;SHROOM3;SIDT2;SLC39A3;SOX6;SS18;SSH1;STK4;STRADB;TBCC;TENM3;TGFB2;VDR;YAP1	37	13536	46	18107	0.2409	0.92626
GO:0019827	stem cell population maintenance	biological_process	9	BMPR1A;CDC73;CTR9;DDX6;DIS3L2;EIF4ENIF1;FZD7;KLF4;LIF;LOC102157048;LOC111091360;LOC111092487;LSM1;MED10;MED12;MED14;MED17;MED21;MED24;MED27;MED28;MED30;MED7;METTL14;MTF2;NKAP;PAF1;PHF19;RIF1;RTF1;SETD6;SMC1A;SMC3;STAT3;TBX3;TPT1;TRIM8	37	13536	53	18107	0.838837	0.972031
GO:0051965	positive regulation of synapse assembly	biological_process	8	ADGRB1;ADGRB2;ADGRB3;ADGRL1;AMIGO1;AMIGO2;AMIGO3;ASIC2;BDNF;BHLHB9;CBLN2;CLSTN2;CLSTN3;CUX2;EFNA5;EPHB1;EPHB2;EPHB3;FLRT2;FLRT3;LOC479600;LRRC24;LRRC4B;LRRN3;LRRTM2;MECP2;NLGN3;NRXN1;NTRK1;NTRK2;PTPRD;SLITRK2;SLITRK4;SLITRK6;SRPX2;SYNDIG1;TPBG	37	13536	53	18107	0.838837	0.972031
GO:0005623	cell	cellular_component	3	BMP6;CCL8;CENPE;CGA;DNAJC16;DPYSL2;ERP44;FAM155B;FAM3B;FTH1;GSR;HK1;HMGB1;ISL1;KEL;LCN2;LOC102151415;LOC111098020;LOC477072;LOC481426;LOC608550;LOC611632;MCPH1;MEI1;OLFM1;PRKAA1;SLC37A4;SLIT1;SPIRE1;TGFBR1;TMX2;TRAF3IP2;TREM1;TTC7A;TXNDC15;VCL;XK	37	13536	54	18107	0.885716	0.99779
GO:0008076	voltage-gated potassium channel complex	cellular_component	8	ABCC9;AMIGO1;CNTN2;CNTNAP1;CNTNAP2;CTTN;DLG2;DLG4;DPP6;KCNA1;KCNA3;KCNA5;KCNA6;KCNAB2;KCNB1;KCNC4;KCND1;KCND2;KCNE3;KCNF1;KCNG1;KCNG3;KCNIP1;KCNJ11;KCNJ2;KCNK2;KCNMA1;KCNMB2;KCNMB4;KCNQ1;KCNQ3;KCNQ4;KCNS3;KCNT2;LOC102156059;LOC106558987;SUMO1	37	13536	59	18107	0.986217	1
GO:0032722	positive regulation of chemokine production	biological_process	8	ADAM17;ADORA2B;EIF2AK2;SULT6B1;FAM227A;FFAR1;FFAR3;FFAR2;HAVCR1;IL6R;IL6;LBP;LOC102151615;LOC102151812;LOC102153553;LOC102154270;LOC102154664;LOC102155568;LOC102156502;LOC102156665;LOC102157331;LOC106558034;LOC106558374;LOC106558823;LOC106559437;LOC111090201;LOC111090312;LOC111091236;LOC111092180;LOC111092398;LOC111093339;LOC111096242;LOC111097161;LOC111097271;MAPK9;RIPK2;TLR2;TLR4;TLR7	37	13536	120	18107	1	1
GO:0030374	ligand-dependent nuclear receptor transcription coactivator activity	molecular_function	7	ACTN1;ACTN4;ATXN7L3;BUD31;CALCOCO1;CARM1;CCAR1;CCDC62;DCAF6;ENY2;GLMP;GON7;HELZ2;KDM1A;MED1;NCOA1;NCOA2;NCOA6;NCOA7;PKN1;PPARGC1A;PPARGC1B;PPARG;PPRC1;PRKCB;PSMC3IP;RARG;SFR1;SLC30A9;SMARCD3;SS18;TADA3;USP22;WDR77;ZCCHC12;ZMIZ2	36	13536	37	18107	0.000282261	0.0458509
GO:0006302	double-strand break repair	biological_process	10	ABRAXAS1;ACTR5;APLF;APTX;BABAM2;BAZ1B;BRCC3;CDCA5;CHEK2;DDX1;DTX3L;ERCC1;ESCO2;EYA1;EYA3;GGN;KAT5;MAD2L2;MARF1;MRE11;MSH2;MTA1;PARP3;PARP9;RECQL4;RNF168;RNF8;SETX;SMARCA5;TDP1;TDP2;TRIP13;UIMC1;VCP;WRN;XRCC4	36	13536	37	18107	0.000282261	0.0458509
GO:0019003	GDP binding	molecular_function	9	ARL2;ARL3;ARL8B;GEM;GNAI1;KRAS;RAB10;RAB11B;RAB17;RAB18;RAB21;RAB22A;RAB27A;RAB27B;RAB28;RAB29;RAB2A;RAB31;RAB35;RAB3B;RAB4A;SPHAR;RAB5A;RAB7A;RAB8A;RAB8B;RAB9A;TCEANC;RALA;RALB;RAN;RAP2B;RAP2C;RHOB;RRAGC;RRAS;SRP54;TRIM23	36	13536	37	18107	0.000282261	0.0458509
GO:0006606	protein import into nucleus	biological_process	6	ADAR;CHRNA10;NUP98;CRY2;CSE1L;DRD1;HEATR3;HIKESHI;IPO13;IPO7;IPO8;KPNA3;KPNA5;KPNA6;LOC100686305;NUP107;NUP133;NUP155;NUP188;NUP214;NUP50;NUP58;NUP62;IL4I1;NUP85;NUP88;NUP93;NXT1;PPP3CA;RAE1;RANBP1;RPAIN;SIX2;SNUPN;STAT3;TMCO6;TNPO3;TXNIP	36	13536	38	18107	0.00147221	0.140568
GO:0004197	cysteine-type endopeptidase activity	molecular_function	8	ATG4A;ATG4B;ATG4C;ATG4D;BLMH;CASP10;CASP12;CASP4;CASP9;CTSB;CTSC;CTSF;CTSH;CTSK;CTSO;CTSS;CTSZ;ESPL1;LGMN;LOC102156614;RCE1;SFRP1;TINAGL1;TINAG;UCHL1;USP10;USP12;USP13;USP15;USP16;USP20;USP33;USP34;USP37;USP49;USP7	36	13536	39	18107	0.00528356	0.309496
GO:0032587	ruffle membrane	cellular_component	8	ABCA7;ADAM17;AIF1;AKT2;ARF4;ARHGEF2;BMX;C2CD5;CLASP2;DDX58;DLC1;EEF1A1;EPB41L5;EPS8L1;EPS8L2;EPS8;FGR;HSP90AA1;INPP5K;ITGA5;ITGAV;ITGB1;KANK1;LOC102155289;MACF1;PACSIN1;PDXP;PIP5K1A;PLEKHA1;PLEKHO1;PLEK;RAC1;RPS3;SH3YL1;SRC;WWC1	36	13536	39	18107	0.00528356	0.309496
GO:0032091	negative regulation of protein binding	biological_process	7	ACE;AURKA;AURKB;TRNAD-GUC;BAX;CAMK1;CARM1;CAV1;CCM2L;CKMT1A;DAB2;DACT1;DVL1;EPB41L5;GNL3L;GSK3B;IFIT2;ITGB1BP1;KDM1A;LOC488947;LRPAP1;LRRK2;MAPK8;MITD1;NES;NFATC4;PARK7;PDGFB;RALB;ROCK1;SLPI;STUB1;TDG;TMBIM6;USP33;WFIKKN2;ZFPM1	36	13536	40	18107	0.0146786	0.594097
GO:0009055	electron transfer activity	molecular_function	3	ACAD11;ACAD8;ACAD9;ACADL;ACADM;ACADSB;ACADS;ACADVL;ACOX1;ACOX2;ACOX3;CIAPIN1;CYBA;CYBB;CYC1;ETFA;ETFB;CLDND2;ETFDH;FDX1;GCDH;GLRX2;GLRX3;GLRX5;GLRX;IVD;NDUFA12;NDUFAF2;NDUFS1;PTGES2;RAVER1;FDX1L;SDHB;SDHC;SH3BGRL3;TXNRD1;UQCR11;XDH	36	13536	40	18107	0.0146786	0.594097
GO:0030175	filopodium	cellular_component	6	ABI1;ABI2;ACPP;ACTG2;ACTN2;B4GALT1;CDK5;CXADR;DAG1;DYNC1H1;ENAH;EZR;FAT1;FGD4;FGF13;FSCN1;IQGAP2;ITGB1;LCP1;LOC106558660;LOC111097376;LOC608648;MSN;MTM1;MYO1B;MYO3A;NF2;PPP1R9A;PPP1R9B;RAPGEF3;RDX;RUFY3;SHTN1;TENM2;TWF2;TLR9;VCAM1	36	13536	41	18107	0.0336778	0.894356
GO:0000149	SNARE binding	molecular_function	5	ANKRD27;EXOC3L1;EXOC3;GOSR1;GOSR2;LOC480074;VAMP4;LOC608858;NBAS;SEC22A;SEC22B;SEC22C;SNAPIN;STX10;STX11;STX16;STX17;STX19;STX1A;STX1B;STX2;STX3;STX4;STX5;STX6;STX7;STX8;TNFAIP2;TSNARE1;UVRAG;VAMP1;VAMP3;VAMP5;VAMP7;VAMP8;VTI1A;VTI1B	36	13536	43	18107	0.116241	0.92626
GO:0050728	negative regulation of inflammatory response	biological_process	8	ABR;ACP5;ADA;ADORA2A;APOA1;APOE;CD276;CHRNA7;ETS1;FEM1A;FOXF1;GATA3;GPER1;HGF;ISL1;METRNL;NDFIP1;NFKB1;NLRX1;NOV;NR1H3;NT5E;OTULIN;PPARA;PTGER4;PTGIS;LOC111092245;PTPN2;RABGEF1;RORA;SMAD3;SOCS3;TNFAIP6;TNFRSF1A;TNFRSF1B;WFDC1;ZFP36	36	13536	46	18107	0.36208	0.92626
GO:0045666	positive regulation of neuron differentiation	biological_process	11	BEND6;BMP2;BMP4;BMP6;BRINP2;CDON;CPNE1;RBM12;CYB5D2;DAB1;ECT2;GDF6;GDPD5;GLI2;HMG20B;HOXD3;IMPACT;IRX3;KCTD11;LOC479761;LOC487403;MINOS1;MEF2C;MMD;NCOA1;NEUROD1;NKX2-2;NKX6-1;RARB;RGS6;SPAG9;TCF12;TCF3;TCF4;TGIF2;TLE6;TRIM32;ZEB1	36	13536	47	18107	0.462232	0.92626
GO:0060395	SMAD protein signal transduction	biological_process	10	ATOH8;BMP1;BMP2;BMP3;BMP4;BMP6;BMP7;BTBD11;C37H2orf88;FOS;GDF11;GDF15;GDF6;GDF9;HEXA;HIPK2;HNF1A;HNF4A;INHBA;INHBB;JUN;LOC100855618;LOC607768;MAGI2;NCEH1;ROR2;SLC33A1;SMAD1;SMAD2;SMAD3;SMAD4;SMAD5;SMAD9;TGFB2;TGFB3;VIM	36	13536	49	18107	0.653596	0.92626
GO:0007267	cell-cell signaling	biological_process	6	ADRA1A;ADRA2A;ADRA2B;ADRB2;BARX1;BHLHA15;CCL5;CCL8;CCR1;CCR5;CD70;CTGF;CXCL14;CYR61;EREG;FJX1;FZD2;GJA1;GREM1;LNPEP;LOC478038;LOC111092012;LOC489534;LVRN;NOV;NTF3;PANX1;PPY;SFRP2;SST;STAB1;TBX5;TNFSF18;WISP1;WISP2;WISP3;WNT2	36	13536	58	18107	0.989019	1
GO:0046854	phosphatidylinositol phosphorylation	biological_process	10	BPNT1;EFR3B;ERBB4;EREG;FAM126A;IMPA1;IMPA2;IMPAD1;INPP1;IP6K2;PI4K2A;PI4KA;PI4KB;PIK3C2A;PIK3C2B;PIK3C2G;PIK3C3;PIK3CA;PIK3CB;PIK3CD;PIK3CG;PIK3R1;PIK3R2;PIK3R6;PIKFYVE;PIP4K2A;PIP4K2B;PIP4K2C;PIP5K1A;PIP5K1B;PIP5K1C;PTPN11;SMG1;ST6GALNAC4;PIP5KL1;TTC7B	35	13536	37	18107	0.00187491	0.158456
GO:0008286	insulin receptor signaling pathway	biological_process	10	AKT1;AKT2;ATP6V1D;BAIAP2L1;BAIAP2;CAV2;CUX1;SH2B2;EIF4EBP2;FOXC2;FOXO1;FOXO4;GPLD1;GRB2;GSK3A;INSR;IRS1;IRS2;KL;PDK2;PDK4;PHIP;PIK3R1;PIK3R2;PTPN1;PTPN2;PTPRA;RHOQ;SHC1;SLC2A8;SMARCC1;SOCS7;SOGA1;SORBS1;SREBF1;STXBP4	35	13536	37	18107	0.00187491	0.158456
GO:0051289	protein homotetramerization	biological_process	10	ACACA;ACACB;ACOT13;ACTN2;ALDH5A1;CBR4;CDA;CRTC1;CTH;DCTPP1;DCXR;DECR1;DNM1L;EVL;FBP1;GBP5;GLS;GNMT;GPX3;HPRT1;IMPDH2;KCNJ2;LOC106558660;NAXE;PCBD1;PCBD2;RXRA;RXRG;SAMHD1;THG1L;TK1;TRPA1;TRPM8;USP16;VASP	35	13536	37	18107	0.00187491	0.158456
GO:0008168	methyltransferase activity	molecular_function	6	BUD23;ECE2;FAM53B;EEF1AKMT2;KIAA1456;KMT2D;LOC480074;VAMP4;METTL12;METTL13;METTL18;METTL21A;METTL23;METTL24;METTL25;METTL4;METTL5;METTL6;MRM3;N6AMT1;NDUFAF5;NSUN3;NSUN4;NSUN5;NSUN6;NSUN7;PRDM5;PRMT3;PRMT9;SMYD4;SMYD5;SPOUT1;TRMT10A;TRMT10B;TRMT11;TYW3;ZCCHC4	35	13536	38	18107	0.00657311	0.36379
GO:0043087	regulation of GTPase activity	biological_process	14	AJUBA;ARHGAP1;ARHGAP35;ARHGAP8;BVES;CHN1;CHN2;CRK;DAB2IP;EFNA5;EPHA3;EPHA5;EPHB3;GAPVD1;IQGAP3;ITGB1BP1;MLST8;MTOR;NF1;NTRK2;PAFAH1B1;PLXNB1;PLXNB2;DENND6B;PLXNB3;PRKG1;PROM2;RAP1GAP;RASIP1;RICTOR;SOD1;STMN3;SYDE1;SYDE2;TSC1;VAV2	35	13536	38	18107	0.00657311	0.36379
GO:0001889	liver development	biological_process	8	ACADM;ADA;ARF6;CEBPA;CITED2;COBL;EP300;GATA6;HGF;HLX;HNF1A;JUN;LBP;LSR;MAN2A1;MED1;NF1;NOTCH1;ONECUT1;ONECUT2;PDX1;PIK3CA;PKD1;PRKCSH;PTCD2;RARG;RB1CC1;RELA;RHBDD3;SEC63;SMAD3;SOD2;SP3;UPF2;WNT4	35	13536	38	18107	0.00657311	0.36379
GO:0030512	negative regulation of transforming growth factor beta receptor signaling pathway	biological_process	12	ADAM17;ASPN;BAMBI;BCL9L;CAV1;CAV2;CD109;CHST11;CIDEA;FAM89B;GLG1;HSPA5;HTRA3;LDLRAD4;LEMD3;NEPN;ONECUT1;ONECUT2;PBLD;PDPK1;PIN1;PMEPA1;PPM1A;PRDM16;RASL11B;SIRT1;SKIL;SMAD6;SMAD7;SMURF2;SNX25;STRAP;STUB1;TGFB1I1;VASN	35	13536	40	18107	0.0401032	0.92626
GO:0001047	core promoter binding	molecular_function	9	AGO2;CALCOCO1;CCAR1;CLOCK;DHX36;E2F1;E2F3;E2F7;E2F8;EP300;EZH2;FOXO3;GADD45A;GTF2B;HDAC4;HDAC5;HDAC6;HNRNPU;INSM1;IRF9;KDM3A;KLF4;LOC111091360;LOC475337;MED1;MTA1;NKX3-1;NOTCH1;POLR2A;RBMX;RELB;REST;SAFB;ZMYM5;PSPC1;ZNF281	35	13536	41	18107	0.0775851	0.92626
GO:0007417	central nervous system development	biological_process	8	ADGRA2;ALDH3A2;ALDH5A1;B3GNT5;BTD;CITED2;CSK;DCLK1;DNER;ELP3;EVL;FXR1;FYN;HAPLN1;HAPLN3;HAPLN4;ID3;LIG4;LOC102155259;LYN;MBP;NDN;NMUR2;PRKN;ROBO2;RPS6KA6;SH3GL1;SRC;STK3;STK4;THOC6;VCAN;VNN1;ZBTB16;ZEB1	35	13536	41	18107	0.0775851	0.92626
GO:0030276	clathrin binding	molecular_function	5	AFTPH;AP2B1;C2CD4A;CLBA1;DOC2B;HIP1R;HIP1;LOC611813;LRRK2;NCALD;PICALM;RPH3AL;SMAP1;SNAP91;SYT11;SYT12;SYT13;SYT14;SYT16;SYT1;SYT2;SYT3;SYT4;SYT5;SYT6;SYT7;SYT9;SYTL1;SYTL2;SYTL3;SYTL4;SYTL5;TC2N;TOM1L1;TOM1	35	13536	44	18107	0.295438	0.92626
GO:0000187	activation of MAPK activity	biological_process	13	AVPI1;BMP2;C1QTNF2;CD81;EFNA1;EGF;ERP29;FRS2;HGF;INSR;IQGAP3;KIT;LOC100855825;LPAR3;LRRK2;MADD;MAP2K1;MAP2K2;MAP2K3;MAP2K6;MAP3K11;MAP3K5;MAP3K7;MAPKAPK2;MUC20;NTF3;P2RX7;PAK3;PDE6H;PTPN11;SHC1;SHC2;SOD1;THBS1;TLR4	35	13536	46	18107	0.496059	0.92626
GO:0042995	cell projection	cellular_component	5	ABI2;ACTR2;AGFG1;ANKS1B;ARHGEF7;ARPC4;CFAP100;COQ6;CPEB3;CTTNBP2;DNAL1;DTNA;EVL;FAM92A;LOC111093163;FBRSL1;GAS8;GRIA4;GTF2I;HNRNPK;KCNIP1;LOC111097407;LOC478678;MAGI1;MINK1;LOC111096071;NDN;PDE6D;PPP1R16B;PROM2;SH3GL1;ST6GALNAC4;PIP5KL1;TBC1D10A;TENM3;UBXN10;UNC5A;WDR66	35	13536	47	18107	0.59472	0.92626
GO:1902476	chloride transmembrane transport	biological_process	9	ANO10;ANO1;ANO2;ANO5;ANO6;ANO8;CFTR;CLCA2;CLCA4;CLCN3;CLCN4;CLIC1;CLIC2;CLIC3;CLIC4;CLIC5;CLIC6;GABRB3;GLRB;NMUR2;SLC12A2;SLC12A4;SLC12A6;SLC12A7;SLC12A9;SLC17A7;SLC1A4;SLC26A11;SLC26A1;SLC26A2;SLC26A5;SLC4A2;SLC4A3;TTYH2;TTYH3	35	13536	63	18107	0.999726	1
GO:0002755	MyD88-dependent toll-like receptor signaling pathway	biological_process	9	FAM227A;LOC100687463;LOC102151615;LOC102151812;LOC102153553;LOC102154270;LOC102154664;LOC102155568;LOC102156502;LOC102156665;LOC102157331;LOC106558034;LOC106558374;LOC106558823;LOC106559437;LOC111090201;LOC111090312;LOC111091236;LOC111092180;LOC111092398;LOC111093339;LOC111096242;LOC111097161;LOC111097271;MYD88;REG3A;TLR1;TLR2;TLR4;TLR5;TLR6;TLR7;TLR8;TNIP1;TWF2;TLR9	35	13536	118	18107	1	1
GO:0003755	peptidyl-prolyl cis-trans isomerase activity	molecular_function	6	CWC27;FKBP10;FKBP11;FKBP1A;FKBP1B;FKBP2;FKBP3;FKBP4;LOC102155834;FKBP5;FKBP7;FKBP8;FKBP9;FKBPL;LOC102156058;LOC474539;NKTR;PIN1;PPIA;LOC111094992;PPIB;PPIC;PPID;PPIE;PPIF;PPIG;PPIH;PPIL1;PPIL2;PPIL3;PPIL4;PPIL6;PPWD1;PTPA;TTC9C;TTC9	34	13536	37	18107	0.00816261	0.413352
GO:0048013	ephrin receptor signaling pathway	biological_process	10	AP2A1;AP2B1;ARPC2;CDK5R1;CHN1;CRK;EFNA1;EFNA3;EFNA4;EFNA5;EFNB1;EFNB2;EFNB3;EPHA1;EPHA2;EPHA3;EPHA4;EPHA5;EPHA6;EPHA7;EPHB1;EPHB2;EPHB3;EPHB4;EPHB6;GIT1;NCK2;PAK3;PTK2;PTPN11;ROCK2;SIPA1L1;SS18;VAV2	34	13536	37	18107	0.00816261	0.413352
GO:0032947	protein-containing complex scaffold activity	molecular_function	4	AKAP9;ASIC1;SMARCD1;CAPN3;CAV1;CAV2;CHCHD3;CNOT1;DISC1;DLG1;GPHN;ISCU;KIAA0368;LAMTOR1;LAMTOR2;LAMTOR3;LAMTOR4;LOC102157248;LOC111091118;LOC111097407;MAGI1;MAGI2;MAGI3;MAP2K2;MPP7;PAXX;PKP2;SASH1;SEPT2;SLC9A3R1;SLC9A3R2;TELO2;WWC1;WWC2;WWC3	34	13536	37	18107	0.00816261	0.413352
GO:0045171	intercellular bridge	cellular_component	5	AAMP;AURKB;TRNAD-GUC;BCL3;C10H12orf66;C11H9orf72;CD34;CDC7;CDCA8;CEP131;CEP55;DNAJC8;EAF1;ESRRA;FAN1;IQCB1;KIF23;LOC102153861;LYRM1;PCIF1;PIK3CB;PPP1R13L;PRKCI;QSOX1;RAB35;RFXANK;SNRNP25;SP4;SRA1;TDP2;THAP11;THOC1;UNC119;USB1;XPA	34	13536	37	18107	0.00816261	0.413352
GO:0005758	mitochondrial intermembrane space	cellular_component	12	AIFM1;AK2;ARL2BP;ARL2;BLOC1S1;CHCHD4;CHCHD8;CIAPIN1;COX17;COX19;CYCS;FBXL4;GATM;HAX1;HTRA2;ITPR3;LOC111098223;LOC111092250;LOC486776;MICU1;MICU2;MYOC;NDUFA8;NDUFS1;NLN;OPA1;PNPT1;PRELID1;PRELID2;PRELID3A;PRELID3B;SIRT5;THOP1;TIMM29;TIMM8A	34	13536	40	18107	0.0902576	0.92626
GO:0071230	cellular response to amino acid stimulus	biological_process	7	BCL2L1;CAPN2;COL16A1;COL1A1;COL1A2;COL3A1;COL4A1;COL4A6;COL5A2;COL6A1;CPEB3;CPEB4;DNMT3A;EGFR;LAMTOR1;LAMTOR2;LAMTOR3;LAMTOR4;LOC111093016;LOC111094296;MMP2;NEURL1;NSMF;NTRK2;PDGFD;PDGFRA;RPTOR;RRAGA;RRAGB;RRAGC;RRAGD;SH3BP4;SLC38A9;ZEB1	34	13536	40	18107	0.0902576	0.92626
GO:0060271	cilium assembly	biological_process	7	ACTR3;AHI1;ARL3;ASAP1;ATMIN;AVIL;CTDSP2;C31H21orf2;CEP131;CEP290;CFAP20;CFAP221;DYNLL1;FAM92A;LOC111093163;GFY;GSN;LOC102154209;IFT43;IFT52;IQUB;KIF3A;LOC111097407;PTPDC1;PTPN23;RABL2B;SEPT7;TBC1D32;TCTN1;TCTN2;TCTN3;TROVE2;TTC21A;TTC21B;UBXN10;UNC119B;WWTR1	34	13536	41	18107	0.15181	0.92626
GO:0051865	protein autoubiquitination	biological_process	11	AMFR;NUDT21;ASB4;BRCA1;CNOT4;DDB2;ERCC8;LTN1;MARCH5;PRKN;RCHY1;RNF115;RNF11;RNF13;RNF141;RNF146;RNF181;RNF185;RNF220;RNF41;STUB1;TRAF2;TRAF6;TRIM21;TRIM68;UBE2A;UBE2B;UBE2D2;UBE2D3;UBE2T;UBE3A;UBE4B;UHRF1;UHRF2;WWP2	34	13536	41	18107	0.15181	0.92626
GO:0071347	cellular response to interleukin-1	biological_process	8	ADAMTS12;ADAMTS7;ANKRD1;CACTIN;CCL17;CCL20;CCL23;CCL24;CCL25;CCL2;CCL5;CCL7;CCL8;CX3CL1;CXCL8;DAB2IP;HAS2;HIF1A;HYAL1;HYAL2;HYAL3;IFRD2;IL6;LOC480601;LOC480603;MYLK3;NFKB1;NKX3-1;PTGIS;LOC111092245;RBMX;RELA;RORA;SFRP1;SOX9	34	13536	43	18107	0.325441	0.92626
GO:0006006	glucose metabolic process	biological_process	9	AKT1;ALDH5A1;APOD;CACNA1A;DCXR;G6PD;GALM;GAPDHS;GAPDH;GCK;H6PD;HK2;IGFBP5;INPPL1;INS;KCNJ11;LEP;LOC100683724;LOC100688969;LOC106559190;LOC106560188;MAPK14;NPY1R;OAS1;ONECUT1;PDX1;PGM1;ROR1;PGM2;PGM5;PIK3CA;PRKAA1;TFAP2B;USF1;WDTC1	34	13536	44	18107	0.427453	0.92626
GO:0009615	response to virus	biological_process	7	ACTA2;APOB;BCL3;CCL5;CCT5;CDK6;CHRM2;CXCL12;DCLK1;DDX1;DDX21;DHX36;DHX58;EIF2AK2;SULT6B1;GATA3;GTF2F1;HNRNPUL1;AXL;HSPB1;HYAL1;HYAL2;HYAL3;IFI44;IFRD2;LCN2;LOC484356;MEF2C;MX2;MYD88;NPC2;ODC1;PIM2;STMN1;URI1;XPR1	34	13536	44	18107	0.427453	0.92626
GO:0035725	sodium ion transmembrane transport	biological_process	7	ASIC1;SMARCD1;ASIC2;CNNM4;HCN2;HCN3;HCN4;KCNK1;LOC106557725;LOC478773;PKD2;SCN1B;SCN2B;SCN3A;SCN3B;SCN5A;SCN7A;SCN8A;SCN9A;SCNN1A;SCNN1B;SLC17A7;SLC20A1;SLC20A2;SLC24A3;SLC34A3;SLC8A1;SLC8A2;SLC8A3;SLC9A5;SLC9A6;SLC9A7;SLC9A8;SLC9A9;TRPM5	34	13536	56	18107	0.993254	1
GO:0005930	axoneme	cellular_component	9	AMBRA1;ARL13B;ATG14;ATG16L1;ATG5;BBS1;BBS5;CCDC39;CCNA2;BBS7;CCSAP;CFAP54;DCDC2;DYNC2LI1;GAS8;GLI1;GLI2;IFT172;IFT57;INPP5E;KIFAP3;LOC102151816;LOC102153657;LOC111095863;MAP1LC3B;MAPT;MNS1;PIK3R4;SEPT7;SPAG16;SPATA7;TCTEX1D4;TRAF3IP1;TTLL3;TULP3	34	13536	57	18107	0.996077	1
GO:0030182	neuron differentiation	biological_process	9	ACSL4;AIFM1;ALDH1A2;BRSK1;CDK5;ELAVL4;EMX2;FZD4;GAS7;HDAC9;HIPK1;HIPK2;ITM2C;LDB1;LOC102151229;LOC111097105;LOC449531;MAP2K1;NAPA;NIF3L1;PIGT;PROX1;PTPRD;RYK;S1PR1;SMARCA1;TRAPPC9;WNT11;WNT2;WNT3;WNT4;WNT5B;WNT7B;WNT9A	34	13536	59	18107	0.998753	1
GO:0032147	activation of protein kinase activity	biological_process	12	ACVR2B;CAB39;CCNQ;CLSPN;DAXX;DBF4B;DLG1;ECT2;EMP2;FGF13;GPRC5B;HMGB1;KIF14;MAP4K4;MAPK8IP2;MINK1;LOC111096071;NCKAP1L;NKX3-1;PDGFB;PIK3CA;PPP2R3C;PRKAG2;LOC106559811;RGCC;RIPK3;SLC11A1;STK11;STRADA;STRADB;TGFB2;TGFBR2;TOM1L1;TPX2;WNT11	33	13536	34	18107	0.000626013	0.0837345
GO:0010212	response to ionizing radiation	biological_process	6	ABRAXAS1;AEN;ATM;BABAM2;BRCC3;BRSK1;CLK2;DCLRE1C;EYA1;EYA3;INIP;INTS3;SLC27A3;KAT5;MTA1;NABP1;NABP2;SLC39A5;NHEJ1;PAXIP1;RAD51B;RAD51C;RAD51D;RAD51;RAD54B;RAD54L;RFWD2;RNF168;STK11;TICRR;TOPBP1;UIMC1;USP28;XRCC2;XRCC3	33	13536	34	18107	0.000626013	0.0837345
GO:0090502	RNA phosphodiester bond hydrolysis, endonucleolytic	biological_process	10	AGO2;CPSF3;CPSF4;DBR1;DICER1;EDC3;ENDOV;ERN1;FEN1;LOC102155597;LOC111091303;RPP14;MIR8903;MRPL44;NOB1;POP1;POP4;POP5;POP7;RIDA;RNASEH1;RNASEH2A;RNASEH2C;RNASEK;RNASET2;RPP21;RPP30;RPP38;RPP40;SMG6;TSEN15;TSEN2;TSEN34;TSEN54	33	13536	35	18107	0.0030291	0.217747
GO:0005694	chromosome	cellular_component	9	BANF1;BLM;BOD1;BRCA1;C4H1orf131;CDCA2;CENPB;CLOCK;EHMT1;EHMT2;FAM208A;INTS7;LOC477430;MEAF6;NSMCE2;PPP1R7;PRPF4B;PRR14L;PRR14;RECQL4;RECQL5;RECQL;RHNO1;SETD2;SETD7;SETDB1;SETDB2;PHF11;SETMAR;SIRT2;STAG2;SUV39H2;TOP3A;UVSSA	33	13536	36	18107	0.0101172	0.477534
GO:0043022	ribosome binding	molecular_function	5	ABCF1;BAG6;CPEB1;CPEB2;CPEB3;CPEB4;EFL1;EIF2A;EIF5A2;EIF5A;GCN1;GTPBP6;GUF1;HSPA5;IGHMBP2;IMPACT;LETM1;LETM2;LETMD1;LOC111093016;MRPL58;MTOR;MTRF1L;MTRF1;NAA10;NAA16;OLA1;PYM1;RICTOR;SBDS;SEC61A2;SPCS1;YTHDF1	33	13536	36	18107	0.0101172	0.477534
GO:0045111	intermediate filament cytoskeleton	cellular_component	10	BCAS3;CHD3;CLK3;CTNS;EIF1AD;ERAL1;EVPL;FAAP100;ING4;IP6K2;LOC487172;LOC100855970;MRPS23;MTRR;NDOR1;NFATC4;NFKBIL1;NSFL1C;NUP35;PHLDB2;PKN2;PLEC;PSMD10;SAP30BP;SMARCA2;SMG7;STAG2;STN1;STUB1;STXBP4;SYNE2;TACC1;XRN1;ZNF175	33	13536	38	18107	0.0564023	0.92626
GO:0005788	endoplasmic reticulum lumen	cellular_component	11	CALR;CLN6;CLU;COLGALT1;COLGALT2;DNAJB11;DNAJC10;DNAJC3;EDEM3;EOGT;ERAP1;ERAP2;ERLEC1;ERP29;FAM20C;FOXRED2;HSP90B1;HSPA5;KDELC1;KDELC2;LOC111091702;OS9;PDIA4;POGLUT1;SELENOF;TOR1A;TOR1B;TOR2A;TOR3A;FAM20B;TXNDC12;TXNDC16;TXNDC5;WNT7B	33	13536	38	18107	0.0564023	0.92626
GO:0051603	proteolysis involved in cellular protein catabolic process	biological_process	8	ADAMTS12;ADAMTS7;CAPN2;CASP8;CLPP;CLPX;CTSA;CTSB;CTSC;CTSF;CTSH;CTSK;CTSO;CTSS;CTSZ;DNAJC3;FAP;HSPA5;IDE;LGMN;LOC102156614;PSMB10;PSMB1;PSMB2;PSMB3;PSMB4;PSMB6;GLTPD2;PSMB7;PSMB8;PSMB9;SCPEP1;TINAGL1;TINAG	33	13536	39	18107	0.10467	0.92626
GO:0043154	negative regulation of cysteine-type endopeptidase activity involved in apoptotic process	biological_process	13	AKT1;ARRB1;BIRC5;CD44;CDKN2D;CRYAB;CSNK2A1;DHCR24;DNAJA3;DNAJB6;DPEP1;EP300;FNIP1;GAS6;HGF;IGBP1;KLF4;LAMTOR5;LEF1;LOC100684448;LOC102151313;LOC111091360;MICAL1;MKL1;RHOA;GPX1;RPS6KA1;SH3RF1;SNCA;SRC;TFAP2B;THBS1;TNFAIP8;VIL1	33	13536	39	18107	0.10467	0.92626
GO:0050680	negative regulation of epithelial cell proliferation	biological_process	6	BMP4;CDC73;CDK6;CDKN2B;DAB2IP;DLG1;EREG;GPC3;HPN;IFT122;IFT172;IFT52;IFT57;IFT74;IFT80;LOC480926;MCC;MEF2C;MTSS1;NKX3-1;PBLD;PEX2;PPARD;PTCH1;PTEN;RIDA;SAV1;SFRP1;SOX9;STRAP;TGFB1;TGFB2;TINF2	33	13536	39	18107	0.10467	0.92626
GO:0030674	protein binding, bridging	molecular_function	5	AMFR;NUDT21;ANXA1;ARPC4;CAV1;CAV2;CBX5;CNKSR1;CNTLN;COL1A2;CRADD;DDX20;DSP;DVL2;DVL3;EVPL;FBXW7;FRMD4A;FSCN1;GATAD2A;GPHN;MEN1;NEFL;NMD3;OPTN;PPP2R3A;PPP4R2;RAD50;STUB1;TCAP;TJP2;TRIM22;VPS11;VPS18	33	13536	43	18107	0.46191	0.92626
GO:0050885	neuromuscular process controlling balance	biological_process	8	AARS;ABL1;ABR;ADCY5;ALDH1A3;APP;BLOC1S4;CACNA1A;CAMTA1;CLN3;CLN8;CNTNAP1;DLG4;GAA;GIGYF2;GM2A;GPR88;HERC1;HEXA;HEXB;JPH3;JPH4;LRRC45;RAC3;MYH10;NEFL;NLGN2;NR4A3;NRXN1;PAFAH1B1;RBFOX2;SHANK1;SLC1A3;TPP1	33	13536	43	18107	0.46191	0.92626
GO:0042626	ATPase activity, coupled to transmembrane movement of substances	molecular_function	12	ABCA12;ABCA1;ABCA2;ABCA3;ABCA5;ABCA7;ABCA8;ABCA9;ABCB10;ABCB11;ABCB1;ABCB4;ABCB6;ABCB7;ABCB8;ABCC10;ABCC1;ABCC3;ABCC4;ABCC5;ABCC6;ABCC8;ABCC9;ABCD1;ABCD2;ABCD3;ABCD4;ABCG2;ATP6V1D;LOC478384;TAP1;TAP2;VPS37B	33	13536	45	18107	0.660968	0.92626
GO:0005044	scavenger receptor activity	molecular_function	5	ACKR2;ACKR3;ACKR4;CANT1;CD163;CD5L;CD6;CFI;CXCL16;DMBT1;ENPP1;ENPP2;HHIPL1;CYP46A1;HPN;LOC610335;LOXL2;LOXL3;LOXL4;MARCO;MSR1;PRG4;PRSS12;SBSPON;SCARA5;SCARF1;SSC5D;STAB1;SUSD2;TINAGL1;TINAG;TMPRSS13;TMPRSS2;VTN	33	13536	47	18107	0.813895	0.972031
GO:0031122	cytoplasmic microtubule organization	biological_process	7	ATAD1;AXIN1;CEP126;CHP1;CIB1;CRIPT;DVL1;FIGNL1;FIGNL2;FIGN;HOOK3;IFT172;KATNA1;KATNAL1;LOC100856176;LOC102156982;LOC106559441;LOC111090088;LOC111094371;LOC111097612;TUBGCP6;MAP10;PCM1;PLK3;SLAIN2;SPAST;STMN3;TUBG1;TUBGCP2;TUBGCP3;TUBGCP4;TUBGCP5;VPS4A;VPS4B	33	13536	51	18107	0.961475	1
GO:0006289	nucleotide-excision repair	biological_process	10	BRCA2;CETN2;DDB1;ERCC2;ERCC5;GTF2H1;GTF2H2;GTF2H3;HUS1;KCNMB4;LOC102151229;LOC102151348;LOC102153535;LOC102153756;LOC102155086;LOC102155379;LOC102156686;LOC106557917;LOC111093862;LOC111094798;NEIL1;NEIL2;NEIL3;POLL;RAD23A;RAD51D;RBBP8;RPA1;RPA2;RPA3;SLX4;TP53;XPC	33	13536	66	18107	0.999996	1
GO:0042346	positive regulation of NF-kappaB import into nucleus	biological_process	11	FAM227A;GREM1;IL18R1;IL18;LOC102151615;LOC102151812;LOC102153553;LOC102154270;LOC102154664;LOC102155568;LOC102156502;LOC102156665;LOC102157331;LOC106558034;LOC106558374;LOC106558823;LOC106559437;LOC111090201;LOC111090312;LOC111091236;LOC111092180;LOC111092398;LOC111093339;LOC111096242;LOC111097161;LOC111097271;RBCK1;SPHK1;TCIM;TLR2;TLR3;TLR4;TLR7	33	13536	120	18107	1	1
GO:0007252	I-kappaB phosphorylation	biological_process	9	CHUK;DAB2IP;ERC1;FAM227A;IKBKB;IKBKE;LOC102151615;LOC102151812;LOC102153553;LOC102154270;LOC102154664;LOC102155568;LOC102156502;LOC102156665;LOC102157331;LOC106558034;LOC106558374;LOC106558823;LOC106559437;LOC111090201;LOC111090312;LOC111091236;LOC111092180;LOC111092398;LOC111093339;LOC111096242;LOC111097161;LOC111097271;MAP3K7;TLR2;TLR3;TLR4;TLR7	33	13536	115	18107	1	1
GO:0004402	histone acetyltransferase activity	molecular_function	10	AK6;TAF9;ATF2;CLOCK;CREBBP;ELP3;EP300;EPC1;ING3;KAT14;PET117;KAT2B;KAT5;KAT6A;KAT6B;KAT7;LOC102155671;LOC475708;LOC608766;LOC608905;METTL8;NCOA1;NCOA2;SAP130;SUPT7L;TADA1;TADA2A;TADA2B;TADA3;TAF10;TAF12;TAF5L;TAF5;TAF6L	32	13536	34	18107	0.00384217	0.258068
GO:0000045	autophagosome assembly	biological_process	8	ATG101;ATG12;ATG13;ATG14;ATG16L1;ATG2B;ATG3;ATG4A;ATG4B;ATG4C;ATG4D;ATG5;ATG9A;CTSD;EMC6;GABARAPL1;GABARAPL2;MAP1LC3A;MAP1LC3B;MAP1LC3C;PHF23;GABARAP;PSEN1;RAB1A;RAB23;RB1CC1;TP53INP1;TP53INP2;TRAPPC8;WDR45B;WDR45;WIPI1;WIPI2	32	13536	34	18107	0.00384217	0.258068
GO:0048146	positive regulation of fibroblast proliferation	biological_process	6	AQP1;CD74;CDK4;CDK6;CDKN1A;CTC1;DDR2;E2F1;EGFR;EREG;ESR1;FBLN1;FBRS;FN1;FNTB;FOSL2;GAS6;IGF1;ITGB3;JUN;LIG4;LOC102152029;LOC111094605;NDUFS4;PDGFA;PDGFB;PML;SIRT6;SPHK1;WAPL;WNT2;ZMIZ1	32	13536	35	18107	0.0125149	0.529509
GO:0006749	glutathione metabolic process	biological_process	8	ALDH5A1;CLIC1;CLIC2;CLIC3;CLIC4;CLIC5;CLIC6;CTNS;EEF1E1;EEF1G;ETHE1;G6PD;GDAP1;GGT5;GGT6;GGT7;GLRX2;GPX3;GSR;GSTO1;GSTZ1;IDH1;LOC100686488;LOC477556;LOC477558;LOC479911;LOC479912;LOC486404;MGST1;RHOA;GPX1;SOD1;SOD2	32	13536	35	18107	0.0125149	0.529509
GO:0016740	transferase activity	molecular_function	4	ABI1;CAMK2G;CDK2;CDK8;CLK4;CSNK1G3;DAPK2;ELOVL4;ELOVL5;ELOVL7;ILF2;KAT7;KHK;LOC100682773;LOC111092805;MAP3K11;MAPK11;MAPK9;METTL21A;METTL23;MID2;MINK1;LOC111096071;MOCOS;MRPL2;NDUFAF6;OASL;PIGN;PRKCB;RNF139;TRMT12;RYK;SMURF2;TLK2	32	13536	35	18107	0.0125149	0.529509
GO:0005901	caveola	cellular_component	7	BMPR1A;BMPR2;C38H1orf226;CAV1;CAV2;CAVIN1;CAVIN3;CDH13;DLC1;EFNA5;EHD2;EMP2;F2R;HDAC6;HTR2A;INSR;IRS1;KCND2;KIF18A;LOC609484;LRP6;LRRK2;NOS1;NOS3;PACSIN2;PTCH1;PTGIS;LOC111092245;RANGRF;SCARB1;SRC;TGFBR2;VAMP2	32	13536	36	18107	0.0316966	0.843533
GO:0046332	SMAD binding	molecular_function	5	ACVR1B;ACVR1;ACVRL1;BMP2;BMPR1A;CITED2;COL1A2;COL3A1;COL5A2;DAB2;EP300;HIPK2;LOC102152029;LOC111094296;LOC612523;MAGI2;MEF2A;PML;PRDM16;PURA;PURB;SKIL;SKI;SMURF2;SNW1;STUB1;TCF12;TGFBR2;TGFBR3;TGFBRAP1;TOB1;USP15	32	13536	36	18107	0.0316966	0.843533
GO:0031594	neuromuscular junction	cellular_component	4	ACHE;APP;CAMK2D;CDK5;CIB2;COL4A5;DES;DLG1;DLG2;DNAJA3;FCHSD1;FCHSD2;HDAC4;ITGB1;LOC608697;MYH10;MYH9;NRG1;P2RX7;PDZRN3;PRKACA;PRKAR1A;SERPINE2;SLC8A3;SPOCK1;SYNGR1;SYNGR3;TBC1D24;THBS4;UNC13A;UNC13B;UTRN	32	13536	37	18107	0.0665999	0.92626
GO:0005876	spindle microtubule	cellular_component	10	ARL3;AURKA;AURKB;TRNAD-GUC;BIRC2;BIRC3;BIRC5;BOD1;CALM3;CAPN6;CDC16;CDC27;CDK1;CSNK1D;HAUS2;HDAC3;KIF11;KIF2A;KIFAP3;LOC100856176;LOC102155336;NCOR1;NEIL2;NUSAP1;PARP4;PLK1;POLB;PSRC1;SKA1;SKA2;SPAG5;TBL1X;XIAP	32	13536	37	18107	0.0665999	0.92626
GO:0005546	phosphatidylinositol-4,5-bisphosphate binding	molecular_function	9	ACTN2;ALOX15;AMER1;AMER2;ASAP1;CADPS;COMMD1;FCHO2;FRMPD4;KCNJ2;KCNQ1;LDLRAP1;LOC102153142;LOC102156469;LOC106558660;LOC475149;LOC608648;LOC610874;MAPKAP1;MYO1B;PARD3;PFN1;RAB35;SESTD1;SNX18;SNX21;STXBP6;SYT1;SYT7;SYTL2;TWF2;TLR9;VIL1	32	13536	38	18107	0.120987	0.92626
GO:0032880	regulation of protein localization	biological_process	6	AAK1;ADCYAP1;ARHGDIA;ARHGDIG;B9D1;CELSR3;CEP120;DNAJB6;LOC100684448;LOC102151313;LOC479761;MAPK8;MMD;PICALM;PLEKHM2;PRNP;PTCH1;RAB9A;TCEANC;RABGAP1L;RACK1;RSL1D1;SEPT2;SIX1;SIX4;STX10;SWAP70;TMEM231;TRIM22;TTC8;UFL1;VIP;VPS4A	32	13536	39	18107	0.195578	0.92626
GO:0043085	positive regulation of catalytic activity	biological_process	5	ALOX5AP;APH1A;APH1B;AZIN1;AZIN2;B3GAT3;BCAS3;CCS;CFLAR;CLPS;CYB5B;DCP1A;DCP1B;DNMT3L;GM2A;GMFG;GTF2F1;IGFBP3;LRCOL1;NCSTN;NOXA1;NR4A2;OGT;PLAA;PRKCE;PRKRA;PSAP;PSEN2;RICTOR;SLC37A4;SLX4;STX4	32	13536	39	18107	0.195578	0.92626
GO:0009887	animal organ morphogenesis	biological_process	8	BRAF;CDX2;CRKL;CUL1;DGCR6L;E2F4;E2F5;EFNB2;EP300;EREG;FLI1;GAMT;GATA2;GATA3;GATA4;GATA5;GATA6;GMNN;GSK3B;LY6H;MCOLN1;PNPLA6;NEK8;PALB2;PBX1;RELA;SLIT3;SMARCC1;THRB;TLE2;TNFSF11;TRPS1;VEGFC	32	13536	39	18107	0.195578	0.92626
GO:0048306	calcium-dependent protein binding	molecular_function	5	ALG2;ANXA11;ANXA1;ANXA3;ANXA4;ANXA6;ANXA7;CHP1;CLN3;CPNE3;HNRNPM;LOC477516;LOC477699;LRRC45;RAC3;MASP1;MASP2;NSMF;PDCD6IP;PDCD6;PLSCR3;RBM22;S100A6;S100PBP;SEC31A;SLC9A1;STMN2;SYT1;SYT6;TNNI3;TSG101;VLDLR;VPS37C	32	13536	40	18107	0.287432	0.92626
GO:0005201	extracellular matrix structural constituent	molecular_function	4	COL11A1;COL1A1;COL1A2;COL24A1;COL27A1;COL3A1;COL4A1;COL4A3;COL4A4;COL4A5;COL4A6;COL5A1;COL5A2;COL5A3;ELN;FBLN1;FBN1;FBN2;FBN3;HAPLN1;HAPLN3;HAPLN4;IMPG2;LAMB1;LAMC1;LOC102156946;LOC111093353;LOC111094296;MGP;PRELP;PXDN;VCAN	32	13536	41	18107	0.390537	0.92626
GO:0045665	negative regulation of neuron differentiation	biological_process	11	APP;ASPM;BMP7;CALR;CASZ1;CDK5RAP2;CNTN2;CNTN4;CTDSP1;DDX6;DTX1;EIF4ENIF1;FUOM;HMG20A;HOXA2;IRX3;ISL1;JAG1;LMX1A;LSM1;MED1;MEIS1;MIB1;NEPRO;NKX2-2;NOTCH3;PBX1;PRPF19;RAP1GAP;REST;ZHX2;ZNF536	32	13536	42	18107	0.497284	0.92626
GO:0046330	positive regulation of JNK cascade	biological_process	13	ANKRD6;CTGF;DAB2IP;DUSP22;F2RL1;FGF19;GADD45A;GADD45B;GADD45G;HIPK2;HMGB1;HRAS;LOC102153861;MAP3K11;MINK1;LOC111096071;MYD88;NOD1;NOD2;PTK2B;RASSF2;RIPK1;RIPK2;STK3;TAOK1;TAOK2;TMEM219;TLR3;TLR4;TNFRSF19;TPD52L1;TRAF4;UNC5CL;ZNF622	32	13536	42	18107	0.497284	0.92626
GO:0043086	negative regulation of catalytic activity	biological_process	5	ACACB;ANP32E;ANXA1;ANXA2;ANXA3;ARPP19;CAND1;CCAR2;CD55;CLN3;FAF2;HSPBP1;LOC106558815;NES;NOTCH1;NQO1;OAZ1;OAZ2;PHACTR1;PHACTR2;PHACTR4;PPP1R14A;PPP1R14B;PPP1R1A;PPP1R1C;PPP1R2;RNH1;SET;TIMP3;TXNIP;UGT1A6;WDTC1	32	13536	42	18107	0.497284	0.92626
GO:0031490	chromatin DNA binding	molecular_function	5	ACTN4;ANKLE1;CLOCK;ENDOD1;LOC485120;EP300;EZH2;FOXC2;FOXO3;GRHL1;GRHL2;H1F0;INSM1;KDM5A;KDM6A;LOC481514;LOC488264;LOC489024;NKAP;NOTCH1;PER1;PITX2;PPARGC1A;RARA;RELA;RUVBL2;RXRA;SMAD3;SRF;STAT3;SUZ12;THRB;WBP2	32	13536	43	18107	0.600189	0.92626
GO:0003705	transcription factor activity, RNA polymerase II distal enhancer sequence-specific binding	molecular_function	6	BHLHE40;BHLHE41;CEBPA;CIR1;CREB1;FOXC2;FOXF1;FOXP1;GATA5;GATA6;GLI1;HIF1A;HNF1B;HNF4A;JUN;LEF1;LOC106557595;LOC476317;MEF2A;MEIS1;NFIX;NR1H4;PKNOX1;PROX1;SNAI2;SOX10;SOX7;SOX9;SRF;TFAP4;USF1;USF2	32	13536	44	18107	0.693272	0.92626
GO:0050919	negative chemotaxis	biological_process	6	APOA1;EFNA5;EPHA7;FLRT2;FLRT3;ITGAV;NRP2;PDGFA;PLXNA3;RYK;SEMA3A;SEMA3B;SEMA3C;SEMA3D;SEMA3E;SEMA3F;SEMA3G;SEMA4A;SEMA4C;SEMA4D;SEMA4F;SEMA5A;SEMA5B;SEMA6A;SEMA6B;SEMA6C;SEMA6D;SEMA7A;SLIT1;SLIT3;TWNK;SEMA4G	31	13536	32	18107	0.00106072	0.113428
GO:0015030	Cajal body	cellular_component	14	AK6;TAF9;ANGEL2;ANKS1B;CDK2;COIL;DDX46;EFTUD2;ELL;EWSR1;HINFP;ICE1;ICE2;LOC489134;LOC489420;LSM10;NOLC1;NOP58;OIP5;PRPF31;PRPF3;PRPF4;SART1;SART3;SMN;SRRM2;TOE1;USPL1;WRAP53;ZC3H8;ZNF473;ZPR1	31	13536	32	18107	0.00106072	0.113428
GO:0031901	early endosome membrane	cellular_component	11	CFTR;CLIP3;DNAJC13;EGFR;EPHA4;EPHB1;HPS6;INPP5B;LDLRAD4;LOC106558987;MARCH1;PIKFYVE;PMEPA1;PPFIBP1;REP15;RAC1;RCC2;SH3GL1;SLC9A6;SNX19;SNX1;SNX21;SNX3;SNX4;SNX5;SNX8;SYNDIG1;TMEM184A;VPS33B;WDR91;ZFYVE28;ZFYVE9	31	13536	32	18107	0.00106072	0.113428
GO:0030136	clathrin-coated vesicle	cellular_component	12	AP1G1;CLVS1;DAB2;DENND1B;DVL1;DVL2;EPN3;FAM109A;FAM109B;FCHO2;GGA2;GPR107;HIP1R;HIP1;LOC102151745;MALL;NUMB;OCRL;PICALM;SGIP1;SNAP91;SNX18;SNX3;SNX9;STON2;TNK2;VAMP2;VAMP3;VPS33B;VPS41;VTI1A	31	13536	33	18107	0.00486626	0.305865
GO:0005819	spindle	cellular_component	9	AKT1;ANXA11;ARL2BP;CBX1;CCSAP;CHAMP1;CLTCL1;CYLD;ERCC2;FMN2;HASPIN;HEPACAM2;INCENP;INVS;KIF20A;MAD2L2;MAEA;MYH10;MYH9;MZT1;MZT2B;PPP2R3C;PRC1;RPS6KA2;SAC3D1;SEPT7;SPAST;SPECC1L;SPICE1;SPIN1;TTC23L	31	13536	33	18107	0.00486626	0.305865
GO:0032508	DNA duplex unwinding	biological_process	11	ASCC3;BLM;BRIP1;CHD8;DDX11;DDX1;DNA2;FBXO18;GINS2;GINS4;HELB;IGHMBP2;INO80;LOC477937;MCM2;MCM3;MCM5;NBN;PIF1;POT1;RAD50;RECQL4;RECQL5;RECQL;RTEL1;RUVBL1;RUVBL2;SUPV3L1;WRN;XRCC5;XRCC6	31	13536	33	18107	0.00486626	0.305865
GO:0000413	protein peptidyl-prolyl isomerization	biological_process	10	CWC27;FKBP10;FKBP11;FKBP1A;FKBP1B;FKBP2;FKBP3;FKBP4;LOC102155834;FKBP5;FKBP7;FKBP8;FKBP9;LOC102156058;LOC474539;NKTR;PIN1;PPIA;LOC111094992;PPIB;PPIC;PPID;PPIE;PPIG;PPIH;PPIL2;PPIL3;PPIL4;PPIL6;PPWD1;PTPA;TTC9C;TTC9	31	13536	34	18107	0.0154485	0.60816
GO:0042645	mitochondrial nucleoid	cellular_component	12	ACADVL;CLPX;DBT;DDX28;DHX30;DNA2;DNAJA3;ELAC2;FASTKD2;FASTKD5;GRSF1;HADHA;HSPA9;KIAA0391;LOC100855532;LOC102152873;LRPPRC;LRRC59;MTERF1;POLDIP2;POLG;SHMT2;SSBP1;SUPV3L1;TFAM;TFB1M;TFB2M;TUFM;TWNK;SEMA4G;VDAC1;VDAC2	31	13536	34	18107	0.0154485	0.60816
GO:0004722	protein serine/threonine phosphatase activity	molecular_function	9	CDC14A;CDC14B;CDKN3;CTDNEP1;EPM2A;ILKAP;LOC106558366;MTMR3;MTMR4;PDP1;PDP2;PP2D1;PPA2;PPM1B;PPM1D;PPM1F;PPM1G;PPM1H;PPM1J;PPM1K;PPM1L;PPM1M;PPP1CC;PPP1R15B;PPP2R1A;PPP2R2A;PPP4C;PPP6C;PTEN;TAB1;UBLCP1	31	13536	35	18107	0.0381832	0.913185
GO:0007519	skeletal muscle tissue development	biological_process	10	CAV1;CDK5;DMD;ELN;EP300;FLNB;FOXP1;FOXP2;GPCPD1;HLX;HOXD11;HOXD10;HOXD9;KLHL31;MAPK14;MBNL1;MEF2C;MEOX2;METTL8;MYH14;MYL6;MYLPF;NF1;NR2F2;SIN3B;SIX1;SKIL;SRPK3;SVIL;TAZ;VAMP5;VGLL2	31	13536	35	18107	0.0381832	0.913185
GO:0030173	integral component of Golgi membrane	cellular_component	13	ACER2;ACER3;CUX1;SH2B2;DBNDD2;SYS1;ENTPD4;GFY;LOC609055;MFNG;PCSK7;QSOX1;QSOX2;RER1;SGMS2;SLC35B1;SLC35B3;SLC35B4;ST3GAL1;ST3GAL2;ST3GAL3;ST3GAL4;ST3GAL5;ST3GAL6;ST6GAL1;ST6GALNAC2;ST8SIA1;ST8SIA2;ST8SIA4;ST8SIA5;PIAS2;TBC1D20;TVP23A;UBIAD1	31	13536	35	18107	0.0381832	0.913185
GO:0019902	phosphatase binding	molecular_function	6	CHCHD3;CNST;CRY1;MTERF2;CSRNP2;DLG1;DLG3;DZIP3;ELFN1;ELL;MAGI2;MAPK1;MAST2;PPP1R18;PPP1R21;PPP1R26;PPP1R35;PPP1R36;PPP1R37;SBF2;SH2D4A;SH3GL1;SH3YL1;SLC9A3R1;SMAD2;SMAD3;SPRED1;SPTBN4;SYTL2;TRPC4AP;TSC2;WNK1	31	13536	35	18107	0.0381832	0.913185
GO:0030139	endocytic vesicle	cellular_component	11	AMOT;APOA1;ARF6;CUBN;DAB2IP;DPP4;DYSF;EGFR;EHD1;EHD3;FLOT2;HEATR5A;HYAL2;IGF2R;KIF5B;LRP2;PIK3C2B;PLD1;PLEKHG5;RAB11FIP4;RAB13;RAB17;RAB5A;RAB5B;RAB5C;RABEP1;RALA;RAPGEF2;SH3KBP1;SRPRB;STX7	31	13536	35	18107	0.0381832	0.913185
GO:0030155	regulation of cell adhesion	biological_process	5	ABL2;CBLL1;CXCL8;CYTH1;CYTIP;DLL1;FAF1;FES;ICAM1;JAG2;JAK2;KIF14;LAMA1;LAMA2;LAMA3;LAMA4;LMO7;LOC102152029;LOC102156677;LOC102156915;PKD1;PML;PPP1CB;PRKX;PRLR;PTK2B;PTK2;ROCK2;S1PR1;SOX9;SRF	31	13536	35	18107	0.0381832	0.913185
GO:0030145	manganese ion binding	molecular_function	8	ABL1;ABL2;ATP2C1;B4GALT1;B4GALT7;DCP2;DYRK2;FAM20C;GALNT1;GALNT2;GALNT3;HMGCL;IDI1;IMPA1;LAP3;LARGE1;LOC111091931;ME1;MRE11;MTPAP;NPEPL1;NUDT16;NUDT7;PEPD;PIM1;PPEF1;PPM1A;PPM1B;TDP2;XPNPEP1;XPNPEP3	31	13536	35	18107	0.0381832	0.913185
GO:0008104	protein localization	biological_process	5	AKAIN1;AKAP10;AKAP3;ALS2;BIN3;CADM3;CCNA2;BBS7;CDAN1;CNTD1;CUTA;DDX42;DHCR24;DOC2B;ERCC3;GRIP1;HEATR5A;IMMP2L;KIF26A;KIF26B;KIF5A;KIF5B;KIF5C;KIFAP3;MAPK8IP3;MECP2;MLH3;NBEA;NEDD8;ODF2;PLOD3;STK11IP	31	13536	36	18107	0.0784006	0.92626
GO:0030968	endoplasmic reticulum unfolded protein response	biological_process	8	AARS;AMFR;NUDT21;ATF3;ATF6B;ATF6;BHLHA15;CCND1;CDK5RAP3;CREB3L1;CREB3L2;CREB3L3;DDIT3;DERL1;DERL2;DERL3;EDEM1;EDEM2;EDEM3;EIF2AK2;SULT6B1;EIF2AK3;ERO1A;HERPUD1;PPP1R15A;SELENOS;SERP2;STC2;STUB1;SYVN1;TBL2;WFS1;YOD1	31	13536	36	18107	0.0784006	0.92626
GO:0009411	response to UV	biological_process	7	BRSK1;CASP3;CASP7;CCAR2;CDKN2D;CIRBP;DTL;ERCC8;HUS1;LOC102152029;MAP4K3;CDKL4;MAPK8;MEN1;MSH6;PML;PRIMPOL;PRKAA1;RAD18;REV1;RPAIN;SPRTN;TIPIN;TRIM32;TROVE2;UBE2A;UBE2B;UBE4B;USF1;USP1;UVSSA;ZRANB3	31	13536	38	18107	0.220786	0.92626
GO:0050852	T cell receptor signaling pathway	biological_process	8	BCL10;CACNB3;CACNB4;CARMIL2;CD247;CD3E;DENND1B;FYN;GATA3;HRAS;ITK;LCP2;MAPK1;PAK3;PDE4B;PDE4D;PLCG1;PLCG2;PRKD2;PSEN1;PTPN22;PTPRC;RBCK1;RFTN1;RIPK2;SHB;STK11;THEMIS2;THY1;TRAF6;UBE2N	31	13536	39	18107	0.318467	0.92626
GO:0048538	thymus development	biological_process	6	ABL1;BCL2L11;BRAF;CACNB4;CARMIL2;CCNB2;CITED2;CRKL;CTC1;CTNNB1;EPHB3;FADD;GATA3;HAND2;HOXA3;LMO4;MAD1L1;MAFB;MAP2K1;MAP2K2;MAPK1;PAX1;PBX1;PSEN1;RAF1;RIPK3;SIX1;SIX4;SLC46A2;SRF;ZBTB1	31	13536	39	18107	0.318467	0.92626
GO:0008543	fibroblast growth factor receptor signaling pathway	biological_process	10	CEP57;CTGF;FGF10;FGF12;FGF18;FGF19;FGF1;FGF22;FGF2;FGF5;FGF7;FGFR2;FGFR4;FGFRL1;FLRT2;FLRT3;FRS2;FRS3;HNRNPH1;HNRNPM;IQGAP1;KIF16B;KLB;KL;NDST1;PTBP1;PTPN11;SETX;SHCBP1;TIA1;TIAL1	31	13536	40	18107	0.425366	0.92626
GO:0004715	non-membrane spanning protein tyrosine kinase activity	molecular_function	9	ABL1;ABL2;BMX;BTK;CSK;DYRK1A;FER;FES;FGR;FRK;FYN;HCK;ITK;JAK1;JAK2;JAK3;LCK;LYN;MELK;PTK2B;PTK2;SRC;SYK;TEC;TNK1;TNK2;TYK2;WEE1;WEE2;YES1;ZAP70	31	13536	41	18107	0.533335	0.92626
GO:0007596	blood coagulation	biological_process	6	ANO6;AP3B1;BLOC1S6;CD177;DTNBP1;F13A1;F2RL1;F2RL2;F2;F3;GAS6;HNF4A;HPS4;HPS5;HPS6;IL10RB;JMJD1C;LNPK;LOC111095525;MMRN1;MPIG6B;PABPC4;PAPSS2;PDGFA;PDGFB;PDGFD;PLG;RAB27A;RAD51B;SERPINE2;TFPI	31	13536	41	18107	0.533335	0.92626
GO:0008584	male gonad development	biological_process	8	ASPM;BCL2L11;BCL2L1;CITED2;CSDE1;EIF2S2;ERCC1;ESR1;FANCA;GATA3;GATA4;GATA6;HMGB2;HOXA10;HOXA11;HOXA9;INHBA;INSR;KITLG;KIT;LRRC6;MAMLD1;MSH2;NKX3-1;NUPR1;PATZ1;LOC106557811;PITX2;PRDX4;SFRP1;SIX4;WNT4	31	13536	44	18107	0.799627	0.972031
GO:0003774	motor activity	molecular_function	9	CCDC102A;CGNL1;CGN;DNAL1;DYNC1I1;DYNLL1;DYNLRB1;DYNLRB2;KLC1;LOC608648;MYH11;MYH14;MYH1;MYH7B;MYL6;MYO10;MYO15B;MYO16;MYO18A;MYO19;MYO1B;MYO1C;MYO1D;MYO1E;MYO1F;MYO5A;MYO5B;MYO5C;MYO6;MYO7B;MYO9A	31	13536	47	18107	0.936653	0.99779
GO:0042391	regulation of membrane potential	biological_process	5	ACTN2;ASIC1;SMARCD1;ASIC2;BVES;CACNA1H;CHRNA7;CHRNB1;DLD;DLG1;FAM19A4;GLRB;GRIK3;HCN2;HCN3;HCN4;KCNH2;KCNH6;KCNJ11;KIF5B;LOC106558660;LOC106558987;LOC488636;NEDD4;POPDC3;RIMS2;SLC26A11;SLC26A1;SLC26A2;SLC26A5;TRPM4;WWP2	31	13536	55	18107	0.999111	1
GO:0045078	positive regulation of interferon-gamma biosynthetic process	biological_process	9	CD276;CEBPG;FAM227A;LOC102151615;LOC102151812;LOC102153553;LOC102154270;LOC102154664;LOC102155568;LOC102156502;LOC102156665;LOC102157331;LOC106558034;LOC106558374;LOC106558823;LOC106559437;LOC111090201;LOC111090312;LOC111091236;LOC111092180;LOC111092398;LOC111093339;LOC111096242;LOC111097161;LOC111097271;TLR3;TLR7;TLR8;TNFRSF13C;TWF2;TLR9;ZFPM1	31	13536	114	18107	1	1
GO:0007080	mitotic metaphase plate congression	biological_process	9	BOD1;CDC23;CDCA5;CDCA8;CENPE;CHMP1A;CHMP1B;CHMP2A;CHMP2B;CHMP4B;CHMP4C;CHMP5;CHMP6;CHMP7;CUL3;KIF14;KIF18A;KIF22;KIF2C;KIFC1;KPNB1;PIBF1;PSRC1;RAB11A;RRS1;SEH1L;SPDL1;VPS4A;VPS4B;ZW10	30	13536	30	18107	0.000160616	0.0292934
GO:0030133	transport vesicle	cellular_component	11	ANKRD27;AP1AR;AP1G2;APH1B;AZIN2;BGN;BLOC1S3;BLOC1S5;BLOC1S6;CAV2;CD55;CHP1;CNST;CRISPLD2;ERG28;FGFR3;FGFR4;FGFRL1;GALNT15;NRSN1;NRSN2;PLEKHF2;SSPN;SYT13;TMED7;TMEM168;TMEM187;YIPF1;YIPF2;YIPF3	30	13536	31	18107	0.00137903	0.13371
GO:0019005	SCF ubiquitin ligase complex	cellular_component	9	BTRC;CCNF;CUL1;FBXL15;FBXL19;FBXL2;FBXL3;FBXL5;FBXL7;FBXO17;FBXO18;FBXO25;FBXO27;FBXO2;FBXO31;FBXO32;FBXO44;FBXO4;FBXO6;FBXO9;FBXW11;FBXW5;FBXW7;FBXW8;KBTBD4;LOC102153171;PRKN;SKP1;SKP2;TRIM21	30	13536	32	18107	0.00615365	0.349239
GO:0001933	negative regulation of protein phosphorylation	biological_process	10	ANGPT1;ATG14;AVIL;CTDSP2;CACTIN;CD109;CHP1;CTDSP1;DAB2IP;DNAJC10;FAM129A;FAM129C;IGFBP3;INPP5K;INSM1;KIRREL1;KIRREL2;LRRK2;MICAL1;PID1;PLPP3;PRKDC;PRKN;PRNP;RABGEF1;SLIT2;SMAD3;STK39;TARDBP;TGFB1;TRAF3IP1	30	13536	32	18107	0.00615365	0.349239
GO:0005776	autophagosome	cellular_component	10	ATG14;ATG5;ATG9A;C11H9orf72;C12H6orf106;CALCOCO2;CLN3;HTT;MAP1LC3B;ORAI1;OSBPL7;PIP4K2B;RAB23;RAB24;RALB;SQSTM1;SRPX;TBC1D12;TBC1D14;TBC1D25;TBC1D5;TP53INP1;TP53INP2;UBQLN1;UBQLN4;USP33;VTI1A;WASHC1;WIPI2;ZFYVE1	30	13536	33	18107	0.0190276	0.68078
GO:0048812	neuron projection morphogenesis	biological_process	7	ALS2;ANKRD27;CNTNAP1;DAB2IP;DBNL;DCLK1;DTNBP1;EPB41L3;GAS7;GPM6A;KIF20B;LOC487403;MINOS1;LRRK2;MAP1S;MAP4K4;MINK1;LOC111096071;MNX1;NEFL;NTF3;NYAP1;PACSIN1;SGK1;SHTN1;SRGAP2;THBS4;UBB;UGT8;WEE1;ZNF335;ZSWIM6	30	13536	33	18107	0.0190276	0.68078
GO:1901998	toxin transport	biological_process	6	ABCG1;ANTXR2;ARID1A;ATP6V0A1;BBC3;BNIP3;CCT2;CCT3;CCT4;CCT5;CD274;COPB2;COPZ1;DNAJA1;DNAJC17;DNM1;GGA1;HRH2;HSPA5;LOC102155463;LRP6;MTMR12;NRP1;RAB28;RAB43;SCFD1;SLC7A8;TCP1;TRIP4;VPS11	30	13536	33	18107	0.0190276	0.68078
GO:0001558	regulation of cell growth	biological_process	6	CAMK2D;CLSTN3;CREB3;CRIM1;CTGF;CYR61;DDR1;EPB41L3;ESM1;FAM107A;IGFBP2;IGFBP3;IGFBP4;IGFBP5;IGFBP6;IGFBP7;IGFBPL1;KAZALD1;KIF14;LMX1A;LOC479600;MAD2L2;SGK1;SGK3;SOCS2;TSG101;URI1;WFDC1;WISP1;WISP2	30	13536	33	18107	0.0190276	0.68078
GO:0050727	regulation of inflammatory response	biological_process	7	ADAMTS12;ANXA1;BCL6;BIRC2;BRD4;CLCF1;FABP4;GGT1;IL1R1;JAK2;LYN;MCPH1;MGLL;MYD88;NR1D2;PARK7;PIK3AP1;RELA;RICTOR;SBNO2;SCGB1A1;SEMA7A;SETD6;SHPK;SLC7A2;STK39;TBC1D23;TLR4;TNFAIP3;TNIP1	30	13536	34	18107	0.0458709	0.92626
GO:0051898	negative regulation of protein kinase B signaling	biological_process	10	BANK1;CAVIN3;CIB1;DAG1;DDIT3;DLG1;FLCN;GPER1;HYAL2;INPP5K;LEMD2;LMBRD1;LOC100855640;LOC102156469;MAGI2;MTM1;MUL1;PDCD6;PHLPP1;PKHD1;PLEKHA1;PPP2R5C;PTEN;PTPRJ;RACK1;RAPGEF1;SFRP5;SIRT1;SLC9A3R1;TSC2	30	13536	34	18107	0.0458709	0.92626
GO:0045727	positive regulation of translation	biological_process	9	ABCF1;BCL3;CIRBP;CPEB3;EEF2;EIF4A3;ELAVL1;EP300;ERBB2;FAM129A;FAM129C;FXR1;GUF1;HNRNPD;IL6;KRT17;LARP1;LARP4B;MTOR;PAIP1;PRR16;PYM1;RBMS3;RPS27L;SAMD4A;SOX4;TARBP2;THBS1;UPF3A;UPF3B	30	13536	35	18107	0.091997	0.92626
GO:0003712	transcription cofactor activity	molecular_function	5	AIP;ANKRA2;DDX1;EWSR1;HES6;LDB1;LOC491174;LPXN;MEIS2;MSX2;NFKBIZ;NRG1;NSD1;PHF21A;PIR;PTPN14;RFXANK;SS18L2;SUPT20H;TAF13;TFB2M;TFDP2;TRRAP;WDR75;ZMYND11;ZMYND8;ZNF662;ZNF667;ZNF783;ZNF865	30	13536	35	18107	0.091997	0.92626
GO:0016328	lateral plasma membrane	cellular_component	7	ACTN1;ANK3;ANXA1;ARL2;AXIN1;BVES;CDH1;CDK14;CLDN12;CLDN1;CLDN3;CLDN7;CTNNB1;DLG1;DVL1;EPCAM;FIS1;CLDN15;FZD3;GJA1;IQGAP1;IQGAP3;MARK2;MTCL1;MYO1C;NKD2;NSG1;PTPRO;RAB13;SLC26A5;TBCD;VANGL1	30	13536	36	18107	0.159979	0.92626
GO:0005913	cell-cell adherens junction	cellular_component	5	ABI2;AFDN;CADM1;CADM2;CADM3;CADM4;CD200;CDH1;CDH3;CTNNA2;CTNNB1;DLG5;DSC2;FLOT1;FLOT2;JUP;MYH9;NDRG1;NECTIN1;NECTIN2;NECTIN3;PTPRM;PVR;SCRIB;SMAD7;SMAGP;SORBS1;TJP1;VCL;ZYX	30	13536	37	18107	0.248298	0.92626
GO:0009267	cellular response to starvation	biological_process	8	ALB;BMPR2;CADPS2;CAV1;DNAJC15;DSC2;FBXO22;FNIP1;FOXA3;FOXO1;GAS2L1;GAS6;GBA;INHBB;KIAA1324;KLF10;LOC481228;LRRK2;NUPR2;PDK4;RALB;RRAGA;RRAGB;RRAGC;RRAGD;SFRP1;SIRT1;SREBF1;USP33;WNT4	30	13536	37	18107	0.248298	0.92626
GO:0006413	translational initiation	biological_process	8	ABCF1;EIF1AD;EIF1AX;EIF1B;EIF1;EIF2AK2;SULT6B1;EIF2A;EIF2B1;EIF2B2;EIF2B3;EIF2B4;EIF2B5;EIF2S2;EIF3F;EIF4A1;SENP3;EIF4A2;EIF4E2;EIF4E3;EIF4E;EIF5B;EIF5;LARP1;LOC100856673;LOC479795;LOC611215;MTFMT;PAIP1;RPL10;RPL21;YAE1D1	30	13536	38	18107	0.351468	0.92626
GO:0021987	cerebral cortex development	biological_process	13	AFDN;ASPM;BAX;BBS1;BBS2;BBS4;CDH2;CDON;CEP120;CNTNAP2;COL3A1;FAT4;FOXP2;HIF1A;KIF14;LOC111094296;LRP6;MCPH1;MKKS;LOC102153017;NDE1;NF1;NTRK2;PTPRS;TACC1;TACC2;TACC3;TRAPPC9;TSC1;WDR62;YWHAE	30	13536	38	18107	0.351468	0.92626
GO:0001570	vasculogenesis	biological_process	7	ACKR3;AMOT;CAV1;CCM2;CITED2;FOXF1;FZD4;GLMN;HAS2;HDAC7;LOC106557909;HEG1;HHEX;JUNB;MYO1E;NTRK2;PAXIP1;PITX2;PTK2;RAMP2;RASIP1;SGPL1;TGFBR2;TIPARP;TMEM100;TNNI3;WARS2;YAP1;ZFP36L1;ZFPM2;ZMIZ1	30	13536	39	18107	0.461473	0.92626
GO:0031338	regulation of vesicle fusion	biological_process	7	EVI5L;EVI5;GRTP1;LOC102152829;LOC480654;PLA1A;ADPRH;RABGAP1;GPR21;RABGAP1L;RUNDC1;SGSM1;TBC1D10A;TBC1D10B;TBC1D12;TBC1D13;TBC1D14;TBC1D15;TBC1D16;TBC1D1;TBC1D22A;TBC1D22B;TBC1D25;TBC1D2B;TBC1D2;TBC1D30;TBC1D4;TBC1D5;TBC1D8;TBC1D9B;TBCK;USP6NL	30	13536	44	18107	0.879104	0.99779
GO:0042632	cholesterol homeostasis	biological_process	9	ABCA1;ABCA2;ABCG1;ALMS1;ANGPTL3;APOA1;APOB;APOE;CAV1;DGAT2;EHD1;EPHX2;LAMTOR1;LCAT;LDLRAP1;LIPG;LRP5;MYLIP;NPC1;NPC2;NR1H2;NR1H3;NR5A2;NUS1;PLSCR3;SCARB1;SIRT1;SLC37A4;SOAT1;TMEM97	30	13536	44	18107	0.879104	0.99779
GO:0007204	positive regulation of cytosolic calcium ion concentration	biological_process	12	ABL1;ABL2;ADCY5;ADRA1A;BCAP31;C1QTNF1;C3AR1;CACNA1A;CACNA1C;CCKBR;CCR1;CD36;CD55;CHRNA10;NUP98;CIB2;DLG4;F2RL1;F2R;FIS1;CLDN15;GALR1;GLP1R;GNA15;GPER1;HMGB1;KNG1;NMUR2;NPTN;LOC111093395;NPY2R;SELENOT;SWAP70	30	13536	44	18107	0.879104	0.99779
GO:0001501	skeletal system development	biological_process	7	ACP2;CHRD;COL1A2;COL5A2;FBN1;FGFRL1;GDF11;GJA5;GNAQ;HAPLN1;HAPLN3;HAPLN4;HDAC4;HEXA;HEXB;HOXA10;HOXC10;HSPB11;JAG2;MMP9;NPR3;RASSF2;SOX4;TBX3;USP1;VCAN;VDR;WDR5B;WDR5;WFIKKN2	30	13536	45	18107	0.919205	0.99779
GO:0098655	cation transmembrane transport	biological_process	7	ANO10;ANO1;ATP13A1;ATP13A2;ATP13A3;CALHM2;CALHM6;CHRNA10;NUP98;CHRNA4;CHRNA5;CHRNA7;CHRNB1;CHRNB2;CHRNB4;GAR1;NALCN;P2RX1;P2RX2;P2RX4;P2RX5;ITGAE;SLC30A9;SLC41A1;SLC41A2;SLC41A3;TMEM38A;TMEM38B;TMEM63C;TRPM3;TRPM4;TRPM6	30	13536	55	18107	0.999668	1
GO:0045359	positive regulation of interferon-beta biosynthetic process	biological_process	9	FAM227A;LOC102151615;LOC102151812;LOC102153553;LOC102154270;LOC102154664;LOC102155568;LOC102156502;LOC102156665;LOC102157331;LOC106558034;LOC106558374;LOC106558823;LOC106559437;LOC111090201;LOC111090312;LOC111091236;LOC111092180;LOC111092398;LOC111093339;LOC111096242;LOC111097161;LOC111097271;TBK1;TICAM1;TLR3;TLR4;TLR7;TLR8;TWF2;TLR9	30	13536	112	18107	1	1
GO:0006367	transcription initiation from RNA polymerase II promoter	biological_process	10	ERCC2;ERCC3;GTF2A1;GTF2E1;GTF2E2;GTF2F1;GTF2H3;MAZ;MED12;MED14;MED15;MED17;MED1;MED20;MED24;MED26;MED30;POLR2D;POLR2G;RARB;RORA;TAF10;TAF12;TAF4;TAF5;TAF6;TCF4;THRAP3;YAP1	29	13536	29	18107	0.000214971	0.0373452
GO:0034446	substrate adhesion-dependent cell spreading	biological_process	9	ABL1;ANTXR1;BVES;EFNA1;EPHA1;EPHB3;FERMT2;FERMT3;FER;FN1;FZD4;FZD7;ILK;ITGA8;ITGAV;ITGB7;KIF14;LAMA5;LAMB1;LAMC1;LOC102156677;LOC102156915;LOC479761;RAB1A;RAC1;SRCIN1;SRC;TEK;VAMP3	29	13536	30	18107	0.00179127	0.157783
GO:0000910	cytokinesis	biological_process	7	ARL3;BCL2L1;BIRC5;BRCA2;CIT;DCTN3;ECT2;INCENP;IST1;KIF13A;KLHL13;KLHL9;LOC100688660;LOC102155336;MAP9;MYH9;PIK3C3;PRC1;RAB11A;RAB11FIP3;RAB11FIP4;RAB35;RALA;RALB;RHOB;RHOC;ROCK2;STAG2;ZFYVE26	29	13536	31	18107	0.00776876	0.403202
GO:0031397	negative regulation of protein ubiquitination	biological_process	12	ARRB1;ATG5;BAG5;CAV1;CDK5;CHP1;CRY1;MTERF2;DNAJA1;GCLC;GLMN;GNL3L;GTPBP4;ISG15;KLHL40;N4BP1;NXN;OGT;PRKCE;PRMT3;RPS3;SENP2;SMAD7;SOX4;SPOPL;TNFAIP3;TSPO;UBXN1;UFL1;USP4	29	13536	31	18107	0.00776876	0.403202
GO:0097110	scaffold protein binding	molecular_function	5	CACNA1G;CACNA1H;CASP8;CAV2;CHUK;CIT;CRIPT;DLG4;DLL1;DSP;GJA1;GRID2;IKBKB;KCNA5;KCNQ1;KRT5;LOC474898;MAP2K2;MAP3K7;NCK2;NLGN3;NOS3;PARK7;PDE4D;PHF6;SHANK3;SRC;TREM1;VIM	29	13536	32	18107	0.0233815	0.734813
GO:0032040	small-subunit processome	cellular_component	9	DCAF13;DIEXF;EMG1;FCF1;HEATR1;IMP3;LOC475405;LOC489134;MPHOSPH10;NGDN;NOC4L;NOL6;NOP14;NOP56;NOP58;PDCD11;PWP2;RPS7;SNU13;TBL3;UTP11;UTP14A;UTP18;UTP20;UTP23;UTP3;UTP6;WDR36;WDR3	29	13536	32	18107	0.0233815	0.734813
GO:0017112	Rab guanyl-nucleotide exchange factor activity	molecular_function	5	ALS2;DENND1A;DENND1B;DENND1C;DENND2A;DENND2C;DENND2D;DENND3;DENND4A;DENND4B;DENND4C;DENND6A;MADD;PLXNB2;DENND6B;RAB3GAP1;RAB3GAP2;RAB3IL1;RAB3IP;RABGEF1;RGP1;RIC1;RIN3;SBF1;SBF2;ST5;TRAPPC11;TRAPPC13;TRAPPC1;TRAPPC4	29	13536	32	18107	0.0233815	0.734813
GO:0005747	mitochondrial respiratory chain complex I	cellular_component	15	FOXRED1;NDUFA10;NDUFA11;NDUFA12;NDUFA1;NDUFA2;NDUFA3;NDUFA4;NDUFA6;NDUFA8;NDUFA9;NDUFB10;NDUFB11;NDUFB2;NDUFB3;NDUFB4;NDUFB5;NDUFB8;NDUFB9;NDUFC1;NDUFS1;NDUFS2;NDUFS3;NDUFS4;NDUFS6;NDUFS7;NDUFV1;NDUFV2;NDUFV3	29	13536	33	18107	0.0549472	0.92626
GO:0032869	cellular response to insulin stimulus	biological_process	9	C2CD5;CAPN10;CDK2;CPEB1;CPEB2;DENND4C;ENPP1;GHRHR;GOT1;HDAC9;INHBB;INPP5K;KAT2B;PDPK1;PPARG;PRKCI;PRKDC;RAB10;RAB13;RAB31;RAB8A;RPS6KB1;SLC25A33;SLC2A4;SORBS1;TBC1D4;USF1;VAMP2;WDTC1	29	13536	33	18107	0.0549472	0.92626
GO:0007173	epidermal growth factor receptor signaling pathway	biological_process	11	ABL1;ADAM17;CAMLG;EFEMP1;EGFR;EGF;EREG;FAM83B;FER;FES;GAB1;GAREM1;HBEGF;IQGAP1;KIF16B;KRAS;PDPK1;PIGR;PLCG1;PTK2B;PTK2;PTPN11;SHC1;SOCS5;SOS1;SOX9;SRC;TGFB1;VIL1	29	13536	34	18107	0.10759	0.92626
GO:0005840	ribosome	cellular_component	9	HSPA14;LOC102151445;LOC102155800;MRPL10;MRPL12;MRPL13;MRPL14;MRPL18;MRPL24;MRPL33;MRPL34;MRPL35;MRPL36;MRPL37;MRPL53;MRPL9;MRPS18B;MRPS23;MRPS30;NCK1;NLE1;PRMT3;RPL36AL;RPL36A;RPL3;RPS24;RPS27A;SLC25A10;TRNP1	29	13536	34	18107	0.10759	0.92626
GO:0051216	cartilage development	biological_process	8	BBS1;BBS2;CD44;CSGALNACT1;DLX2;EDN1;FBXW4;HIF1A;HOXA3;HOXB3;HOXC4;HOXC6;HOXD3;HYAL1;HYAL2;HYAL3;IFRD2;ITGB8;MGP;MKKS;LOC102153017;PITX1;PRRX1;SATB2;SMAD1;SMAD5;SMAD9;SOX6;SULF1;ZBTB16;ZEB1	29	13536	34	18107	0.10759	0.92626
GO:0031982	vesicle	cellular_component	4	A3GALT2;AKT1;ALS2;ANO5;ARHGEF2;CASK;DPP7;DYNC1I1;DYNC1I2;GAK;GIPC3;KCNE3;KIF9;LGR6;NOD2;NRXN1;PACRG;RAB39B;RABGEF1;RIPK2;SLC34A3;SNAP25;SPNS1;SPNS2;STX10;STX5;SYBU;VAPA;WDFY2	29	13536	35	18107	0.182955	0.92626
GO:0042060	wound healing	biological_process	6	ALOX15;AQP1;ARHGEF19;C12H6orf89;CCM2L;CELSR1;COL3A1;CORO1B;DCBLD2;ELK3;EPB41L4B;ERBB2;EREG;FGFR1OP2;FN1;FNTB;LOC102151415;LOC111094296;MACF1;NF1;NRG1;PAK1;PDGFRA;PPARA;PPARD;SCRIB;SDC1;SDC4;SLC11A1	29	13536	35	18107	0.182955	0.92626
GO:0031647	regulation of protein stability	biological_process	9	APTX;ASPH;AURKA;CCAR2;CD81;CDKN2AIP;DACT1;DPM3;FBXO7;GIPC1;GNL3L;HDAC3;HDAC6;KAT2A;KRAS;LRRC46;NF2;PRKD1;PSMD8;QRSL1;RNF128;SREBF1;STUB1;TADA2A;TADA3;TOMM7;USP3;USP4;VPS35	29	13536	37	18107	0.386322	0.92626
GO:0038083	peptidyl-tyrosine autophosphorylation	biological_process	10	ABL1;ABL2;BMX;BTK;CSK;DDR1;FER;FES;FGR;FRK;FYN;HCK;IGF1R;INSR;ITK;JAK1;JAK2;JAK3;LYN;PTK2B;PTK2;ROS1;SRC;SYK;TEC;TNK1;TNK2;TYK2;ZAP70	29	13536	37	18107	0.386322	0.92626
GO:0035690	cellular response to drug	biological_process	6	ACER2;ANKRD1;ASIC2;BRAF;DPEP1;EIF2B5;EP300;FBP1;GAS6;GPLD1;HTR1B;KCNQ1;MEF2C;NFE2L2;NKX3-1;NOS2;PDE2A;PDE4A;PDE4B;PPM1F;PPP1R14A;PPP3CA;PPP3CB;PRNP;RAP2A;RBM22;REST;TFRC;TP53	29	13536	37	18107	0.386322	0.92626
GO:0008542	visual learning	biological_process	8	APP;ATP1A3;BRAF;CDK5;CHRNB2;CTNS;DRD1;HIF1A;HMGCR;HRH1;HRH2;IFT20;ITGB1;KMT2A;KRAS;LOC111092089;LOC488636;LRRN4;MECP2;MEIS2;NDRG4;NF1;NLGN3;NPTN;LOC111093395;PDE1B;PIAS1;PPP1R1B;RIC8A;TANC1	29	13536	38	18107	0.498628	0.92626
GO:0006879	cellular iron ion homeostasis	biological_process	11	ABCB6;ABCB7;ACO1;BMP6;CP;FTH1;FTL;FXN;HEPH;HFE;HIF1A;HMOX1;IREB2;ISCU;LOC102155200;LOC111098020;LOC477072;LOC481426;LOC608550;LOC611632;NDFIP1;NUBP1;SCARA5;SLC11A1;SLC40A1;SMAD4;SOD1;TFRC;TTC7A	29	13536	38	18107	0.498628	0.92626
GO:0042102	positive regulation of T cell proliferation	biological_process	8	AIF1;ANXA1;CARD11;CARMIL2;CCL5;CD276;CD40LG;CD6;CD86;CORO1A;DHPS;DNAJA3;EFNB1;HAVCR1;IL15;IL23A;IL6ST;IL6;JAK3;NCK1;NCK2;NCKAP1L;PDCD1LG2;PNP;SASH3;SPN;TNFRSF13C;TRAF6;VCAM1	29	13536	38	18107	0.498628	0.92626
GO:0016459	myosin complex	cellular_component	11	CCDC102A;CGNL1;CGN;DYNLL2;LOC607207;MYL12B;LOC608648;MYH11;MYH14;MYH1;MYH7B;MYL6;MYO10;MYO15B;MYO16;MYO18A;MYO19;MYO1B;MYO1D;MYO1E;MYO1F;MYO3A;MYO5A;MYO5B;MYO5C;MYO6;MYO7A;MYO7B;MYO9A;MYO9B	29	13536	42	18107	0.84851	0.979617
GO:1902600	proton transmembrane transport	biological_process	9	COX4I1;COX5A;COX5B;COX7A1;COX7A2L;LOC100684983;LOC102155410;LOC477792;LOC477944;LOC489515;LOC606860;LOC609990;LOC612644;NDUFA4;SLC11A2;SLC36A1;SLC46A1;SLC9A1;SLC9A5;SLC9A6;SLC9A7;SLC9A8;SLC9A9;SLC9B1;SLC9B2;TMCO3;UQCR11;UQCRFS1;UQCRH	29	13536	42	18107	0.84851	0.979617
GO:0050839	cell adhesion molecule binding	molecular_function	5	AFDN;CADM1;CADM2;CADM3;CADM4;CD200;CDH1;CPE;CXADR;DSG2;DSP;EZR;ITGB2;ITGB7;MSN;NECTIN1;NECTIN2;NECTIN3;NLGN2;NPTN;LOC111093395;NRXN1;PKP3;POSTN;PTPRD;PVR;SELL;SMAGP;TENM2;TENM3	29	13536	44	18107	0.932731	0.99779
GO:0045165	cell fate commitment	biological_process	7	CASP3;ERBB4;GAP43;GAS1;GATA2;GATA3;GATA4;GATA5;GATA6;KDM6B;LOC102152029;NEUROD1;ONECUT1;ONECUT2;PML;PRDM1;ROR2;SMAD2;SOX12;SPRY2;TGFB1I1;TRPS1;WNT11;WNT2;WNT3;WNT4;WNT5B;WNT7B;WNT9A	29	13536	44	18107	0.932731	0.99779
GO:0006935	chemotaxis	biological_process	5	ACKR2;ACKR3;ACKR4;AMOT;C3AR1;C5AR1;CCR1;CCR5;CMKLR1;CMTM7;CXCL10;CXCL12;CXCR4;DOCK2;ECSCR;ENPP2;FER;FES;HMGB2;LOC102153164;LOC484790;LSP1;LYN;NCKAP1L;PLGRKT;RAC2;ROBO2;S1PR1;XCR1	29	13536	49	18107	0.994715	1
GO:0022627	cytosolic small ribosomal subunit	cellular_component	12	EIF2D;FAU;LOC106559170;LOC476206;MCTS1;MRPS18A;MRPS18C;MRPS5;RPS11;RPS13;RPS16;RPS17;RPS19;RPS20;RPS21;RPS24;RPS25;RPS26;RPS27L;RPS28;RPS29;RPS2;RPS3A;RPS3;RPS4X;RPS5;RPS7;RPS8;SLC25A38;RPSA	29	13536	51	18107	0.998395	1
GO:0035197	siRNA binding	molecular_function	7	AGO2;DICER1;FAM227A;LOC102151615;LOC102151812;LOC102153553;LOC102154270;LOC102154664;LOC102155568;LOC102156502;LOC102156665;LOC102157331;LOC106558034;LOC106558374;LOC106558823;LOC106559437;LOC111090201;LOC111090312;LOC111091236;LOC111092180;LOC111092398;LOC111093339;LOC111096242;LOC111097161;LOC111097271;MECP2;TARBP2;TLR7;TWF2;TLR9	29	13536	111	18107	1	1
GO:0008333	endosome to lysosome transport	biological_process	8	AKTIP;ATG14;CDX2;CHMP5;DENND3;FAM160A2;GPRASP1;HOOK1;HOOK2;HOOK3;KIF13A;LOC478038;LOC111092012;MGRN1;MTM1;RAB7A;RHOB;RILP;SCYL2;SNAPIN;SNX16;SNX27;SORT1;TGFBRAP1;TRAK1;VAMP7;VIPAS39;VPS16;VPS18	28	13536	28	18107	0.000287715	0.0461377
GO:0031648	protein destabilization	biological_process	10	BMP2;BTRC;CCDC88C;CDC73;CHFR;ZNF605;CTSH;DERL1;FBXL3;FBXW11;GSN;LOC102154209;ID1;ISOC2;MUL1;MYLIP;NCLN;PEX2;PLK1;PRKDC;PRKN;RNF139;TRMT12;RNF5;SENP2;SIRT1;SIRT6;SNCA;SRC;TMEM147;TRIM21	28	13536	29	18107	0.00232456	0.180593
GO:0007266	Rho protein signal transduction	biological_process	10	ADGRG1;AGTR1;ARHGAP6;ARHGDIA;ARHGEF11;C30H15orf62;CDC42EP1;CDC42EP2;CDC42EP3;CDC42EP4;CDC42EP5;CDH13;CELSR1;CNKSR1;COL1A2;CTNNAL1;EPS8L1;EPS8L2;GNA12;GNA13;HACD3;RHOG;RHOJ;ROCK1;ROCK2;RTKN;SYNJ2BP;TAX1BP3	28	13536	30	18107	0.00979061	0.468685
GO:0006284	base-excision repair	biological_process	10	APEX1;APEX2;DNA2;ERCC6;FEN1;HMGA1;HMGB1;HUWE1;LIG1;LOC102151348;MPG;MUTYH;NEIL1;NEIL2;NEIL3;OGG1;PARP2;POLQ;RECQL4;RPA1;RPA2;RPA3;SIRT6;SMUG1;USP47;WRN;XPA;XRCC1	28	13536	30	18107	0.00979061	0.468685
GO:0016592	mediator complex	cellular_component	13	CCNC;CDK8;MED10;MED11;MED12;MED13L;MED13;MED14;MED15;MED17;MED18;MED19;MED1;MED20;MED21;MED22;MED24;MED26;MED27;MED28;MED29;MED30;MED6;MED7;MED8;MED9;PPARGC1B;THRAP3	28	13536	31	18107	0.0286612	0.818326
GO:0000381	regulation of alternative mRNA splicing, via spliceosome	biological_process	13	CELF3;CELF4;CELF6;DDX5;DYRK1A;LOC610648;MAGOH;MBNL1;MBNL2;NSRP1;PTBP1;RBFOX2;RBM10;RBM11;RBM15B;RBM25;RBM5;RBM8A;RBMX;SF3A1;SRRM4;SRSF12;SRSF2;SRSF6;THRAP3;TRA2B;UHMK1;WTAP	28	13536	31	18107	0.0286612	0.818326
GO:0007040	lysosome organization	biological_process	6	ABCA1;ACP2;AKTIP;CHMP5;CLN3;CLN8;CLVS1;FAM160A2;GAA;HEXA;HEXB;HOOK1;HOOK2;HOOK3;HPS4;LAMTOR1;LOC100685048;LRRK2;LYST;MBTPS1;MFSD8;MYO7A;NAGLU;TPCN2;TPP1;VPS11;VPS18;ZKSCAN4	28	13536	31	18107	0.0286612	0.818326
GO:0001104	RNA polymerase II transcription cofactor activity	molecular_function	6	MED10;MED11;MED12;MED13L;MED13;MED14;MED15;MED17;MED18;MED19;MED1;MED20;MED21;MED22;MED24;MED26;MED30;MED4;MED7;MED8;MED9;PPARGC1A;PPARGC1B;PPRC1;TDG;THRAP3;TP53BP1;UXT	28	13536	32	18107	0.0656195	0.92626
GO:0045600	positive regulation of fat cell differentiation	biological_process	9	AAMDC;AKT1;ASXL2;BMP2;CARM1;CEBPA;CMKLR1;CREB1;CREBL2;DKKL1;FRZB;KLF5;LMO3;LRP5;MEDAG;NOCT;RARRES2;SAV1;SFRP1;SH3PXD2B;SNAI2;STK3;STK4;WDFY2;WIF1;ZBTB16;ZC3H12A;ZNF385A	28	13536	33	18107	0.125384	0.92626
GO:0030838	positive regulation of actin filament polymerization	biological_process	11	ALOX15;ARF6;BAG4;BAIAP2L1;BAIAP2;C30H15orf62;CCL24;CDC42EP1;CDC42EP2;CDC42EP3;CDC42EP4;CDC42EP5;CTTN;DLG1;EVL;FER;GRB2;KIRREL1;MLST8;MTOR;NCK1;NCK2;NCKAP1L;PFN1;PRKCE;PTK2B;RAC1;RICTOR	28	13536	33	18107	0.125384	0.92626
GO:0071407	cellular response to organic cyclic compound	biological_process	7	ALPL;AXIN1;AXIN2;BMP2;BTRC;CCL2;CCL5;CDKN1B;CEBPA;CYP1A1;FOXF1;GLI2;GSK3A;IL18;P2RY1;PAK2;PAK3;PAK4;RAE1;RGS19;RGS20;RPS6KB1;SMAD1;SMAD5;SMAD9;TGFB1;TIPARP;TMF1	28	13536	33	18107	0.125384	0.92626
GO:0001658	branching involved in ureteric bud morphogenesis	biological_process	8	ADAMTS16;BMP2;BMP4;CTNNB1;DCHS1;DLG1;EYA1;FAT4;GDNF;GPC3;GREM1;GZF1;HOXA11;ILK;LAMA5;LOC102156677;LOC102156915;LOC479600;NPNT;PBX1;PGF;PKD2;PTCH1;SIX1;SMAD4;SOX9;TCF21;WNT4	28	13536	33	18107	0.125384	0.92626
GO:0007416	synapse assembly	biological_process	6	ADGRL3;BDNF;BSN;CACNA1A;CDK5;CEL;CLSTN3;DBNL;DSCAM;FLRT3;GNPAT;GPHN;LOC106557821;LOC111090913;LOC487172;LOC100855970;LOC487173;MECP2;NLGN2;NLGN3;NLGN4X;NRG1;NRXN1;PCLO;PLXND1;SDK2;SHANK2;SHANK3;SLITRK6	28	13536	34	18107	0.208424	0.92626
GO:0034613	cellular protein localization	biological_process	6	AJUBA;AMOT;AP1AR;ARMCX3;AXIN2;CD63;CRACR2B;CSNK1E;CTNNA1;DISC1;DMD;DVL2;EYA1;FRMD6;GAS8;GRID2;LAMTOR1;LAMTOR2;LAMTOR3;LATS2;LOC111097407;LRRK2;PRPF19;RRAGB;SPTBN4;TMEM33;TP53;ZDHHC18	28	13536	34	18107	0.208424	0.92626
GO:0000184	nuclear-transcribed mRNA catabolic process, nonsense-mediated decay	biological_process	11	CTIF;EIF3E;EIF4A3;ETF1;EXOSC10;LOC100684639;LOC100856673;LOC102152493;LOC102155331;MAGOHB;MAGOH;NCBP1;NCBP2;PABPC1;PARN;PNRC2;PYM1;RBM8A;RPL10;RPL21;SMG1;SMG6;SMG8;SMG9;UHMK1;UPF1;UPF2;UPF3B	28	13536	35	18107	0.310302	0.92626
GO:0045599	negative regulation of fat cell differentiation	biological_process	9	ARNTL;ASXL1;AXIN1;BBS12;CCDC85B;DDIT3;E2F1;ENPP1;FOXO1;GATA3;GPER1;INSIG1;JAG1;LOC102157036;LOC491503;MMP11;MSX2;RORA;SIRT1;SIRT2;SMAD3;SOD2;SORT1;TGFB1I1;TGFB1;WWTR1;ZFPM1;ZFPM2	28	13536	35	18107	0.310302	0.92626
GO:0006816	calcium ion transport	biological_process	9	ANXA6;CACNA1G;CACNA2D2;CALCRL;CAMK2A;CAMK2D;CAMK2G;CATSPER3;CAV1;CCL5;CCL8;CCR1;CHRNA4;CHRNB2;CORO1A;KCNN4;NALCN;NMUR2;PLN;PPP3CA;PRKCB;PSEN2;RAMP1;RAMP2;SELENOK;SLC8A1;SRI;VDR	28	13536	37	18107	0.536556	0.92626
GO:0010862	positive regulation of pathway-restricted SMAD protein phosphorylation	biological_process	10	ACVR1;ACVR2A;ACVRL1;BMP1;BMP2;BMP3;BMP4;BMP6;BMP7;BMPR1A;BMPR2;C37H2orf88;CSNK2B;DAB2;GDF11;GDF15;GDF6;GDF9;HFE;INHBA;INHBB;LOC100855618;LOC607768;RBPMS;SMAD4;TGFB1;TGFB2;TGFB3	28	13536	39	18107	0.735363	0.92626
GO:0034504	protein localization to nucleus	biological_process	8	ABCA7;BANP;BMP4;BMP7;CALR;CNEP1R1;COL1A1;CTDNEP1;DNAJB6;DVL1;HHEX;LOC100684448;LOC102151313;LOC102157048;LOC111092487;MSX1;PAF1;PIKFYVE;PLRG1;PYGO1;RPL11;SIX1;SIX4;SOX9;SYNE2;TOR1AIP1;TOR1A;XPO1	28	13536	39	18107	0.735363	0.92626
GO:0006869	lipid transport	biological_process	5	ABCA1;ABCA3;ABCA5;ABCA7;ABCA8;ABCA9;APOBR;APOL5;APOL6;APOLD1;GULP1;LOC102156332;LOC111096476;LRP10;OSBP2;C26H5orf52;OSBPL10;OSBPL11;OSBPL1A;OSBPL2;ADRM1;OSBPL3;OSBPL6;OSBPL7;OSBPL8;OSBPL9;PLEKHA8;PLIN4;SPNS1;SPNS2	28	13536	41	18107	0.870298	0.99779
GO:0030593	neutrophil chemotaxis	biological_process	7	C5AR1;CCL17;CCL20;CCL23;CCL24;CCL25;CCL7;CCL8;CSF3R;CTDSPL;ITGA9;CX3CL1;CXADR;CXCL8;FCER1G;ITGA1;ITGB2;LGALS3;LOC480601;LOC480603;NCKAP1L;PDE4B;PDE4D;S100A9;SLC37A4;SYK;TREM1;VAV1;VAV3	28	13536	41	18107	0.870298	0.99779
GO:0032009	early phagosome	cellular_component	13	FAM227A;LOC102151615;LOC102151812;LOC102153553;LOC102154270;LOC102154664;LOC102155568;LOC102156502;LOC102156665;LOC102157331;LOC106558034;LOC106558374;LOC106558823;LOC106559437;LOC111090201;LOC111090312;LOC111091236;LOC111092180;LOC111092398;LOC111093339;LOC111096242;LOC111097161;LOC111097271;SNX3;SYK;SYT7;TLR7;TWF2;TLR9	28	13536	110	18107	1	1
GO:0007093	mitotic cell cycle checkpoint	biological_process	10	BCL2L1;CDKN2B;CHFR;ZNF605;DLG1;HRAS;INTS3;SLC27A3;KNTC1;LOC102151191;LOC102153058;LOC102153836;LOC102154125;LOC106557691;LOC106560206;CCDC34;LOC111095260;LOC111096315;LOC111096743;LOC111098412;MAD2L1BP;NABP1;NABP2;SLC39A5;PLK2;PRCC;RAD17;SMC1A;TGFB1;TTK;ZWILCH;ZWINT	28	13536	102	18107	1	1
GO:0006406	mRNA export from nucleus	biological_process	7	ALKBH5;CHTOP;DDX19A;DDX19B;DDX25;DDX39A;DDX39B;FIP1L1;FYTTD1;GLE1;HNRNPA2B1;NCBP1;NUP107;NUP133;NUP155;NUP160;NUP214;NUP85;NUP88;NXF1;RBMX2;SARNP;SEH1L;SEM1;THOC3;THOC7;U2AF2	27	13536	28	18107	0.00301361	0.217747
GO:1903506	regulation of nucleic acid-templated transcription	biological_process	10	ACTN1;ACTN2;ACTN4;AIP;ARL2BP;BIRC2;DDX1;ECD;FUS;GTF2A1;LOC106558660;LOC475708;LOC491346;LOC608766;LPXN;MAK;PIR;PSMC3IP;PTPN14;RAP2C;RBPMS;SRA1;SUPT7L;TADA1;TAF11;TDRD3;TRRAP	27	13536	28	18107	0.00301361	0.217747
GO:0030501	positive regulation of bone mineralization	biological_process	8	ACVR1;ACVR2A;ACVR2B;ANO6;BMP2;BMP4;BMP6;BMP7;BMPR1A;BMPR2;CAD;ATRAID;CD276;FAM20C;FBN2;GPM6B;KL;LOC102151415;MEF2C;OSR1;OSR2;P2RX7;SLC8A1;TFAP2A;TGFB1;TGFB3;TMEM119;WNT4	27	13536	28	18107	0.00301361	0.217747
GO:0017147	Wnt-protein binding	molecular_function	5	APCDD1;CTHRC1;FRZB;FZD10;FZD1;FZD2;FZD3;FZD4;FZD5;FZD6;FZD7;FZD9;LRP5;LRP6;PGM1;ROR1;PORCN;PTPRO;ROR2;RYK;SFRP1;SFRP2;SFRP4;SFRP5;SMO;TRABD2A;TRABD2B;WLS	27	13536	28	18107	0.00301361	0.217747
GO:0030900	forebrain development	biological_process	10	ALDH1A2;APP;ARID1A;ATRX;CCKAR;CHRD;DCLK1;DKK1;E2F1;FRS2;HTRA2;LOC106559890;LOC111095863;LRP2;MAPK8IP3;MSX1;NDST1;NFIB;NOTCH1;NOTCH3;NR2F2;PCDH9;PRKG1;SETD2;SRC;TOP2B;TWSG1	27	13536	29	18107	0.0123158	0.529509
GO:0030522	intracellular receptor signaling pathway	biological_process	7	AHR;BRD8;GLMP;HNF4A;HNF4G;MAATS1;NR1I2;NCOA1;NCOA2;NR1H2;NR1H3;NR1H4;NR2F1;NR2F2;NR2F6;NR4A1;NR4A2;NR4A3;NR5A2;NR6A1;PPARA;PPARD;RORA;RORB;RORC;RXRB;STAT3;THRB	27	13536	29	18107	0.0123158	0.529509
GO:0018107	peptidyl-threonine phosphorylation	biological_process	9	ACVR1B;ACVR1;AKT1;CAMK2D;CAMK2G;CDK1;CDK5R1;CDK5;CLK1;DAPK2;DCLK1;DYRK1A;GRK2;HIPK2;HIPK3;MAP3K10;MAP3K12;MAPK1;MAPK8;MTOR;NLK;OXSR1;PDPK1;PRKACA;STK39;TGFBR2;TNKS	27	13536	29	18107	0.0123158	0.529509
GO:0000462	maturation of SSU-rRNA from tricistronic rRNA transcript (SSU-rRNA, 5.8S rRNA, LSU-rRNA	biological_process	13	BMS1;BYSL;DCAF13;DIEXF;EMG1;FCF1;HEATR1;LOC475405;LOC610048;MRPS11;MRPS9;NGDN;NOC4L;PWP2;RPS16;RPS24;RPS8;RRP36;TBL3;TSR1;TSR2;UTP18;UTP20;UTP23;UTP3;UTP6;WDR3	27	13536	30	18107	0.0350422	0.910319
GO:0045335	phagocytic vesicle	cellular_component	12	ABCA1;AMBRA1;ANXA11;ATG14;CLCN3;CORO1A;EVL;FMNL1;PIK3C3;RAB11A;RAB11B;RAB14;RAB20;RAB22A;RAB23;RAB31;RAB32;RAB38;RAB43;RAB7A;RAB7B;RAB8A;RAB8B;RAB9A;TCEANC;SRGAP2;STX6;UVRAG	27	13536	30	18107	0.0350422	0.910319
GO:0010811	positive regulation of cell-substrate adhesion	biological_process	6	ABI3BP;AGR2;ALOX15;ARL2;CCDC80;COL26A1;COL8A1;CYR61;ECM2;EDIL3;EGFLAM;EMILIN1;FOXF1;HACD1;HSD17B12;JAK2;NID1;NPNT;NPY2R;PPM1F;PRKCE;RELL2;RSU1;SMOC1;SMOC2;SPOCK2;VTN	27	13536	30	18107	0.0350422	0.910319
GO:0034599	cellular response to oxidative stress	biological_process	6	ATP2A2;DHRS2;ETV5;FOXO3;G6PD;LOC474798;LOC611922;LOC611915;LONP1;LRRK2;NFE2L1;NFE2L2;NR4A2;PNPT1;PPARGC1A;PRKD1;PYCR1;RAD52;RBM11;RHOA;GPX1;SELENON;SELENOS;SIRT2;SLC11A2;SNCA;TMEM161A;TXN2;TXNL1	27	13536	30	18107	0.0350422	0.910319
GO:0072686	mitotic spindle	cellular_component	10	AGBL5;TRNAA-AGC;AURKA;CAPG;CDC14A;CDC42;CDK1;CLASP2;DIAPH1;DYNLL1;EML2;ESPL1;GEM;IKBKG;KAT2A;KIF22;KLHL22;KNSTRN;MAD1L1;MAK;PKD2;PKHD1;PKP4;RPS3;SIRT2;SPAG5;TADA2A;TADA3	27	13536	30	18107	0.0350422	0.910319
GO:0008092	cytoskeletal protein binding	molecular_function	5	ALDOB;ALDOC;ANXA2;B4GALT1;DES;DLG1;DLG5;DST;EPB41L1;EPB41L4A;EPB41L4B;EPB41L5;FABP3;FARP1;FARP2;FRMD3;FRMD5;LIN7C;MYLIP;NEBL;PACSIN1;PACSIN2;PACSIN3;LOC111090846;PDLIM3;PTPN3;PTPN4;TOR1AIP1	27	13536	31	18107	0.078114	0.92626
GO:0070534	protein K63-linked ubiquitination	biological_process	12	ITCH;LOC607889;LOC608680;LOC609108;MAGEL2;PRKN;PRPF19;RNF115;RNF126;RNF152;RNF5;RNF8;STUB1;TRAF6;TRIM27;UBE2B;UBE2E2;UBE2E3;UBE2F;UBE2N;UBE2O;UBE2S;UBE2T;UBE2V1;UBE2V2;WWP2;ZFP91;CNTF	27	13536	31	18107	0.078114	0.92626
GO:0045785	positive regulation of cell adhesion	biological_process	5	ADGRG1;ANGPT1;APBB1IP;BAG4;CHRD;CXCL12;CYTH3;DUSP26;EPB41L4B;ERBB2;FLCN;HYAL1;ITGAV;LDB1;LOC111095870;NRG1;PIK3R2;PRKCA;PRKD2;RHOD;STX3;STX4;TFE3;TGM2;TMEM102;VAV1;VAV3	27	13536	31	18107	0.078114	0.92626
GO:0030971	receptor tyrosine kinase binding	molecular_function	6	ANGPT1;ANGPT2;ANGPT4;CPNE3;DNAJA3;DOCK4;ELMO2;FLT3LG;FNTA;GAS6;HYAL2;MYOC;NCK1;PCNA;PLCG1;PTPN11;PTPN14;PTPN1;PTPN2;RACK1;SHC1;SHC2;SHC4;SOCS5;TOB1;TP53;ZPR1	27	13536	31	18107	0.078114	0.92626
GO:0001085	RNA polymerase II transcription factor binding	molecular_function	6	ANKRD1;ATF4;DACT1;DHX9;GATA2;GATA3;GATA4;GATA5;GATA6;GSK3B;HCLS1;KDM1A;KLF4;LOC111091360;MEF2A;MTDH;PITX2;SMAD4;SPEN;SPI1;TAL1;TEAD3;TP53;TRPS1;WWP2;ZFPM1;ZFPM2	27	13536	32	18107	0.145584	0.92626
GO:0032760	positive regulation of tumor necrosis factor production	biological_process	9	ARFGEF2;ARHGEF2;CD14;CD2;CD36;CYBA;FADD;FCER1G;HMGB1;IL23A;ISL1;LBP;LOC102153861;LY96;MAVS;MYD88;NFATC4;NOD1;NOD2;PIK3R1;RIPK1;RIPK2;SASH3;SPON2;TICAM1;TLR3;TWF2;TLR9	27	13536	32	18107	0.145584	0.92626
GO:0001227	transcriptional repressor activity, RNA polymerase II transcription regulatory region sequence-specific DNA binding	molecular_function	6	AEBP1;ASCL3;BCL6B;CDX2;CGGBP1;CHCHD3;CNBP;E2F7;ETV3;FOXO3;HES6;HOXD9;LOC100855749;MNT;MSX1;MSX2;NFKB1;NR2F6;PCGF6;PPARD;PURB;SATB1;ZBTB4;ZC3H8;ZEB1;ZNF280C;ZNF280D	27	13536	35	18107	0.460887	0.92626
GO:0007368	determination of left/right symmetry	biological_process	9	ACVR1;ACVR2A;ACVR2B;ALG5;AP1B1;AXIN1;BICC1;CC2D2A;DAAM2;DISP1;DNAAF3;DNAAF4;CCPG1;DNAH11;DPCD;DRC1;DYNC2LI1;FOXF1;FOXJ1;GAS8;IFT74;LOC111095863;MKS1;PCSK6;PITX2;PSKH1;RTTN;TBC1D32	27	13536	36	18107	0.57495	0.92626
GO:0005902	microvillus	cellular_component	6	ANGPT1;AQP5;ATP6V1A;ATP6V1B2;CLIC4;DCXR;EXOC4;EZR;FMN2;FSCN1;GIF;HYAL2;IQGAP2;LOC608648;LRRK2;MSN;MYO1C;MYO7A;PDGFRA;RAPGEF3;RDX;SLC9A3R1;STARD10;TEK;VCAM1;VIL1;WWOX	27	13536	36	18107	0.57495	0.92626
GO:0007613	memory	biological_process	6	ABCA7;ASIC1;SMARCD1;ATAD1;ATP1A3;CHRNA7;CHRNB2;CREB1;DRD1;EIF4EBP2;EP300;FGF13;HRH1;HRH2;ITGA3;ITGA5;ITGA8;ITPR3;LOC111098223;JPH3;KMT2B;NTAN1;PAIP2;PLK2;PSEN1;RIN1;SHANK3;SLC8A2;SLC8A3	27	13536	38	18107	0.766622	0.943791
GO:0004860	protein kinase inhibitor activity	molecular_function	6	ASPN;CHAD;CHP1;DCN;DNAJC3;DUS2;FLRT2;FLRT3;GMFG;LRRC15;LRRC19;LRRC4B;LRRC4;LRRTM4;NCK1;PODNL1;PODN;LOC106558831;PRKRIP1;RTN4RL1;SH3BP5L;SH3BP5;SOCS2;SOCS4;SOCS5;SOCS6;SOCS7;TRIB2	27	13536	40	18107	0.890197	0.99779
GO:0042475	odontogenesis of dentin-containing tooth	biological_process	10	ACVR2B;ANKRD11;BAX;BCL2L11;BMP2;BMP4;BMP7;BMPR1A;CTNNB1;DLX2;GLI2;HAND2;JAG2;LAMA5;LEF1;LHX8;LOC102151229;LOC102156677;LOC102156915;LOC449531;LRP6;MSX1;NF2;NFIC;PDGFRA;PITX2;TRAF6	27	13536	42	18107	0.955033	1
GO:0045416	positive regulation of interleukin-8 biosynthetic process	biological_process	9	BCL10;FAM227A;LOC102151615;LOC102151812;LOC102153553;LOC102154270;LOC102154664;LOC102155568;LOC102156502;LOC102156665;LOC102157331;LOC106558034;LOC106558374;LOC106558823;LOC106559437;LOC111090201;LOC111090312;LOC111091236;LOC111092180;LOC111092398;LOC111093339;LOC111096242;LOC111097161;LOC111097271;TLR4;TLR7;TLR8	27	13536	111	18107	1	1
GO:0034154	toll-like receptor 7 signaling pathway	biological_process	9	FAM227A;HAVCR1;LOC102151615;LOC102151812;LOC102153553;LOC102154270;LOC102154664;LOC102155568;LOC102156502;LOC102156665;LOC102157331;LOC106558034;LOC106558374;LOC106558823;LOC106559437;LOC111090201;LOC111090312;LOC111091236;LOC111092180;LOC111092398;LOC111093339;LOC111096242;LOC111097161;LOC111097271;PIK3AP1;TLR7;UNC93B1	27	13536	110	18107	1	1
GO:0045356	positive regulation of interferon-alpha biosynthetic process	biological_process	9	FAM227A;LOC102151615;LOC102151812;LOC102153553;LOC102154270;LOC102154664;LOC102155568;LOC102156502;LOC102156665;LOC102157331;LOC106558034;LOC106558374;LOC106558823;LOC106559437;LOC111090201;LOC111090312;LOC111091236;LOC111092180;LOC111092398;LOC111093339;LOC111096242;LOC111097161;LOC111097271;TLR3;TLR7;TLR8;TWF2;TLR9	27	13536	109	18107	1	1
GO:0071902	positive regulation of protein serine/threonine kinase activity	biological_process	12	ACSL1;ALS2;CAB39;CAMK1;CDK5R1;CDK5R2;CIB1;CSF1R;DAB2IP;EZH2;FAM20A;HIGD1A;IQGAP1;LTF;PARP16;PIH1D1;PPP2CA;RALB;RPTOR;SLC27A1;SNCA;SPRY2;SRC;STK11;STRADA;TELO2	26	13536	26	18107	0.000515353	0.0724274
GO:0030032	lamellipodium assembly	biological_process	7	ABLIM1;ABLIM3;AJUBA;ARHGEF4;ARHGEF7;CAPZB;CARMIL1;CCDC88A;CDH13;FGD4;GOLPH3;KIT;NCK1;NCK2;NUP85;PTPRO;RAC1;RHOD;S1PR1;SH2B1;VAV2;VAV3;VCL;WASF2;WASF3;WHAMM	26	13536	27	18107	0.00390276	0.258068
GO:0070491	repressing transcription factor binding	molecular_function	6	ARNTL;CBX5;CTBP1;CTNNB1;DDX20;EIF4E;GMNN;HDAC4;HDAC5;HDAC7;LOC106557909;HDAC9;HHEX;HMGB1;KAT5;LOC102151229;LOC106557595;LOC449531;LOC476317;NFYB;NOC2L;PARK7;PRDM5;RELA;SRI;TCF3;ZNF703	26	13536	27	18107	0.00390276	0.258068
GO:0000422	autophagy of mitochondrion	biological_process	7	ATG12;ATG2B;ATG3;ATG4A;ATG4B;ATG4C;ATG4D;ATG5;ATG7;ATG9A;CISD2;FBXO7;FIS1;CLDN15;FUNDC1;FUNDC2;GABARAPL1;GABARAPL2;MAP1LC3A;MAP1LC3C;PHF23;GABARAP;PINK1;PRKN;WDR45B;WDR45;WIPI1;WIPI2	26	13536	27	18107	0.00390276	0.258068
GO:0061631	ubiquitin conjugating enzyme activity	molecular_function	7	BIRC6;CDC34;UBE2A;UBE2B;UBE2C;UBE2D1;UBE2D2;UBE2D3;UBE2E1;UBE2E2;UBE2E3;UBE2G2;UBE2H;UBE2J1;UBE2J2;UBE2K;UBE2L3;UBE2N;UBE2O;UBE2Q1;UBE2Q2;UBE2QL1;UBE2S;UBE2T;UBE2V2;UBE2Z	26	13536	28	18107	0.0154617	0.60816
GO:0032266	phosphatidylinositol-3-phosphate binding	molecular_function	8	BBS5;DAB2IP;KIF16B;LANCL2;LOC102153142;LOC102156469;LOC610874;PARD3;PLEKHA5;PLEKHF1;SESTD1;SH3PXD2B;SNX13;SNX19;SNX21;SNX27;SNX3;TECPR1;VPS36;WDR45B;WDR45;WIPI1;WIPI2;ZFYVE19;ZFYVE26;ZFYVE28	26	13536	28	18107	0.0154617	0.60816
GO:0006417	regulation of translation	biological_process	8	ACO1;APP;CDC123;CNOT7;CPEB3;CPEB4;DDX25;DDX6;DNAJC1;EIF2A;FOXO3;GAPDH;GCN1;LOC611215;LSM14B;MAGOH;MAPKAPK5;NEURL1;PUM2;PUM3;QKI;RBM4B;RBM8A;S100A9;ZFP36L1;ZNF706	26	13536	28	18107	0.0154617	0.60816
GO:0045859	regulation of protein kinase activity	biological_process	10	ANKRD54;CCNE1;CCNH;CDC37;CDK5RAP1;CKS1B;CKS2;CSNK2B;ELP1;ELP3;FGR;GCN1;HSP90AB1;KIDINS220;LOC102151653;LOC102151886;LOC102156762;MTOR;PRKAB1;PRKAB2;RAC2;SLC9A3R1;SMG8;TRPT1;TSC1;TSPYL2	26	13536	28	18107	0.0154617	0.60816
GO:2001237	negative regulation of extrinsic apoptotic signaling pathway	biological_process	10	ACVR1;BIRC6;CTTN;GCLC;GCLM;HSF4;HTT;IGF1;ITGA6;ITGAV;LGALS3;LMNA;LOC111096734;LOC102153796;NRP1;PELI3;PHIP;PSME3;RB1CC1;RELA;RPS6KB1;SCG2;SGMS1;SH3RF1;SRC;TCF7L2;YAP1	26	13536	28	18107	0.0154617	0.60816
GO:0009898	cytoplasmic side of plasma membrane	cellular_component	6	ASPSCR1;ATP2B1;BIRC2;CD2;CDH1;CHMP4B;DIABLO;DLG1;DSG1;G6PD;GEM;HTRA2;LDLRAP1;MAP2K2;PGM5;PKP4;PTEN;PTPN22;PTPN3;PTPN4;RAB21;RGS2;RNF31;SHROOM4;TRAF3;TRAF6	26	13536	29	18107	0.0427265	0.92626
GO:0043406	positive regulation of MAP kinase activity	biological_process	13	AJUBA;CD40;EGFR;ERBB2;EZH2;FGF18;FGF1;FGFR1;FLT1;HRAS;IRAK1;KITLG;KRAS;LOC480926;NEK10;NOX4;PDCD10;PDE5A;PDGFA;PDGFB;PDGFD;PIK3CG;PIK3R6;PSEN1;TGFB1;TPD52L1	26	13536	29	18107	0.0427265	0.92626
GO:0048565	digestive tract development	biological_process	7	ALX4;CCKBR;CHD8;CLMP;COBL;COL3A1;DCHS1;EP300;FAT4;GATA2;GATA3;GATA4;GATA5;GATA6;HRH2;ITGA6;ITGB4;KIT;LGR4;LOC102153796;LOC111094296;MIXL1;NKX2-2;PDX1;PKD1;TRPS1	26	13536	30	18107	0.0926742	0.92626
GO:0060348	bone development	biological_process	8	AMER1;ANKRD11;ASXL1;BBX;CHAD;DYM;IFT172;MCPH1;MIGA2;MYOC;P3H1;PAPSS2;PLS3;PPIB;PRPSAP2;RARG;SH3PXD2B;SLC38A10;SMAD1;SMAD5;SMAD9;SPARC;SPNS2;SULF1;SULF2;TULP3	26	13536	30	18107	0.0926742	0.92626
GO:0042771	intrinsic apoptotic signaling pathway in response to DNA damage by p53 class mediator	biological_process	10	AEN;BAG6;BBC3;BCL3;BRCA2;CDIP1;CDKN1A;DDIT4;DYRK2;EP300;HIPK1;HIPK2;LOC102152029;LOC102156469;MSH2;NUPR1;PGAP2;PML;PPP2R5C;RPS27L;SIRT1;SNW1;TMEM109;TP53;TP73;USP28	26	13536	30	18107	0.0926742	0.92626
GO:0001046	core promoter sequence-specific DNA binding	molecular_function	10	ARNTL;ATF4;C17H1orf54;CIART;CHD2;CLOCK;CREM;CRY1;MTERF2;ESR1;ESR2;KLF10;KMT2A;MEF2C;MEOX1;NFYA;NR1D1;NR1D2;NR4A3;NRF1;NRIP1;PROX1;RORA;SIRT1;SOX4;SOX9;THRAP3;TOP1	26	13536	30	18107	0.0926742	0.92626
GO:0000049	tRNA binding	molecular_function	7	AARS2;AARSD1;AARS;AIMP1;ALKBH8;ATP5J2;CARS;CTU2;EARS2;EEF1A1;EEFSEC;EIF2A;FARS2;FARSA;IGHMBP2;LOC102155289;METTL1;NSUN2;PTGES3L;SEPSECS;TRMT10A;TRNT1;TYW5;YARS2;YARS;YRDC	26	13536	30	18107	0.0926742	0.92626
GO:0043407	negative regulation of MAP kinase activity	biological_process	13	APOE;BMP4;BMP7;CBLC;CDK5RAP3;DAB2IP;GBA;HMGCR;HYAL2;INPP5K;IRAK3;LYN;MAPK7;NF1;NUP62;IL4I1;PAQR3;PTPN1;PTPN6;PTPRJ;RGS2;SMPD1;SPRY1;SPRY2;SPRY4;STK38;UCHL1	26	13536	30	18107	0.0926742	0.92626
GO:0006914	autophagy	biological_process	6	AMBRA1;ANXA7;ATG13;ATG2A;BECN1;C11H9orf72;CLEC16A;CTSD;FNBP1L;HMGB1;ITGB4;NPC1;NRBF2;S100A9;SESN2;SRPX;TBC1D5;TECPR2;TMEM74;TOLLIP;ULK3;UVRAG;VPS39;VPS51;VTI1A;WDR45	26	13536	30	18107	0.0926742	0.92626
GO:0048536	spleen development	biological_process	6	ABL1;BARX1;BCL2L11;BCL3;CACNB4;CDKN2B;CITED2;CTC1;FADD;FLVCR1;HOXB4;KMT2A;NFKB2;ONECUT1;PBX1;PCID2;PITX2;PKN1;POLB;PPP2R3C;RC3H1;RC3H2;RIPK3;SAMD9L;TCF21;TET2	26	13536	31	18107	0.168387	0.92626
GO:0001942	hair follicle development	biological_process	10	AARS;ACVR1B;ALX4;APCDD1;CD109;CELSR1;DKK1;EGFR;FZD3;FZD6;INHBA;LAMA5;LDB1;LDB2;LGR4;LGR5;LOC102156677;LOC102156915;NSDHL;RELA;SAV1;SOS1;SOX9;TGFB2;TNFRSF19;ZDHHC21	26	13536	32	18107	0.267201	0.92626
GO:0008217	regulation of blood pressure	biological_process	8	ACTA2;ACVRL1;AGTRAP;CACNA1B;CD34;COL1A2;DLL1;EDNRA;EDNRB;ENPEP;ERAP1;ERAP2;GUCY1A3;LNPEP;LOC488636;LRP5;LVRN;NPR3;NPY1R;P2RX4;PPARG;PTGS1;PTGS2;RAMP2;SOD1;STK39	26	13536	33	18107	0.381286	0.92626
GO:0035914	skeletal muscle cell differentiation	biological_process	7	ANKRD1;ANKRD2;ATF3;BCL9L;BCL9;BTG2;CITED2;COPS2;EGR1;EMD;FOS;FOXN2;GTF3C5;HIVEP3;HLF;HMG20B;KLF5;LEMD2;LOC489910;MAFF;MEF2C;MEF2D;NOTCH1;NUPR1;PLAGL1;SAP30	26	13536	34	18107	0.500121	0.92626
GO:0021766	hippocampus development	biological_process	13	BBS1;BBS2;BBS4;CDK5R1;CDK5R2;CDK5;DCLK2;DLX2;EPHA5;EZH2;FGF13;GSK3B;KCNA1;KIF14;MKKS;LOC102153017;NF2;NR4A3;PAFAH1B1;PLXNA3;PTPRS;RELN;SRF;TSC1;UBA6;YWHAE;ZEB2	26	13536	34	18107	0.500121	0.92626
GO:0097190	apoptotic signaling pathway	biological_process	7	ANXA6;APAF1;CAV1;CD3E;DAPK3;DAP;DIDO1;HIP1;LOC100688321;NGFR;P2RX4;PPARD;RELT;SENP1;SGPL1;SPN;TFPT;TICAM1;TM2D1;TNFRSF11A;TNFRSF11B;TNFRSF14;TNFRSF1B;TNFRSF21;TNFRSF25;UACA	26	13536	35	18107	0.613466	0.92626
GO:0008219	cell death	biological_process	5	AXIN1;AXIN2;CACNA1A;EMP1;EMP2;EMP3;FAF1;FBXO18;LOC102152016;LOC102152069;LOC102156128;LOC106557870;LOC111095077;MAP3K11;NDOR1;NUP62;IL4I1;PARP4;PMP22;PNPLA8;PRKD2;RGS19;RGS20;SNCAIP;SUSD6;TGFB2;VAPA	26	13536	37	18107	0.796328	0.972031
GO:0007017	microtubule-based process	biological_process	5	DCTN3;DYNLL2;GTSE1;KIFAP3;LOC100855995;LOC100856405;LOC102152648;LOC102156768;LOC106557476;LOC478701;LOC610636;MAP3K11;NEK10;NEK2;NEK9;TUBA4A;TUBA8;TUBB2B;TUBB3;TUBB4A;TUBB4B;TUBB6;TUBB;TUBD1;TUBE1;VBP1	26	13536	37	18107	0.796328	0.972031
GO:0048468	cell development	biological_process	7	BMP1;BMP2;BMP3;BMP4;BMP6;C37H2orf88;CYB5R4;GATA2;GATA3;GATA4;GATA5;GATA6;GDF11;GDF15;GDF6;GDF9;HSF4;INHBA;INHBB;LOC100855618;LOC607768;PEX5;TGFB2;TGFB3;TRAF6;TRPS1	26	13536	38	18107	0.860691	0.99258
GO:0016042	lipid catabolic process	biological_process	6	CLPS;DDHD2;LIPA;LIPH;LIPJ;LOC486903;LPL;LRCOL1;PAFAH1B1;PAFAH2;PLA2G12A;PLA2G2C;PLA2G5;PLA2G7;PLCB2;PLCB3;PLCB4;PLCD1;PLCD3;PLCD4;PLCE1;PLCH1;PLCL1;PNLIPRP1;PNLIP;PPT1	26	13536	38	18107	0.860691	0.99258
GO:0007157	heterophilic cell-cell adhesion via plasma membrane cell adhesion molecules	biological_process	7	ADGRL1;ALCAM;CADM1;CADM2;CADM3;CADM4;CD164;CD200;CD6;CDH2;CXADR;DCHS1;FAT4;GRID2;ITGA5;NECTIN1;NECTIN2;NECTIN3;PTPRD;PVR;SCARF2;SMAGP;TENM2;TENM3;UMOD;VCAM1	26	13536	39	18107	0.90816	0.99779
GO:0050830	defense response to Gram-positive bacterium	biological_process	8	ACP5;ADAM17;APP;B2M;C5AR1;CD36;CHGA;FGR;HAVCR1;HMGB2;LBP;LOC100687463;LOC484907;LOC488288;MYD88;NOD1;P2RX7;PLA2G1B;REG3A;RIPK2;SEH1L;SSC5D;TBK1;TLR2;TNFRSF14;VIP	26	13536	40	18107	0.941519	0.99779
GO:0042742	defense response to bacterium	biological_process	7	ADAMTS5;ANKRD17;ANXA3;BCL3;COCH;FCER1G;FCGR1A;IRF8;ISG15;LOC102153164;LOC111090369;LOC611538;MAVS;NOD2;NOS2;PLAC8;RAB1A;RBPJ;ROMO1;SPN;STAB1;SYK;TLR1;TLR6;TMF1;TNFRSF1A	26	13536	45	18107	0.996103	1
GO:0001669	acrosomal vesicle	cellular_component	12	AKAP3;ATP6V0A2;CAPZB;CATSPER3;CRCP;CXADR;HEXB;IQUB;KNL1;LOC106558737;LOC106559190;LOC111092171;LRGUK;NCF2;POMT1;RAB3A;RCBTB2;SLIRP;SPESP1;SPINK1;SPINK2;SPINK8;TCP1;TCTEX1D4;TRIM36;TSKS	26	13536	47	18107	0.998898	1
GO:0070098	chemokine-mediated signaling pathway	biological_process	9	ACKR2;ACKR3;ACKR4;CCL17;CCL20;CCL23;CCL24;CCL25;CCL5;CCL7;CCL8;CCR1;CCR5;CX3CL1;CX3CR1;CXCL10;CXCL12;CXCL8;CXCR4;LOC102154078;LOC106557449;LOC480601;LOC480603;LOC484790;PTK2B;XCR1	26	13536	48	18107	0.999433	1
GO:0005179	hormone activity	molecular_function	6	ADM2;ADM5;ADM;CGA;EDN1;GCG;GPHA2;IAPP;IGF1;IGF2;INHBA;INHBB;INS;LEP;METRNL;NPPB;PRLH;PTHLH;PYY;RETNLB;SST;STC1;STC2;UCN3;VGF;VIP	26	13536	53	18107	0.999985	1
GO:0006310	DNA recombination	biological_process	9	EID3;HMGB1;HMGB2;LIG1;LIG3;LOC100685881;LOC102155331;LOC106558526;LOC111098491;MEI4;MND1;NHEJ1;NSMCE2;PIF1;RAD51B;RECQL4;RPAIN;RTEL1;RUVBL1;RUVBL2;SLX1A;SUPV3L1;UCHL5;XRCC4;XRCC5;XRCC6	26	13536	58	18107	1	1
GO:0007032	endosome organization	biological_process	5	AKTIP;ALS2CL;ALS2;ARFGEF2;CHMP2B;DNAJC13;DNM1;EXOC8;FAM109A;FAM109B;FAM160A2;HOOK1;HOOK2;HOOK3;LAMTOR1;LOC102151745;PLEKHF1;SNX10;SNX33;STX6;TMEM127;USP8;VPS11;VPS18;VPS33B	25	13536	25	18107	0.000689705	0.0855084
GO:1903146	regulation of autophagy of mitochondrion	biological_process	8	ACTL6A;ATG7;CSNK2A2;CTSK;CTTN;DNM1L;FBXW7;FZD5;KAT2A;LOC102152873;LOC481228;MAP1LC3B;PARL;PRKN;RPL28;RUVBL1;SLC17A9;SREBF1;U2AF2;USP36;VDAC1;WBP11;WDR75;ZBTB17;ZDHHC8	25	13536	25	18107	0.000689705	0.0855084
GO:0005801	cis-Golgi network	cellular_component	9	ANGEL1;AZIN2;B3GAT3;BCL9;COG3;FKTN;GOLGA5;GOLGB1;GOSR1;HOOK3;IFT20;KDELR1;LIMK2;LOC102156352;MAN2A1;PHTF1;PIK3R1;RAB30;RETREG1;SCFD1;SCYL1;SLC35C2;TMED5;TRIP11;YIPF6	25	13536	25	18107	0.000689705	0.0855084
GO:0048487	beta-tubulin binding	molecular_function	7	ARL8B;B4GALT1;BBS4;BCAS3;CAPZB;CASC1;CCT5;EMD;FGF13;GJA1;HDAC6;HTT;IFT74;LRPPRC;MAP1S;NDEL1;PACRG;PDCD5;RANBP10;SIRT2;SPAST;TBCA;TBCD;TTLL7;VAPB	25	13536	25	18107	0.000689705	0.0855084
GO:0008536	Ran GTPase binding	molecular_function	9	CSE1L;IPO11;IPO13;IPO4;TM9SF1;IPO7;IPO8;KPNB1;LOC474539;NUP50;NUTF2;NXT1;RANBP10;RANBP17;RANBP1;RANBP3;RANBP9;RANGRF;TNPO1;TNPO2;XPO1;XPO4;XPO5;XPO6;XPO7;XPOT	25	13536	26	18107	0.00504852	0.309496
GO:0014704	intercalated disc	cellular_component	6	ANK3;ANKRD23;ATP1B1;ATP2A2;CAMK2D;CAPZB;CTNNA1;CXADR;DES;DLG1;DSC2;DSG2;DSP;FGF13;GJA5;ITGB1;KCNA5;LOC478773;PGM5;PKP2;RANGRF;SCN1B;TJP1;TMEM65;VAMP5	25	13536	26	18107	0.00504852	0.309496
GO:0050918	positive chemotaxis	biological_process	6	ALKBH1;ANGPT1;BMP4;CCL5;CORO1A;CXCL12;FGF7;HGF;HMGB1;LGALS3;LOC102156046;LOC111089962;LOC476879;LOC111090369;MET;NRP1;NTF3;PDGFB;PLXNB3;PTPRJ;SAA1;SCG2;SCRIB;VEGFB;VEGFC;VEGFD	25	13536	26	18107	0.00504852	0.309496
GO:0048701	embryonic cranial skeleton morphogenesis	biological_process	11	ALX3;BMP4;CTNNB1;DLX2;EIF4A3;FGFR2;GRHL2;IRX5;LOC102151229;LOC449531;MMP14;MMP16;PDGFRA;PRRX1;SETD2;SIX1;SIX2;SIX4;SLC39A1;SLC39A3;SMAD2;SMAD3;TBX15;TGFBR2;WDR19;LOC111095293	25	13536	27	18107	0.0193706	0.68078
GO:0010494	cytoplasmic stress granule	cellular_component	10	ATXN2L;ATXN2;CAPRIN1;CIRBP;DDX1;DDX6;G3BP1;GRB7;KHSRP;LARP4B;LOC479011;LOC610648;LSM14A;MBNL1;MCRIP2;OGFOD1;PABPC1;PABPC4;PQBP1;PUM1;PUM2;RC3H1;TIA1;TIAL1;YBX1	25	13536	27	18107	0.0193706	0.68078
GO:0031623	receptor internalization	biological_process	7	ACKR3;CALCRL;CAV1;CD36;CD81;CD9;CNTN2;CXCL8;DNM2;EZR;FCER1G;GRB2;GRIA1;GRK2;GRK3;ITGB1;LDLRAP1;NEDD4;PICALM;RAB31;RAMP1;RAMP2;SNCA;SNX1;SYK	25	13536	27	18107	0.0193706	0.68078
GO:0001657	ureteric bud development	biological_process	7	ARG2;BMP7;BMPER;CRLF1;EPCAM;FGFR1;FOXC2;GDF11;OSR1;RARA;RARB;RET;ROBO2;SFRP1;SIM1;SLIT2;SMAD1;SMAD2;SMAD3;SMAD5;SMAD6;SMAD7;SMAD9;SPRY1;TCF21	25	13536	27	18107	0.0193706	0.68078
GO:0010718	positive regulation of epithelial to mesenchymal transition	biological_process	12	ALX1;AXIN2;BAMBI;BCL9L;BMP2;COL1A1;DAB2;EPB41L5;EZH2;GLIPR2;LEF1;LOC488215;NOTCH1;OLFM1;RGCC;SMAD2;SMAD3;SMAD4;SNAI1;TGFB1I1;TGFB1;TGFB2;TGFB3;WWTR1;ZNF703	25	13536	27	18107	0.0193706	0.68078
GO:0048365	Rac GTPase binding	molecular_function	10	ABI2;ARHGAP4;ARHGEF2;BRK1;CAV1;DOCK4;DVL2;EPS8;FLNA;FMNL1;HACE1;IQGAP1;IQGAP2;MAP3K11;NCF2;NCKAP1;NOXA1;OCRL;PKN1;RALBP1;RCC2;SOD1;SRGAP1;SRGAP2;SRGAP3	25	13536	27	18107	0.0193706	0.68078
GO:0000086	G2/M transition of mitotic cell cycle	biological_process	8	ABCB1;ARPP19;BIRC5;BRSK2;CCNY;CDC25C;CDK14;CLDN12;CDKN1A;CDKN2B;CHEK1;CHEK2;DYNC1I2;FBXL15;FBXL7;FGFR1OP;FOXM1;KAT14;PET117;LATS1;NES;PLK1;PPM1D;SKP2;TAF2;TPD52L1;USH1C	25	13536	27	18107	0.0193706	0.68078
GO:0007265	Ras protein signal transduction	biological_process	9	BRAP;CCNA2;BBS7;CDK2;CDKN1A;CDKN2A;DOK1;HRAS;IQGAP3;KRAS;LOC489534;MAPKAPK2;MAPKAPK5;NF1;PRKD1;RALA;RALB;RASGRP1;RASGRP3;RASSF1;RFXANK;RIT1;RRAS2;RSU1;SHTN1;TP53	25	13536	27	18107	0.0193706	0.68078
GO:0045499	chemorepellent activity	molecular_function	3	APOA1;EFNA5;EPHA7;FLRT2;FLRT3;NRG1;SEMA3A;SEMA3B;SEMA3C;SEMA3D;SEMA3E;SEMA3F;SEMA3G;SEMA4A;SEMA4C;SEMA4D;SEMA4F;SEMA5A;SEMA5B;SEMA6A;SEMA6B;SEMA6C;SEMA6D;SEMA7A;TWNK;SEMA4G	25	13536	27	18107	0.0193706	0.68078
GO:0010506	regulation of autophagy	biological_process	7	ABL2;CISD2;DRAM1;DRAM2;EP300;FBXL2;HMGB1;KAT8;MAPT;MTCL1;NRBF2;PRKN;RB1CC1;RRAGA;RRAGB;RRAGC;RRAGD;SOGA1;SOGA3;TP53INP1;ULK2;USP10;USP13;USP33;VMP1	25	13536	27	18107	0.0193706	0.68078
GO:0018279	protein N-linked glycosylation via asparagine	biological_process	10	DAD1;DDOST;DERL3;FUT8;MGAT2;RPN1;ST3GAL1;ST3GAL2;ST3GAL3;ST3GAL4;ST3GAL5;ST3GAL6;ST6GAL1;ST6GAL2;ST6GALNAC3;ST6GALNAC4;PIP5KL1;ST6GALNAC5;ST6GALNAC6;STT3A;STT3B;SYVN1;TUSC3;UBE2G2;UBE2J1;VCP	25	13536	27	18107	0.0193706	0.68078
GO:0007005	mitochondrion organization	biological_process	5	CAV2;CEBPA;CXADR;DNAJA3;EPAS1;FANCG;FXN;GABPB1;HMGCL;HTRA2;LONP1;MAN2A1;MIEF2;P2RX7;PARK7;PHB2;PHB;PRKN;PTCD2;RAB3A;RHOT1;SELENON;SPG7;TMEM11;YME1L1	25	13536	28	18107	0.0519446	0.92626
GO:0034644	cellular response to UV	biological_process	8	AQP1;AURKB;TRNAD-GUC;BAK1;BAX;CASP9;CDC25A;EP300;ERCC4;FBXW7;KDM1A;MAPK9;N4BP1;NFATC4;NOC2L;PCNA;PIK3R1;POLD1;PTPRK;RHNO1;RUVBL2;TMEM161A;TP53INP1;TP73;USP28;ZBTB1	25	13536	28	18107	0.0519446	0.92626
GO:0048813	dendrite morphogenesis	biological_process	8	CACNA1A;CDK5;CTNNA2;DCLK1;DSCAM;DVL1;ELAVL4;FMN1;HPRT1;ITGB1;KIDINS220;KLF7;MAP2;MAP6;MAPK8IP2;MEF2A;MINK1;LOC111096071;PREX2;RAC1;RBFOX2;RERE;SDC2;SEMA3A;SLC11A2;VLDLR	25	13536	28	18107	0.0519446	0.92626
GO:0097191	extrinsic apoptotic signaling pathway	biological_process	8	ACVR1B;BID;CD70;HIPK1;INHBA;LOC102152029;MLLT11;NDUFA13;P2RX7;PARP2;PDPK1;PML;RIPK1;RNF41;SGPP1;SIVA1;SMAD3;TGFB1;TGFB2;TLR3;TNFRSF12A;TNFRSF1B;TNFSF12;TRADD;WWOX	25	13536	28	18107	0.0519446	0.92626
GO:0030199	collagen fibril organization	biological_process	7	ADAMTS14;ADAMTS2;COL1A1;COL1A2;COL3A1;COL5A1;COL5A2;DDR2;DPT;FMOD;FOXC2;GREM1;LOC102151415;LOC111094296;LOC111094605;LOXL2;LOX;LUM;MMP11;NF1;P4HA1;PLOD3;SERPINH1;TGFB2;TNXB	25	13536	29	18107	0.109558	0.92626
GO:0045184	establishment of protein localization	biological_process	6	ABL1;CARMIL2;CEP55;CHMP1B;CHMP2A;CRIPT;DLG4;DZIP1;FLNA;GPHN;HINFP;ITGA8;KIF14;MCC;NPNT;PHLDB2;PLEKHA1;PLK1;RAP2A;RCC2;SMYD3;WBP2;WDPCP;WHRN;ZDHHC15	25	13536	29	18107	0.109558	0.92626
GO:0010595	positive regulation of endothelial cell migration	biological_process	12	AAMP;ADGRA2;AGT;ANXA3;ATOH8;BCAR1;BCAS3;BMP4;BMPR2;ETS1;FGF2;GATA3;GPLD1;ITGB1BP1;KDR;PDCD6;PRKD1;PROX1;PTK2B;RHOB;ROCK2;SASH1;SPARC;TEK;ZNF580	25	13536	29	18107	0.109558	0.92626
GO:0008630	intrinsic apoptotic signaling pathway in response to DNA damage	biological_process	9	BAD;BAK1;BAX;BCL2A1;BCL2L11;BCL2L1;BCL2L2;CASP9;CHEK2;CRIP1;E2F1;ERCC6;FNIP2;HIC1;HTRA2;IKBKE;MLH1;NFATC4;PIK3R1;POLB;PRKDC;SOD2;TNFRSF1A;TNFRSF1B;XPA	25	13536	29	18107	0.109558	0.92626
GO:0044297	cell body	cellular_component	5	ACTG2;BRAF;CCT2;CCT3;CCT4;CCT5;CXADR;DPYSL3;GFAP;GNAI2;GNAO1;GNAQ;LOC474850;MAPK8IP1;MAPT;NAXE;NF2;NRG1;PACRG;PARK7;RPL28;STAU1;TCP1;TRPV2;USP33	25	13536	30	18107	0.193974	0.92626
GO:0001105	RNA polymerase II transcription coactivator activity	molecular_function	7	ANKRD1;CITED2;HIPK2;HYAL2;ISL1;JADE1;MED12;MEF2A;MKL1;MKL2;MYOCD;NEUROD1;PITX2;PRRX1;PSIP1;RERE;SMARCA2;SMARCA4;SOX12;SOX4;TBX20;TFAP2B;TRIM28;WBP2;WWOX	25	13536	30	18107	0.193974	0.92626
GO:0031072	heat shock protein binding	molecular_function	5	BCOR;CDC37L1;CDC37;DNAJA2;DNAJA3;DNAJA4;DNAJB6;DNAJC7;DNAJC9;MRPS16;EEF1D;FAF1;FKBP4;LOC102155834;FKBP5;LIMK1;LMAN2;LOC100684448;LOC100684696;LOC102151313;LOC474850;METTL21A;METTL23;PACRG;PDXP;PRKN;TOMM34	25	13536	30	18107	0.193974	0.92626
GO:0001102	RNA polymerase II activating transcription factor binding	molecular_function	7	ATF2;BHLHE40;BHLHE41;CITED2;CREB1;CTNNB1;DUSP26;EP300;HIPK2;HNF4A;ISL1;JUN;LDB1;MAD2L2;NCOR1;NEUROD1;NFE2L2;PITX2;SETD3;SMAD3;TAF12;TBX20;TBX3;TP53BP1;ZFPM1	25	13536	31	18107	0.300587	0.92626
GO:0005643	nuclear pore	cellular_component	12	AAAS;EIF5A;ENY2;KPNA1;KPNA2;KPNA3;KPNA4;KPNA6;LOC474539;MAD1L1;MX2;NDC1;NUP160;NUP210;NUP50;NUP58;NUP62CL;NUP88;NUP93;NXT1;PIK3R4;RAE1;SENP2;TMEM33;XPO4	25	13536	31	18107	0.300587	0.92626
GO:0031514	motile cilium	cellular_component	7	ACTL7A;ADCY10;ANXA1;ARL13B;BBS1;BBS2;BBS4;CEP89;FOPNL;FSIP1;GAS8;HIF1A;IFT20;IQUB;KLC3;LOC106559190;LOC111097407;MKKS;LOC102153017;NPHP1;ROPN1L;SCNN1A;SORD;SPAG16;SPEF1;WDR19;LOC111095293	25	13536	32	18107	0.419824	0.92626
GO:0001772	immunological synapse	cellular_component	7	ALCAM;ARHGDIA;BCL10;CARD11;CARMIL2;CD37;CD3E;CD53;CD6;CD81;CORO1A;DLG1;DUSP3;EZR;HAVCR1;ICAM1;LGALS3;MYH9;PDCD6IP;PRKAR1A;PTPRJ;SCIMP;SNX27;SOCS6;STX7	25	13536	32	18107	0.419824	0.92626
GO:0043010	camera-type eye development	biological_process	10	ABI2;B9D1;CC2D2A;CRYBA4;EFEMP1;FBN1;FBN2;FKBP8;FOXC2;FOXP2;GPD2;GRHL2;HSF4;MTERF4;NEUROD1;PITX2;PKNOX1;RAB3GAP1;RARG;RCN1;RXRA;SLC25A25;TMEM231;TWSG1;WDPCP	25	13536	33	18107	0.540255	0.92626
GO:0071300	cellular response to retinoic acid	biological_process	7	ABCA1;ABL2;ALDH1A2;AQP1;BRINP2;CYP26B1;EP300;EPHA3;FZD4;HOXA2;HTRA2;LYN;OGT;OSR1;PTK2B;RARA;RARG;RET;SETX;SNW1;SOX9;TWF2;TLR9;WNT7B;YAP1;YES1	25	13536	33	18107	0.540255	0.92626
GO:0048791	calcium ion-regulated exocytosis of neurotransmitter	biological_process	9	C2CD4A;CACNA1A;DOC2B;LOC611813;RIMS2;RPH3AL;SYT11;SYT12;SYT13;SYT14;SYT16;SYT1;SYT2;SYT3;SYT4;SYT5;SYT6;SYT7;SYT9;SYTL1;SYTL2;SYTL3;SYTL4;SYTL5;TC2N	25	13536	34	18107	0.651737	0.92626
GO:0007612	learning	biological_process	6	AAAS;ARF4;ATAD1;ATP8A1;CNTN2;CNTNAP2;DLG4;DRD1;ELAVL4;EPHB2;FGF13;GMFB;JPH3;JPH4;LOC102152873;NRXN1;NTRK2;PRKAR2B;PRKN;SHANK2;SHANK3;SLC8A2;SLC8A3;UBA6;VDAC1	25	13536	35	18107	0.747415	0.92626
GO:0005581	collagen trimer	cellular_component	3	C1QA;C1QB;C1QC;C1QL1;C1QTNF1;C1QTNF2;C1QTNF3;C1QTNF7;COL11A1;COL15A1;COL18A1;COL24A1;COL26A1;COL6A2;COL6A3;COL8A1;COL8A2;COLEC12;CTHRC1;DLA-DMA;EMILIN1;FAM122B;LOC608697;LOX;SFTPD	25	13536	37	18107	0.882409	0.99779
GO:0001947	heart looping	biological_process	11	ARL13B;C2CD3;CCDC39;CITED2;DLL1;GJA1;HAND2;HIF1A;IFT172;IFT52;IFT57;KIF3A;MEF2C;MIB1;NDRG4;NOTCH1;NPHP3;OVOL2;PKD2;PSEN1;SMAD3;SRF;SUFU;TBX20;TBX3	25	13536	43	18107	0.994761	1
GO:0007218	neuropeptide signaling pathway	biological_process	9	ADCYAP1;CRCP;CYSLTR2;GALR1;GAL;GLRB;GPR1;GPR83;GRP;NMB;NMU;LOC111098622;NMUR2;NPY1R;NPY2R;NTSR1;PENK;PPY;PRLHR;PROKR2;RAPGEF2;SCG5;SORT1;SSTR1;SSTR2;COG1;SSTR3	25	13536	64	18107	1	1
GO:0004879	nuclear receptor activity	molecular_function	6	AHR;GLMP;HNF4A;HNF4G;MAATS1;NR1I2;NR1H2;NR1H3;NR2F1;NR2F2;NR2F6;NR4A1;NR4A2;NR4A3;NR5A2;NR6A1;PPARA;PPARD;PPARG;RARG;RORA;RORB;RORC;RXRB;STAT3	24	13536	24	18107	0.000923027	0.10565
GO:0045296	cadherin binding	molecular_function	6	CDH13;CTNNA1;CTNNA2;CTNNA3;CTNNB1;CTNND1;ERC1;JUP;MACF1;MARK2;MB21D2;MMP24;NDRG1;NUMB;OLFM4;P2RX4;PPME1;PSEN1;PTPRM;TBC1D10A;TBC1D2;UBAP2;UBFD1;VCL	24	13536	24	18107	0.000923027	0.10565
GO:0051539	4 iron, 4 sulfur cluster binding	molecular_function	6	ACO1;ACO2;CDK5RAP1;CDKAL1;ERCC2;ETFDH;ISCA1;ISCA2;ISCU;LIAS;LOC482454;EXO5;MOCS1;MUTYH;NDUFS7;NDUFS8;NDUFV1;NTHL1;NUBP1;NUBP2;NUBPL;PRIM2;RSAD2;RTEL1;SDHB	24	13536	24	18107	0.000923027	0.10565
GO:0071526	semaphorin-plexin signaling pathway	biological_process	8	ARHGDIA;FARP2;MET;NRP2;RAC1;SEMA3A;SEMA3B;SEMA3C;SEMA3D;SEMA3E;SEMA3F;SEMA3G;SEMA4A;SEMA4C;SEMA4D;SEMA4F;SEMA5A;SEMA5B;SEMA6A;SEMA6B;SEMA6C;SEMA6D;SEMA7A;TWNK;SEMA4G	24	13536	24	18107	0.000923027	0.10565
GO:0030672	synaptic vesicle membrane	cellular_component	12	DTNBP1;ICA1;PTPRN2;RAB11B;SCAMP1;SEMA4C;SLC17A7;SLC30A3;STX1A;SVOP;SYN1;SYN2;SYN3;SYNGR1;SYNGR3;SYP;SYT12;SYT1;SYT2;SYT5;SYT7;VAMP2;VTI1A;ZNRF1	24	13536	25	18107	0.00652275	0.36379
GO:0019915	lipid storage	biological_process	6	ABHD4;ABHD5;ANGPTL3;APOA1;B4GALNT1;BSCL2;CAV1;CD36;CIDEA;CRY1;MTERF2;CRY2;DGAT1;DGAT2;FFAR2;FITM2;GM2A;HEXA;HEXB;LDAH;LOC490969;NRIP1;PLIN2;PLIN5;PNPLA2	24	13536	26	18107	0.0242135	0.74966
GO:0030864	cortical actin cytoskeleton	cellular_component	12	CDH1;CDH2;CORO1A;DLC1;DSTN;EEF1A1;FLOT1;FLOT2;LANCL2;LLGL1;LLGL2;LOC102155289;LOC111097376;LOC111098945;MED28;MYZAP;NF2;PLEKHH2;PPP1R9A;PPP1R9B;RAPGEF3;RDX;SHROOM2;SHROOM4	24	13536	26	18107	0.0242135	0.74966
GO:0008180	COP9 signalosome	cellular_component	11	AMOTL1;AMOT;COPS2;COPS3;COPS4;COPS5;COPS6;COPS7A;COPS7B;COPS8;DCAF1;EPB41L2;FLOT1;GPS1;GRB2;HSP90AB1;HSPA5;LOC102156762;LOC474850;MYH9;NCKIPSD;NOD2;PLCG1;TMOD1	24	13536	26	18107	0.0242135	0.74966
GO:0016604	nuclear body	cellular_component	13	ARNTL;CBX4;CELF3;CREB3;CREBRF;GEMIN5;GEMIN6;GEMIN7;GFI1;HIPK2;HR;LSM11;MSANTD1;MTDH;NACC1;NSMCE2;RNF2;SF1;TOLLIP;UBOX5;USP7;ZBTB1;ZFHX3;ZNF496	24	13536	26	18107	0.0242135	0.74966
GO:0031624	ubiquitin conjugating enzyme binding	molecular_function	7	ANKIB1;ARIH1;ARIH2;DCUN1D1;DCUN1D2;DCUN1D3;DCUN1D4;DCUN1D5;MARCH6;PPARA;PRKN;RNF114;RNF125;RNF138;RNF144A;RNF144B;RNF14;RNF166;RNF19A;RNF19B;RNF217;TOLLIP;TRAF6;ZMYM2	24	13536	27	18107	0.0629568	0.92626
GO:0031663	lipopolysaccharide-mediated signaling pathway	biological_process	8	AKT1;CCL2;CCL5;CD14;CD6;IL18;IRAK1;IRAK2;IRF3;LBP;LY96;LYN;MAPK14;MAPK1;MTDH;MYD88;NFKBIA;NOS3;PRKCE;RIPK2;SCARB1;TGFB1;TICAM1;TLR4	24	13536	27	18107	0.0629568	0.92626
GO:0071277	cellular response to calcium ion	biological_process	8	ALOX15;ASPH;BRAF;CAMK2D;CAPN3;CHP2;CLIC4;CPNE1;RBM12;CPNE2;CPNE3;CPNE7;DMTN;ECT2;FOSB;FOS;GPLD1;IQGAP1;JUNB;JUND;JUN;LOC611922;LOC611915;MEF2A;MEF2C;SLC25A23	24	13536	28	18107	0.129031	0.92626
GO:0007623	circadian rhythm	biological_process	4	ARNTL2;ATF5;CLOCK;CREB1;DBP;DYRK1A;EP300;GSK3B;HTR7;ID1;ID3;KLF10;KLF9;NFIL3;NOS2;NTRK1;NTRK2;PROKR1;PROKR2;PROX1;SETX;SREBF1;THRAP3;TIMELESS	24	13536	28	18107	0.129031	0.92626
GO:0009636	response to toxic substance	biological_process	5	AHR;BAX;BLMH;CCL5;CNP;CYP1A1;DDC;DHRS2;EIF2AK2;SULT6B1;ERCC6;GUCY2C;HDAC6;HTR1D;NUPR1;PON3;SCFD1;SCN9A;SLC18A2;SLC30A4;SLC6A4;SLC7A11;TRPM6;WAPL;XPA	24	13536	28	18107	0.129031	0.92626
GO:0030659	cytoplasmic vesicle membrane	cellular_component	11	AHNAK2;AP3S1;APPBP2;C2CD5;ECE2;FMN2;GPER1;HTT;KIF1B;LOC490881;MARCH1;MFSD10;PDE6D;RAB13;SCNN1B;SLC2A4;SNX18;SNX33;SNX9;SPIRE2;TMEM67;VAMP5;VOPP1;ZNRF2	24	13536	29	18107	0.222501	0.92626
GO:0045747	positive regulation of Notch signaling pathway	biological_process	10	AAK1;DLL1;DLL4;EP300;ERH;EYA1;ITGB1BP1;JAG1;JAG2;LFNG;MFNG;NEPRO;NOTCH1;NOV;PDCD10;POGLUT1;RFNG;SLC35C2;STAT3;TSPAN14;TSPAN15;TSPAN17;TSPAN33;TSPAN5	24	13536	29	18107	0.222501	0.92626
GO:0005547	phosphatidylinositol-3,4,5-trisphosphate binding	molecular_function	8	AKT1;ARAP1;ARAP2;ARAP3;ASAP1;COMMD1;CYTH3;DAPP1;FERMT2;GAB2;IQGAP1;IQGAP2;KIF16B;LOC102153142;LOC102156469;LOC608648;LOC610874;MAPKAP1;MYO1B;OGT;PARD3;RNF135;ADAP2;ZFYVE16;ZFYVE1	24	13536	29	18107	0.222501	0.92626
GO:0035176	social behavior	biological_process	5	ANXA7;BBS4;CHRNB2;CLN8;CNTNAP2;DLG4;DNAJC9;MRPS16;DVL1;EIF4EBP2;EN1;GNB1L;RTL10;KRAS;MAPK8IP2;MECP2;MKKS;LOC102153017;NLGN3;NRXN1;OXTR;PPP3CB;PTEN;SHANK1;SHANK2;SHANK3;SLC6A4	24	13536	29	18107	0.222501	0.92626
GO:0051496	positive regulation of stress fiber assembly	biological_process	10	APOA1;ARHGEF10;ARHGEF5;BAG4;BRAF;CARMIL1;CTGF;EPHA1;EVL;FHOD1;GPR65;ITGB1BP1;LIMK1;MTOR;MYOC;NF2;PAK1;PPM1F;RAC1;RAPGEF3;RGCC;SORBS3;WNT11;WNT4	24	13536	29	18107	0.222501	0.92626
GO:0060326	cell chemotaxis	biological_process	8	AGTR1;BCAR1;CCL27;LOC111098084;CXCL12;CXCL14;DOCK4;ELMO2;EPHB1;HBEGF;HGF;HOXB9;KIT;LEF1;LOC102153164;LOC106557449;LOC111089962;LOC476879;LOC111090369;PDGFB;PDGFRA;PDGFRB;PIP5K1A;PLXNB3;RHOG;SAA1	24	13536	29	18107	0.222501	0.92626
GO:0009749	response to glucose	biological_process	9	ACVR2B;EGR1;FKBP1B;GPAM;GPLD1;HNF1A;HNF1B;HNF4A;ILDR2;IRS2;KHK;LPL;NEUROD1;PFKL;PRLH;RMI1;SELENOS;SELENOT;SESN2;SIDT2;SLC30A8;SMAD2;SREBF1;THBS1	24	13536	29	18107	0.222501	0.92626
GO:0008237	metallopeptidase activity	molecular_function	7	ACE2;ACE;ACY1;ADAMTSL3;AFG3L2;AMZ2;ANPEP;BRCC3;CNDP2;COPS5;DNPEP;LOC111096076;MPND;MYSM1;NAALADL1;PAPPA2;PAPPA;SAXO2;SPG7;STAMBP;TAF2;TMEM27;TRABD2B;YME1L1	24	13536	30	18107	0.336606	0.92626
GO:0042752	regulation of circadian rhythm	biological_process	5	CCAR2;CSNK1D;CSNK1E;EZH2;HNRNPD;LOC480926;MAGEL2;MAPK9;NOCT;NR1D1;NR1D2;PPARA;PPARGC1A;PPP1CA;PPP1CC;PRKAA1;PRKDC;PROX1;ROCK2;RORB;TIMELESS;TOP2A;UBE3A;ZMYM5;PSPC1	24	13536	30	18107	0.336606	0.92626
GO:0051219	phosphoprotein binding	molecular_function	5	APTX;BBS1;CBX4;CSNK1G3;DPYS;FKBP4;LOC102155834;GPRIN1;IGF2R;LRP11;MID1;MID2;MTOR;PAFAH1B1;PHF6;PIH1D1;PITX2;PKD2;SNCA;SRC;TBK1;TBL2;THRAP3;TOX3;URI1	24	13536	30	18107	0.336606	0.92626
GO:0001756	somitogenesis	biological_process	9	ABI1;BMPR1A;EP300;FOXC2;FOXF1;KAT2A;LEF1;LFNG;MIB1;NKX3-1;NLE1;PALB2;PAX1;POFUT1;PRKDC;PSEN1;RBPJ;ROR2;SEMA3C;SMAD3;TCAP;TCF15;XRCC2;ZEB2	24	13536	30	18107	0.336606	0.92626
GO:0017158	regulation of calcium ion-dependent exocytosis	biological_process	8	C2CD4A;CACNA1A;DOC2B;LOC611813;RPH3AL;SYT11;SYT12;SYT13;SYT14;SYT16;SYT1;SYT2;SYT3;SYT4;SYT5;SYT6;SYT7;SYT9;SYTL1;SYTL2;SYTL3;SYTL4;SYTL5;TC2N	24	13536	33	18107	0.689376	0.92626
GO:0045668	negative regulation of osteoblast differentiation	biological_process	9	AXIN2;CDK6;CHRD;HAND2;HDAC4;HDAC7;LOC106557909;HOXA2;ID1;ID3;IGFBP5;LIMD1;LRP5;MEN1;NOCT;NOTCH1;PTCH1;RIOX1;RORB;SEMA4D;SFRP1;SMAD3;TOB1;TWIST2;TWSG1	24	13536	33	18107	0.689376	0.92626
GO:0019843	rRNA binding	molecular_function	7	DDX21;DDX28;DIEXF;EMG1;ERAL1;FASTKD2;FASTKD5;IMP3;LOC100855841;MRPL11;MRPL20;MRPS7;MTERF4;PPAN;PTCD3;RPF2;RPL11;RPL37;RPL8;RPL9;RPS11;RPS4X;RPS5;SBDS	24	13536	33	18107	0.689376	0.92626
GO:0030141	secretory granule	cellular_component	11	ANGPTL6;BRCA2;CHGA;CHGB;FSTL4;GARS;GHRHR;HILPDA;ITGB2;PCSK1N;RAB11FIP5;RAB27A;RAB27B;RAB3B;RNPEP;SCG5;SLC30A5;SLC30A8;STXBP5L;STXBP5;SYPL1;SYT1;SYTL4;VAMP3	24	13536	35	18107	0.850175	0.981448
GO:0005262	calcium channel activity	molecular_function	10	CACNA2D2;CUL5;DENND5A;DENND5B;LOC476820;MCUB;MCU;PANX1;PKD1L1;PKD1L3;PKD1;PKD2;PKDREJ;PSEN1;SLC24A3;TMEM37;TRPA1;TRPC1;TRPM3;TRPM4;TRPM7;TRPM8;TRPV1;TRPV2	24	13536	39	18107	0.977845	1
GO:0030317	flagellated sperm motility	biological_process	7	APOB;ATP2B4;CATSPER3;CCDC39;CELF3;CHRNA7;DNAH11;DNAH1;DNAJA1;DPCD;GAS8;ING2;INPP5B;LOC106559190;LOC488636;LRRC6;NEURL1;NPHP4;PLTP;RABL2B;SLIRP;SORD;SPAG6;TMF1	24	13536	40	18107	0.987329	1
GO:0000786	nucleosome	cellular_component	12	CENPA;H1F0;H1FX;H2AFJ;H2AFV;H2AFZ;HIST2H2AA4;HP1BP3;KAT6A;KAT6B;LOC100856099;LOC106558262;LOC100856216;LOC111089949;LOC611113;LOC475916;LOC478743;LOC481514;LOC483168;LOC488264;LOC488267;HIST1H1T;LOC489024;LOC489372;LOC611482;LOC488303;SHPRH;SLF1	24	13536	51	18107	0.999994	1
GO:0090200	positive regulation of release of cytochrome c from mitochondria	biological_process	9	BAD;BAX;BBC3;BCL2L11;BID;BNIP3;DNM1L;FAM162A;KCNMB4;LOC102151229;LOC102153535;LOC102153756;LOC102155086;LOC102155379;LOC102156686;LOC106557917;LOC111093862;LOC111094798;MFF;MLLT11;MMP9;PDCD5;TNFSF10;TP53	24	13536	57	18107	1	1
GO:0000723	telomere maintenance	biological_process	9	ATM;DCLRE1B;ERCC4;FBXO4;LOC102151191;LOC102153058;LOC102153836;LOC102154125;LOC106557691;LOC106560206;CCDC34;LOC111095260;LOC111096315;LOC111096743;LOC111098412;PARP3;PIF1;RAD51D;RPA1;RPA2;SMG6;TERF1;TERF2;XRCC5;XRCC6	24	13536	97	18107	1	1
GO:0001578	microtubule bundle formation	biological_process	7	CAPN6;CCSER2;CDK5RAP2;CHP1;CLASP1;CLIP1;FES;GAS2L2;KIF20A;MAP1B;MAP1S;MAP2;MARK4;MTCL1;NAV1;NCKAP5L;PLK1;PRC1;PSRC1;SPAST;TPPP3;TPPP;TTLL6	23	13536	24	18107	0.00841654	0.419418
GO:0031146	SCF-dependent proteasomal ubiquitin-dependent protein catabolic process	biological_process	11	BTRC;CCNF;CUL1;FBXL15;FBXL18;FBXL2;FBXL3;FBXL5;FBXL7;FBXO2;FBXO31;FBXO4;FBXO6;FBXO9;FBXW11;FBXW5;FBXW7;GRK7;RNF7;KIF14;LOC102153171;RBX1;SKP1;WWTR1	23	13536	24	18107	0.00841654	0.419418
GO:0051259	protein complex oligomerization	biological_process	8	AHNAK;AMFR;NUDT21;CAMK2D;CAMK2G;CAV2;DGKH;DVL2;GRHPR;HGSNAT;HSCB;CCDC117;HSF4;IRAK1;LOC608697;OAS1;P2RX7;PFKL;PFKM;SNX2;STX2;TEK;TRIM28;WDCP;ZNHIT6	23	13536	24	18107	0.00841654	0.419418
GO:0000775	chromosome, centromeric region	cellular_component	12	BIRC5;BOD1;CDCA8;CENPB;CENPL;CENPN;CENPP;DAXX;DNMT3A;DSCC1;HJURP;LOC102152056;MEAF6;MIS18A;MKI67;PPP2CA;PPP2R1A;PPP2R5A;PPP2R5C;SGO1;SGO2;STAG2;ZNF330	23	13536	24	18107	0.00841654	0.419418
GO:0001568	blood vessel development	biological_process	8	ALDH1A2;CDX2;COL1A1;COL1A2;COL5A1;CRKL;DHCR7;FLVCR1;FOXO1;GJA4;LAMA4;MAP3K3;MEF2C;MIB1;PLPP3;PSEN1;RAPGEF1;RAPGEF2;SPHK1;TBX3;TCF7L2;TGFB2;TIE1	23	13536	25	18107	0.0301951	0.818326
GO:0005762	mitochondrial large ribosomal subunit	cellular_component	13	LOC100855841;LOC607794;MPV17L2;MRPL11;MRPL13;MRPL15;MRPL17;MRPL19;MRPL21;MRPL22;MRPL27;MRPL2;MRPL32;MRPL3;MRPL41;MRPL43;MRPL46;MRPL47;MRPL49;MRPL51;MRPL58;MTERF4;NSUN3	23	13536	25	18107	0.0301951	0.818326
GO:0042470	melanosome	cellular_component	12	ANKRD27;CNP;CTSD;GCHFR;HPS4;LAMP1;LOC100686305;LOC102154740;MYO7A;MYRIP;PMEL;RAB17;RAB1A;RAB27A;RAB27B;RAB29;RAB32;RAB38;RAB5A;RAC1;SYTL2;TMEM33;YWHAZ	23	13536	25	18107	0.0301951	0.818326
GO:0005080	protein kinase C binding	molecular_function	8	CAVIN3;DACT1;DACT2;DACT3;DSP;HDAC5;HDAC7;LOC106557909;HDAC9;HSPB1;ITGAV;LOC102153861;MARCKS;PKN1;PKP2;PLEK;PRKCB;RACK1;SQSTM1;TDG;TOP2A;TOP2B;TWF2;TLR9;YWHAG	23	13536	25	18107	0.0301951	0.818326
GO:0070301	cellular response to hydrogen peroxide	biological_process	8	AQP1;ECT2;EP300;EZH2;FXN;HDAC6;IL6;IMPACT;KDM6B;MAP3K5;MAPK7;NFE2L2;OSER1;PARK7;PLEKHA1;RELA;RHOB;RPS3;SETX;SIRT1;TNFAIP3;ZNF277;ZNF580	23	13536	25	18107	0.0301951	0.818326
GO:0071479	cellular response to ionizing radiation	biological_process	7	BBC3;CDKN1A;CLOCK;ECT2;EEF1D;FIGNL1;GADD45A;GRB2;HUS1;INO80;INTS7;MAPK14;RAD1;RAD51AP1;RAD51;RAD9A;RHNO1;RHOB;SIRT1;SNAI2;SPIDR;SWI5;TP53	23	13536	26	18107	0.0760538	0.92626
GO:0008144	drug binding	molecular_function	4	ALB;ATP1B1;CHKA;DCK;FSCN1;GLRB;HMGB2;HTR2A;LOC488636;MAATS1;NR1I2;PDE2A;PDE4D;PNP;PPARA;PPARD;PPARG;PPP3CA;PPP3CB;PYGL;RARB;SFRP1;SRP54;TOP2A	23	13536	26	18107	0.0760538	0.92626
GO:0016235	aggresome	cellular_component	8	CDH1;DBF4B;EEF2;EID1;EPS15;GIT1;HDAC6;HOXD3;HSPB7;MECOM;MVB12A;ORC6;POLD1;PRKN;PSEN1;RAB11B;RNF32;SFMBT2;SQSTM1;SYNE2;TRIM66;UBQLN1;URB2	23	13536	27	18107	0.151362	0.92626
GO:0090307	mitotic spindle assembly	biological_process	9	ARHGEF10;BIRC2;BIRC3;BIRC5;CHEK2;FLNA;KIF11;KIF2A;KIF3B;KIFC1;KPNB1;LOC111097612;TUBGCP6;MYBL2;NEK2;PIBF1;RAB11A;SPICE1;TPX2;TUBGCP2;TUBGCP3;TUBGCP4;TUBGCP5;XIAP	23	13536	27	18107	0.151362	0.92626
GO:0000062	fatty-acyl-CoA binding	molecular_function	6	ACAD11;ACAD8;ACAD9;ACADL;ACADM;ACADSB;ACADS;ACADVL;ACBD3;ACBD4;ACBD5;ACBD6;ACOT7;ACOX1;ACOX2;ACOX3;DBI;ECI2;ETFA;GCDH;IVD;SOAT1;SOAT2	23	13536	27	18107	0.151362	0.92626
GO:0048704	embryonic skeletal system morphogenesis	biological_process	10	ALX1;ALX4;DLG1;EYA1;FLVCR1;HOXA3;HOXA5;HOXA6;HOXA7;HOXB2;HOXB3;HOXB4;HOXB5;HOXB6;HOXB7;HOXB8;HOXD11;HOXD10;HOXD3;HOXD9;MEGF8;OSR2;SATB2;ZEB1	23	13536	27	18107	0.151362	0.92626
GO:0030073	insulin secretion	biological_process	10	ACVR2B;CPLX1;CYB5R4;FAM3B;FFAR1;FFAR3;FKBP1B;GPR119;HNF1A;HNF1B;IL1RN;ILDR2;LEP;LOC111090913;NEUROD1;PCLO;PDX1;PTPRN;RIMS2;SLC30A8;SMAD2;SNX19;STXBP3;VGF	23	13536	27	18107	0.151362	0.92626
GO:0030218	erythrocyte differentiation	biological_process	6	ACIN1;ADAR;ATPIF1;BMP4;CASP3;DNASE2;DYRK3;EPAS1;FLVCR1;GATA3;HCLS1;HIPK2;JAK2;KIT;LYN;NFE2L1;PKNOX1;PTPN2;SFXN1;SLC25A38;RPSA;SMAD5;SPI1;ZFPM1	23	13536	27	18107	0.151362	0.92626
GO:0090575	RNA polymerase II transcription factor complex	cellular_component	9	ASCL2;ASCL3;CARM1;CEBPA;GATA4;HIF1A;HIPK2;HYAL2;NEUROD1;NFYA;NR1H3;NR5A2;NR6A1;PBX1;PPARG;RARG;RXRA;STAT3;TCF12;TCF3;TRIM28;VDR;WWOX	23	13536	27	18107	0.151362	0.92626
GO:0030097	hemopoiesis	biological_process	6	ADD2;ANGPT1;ASH2L;BRCA2;CIAPIN1;CRIP2;CUL4A;FLCN;FLT3;LOC102151229;LOC449531;MKNK2;LOC106560107;PDGFB;PGM3;RTKN2;SGPL1;SOD2;TAZ;TGFB2;TIPARP;TTC7A;TWSG1;ZBTB16	23	13536	28	18107	0.254084	0.92626
GO:0008233	peptidase activity	molecular_function	5	APH1B;BRCC3;CAPN3;F2RL1;FGL2;HMCES;IMMP2L;LOC487429;LTF;MINDY4;MPND;NAALADL1;NEU3;SPCS2;PARK7;PEPD;PIGK;PPP2R5C;SLPI;SPCS1;SPCS3;TRABD2B;UCHL3;UNC5CL	23	13536	28	18107	0.254084	0.92626
GO:0005834	heterotrimeric G-protein complex	cellular_component	7	GNA12;GNA13;GNAI1;GNAI2;GNAI3;GNAO1;GNAT2;GNB1;GNB2;GNG10;GNG11;GNG12;GNG14;GNG2;GNG4;GNG5;GNG7;GNGT2;LOC106559503;RGS11;RGS6;RGS7;RGS9	23	13536	28	18107	0.254084	0.92626
GO:0016049	cell growth	biological_process	5	ADRA1A;ATP6V0E1;CACNA1A;EMP1;EMP3;IL7R;ITGAV;LAMTOR1;LAMTOR2;MTOR;MTPN;NDRG4;NOTCH2;NUBP1;NUPR1;PRMT6;RASGRP4;ROS1;RPTOR;SGMS1;TGFB1;TGFB2;TGFB3	23	13536	28	18107	0.254084	0.92626
GO:0004364	glutathione transferase activity	molecular_function	6	CLIC1;CLIC2;CLIC3;CLIC4;CLIC5;CLIC6;EEF1E1;EEF1G;GDAP1;GSTA4;GSTO1;GSTP1;GSTZ1;LOC100686488;LOC474938;LOC476006;LOC477556;LOC477558;LOC479911;LOC479912;LOC486404;LOC610304;MGST1	23	13536	30	18107	0.501809	0.92626
GO:0003730	mRNA 3'-UTR binding	molecular_function	9	ANGEL2;CARHSP1;CIRBP;CPEB1;CPEB2;CPEB3;CPEB4;ELAVL4;FXR1;HNRNPA2B1;LARP1;LOC111093016;LOC610648;PUM1;PUM2;RBMS3;RC3H1;RNF20;RNF40;SECISBP2;SERBP1;TARDBP;ZNF385A	23	13536	30	18107	0.501809	0.92626
GO:0060291	long-term synaptic potentiation	biological_process	10	BRAF;DRD1;GFAP;ITPR3;LOC111098223;LRRTM2;MAPK1;MECP2;MPP2;NLGN3;NPTN;LOC111093395;NTRK2;PTEN;RELN;SERPINE2;SHANK2;SLC8A2;SLC8A3;SNAP25;SNCA;STX3;STX4;SYT12;VAMP2	23	13536	30	18107	0.501809	0.92626
GO:0015991	ATP hydrolysis coupled proton transport	biological_process	11	ATP1A3;ATP5A1;ATP5B;ATP5G1;ATP5G2;ATP5G3;ATP6AP1L;ATP6AP1;ATP6V0A1;ATP6V0A2;ATP6V0B;ATP6V0C;ATP6V0D1;ATP6V0E1;ATP6V0E2;ATP6V1A;ATP6V1B2;ATP6V1C1;ATP6V1C2;ATP6V1E1;ATP6V1H;LOC488636;TCIRG1	23	13536	31	18107	0.621724	0.92626
GO:0030514	negative regulation of BMP signaling pathway	biological_process	15	ABL1;BMPER;CAV1;CHRDL1;CHRD;CTDSPL2;DKK1;FSTL3;FZD1;GREM1;HIPK2;HTRA3;LEMD3;NOTCH1;PPM1A;SFRP1;SMAD6;SMAD7;SMURF2;SPART;CCDC169;TOB1;TRIM33;TWSG1	23	13536	32	18107	0.72599	0.92626
GO:0050679	positive regulation of epithelial cell proliferation	biological_process	6	BAD;BMPR1A;C5AR1;CCL5;CYP7B1;EGFR;ERBB2;EYA1;FGF1;FOXP1;HRAS;HYAL1;IGF1;IL6;KIF3A;NOTCH1;NR4A3;OSR1;OSR2;SFRP1;SOX9;STOX1;WDR48	23	13536	32	18107	0.72599	0.92626
GO:0006096	glycolytic process	biological_process	7	ALDOA;LOC102157295;ALDOB;ALDOC;BPGM;ENO1;ENO2;ENO3;GAPDHS;GAPDH;GCK;GPI;HK1;HK2;LOC100683724;LOC100688969;LOC106559190;LOC476315;PFKFB2;PGAM1;PGK1;PKLR;PKM;TPI1	23	13536	32	18107	0.72599	0.92626
GO:0071346	cellular response to interferon-gamma	biological_process	7	AIF1;CCL17;CCL20;CCL23;CCL24;CCL25;CCL2;CCL5;CCL7;CCL8;CD58;CX3CL1;DAPK1;DAPK3;EPRS;EVL;GBP5;LOC100856137;LOC480601;LOC480603;MRC1;NOS2;SYNCRIP	23	13536	34	18107	0.873953	0.99779
GO:0005109	frizzled binding	molecular_function	7	BAMBI;CTHRC1;DVL1;DVL2;DVL3;FZD1;FZD7;GOPC;LRP6;MYOC;NDP;ROR2;RSPO3;RYK;SFRP1;WNT11;WNT2;WNT3;WNT4;WNT5B;WNT7B;WNT9A;ZNRF3	23	13536	35	18107	0.919529	0.99779
GO:0001750	photoreceptor outer segment	cellular_component	9	BBS4;CCNA2;BBS7;CIB2;GNA11;GNAQ;GNAT2;GNB5;HNF1A;IFT20;IQCB1;LOC102154740;MAK;MAP1B;MYO7A;MYRIP;OCRL;PTGS1;PTPRK;RAB27A;RGS9BP;RGS9;RP1;SHANK2	23	13536	38	18107	0.983047	1
GO:0043408	regulation of MAPK cascade	biological_process	10	ATP6AP2;BMP1;BMP2;BMP3;BMP4;BMP6;C23H3orf33;C37H2orf88;GDF11;GDF15;GDF6;GDF9;GRB2;ID1;INHBA;INHBB;LOC100855618;LOC607768;MYOC;RNF41;STK40;TGFB2;TGFB3	23	13536	38	18107	0.983047	1
GO:0042472	inner ear morphogenesis	biological_process	10	ABR;ALDH1A3;ATP8A2;CELSR1;CHRNA10;NUP98;EPHB2;FGFR1;FZD3;FZD6;GATA3;INSIG1;INSIG2;ITGA8;KCNQ4;MAFB;NR4A3;NTN1;PRRX1;ROR2;SIX4;SOBP;SPRY2;TFAP2A	23	13536	40	18107	0.994851	1
GO:0000118	histone deacetylase complex	cellular_component	13	CBX5;CIR1;DNTTIP1;ELMSAN1;HDAC10;HDAC11;HDAC4;HDAC5;HDAC6;HDAC7;LOC106557909;HDAC9;HINT1;NCOR2;LOC111092506;NRIP1;PHF21A;RERE;SAP30;SATB2;TAL1;TBL1XR1;TBL1X;TRERF1	22	13536	22	18107	0.00165307	0.14769
GO:0005689	U12-type spliceosomal complex	cellular_component	9	DHX15;LOC610615;LSM7;PDCD7;PHF5A;RBM41;RNPC3;SF3B1;SF3B2;SF3B3;SF3B5;SF3B6;SNRNP25;SNRNP48;SNRPB;SNRPD1;SNRPD3;SNRPE;SNRPF;SNRPG;ZCRB1;ZMAT5	22	13536	22	18107	0.00165307	0.14769
GO:0031902	late endosome membrane	cellular_component	11	ANXA6;CD63;CHMP1B;CYBASC3;DLA-DRA;GOSR2;LAMP2;MARCH1;PIP4P1;PIP4P2;RAB7A;RNF13;SLC11A2;SNF8;SPPL2A;VAMP8;VPS36;VPS39;VPS41;VTI1A;VTI1B;WDR91	22	13536	22	18107	0.00165307	0.14769
GO:0000387	spliceosomal snRNP assembly	biological_process	12	CLNS1A;DDX20;GEMIN2;GEMIN4;GEMIN5;GEMIN6;GEMIN7;GEMIN8;LOC102153257;LSM4;PRMT5;PRMT7;SART1;SNRPB;SNRPC;SNRPD1;SNRPD2;SNRPD3;SNRPE;SNRPF;SNRPG;STRAP	22	13536	22	18107	0.00165307	0.14769
GO:0016050	vesicle organization	biological_process	5	ALS2;CADPS;CAV1;FNBP1L;LOC111097364;PLEKHF1;SNX10;SNX11;SNX12;SNX18;SNX1;SNX30;SNX32;SNX33;SNX3;SNX4;SNX5;SNX6;SNX7;SNX8;SNX9;SORT1	22	13536	22	18107	0.00165307	0.14769
GO:0043021	ribonucleoprotein complex binding	molecular_function	4	BOP1;CD2BP2;EEFSEC;EZH2;HNRNPU;IFIH1;ITCH;PES1;PHF6;PITX2;PPIH;PQBP1;PRMT5;PRMT7;PRPF6;RNASEL;RNF135;ADAP2;SECISBP2;SMG6;SRP54;UHMK1;WDR12	22	13536	22	18107	0.00165307	0.14769
GO:0006099	tricarboxylic acid cycle	biological_process	10	ACO2;CS;DHTKD1;DLST;FH;IDH1;IDH2;IDH3A;IDH3B;IDH3G;LOC102152275;LOC608656;MDH1;MDH2;OGDHL;OGDH;PDHA1;SDHA;SDHB;SDHC;SDHD;SUCLG1	22	13536	22	18107	0.00165307	0.14769
GO:0051881	regulation of mitochondrial membrane potential	biological_process	6	BAK1;BAX;BCL2L1;BCL2;BCO2;LOC111092250;MUL1;NDUFS1;PANK2;PARK7;PID1;PRKN;PYCR1;SLC25A33;SLC25A36;SOD1;SOD2;SPART;CCDC169;STOX1;TUSC2;UBB;UCP2	22	13536	23	18107	0.010845	0.499679
GO:0048843	negative regulation of axon extension involved in axon guidance	biological_process	6	NRP1;PLXNA3;RYK;SEMA3A;SEMA3B;SEMA3C;SEMA3D;SEMA3E;SEMA3F;SEMA3G;SEMA4A;SEMA4C;SEMA4D;SEMA4F;SEMA5A;SEMA5B;SEMA6A;SEMA6B;SEMA6C;SEMA6D;SEMA7A;TWNK;SEMA4G	22	13536	23	18107	0.010845	0.499679
GO:0006890	retrograde vesicle-mediated transport, Golgi to ER	biological_process	7	ARCN1;COG4;COG7;COPB2;COPE;DNAJC28;LOC478405;GOLPH3;HTT;KIF1C;KLC1;LMAN2;LOC100856546;LOC100856290;LOC609055;NBAS;RAB6A;RAB6B;RER1;SCYL1;STX18;TMED7;TMEM115;UVRAG	22	13536	23	18107	0.010845	0.499679
GO:0031252	cell leading edge	cellular_component	5	ABL1;ACTN1;ARF1;ARPC2;BCAS3;CLASP2;CXCR4;DCTN1;DOCK8;HDAC6;ITGB4;JMY;KDF1;LDB1;LMO4;NDEL1;PAFAH1B1;PHLDB2;SCRIB;SHTN1;SSX2IP;VIM	22	13536	23	18107	0.010845	0.499679
GO:0010634	positive regulation of epithelial cell migration	biological_process	11	CAPN7;CLASP1;CLASP2;CTSH;ENPP2;EPB41L5;GLIPR2;GNG2;HDAC6;HIF1A;HYAL1;JUN;PFN1;PPM1F;PRKCE;RAB11A;RAB25;SOX9;SRC;TGFB2;TGFBR2;VIL1	22	13536	23	18107	0.010845	0.499679
GO:0051059	NF-kappaB binding	molecular_function	6	ANXA4;BCL10;CDK5RAP3;CDKN2A;COMMD6;COMMD7;CPNE1;RBM12;DNAJA3;EP300;FAF1;GSK3B;HDAC2;HDAC3;HIF1AN;MTDH;NFKBIA;PSMA6;RELA;RNF25;RPS3;SETD6;TP53BP2	22	13536	24	18107	0.0375583	0.910531
GO:0006513	protein monoubiquitination	biological_process	11	CUL1;CUL3;DTL;FBXL2;HUWE1;KLHL12;KLHL22;MGRN1;NEDD4;NEURL1;PEX12;PRKN;RAD18;RBX1;RNF126;TRIM21;TRIM25;UBE2B;UBE2D3;UBE2O;UBE2T;UBE4B	22	13536	24	18107	0.0375583	0.910531
GO:0032007	negative regulation of TOR signaling	biological_process	10	AKT1S1;ARNTL;DDIT4;DEPDC5;FLCN;FNIP1;GSK3A;HIF1A;MTM1;NPRL2;NPRL3;PDCD6;PRKAA1;PRKAA2;SH3BP4;SIRT1;TBC1D7;TMEM127;TNFAIP8L1;TSC1;TSC2;UBR2	22	13536	24	18107	0.0375583	0.910531
GO:0032154	cleavage furrow	cellular_component	7	ECT2;LIMA1;MEN1;MYH10;MYH9;MYLK;NF2;PDXP;PKN1;PKN2;PPP1CC;RAB11A;RAB11FIP4;RALA;RHOB;RHOC;SEPT7;SPIRE2;STAMBP;TPM3;WDR73;ZFYVE19	22	13536	24	18107	0.0375583	0.910531
GO:0042177	negative regulation of protein catabolic process	biological_process	9	AZIN1;AZIN2;BANP;DEDD;EGFR;FLNA;FMN2;IRAK3;MAD2L2;MDM4;NOS2;NRG1;PHB;RELA;RILP;SERPINE2;SF3B3;SIRT2;SMAD3;SMAD4;SNX12;SNX3	22	13536	24	18107	0.0375583	0.910531
GO:0048286	lung alveolus development	biological_process	9	ABCA12;ADA;ATXN1L;BMP4;BMPR2;ERRFI1;FOXF1;FOXP2;HOPX;HOXA5;HS6ST1;IGFBP5;LIF;MAN1A2;MAN2A1;MAPK8IP3;RC3H2;SELENON;SFTPD;STK40;TCF21;TNS3	22	13536	24	18107	0.0375583	0.910531
GO:0010977	negative regulation of neuron projection development	biological_process	8	B2M;BAG5;CIB1;DPYSL3;GAK;GFAP;GFI1;GSK3B;INPP5J;ITM2C;KANK1;LOC100688321;MAP4K4;NGFR;PAQR3;PRKCSH;RAB29;RAP1GAP2;SNAPIN;SPOCK1;STMN2;VIM	22	13536	24	18107	0.0375583	0.910531
GO:0060548	negative regulation of cell death	biological_process	7	AGR2;CHMP2A;CTGF;CYR61;DUS2;IMPACT;NCK1;NOV;PACRG;PARP16;PRKD1;PRKN;RAD18;SMAD4;SOX4;SRSF6;TMEM109;VPS4B;WISP1;WISP2;WISP3;ZFPM2	22	13536	24	18107	0.0375583	0.910531
GO:0071011	precatalytic spliceosome	cellular_component	9	BCAS2;LOC610615;LSM2;LSM3;PHF5A;PLRG1;PRPF31;PRPF38A;PRPF38B;RBMX2;SF3B2;SF3B5;SF3B6;SNRNP27;SNRNP40;SNRNP70;SNRPD1;SNRPD2;SNRPD3;SNRPE;SNRPG;SNU13	22	13536	24	18107	0.0375583	0.910531
GO:0061077	chaperone-mediated protein folding	biological_process	8	CHORDC1;CLU;CRTAP;FKBP10;FKBP11;FKBP1A;FKBP1B;FKBP2;FKBP3;FKBP4;LOC102155834;FKBP5;FKBP7;FKBP8;FKBP9;FKBPL;PEX19;PPIB;PPID;TTC9C;TTC9;UNC45A;UNC45B	22	13536	24	18107	0.0375583	0.910531
GO:0051056	regulation of small GTPase mediated signal transduction	biological_process	9	AMOT;ARHGAP18;ARHGAP22;ARHGAP26;ARHGAP6;CHN1;CHN2;GARNL3;INPP5B;LOC100685341;LOC111095099;OPHN1;RALGAPA2;RALGAPB;RAP1GAP2;RAP1GAP;SIPA1L1;SIPA1L2;SIPA1L3;SIPA1;TSC2;VAV2	22	13536	24	18107	0.0375583	0.910531
GO:0032526	response to retinoic acid	biological_process	6	ACER2;ASXL1;CDKN2D;CLK2;CTSH;DKK1;DNAAF2;DPH1;OVCA2;GDAP1;GDAP2;HSD17B2;KLF4;LOC100856533;LOC111091360;PPARG;RARG;RBP4;RXRA;SCAMP3;SLC10A3;TIE1;TMEM161A	22	13536	24	18107	0.0375583	0.910531
GO:0032008	positive regulation of TOR signaling	biological_process	10	FLCN;GOLPH3;HDAC3;LAMTOR1;LAMTOR2;LAMTOR3;LAMTOR4;MIOS;MLST8;RELN;RHEB;RICTOR;RPTOR;RRAGA;RRAGB;RRAGC;RRAGD;SEC13;SEH1L;SLC38A9;WDR24;WDR59	22	13536	24	18107	0.0375583	0.910531
GO:0071339	MLL1 complex	cellular_component	10	AK6;TAF9;ASH2L;CHD8;E2F6;HCFC1;KAT8;KMT2A;LAS1L;MAX;MCRS1;PHF20;PRPF31;RBBP5;RNF2;RUVBL1;RUVBL2;TAF4;TAF6;TAF7;TEX10;WDR5B;WDR5	22	13536	24	18107	0.0375583	0.910531
GO:0019722	calcium-mediated signaling	biological_process	9	AGTR1;ALMS1;BHLHA15;CCR5;CXCR4;EDN1;LAT2;LOC111097376;LOC474898;LRRK2;MCTP1;MCU;NCALD;PDPK1;PLCG1;PPP1R9A;PPP1R9B;RCAN2;RCAN3;SAMD14;SPHK1;TPCN2	22	13536	25	18107	0.091555	0.92626
GO:0015631	tubulin binding	molecular_function	6	AGBL4;AGBL5;TRNAA-AGC;ATF5;BIRC5;CENPJ;DAG1;GPHN;IFT81;LRRK2;NCALD;PHF6;PRKN;RITA1;STMN1;STMN2;STMN3;TBCC;TPPP3;TPPP;TTLL4;TTLL6;VBP1	22	13536	25	18107	0.091555	0.92626
GO:0006446	regulation of translational initiation	biological_process	9	CTIF;EIF1;EIF2B1;EIF2B2;EIF3A;EIF3B;EIF3D;EIF3E;EIF3F;EIF3I;EIF3J;EIF3L;EIF3M;EIF4A1;SENP3;EIF4A2;EIF5B;EIF5;GLE1;KLHL25;LOC479795;NCBP1;NCBP2	22	13536	25	18107	0.091555	0.92626
GO:0035115	embryonic forelimb morphogenesis	biological_process	10	ALDH1A2;ALX3;ALX4;CRABP2;CTNNB1;EN1;HOXA11;HOXA9;HOXD9;IFT122;LNPK;LOC102151229;LOC449531;MSX1;MSX2;OSR1;OSR2;RDH10;RECK;SHOX2;TBX3;TBX5	22	13536	25	18107	0.091555	0.92626
GO:0005844	polysome	cellular_component	8	AGO2;ATXN2;CALR;EEF2;EIF4B;EIF4H;EPM2A;FMR1;FXR1;FXR2;IMPACT;LOC102156482;LOC102156972;LOC475337;MSI2;NAA30;NAA35;NAA38;PSMA6;RPS3;UNK;VBP1	22	13536	25	18107	0.091555	0.92626
GO:0005158	insulin receptor binding	molecular_function	6	DOK1;DOK4;DOK5;DOK6;DOK7;ENPP1;FRS2;FRS3;IGF1R;IGF1;IGF2;IRS1;IRS2;LMBRD1;PHIP;PIK3R1;PTPN11;SHC1;SNX1;SNX2;SNX4;SORBS1	22	13536	25	18107	0.091555	0.92626
GO:0005086	ARF guanyl-nucleotide exchange factor activity	molecular_function	4	AMPH;ARFGEF1;ARFGEF2;ARFGEF3;CYTH1;CYTH2;CYTH3;CYTH4;FBXO8;FNBP1L;FNBP1;GBF1;IQSEC1;IQSEC2;IQSEC3;NCK1;NCK2;PSD2;PSD3;PSD4;PSD;TRIP10	22	13536	25	18107	0.091555	0.92626
GO:0034260	negative regulation of GTPase activity	biological_process	15	AMOT;ARFGEF1;ARL2;BBS4;BCAS3;DAB2IP;F11R;FZD10;GMIP;HRAS;LRRK2;MKKS;LOC102153017;PDE6D;PLXNB3;RCC2;RDX;RTKN;SH3BP4;SLIT2;SPRY1;SPRY2;TTC8	22	13536	25	18107	0.091555	0.92626
GO:0030513	positive regulation of BMP signaling pathway	biological_process	15	ACVRL1;BMP4;BMPR2;CYR61;FBXL15;FKBP8;GATA6;GPC3;ILK;KCP;MSX1;MSX2;NEO1;NOTCH1;RBPJ;SMAD2;SMAD4;SULF1;TWSG1;UBE2O;VSIR;ZNF423	22	13536	25	18107	0.091555	0.92626
GO:0042552	myelination	biological_process	10	AFG3L2;AMIGO1;ATRN;EIF2B2;EIF2B4;EIF2B5;ERBB2;FAM126A;GAL3ST1;HEXA;HEXB;JAM3;KEL;MBP;NAB1;NAB2;NFASC;SERINC5;SLC8A3;TSC1;XK;ZNF24;ZNF396	22	13536	26	18107	0.176811	0.92626
GO:0007346	regulation of mitotic cell cycle	biological_process	7	BIRC5;CDC123;CDK5RAP3;CDK8;CYLD;DAPK3;INTS13;LOC100682773;LOC111092504;MAP4K4;MINK1;LOC111096071;PIM1;PIM2;PIM3;PTCH1;RPA3;SAE1;SIK1;SIRT1;THAP1;TTC28;ZNF268	22	13536	26	18107	0.176811	0.92626
GO:0055088	lipid homeostasis	biological_process	7	ABCA12;ABCB4;ACACA;ACAD11;ACAD8;ACAD9;ACADL;ACADM;ACADSB;ACADS;ACADVL;ACOX1;ACOX2;ACOX3;CEBPA;COL4A3BP;ETFA;GCDH;IVD;NR1D2;USF1;USF2	22	13536	26	18107	0.176811	0.92626
GO:0000186	activation of MAPKK activity	biological_process	13	BMP4;BRAF;EGF;EIF2AK2;SULT6B1;FGF2;GADD45B;LAMTOR2;LRRK2;MAP3K10;MAP3K12;MAP3K15;MAP3K20;MAP3K21;MAP3K4;MAP3K5;MAP3K6;MAP3K7CL;MAP3K7;MAP3K9;PSEN1;RAF1;TAOK2;TMEM219	22	13536	26	18107	0.176811	0.92626
GO:0016757	transferase activity, transferring glycosyl groups	molecular_function	5	ALG9;B3GLCT;B4GALT2;B4GALT3;B4GALT4;B4GALT5;B4GALT6;GALNT12;GALNT13;GALNT15;GALNT16;GALNT17;GALNT18;GALNT7;GALNT9;GLT8D1;GLT8D2;GTDC1;LARGE2;LOC102152620;RFNG;XXYLT1	22	13536	26	18107	0.176811	0.92626
GO:0008203	cholesterol metabolic process	biological_process	8	ABCA1;ABCG1;ANGPTL3;APOB;APOC1;APP;CEBPA;CLN6;CLN8;FDX1;HNF1A;LCAT;LEPR;LEP;LOC478196;LRP5;MBTPS2;NSDHL;OSBPL5;SCAP;SOAT1;SOAT2	22	13536	27	18107	0.288791	0.92626
GO:0071560	cellular response to transforming growth factor beta stimulus	biological_process	8	ANKRD1;CAV1;CLEC3B;EPB41L5;HYAL2;MAPK7;MEF2C;PDCD5;PDE2A;PDE3A;PPM1A;SFRP1;SMAD7;SOX5;SOX6;SOX9;STK16;TGFB1;WNT2;WNT4;WWOX;YES1	22	13536	27	18107	0.288791	0.92626
GO:0003151	outflow tract morphogenesis	biological_process	10	ATF2;CITED2;DHRS3;DVL2;EYA1;FZD1;FZD2;GJA5;HIF1A;ILK;JUN;MEF2C;NEDD4;NPY1R;NPY2R;PLXND1;RBPJ;SEMA3C;SIX1;TBX3;WNT11;ZFPM1	22	13536	28	18107	0.41605	0.92626
GO:0035019	somatic stem cell population maintenance	biological_process	10	ASCL2;BCL9L;BCL9;BRAF;CDX2;CUL4A;KLF10;LDB1;LDB2;LIG4;LRP5;PRDM16;RAF1;RBPJ;SFRP1;SOX4;SOX9;SPI1;VPS72;YAP1;ZFP36L2;ZHX2	22	13536	28	18107	0.41605	0.92626
GO:0021762	substantia nigra development	biological_process	11	ATP5J;CALM3;CCDC14;CNP;FGF2;G6PD;GNB4;HSPA5;INA;LOC479901;MAOB;MAPKAP1;NDRG2;NDUFS3;PADI2;RAD1;SIRT2;SUDS3;SYNGR3;YWHAE;YWHAQ;ZNF148	22	13536	28	18107	0.41605	0.92626
GO:0001707	mesoderm formation	biological_process	10	ACVR1;BMP7;BMPR1A;BMPR2;CHRD;DKK1;EXT2;GPI;MACF1;NF2;NR4A3;POFUT2;PRKACA;PRKAR1A;SMAD2;SMAD3;SNAI1;SRF;TLX2;TWSG1;TXNRD1;WLS	22	13536	29	18107	0.544583	0.92626
GO:0001503	ossification	biological_process	5	CTGF;DHX36;EIF2AK3;EXT2;FOXC2;GPM6B;HRC;IGSF10;LOC102151229;LOC111094605;LOC449531;MGP;MMP9;PAM16;PPARGC1B;RASSF2;SLC26A2;SOX9;SP3;TNFSF11;TRAF6;TWSG1	22	13536	29	18107	0.544583	0.92626
GO:0051262	protein tetramerization	biological_process	9	AMFR;NUDT21;ASL;CCL5;CPSF6;CPSF7;CUTC;DNM1;FH;HMGCL;HMGCR;IGF1R;LOC102156059;ME1;MTMR2;SBF2;SHMT1;TP53;TP73;TRPM3;TRPM6;TRPM7;UXS1	22	13536	31	18107	0.761188	0.937192
GO:0033209	tumor necrosis factor-mediated signaling pathway	biological_process	9	CDIP1;COMMD7;FAS;FOXO3;IKBKB;JAK2;LOC100688321;LOC609235;NGFR;PTK2B;RELT;TNFRSF11A;TNFRSF11B;TNFRSF14;TNFRSF1A;TNFRSF1B;TNFRSF21;TNFRSF25;TNFSF18;TRAF2;TRAF3;TXNDC17	22	13536	31	18107	0.761188	0.937192
GO:0000993	RNA polymerase II core binding	molecular_function	7	AGO2;CCAR2;CDC73;CTR9;ELP1;ELP2;ELP3;LOC102157048;LOC111092487;LOC475337;LOC609094;LOC609558;PAF1;PCF11;RECQL5;RPRD1B;RTRAF;SMYD2;SMYD3;UVSSA;WAC;ZNF326	22	13536	32	18107	0.838622	0.972031
GO:0002181	cytoplasmic translation	biological_process	8	EIF3J;EIF4B;EIF4H;FTSJ1;LOC102156972;LOC608703;MRPL2;MRTO4;RPL15;RPL22L1;RPL22;RPL26;RPL29;RPL31;RPL36;RPL6;RPL7L1;RPL7;RPL8;RPL9;RPLP0;RPLP2	22	13536	33	18107	0.895465	0.99779
GO:0032391	photoreceptor connecting cilium	cellular_component	9	ARL3;BBS4;CETN2;CETN3;FAM161A;IFT122;IFT20;IFT52;IFT57;IQCB1;KIF3A;KIFAP3;LOC487177;LOC487178;MYO7A;NPHP4;RP1;SPATA7;TBCC;TTC8;WDR19;LOC111095293;WHRN	22	13536	34	18107	0.934903	0.99779
GO:0046426	negative regulation of JAK-STAT cascade	biological_process	10	ASPN;CHAD;DAB1;DCN;FLRT2;FLRT3;HGS;LRRC15;LRRC19;LRRC4B;LRRC4;LRRTM4;NEUROD1;PODNL1;PODN;LOC106558831;PTPRD;RTN4RL1;SOCS2;SOCS4;SOCS5;SOCS6;SOCS7	22	13536	35	18107	0.960923	1
GO:0048008	platelet-derived growth factor receptor signaling pathway	biological_process	10	BCAR1;CSRNP1;FER;GAB1;IQGAP1;ITGB3;MYO1E;NRP1;PDGFA;PDGFB;PDGFC;PDGFD;PLEKHA1;PTPN11;PTPRJ;RAPGEF1;SGPL1;SRC;TIPARP;TXNIP;ZFAND5	21	13536	21	18107	0.00221217	0.178515
GO:0006506	GPI anchor biosynthetic process	biological_process	9	ALG5;DPM1;DPM2;DPM3;PIGA;PIGB;PIGC;PIGF;PIGG;PIGH;PIGL;PIGM;PIGN;PIGO;PIGP;PIGQ;PIGV;PIGW;PIGX;PIGZ;PYURF	21	13536	21	18107	0.00221217	0.178515
GO:0019706	protein-cysteine S-palmitoyltransferase activity	molecular_function	8	ZDHHC12;ZDHHC13;ZDHHC14;ZDHHC15;ZDHHC16;ZDHHC17;ZDHHC18;ZDHHC1;ZDHHC20;ZDHHC21;ZDHHC22;ZDHHC23;ZDHHC24;ZDHHC2;ZDHHC3;ZDHHC4;C6H7orf26;ZDHHC5;ZDHHC6;ZDHHC7;ZDHHC8;ZDHHC9	21	13536	22	18107	0.0139532	0.570349
GO:0016197	endosomal transport	biological_process	6	ABCA1;ALMS1;ALS2;AP5B1;AP5S1;AP5Z1;BLOC1S1;BLOC1S3;BLOC1S5;DCLK1;PICALM;RAB10;SNX18;SNX33;SNX9;UBAP1;VPS16;VPS4A;WASHC5;WAS;ZFYVE16	21	13536	22	18107	0.0139532	0.570349
GO:0006611	protein export from nucleus	biological_process	6	ADAR;ANKLE1;CALR;CCHCR1;CHP1;CSE1L;GSK3B;HSPA9;NUP214;NUP88;NUPL2;NUTF2;NXT1;PKD1;RAN;STRADA;STRADB;TGFB1;XPO1;XPO4;XPO6	21	13536	22	18107	0.0139532	0.570349
GO:0001540	amyloid-beta binding	molecular_function	6	APBA1;APBA2;APBB1;APBB2;APBB3;APOA1;APOE;BACE1;BACE2;CD74;FBXO2;GPRASP2;GSAP;ITM2B;ITM2C;LDLRAD3;LDLRAP1;LOC479600;SMIM12;DLGAP3;TGFB2;TM2D1	21	13536	22	18107	0.0139532	0.570349
GO:0070059	intrinsic apoptotic signaling pathway in response to endoplasmic reticulum stress	biological_process	9	AIFM1;ATF4;ATP2A1;BAG6;BAK1;BAX;BBC3;BRSK2;DAB2IP;DDIT3;DNAJC10;ERN1;ERN2;ERO1A;GSK3B;ITPR1;LOC102152029;MAP3K5;PML;SELENOK;TMBIM6	21	13536	23	18107	0.0465892	0.92626
GO:0043491	protein kinase B signaling	biological_process	8	AKT1;CCL2;CCL5;CD40;EP300;GAS6;IGF1;ILK;NKX3-1;PIK3C2B;PIK3CA;PTEN;RPS6KB1;RPS6KB2;SESN2;SETX;SIRT2;SOX9;TGFB1;THEM4;TMEM100	21	13536	23	18107	0.0465892	0.92626
GO:0032465	regulation of cytokinesis	biological_process	8	AURKA;AURKB;TRNAD-GUC;BBS4;BECN1;BIRC6;BRCA2;CALM3;CCP110;CETN2;FLCN;GIT1;KLHL21;LOC102155336;PDXP;PIK3C3;PIK3R4;PIN1;PLK3;PRPF40A;SDCCAG3;UVRAG	21	13536	23	18107	0.0465892	0.92626
GO:0005154	epidermal growth factor receptor binding	molecular_function	7	AGR2;ARF4;ATXN2;CBLC;EFEMP1;EGF;ERBB4;EREG;FAM83B;FER;GRB2;HBEGF;LINGO1;RNF126;SNX1;SNX2;SNX4;SOCS5;TNK2;VAV2;VAV3	21	13536	23	18107	0.0465892	0.92626
GO:0051225	spindle assembly	biological_process	8	AJUBA;CEP192;CHD4;CSNK1D;HAUS1;HAUS2;HAUS3;POLN;HAUS5;HAUS6;HAUS7;TREX2;HAUS8;HDAC3;INO80;LOC100688660;LOC102152881;MAP9;NCOR1;RCC1;RPS3;STARD9;TNKS	21	13536	23	18107	0.0465892	0.92626
GO:0071320	cellular response to cAMP	biological_process	8	AKAP6;AQP1;AQP8;AQP9;CFTR;DMTN;EP300;EZR;GPD1;HCN2;HCN4;IGFBP5;INPP5K;ITPR2;KCNQ1;PDE4D;PIK3CG;RAP1A;RAPGEF1;RAPGEF2;RAPGEF3	21	13536	23	18107	0.0465892	0.92626
GO:0017048	Rho GTPase binding	molecular_function	9	DAAM1;DAAM2;DAPK3;DIAPH1;DIAPH2;DIAPH3;DOCK11;ECT2;FMNL1;FMNL3;IQGAP3;KIF3B;LOC102153864;LOC111092837;LOC476151;LOC490877;LRRK2;PAK3;PFN1;ROCK2;VPS4A	21	13536	23	18107	0.0465892	0.92626
GO:0070888	E-box binding	molecular_function	9	ARNTL2;ARNTL;ASCL2;ATOH8;BHLHE40;BHLHE41;C17H1orf54;CIART;CLOCK;GATA3;HAND2;LOC481228;NEUROD1;PER1;PTF1A;TAL1;TCF12;TCF21;TCF3;TCF4;TFAP4;ZEB1	21	13536	24	18107	0.109806	0.92626
GO:0030890	positive regulation of B cell proliferation	biological_process	9	ADA;BST1;CARD11;CD38;CD40;CD74;CD81;CDKN1A;CHRNB2;CLCF1;IRS2;MEF2C;NCKAP1L;NFATC2;PELI1;SASH3;TCF3;TICAM1;TLR4;TNFRSF13C;VAV3	21	13536	24	18107	0.109806	0.92626
GO:0034097	response to cytokine	biological_process	6	ACP5;ALDH1A2;BCL2L1;CD274;COL3A1;DDOST;IL12RB2;JUNB;JUND;JUN;LOC111094296;MAPKAPK2;MAPKAPK3;NFKB2;PPP3CB;RELA;RELB;REL;SRF;STAT4;TMEM102	21	13536	24	18107	0.109806	0.92626
GO:0043507	positive regulation of JUN kinase activity	biological_process	14	ARHGEF5;DAB2IP;DVL2;DVL3;EDN1;EPHA4;FZD10;FZD4;FZD5;MAP3K10;MAP3K11;MAP3K4;MAP3K5;MAP3K7;PAK1;RPS3;SASH1;TAOK3;TLR6;TRAF6;ZEB2	21	13536	24	18107	0.109806	0.92626
GO:0010508	positive regulation of autophagy	biological_process	8	ATG14;DCN;FOXO1;LRRK2;MID2;MTDH;PLEKHF1;PRKAA1;RNF152;SH3BP4;SVIP;TBC1D5;TMEM59;TP53INP1;TP53INP2;TRIM21;TRIM22;TRIM65;TRIM8;UVRAG;ZC3H12A	21	13536	24	18107	0.109806	0.92626
GO:0006464	cellular protein modification process	biological_process	7	CSNK1G3;FBXW2;LOC106559510;GNMT;LOC479047;PLA1A;ADPRH;RIMKLA;RIMKLB;ST3GAL6;TSG101;TTLL10;TTLL11;TTLL12;TTLL5;TTLL7;TTL;UBA7;UBE2D3;UBE2M;UBL5;UEVLD;WDYHV1	21	13536	24	18107	0.109806	0.92626
GO:0015485	cholesterol binding	molecular_function	7	ANXA6;APOA1;APOD;ERLIN1;ERLIN2;NPC1;NPC2;OSBP2;C26H5orf52;OSBPL10;OSBPL1A;OSBPL3;OSBPL5;OSBPL7;OSBPL8;PTCH1;SCAP;SCP2;SOAT1;SOAT2;STARD3;SYP	21	13536	25	18107	0.205621	0.92626
GO:0043621	protein self-association	molecular_function	5	ACVR2A;BCL10;CCDC88C;CCL5;CNTN2;DMTN;DVL2;DYRK1A;ID1;LDB1;NKX3-1;PTH1R;RSAD2;SLC9A3R1;SVIP;TCF4;TNFAIP3;TP53;TRIM32;ZNF496;ZNF639	21	13536	25	18107	0.205621	0.92626
GO:0043967	histone H4 acetylation	biological_process	10	ACTL6A;BEND3;BRCA2;BRD8;DMAP1;ELP3;EP300;EP400;EPC1;ING3;LEF1;MORF4L2;MSL3;NAA60;NCOA1;PER1;RUVBL1;RUVBL2;TRRAP;USP22;YEATS4	21	13536	25	18107	0.205621	0.92626
GO:0045860	positive regulation of protein kinase activity	biological_process	11	ADCYAP1;CACUL1;CDK5;CENPE;CSF1;CYR61;DAB1;DDR2;EREG;GCG;LCP2;LOC111094605;LOC479761;MMD;PTK2;RAP1A;RAPGEF2;RASSF2;SNX9;TAB2;VLDLR	21	13536	25	18107	0.205621	0.92626
GO:0032868	response to insulin	biological_process	7	CRY1;MTERF2;CRY2;EGR1;EPM2AIP1;HADHA;HADH;IGFBP2;INPPL1;KHK;LEP;MTOR;OGT;PRLH;SCAP;SESN2;SIRT1;SLC27A1;SORT1;STXBP3;TSC1;VGF	21	13536	25	18107	0.205621	0.92626
GO:0052689	carboxylic ester hydrolase activity	molecular_function	6	ABHD1;ABHD4;ABHD5;ACOT7;ACOT9;CEL;CES1;CES2;ESD;FAM135A;FAM135B;LIPH;LYPLA1;LYPLA2;LYPLAL1;NCEH1;NLGN2;NLGN3;NLGN4X;PNLIPRP1;PPME1	21	13536	25	18107	0.205621	0.92626
GO:0007249	I-kappaB kinase/NF-kappaB signaling	biological_process	8	AZI2;BCL10;BCL3;HACD3;IRAK1BP1;MAP3K14;NFKB2;NFKBIL1;RELA;RELB;REL;RIPK2;RIPK3;ROCK1;ROCK2;SNIP1;TANK;TIFA;TLR8;TNIP2;TRAF6	21	13536	26	18107	0.326623	0.92626
GO:0006633	fatty acid biosynthetic process	biological_process	9	ABCD3;ACACA;ACACB;ACSF3;ACSM3;AGMO;BRCA1;CH25H;ELOVL5;ELOVL7;FASN;FAXDC2;HNF1A;LOC111092805;MCAT;MGLL;MSMO1;NDUFAB1;PLA2G1B;PRKAG1;SC5D	21	13536	26	18107	0.326623	0.92626
GO:0004713	protein tyrosine kinase activity	molecular_function	8	BAZ1B;CLK1;CLK2;CLK3;CLK4;DSTYK;DYRK1A;DYRK2;EPHB2;ERBB4;EREG;FER;FGFR1OP;FGFR4;LOC102156359;MAP2K2;MERTK;RET;RYK;TIE1;TYRO3	21	13536	26	18107	0.326623	0.92626
GO:2001244	positive regulation of intrinsic apoptotic signaling pathway	biological_process	10	BAX;BCAP31;BCL2L11;BCLAF1;CAV1;CLU;DNM1L;FIS1;CLDN15;FLCN;GSDME;LOC111097407;NKX3-1;PLAGL2;PLEKHF1;RACK1;RIPK3;S100A9;SEPT4;SIAH1;SLC9A3R1;TP53	21	13536	26	18107	0.326623	0.92626
GO:0048015	phosphatidylinositol-mediated signaling	biological_process	9	CSF1R;ERBB4;EREG;EZR;GAB2;IGF1R;INPP5F;LOC475149;OGT;PDGFRB;PI4KA;PI4KB;PIK3C2A;PIK3C2B;PIK3C2G;PIK3C3;PIK3CA;PIK3CB;PIK3CD;PLCH1;PTPN11	21	13536	26	18107	0.326623	0.92626
GO:0042169	SH2 domain binding	molecular_function	6	ARHGAP5;ARHGEF39;SIT1;CRK;CTR9;DAG1;DLC1;INPPL1;JAK2;LAT2;NLK;NUP62;IL4I1;PAG1;PTK2;PTPN6;RACK1;SH3PXD2B;SHCBP1;SQSTM1;SRC;SYNGR3;SYP	21	13536	26	18107	0.326623	0.92626
GO:0050796	regulation of insulin secretion	biological_process	11	ARL2;ARNTL;CACNA2D2;CCL5;CLOCK;ENSA;G6PC2;GCK;HNF1A;HNF4A;ICA1;LEP;LOC100686848;NKX6-1;NOS2;RFX3;RFX6;SLC16A1;SYT7;SYT9;TFAP2B	21	13536	26	18107	0.326623	0.92626
GO:0035861	site of double-strand break	cellular_component	11	APLF;ATF2;C15H16orf87;ENDOD1;LOC485120;ESCO2;HUS1;LOC489372;PARP3;PAXX;PRPF19;RAD18;RAD50;RAD51;RNF168;RNF169;RPA2;SLF1;SLF2;SMARCAD1;SMC6;VCP	21	13536	26	18107	0.326623	0.92626
GO:0045071	negative regulation of viral genome replication	biological_process	9	ADAR;BST2;C20H19orf66;CCL5;EIF2AK2;SULT6B1;FAM111A;ILF3;ISG15;LOC488947;LTF;MAVS;MX1;OAS1;OAS3;OASL;PROX1;RNASEL;RSAD2;SLPI;SRPK1;SRPK2	21	13536	27	18107	0.459035	0.92626
GO:0050853	B cell receptor signaling pathway	biological_process	8	ABL1;BCAR1;CD19;CD38;KLHL6;LAT2;LOC488622;LYN;MAPK1;MEF2C;MNDA;NCKAP1L;NFATC2;PLCG2;PLEKHA1;PRKCB;PTPN6;RFTN1;SYK;VAV3;ZAP70	21	13536	27	18107	0.459035	0.92626
GO:0030687	preribosome, large subunit precursor	cellular_component	9	BOP1;CCDC86;EBNA1BP2;EIF6;FTSJ3;LAS1L;MAK16;MRTO4;NSA2;PES1;PPAN;RPF1;RPLP0;RPLP2;RRP15;RRP1B;RRS1;WDR12;WDR37;WDR74;ZNF622	21	13536	27	18107	0.459035	0.92626
GO:0007628	adult walking behavior	biological_process	6	ABHD12;CACNA1A;CACNB4;CEND1;CLN8;CNTN2;CTNS;DAB1;DRD1;EFNB3;EPHA4;FXN;GLRB;HEXA;HIPK2;HTRA2;MAPT;NPC1;OXR1;SPTBN4;UCHL1	21	13536	27	18107	0.459035	0.92626
GO:0043312	neutrophil degranulation	biological_process	9	ANXA3;ARMC8;ATP6V1D;B4GALT1;C6H16orf62;CD177;CD55;COMMD9;CPNE1;RBM12;GMFG;GNS;GYG1;IMPDH2;LOC488622;MNDA;NCKAP1L;PDAP1;PLEKHO2;STXBP2;STXBP3;VCL	21	13536	27	18107	0.459035	0.92626
GO:0007517	muscle organ development	biological_process	8	ALX4;CHKB;COPRS;CRYAB;ETV1;FXR1;JPH1;LAMA5;LMNA;LOC111096734;LOC102156677;LOC102156915;MSX1;NRG1;PRR14L;PRR14;SGCB;SGCD;SGCZ;SMTN;SRI;ZBTB42	21	13536	28	18107	0.587989	0.92626
GO:0030326	embryonic limb morphogenesis	biological_process	9	ALX1;BMP7;CYP26B1;DKK1;FBN2;FGFR1;GJA5;GREM1;HNF1A;HOXA10;HOXC10;HOXD11;HOXD10;LEF1;LOC111095863;MBNL1;MEGF8;PBX1;PRRX1;PSEN1;PTCH1;WDR19;LOC111095293	21	13536	28	18107	0.587989	0.92626
GO:0050873	brown fat cell differentiation	biological_process	8	ALDH6A1;ARL4A;BNIP3;CEBPA;CUX1;SH2B2;EBF2;ERO1A;ITGA6;LAMA4;LAMB3;LOC102153796;LRG1;METRNL;NUDT7;PLAC8;PRDM16;PTGS2;RARRES2;RGS2;SLC2A4;ZNF516	21	13536	28	18107	0.587989	0.92626
GO:0002062	chondrocyte differentiation	biological_process	7	BMP2;BMP4;BMPR1A;CREB3L2;FGFR1;GLI2;IFT80;LOC102151229;LOC449531;MAPK14;MEF2C;MEF2D;MUSTN1;NFIB;NOV;OSR1;OSR2;PTH1R;SIX2;SNX19;TGFB1	21	13536	29	18107	0.701928	0.92626
GO:0030183	B cell differentiation	biological_process	9	CD40LG;CEBPG;CLCF1;DCAF1;DCLRE1C;EP300;FZD9;GON4L;HDAC9;HHEX;JAK3;MSH2;NHEJ1;NTRK1;ONECUT1;PIK3R1;PTPN2;RBPJ;SP3;TPD52;ZBTB1	21	13536	29	18107	0.701928	0.92626
GO:0009967	positive regulation of signal transduction	biological_process	8	AFAP1L2;ARHGAP6;BLNK;CDKN2AIP;CRK;CUX1;SH2B2;EIF2A;EPS8;GATA3;GRB14;GRB2;HDAC6;LDLRAP1;LOC489534;MAPK8IP1;SH2B1;SH2B3;SH3BGRL;SH3BP2;SKAP2;SLA	21	13536	30	18107	0.794596	0.971631
GO:0043588	skin development	biological_process	8	ABCB6;ADAMTS2;ARRDC3;ATP8A2;COL3A1;COL5A1;COL5A2;DHCR24;GPR89A;ITGA3;ITGA6;ITGB4;LOC102153796;LOC111094296;PKD1;PTCH2;PTGES3;SUFU;TCF15;TFAP2B;WDR48	21	13536	30	18107	0.794596	0.971631
GO:0006368	transcription elongation from RNA polymerase II promoter	biological_process	10	AFF4;CDC73;ELL2;ELL3;ELL;ELOA;ELOB;ELP3;ENY2;ERCC2;GTF2H3;LOC102157048;LOC111092487;LOC478310;OSBPL2;ADRM1;PAF1;RTF1;SETD2;SUPT4H1;SUPT5H;THOC7	21	13536	31	18107	0.864755	0.996715
GO:0005160	transforming growth factor beta receptor binding	molecular_function	7	BMP1;BMP2;BMP3;BMP4;BMP6;C37H2orf88;GDF11;GDF15;GDF6;GDF9;INHBA;INHBB;LOC100855618;LOC607768;LRG1;RASL11B;SMAD3;SMURF2;TGFB2;TGFBRAP1;USP15	21	13536	33	18107	0.948207	0.998079
GO:0032729	positive regulation of interferon-gamma production	biological_process	8	BCL3;CD14;CD3E;FADD;FZD5;HAVCR1;HRAS;IL12RB2;IL18R1;IL18;IL23A;IRF8;ISL1;LOC484907;PDE4B;PDE4D;RIPK2;SASH3;SLC11A1;TICAM2;TLR4	21	13536	36	18107	0.990605	1
GO:0007569	cell aging	biological_process	5	BRCA2;DNAJA3;KCNMB4;LOC102151229;LOC102153535;LOC102153756;LOC102155086;LOC102155379;LOC102156686;LOC106557917;LOC111093862;LOC111094798;MNT;MORC3;NOX4;NUP62;IL4I1;PDCD4;PRELP;SOD1;WRN;ZMIZ1	21	13536	53	18107	1	1
GO:0051321	meiotic cell cycle	biological_process	4	BUB3;CDK2;KLHDC3;LOC102151191;LOC102153058;LOC102153836;LOC102154125;LOC102155336;LOC106557691;LOC106560206;CCDC34;LOC111095260;LOC111096315;LOC111096743;LOC111098412;MND1;MRE11;NBN;NR2C2;PPP2CA;STAG2;TUBGCP2	21	13536	99	18107	1	1
GO:0035145	exon-exon junction complex	cellular_component	11	ACIN1;CASC3;EIF4A3;LOC102152493;LOC491346;MAGOHB;MAGOH;PNN;PYM1;R3HCC1L;RBM8A;SMG6;SRSF1;TDRD3;THRAP3;UHMK1;UPF1;UPF2;UPF3A;UPF3B	20	13536	20	18107	0.00296031	0.217747
GO:0070584	mitochondrion morphogenesis	biological_process	6	BAX;BCL2L1;COL4A3BP;DNM1L;FIS1;CLDN15;LOC100855532;LOC111092250;LOC484444;MFF;MTM1;MYH14;NDUFS6;NUBPL;PANK2;PID1;PNPT1;POLDIP2;SLIRP;SSBP1;SUPV3L1	20	13536	21	18107	0.0179231	0.661303
GO:0005912	adherens junction	cellular_component	5	AHI1;CDH5;CTNNA2;CXADR;CYTH3;DLL1;EPB41L5;ESAM;FAM129B;JAG1;MAGI1;MYO1E;NF2;NOTCH1;PKP2;RND1;SYNM;TBCD;TMEM47;VCL	20	13536	21	18107	0.0179231	0.661303
GO:0030215	semaphorin receptor binding	molecular_function	6	SEMA3A;SEMA3B;SEMA3C;SEMA3D;SEMA3E;SEMA3F;SEMA3G;SEMA4A;SEMA4C;SEMA4D;SEMA4F;SEMA5A;SEMA5B;SEMA6A;SEMA6B;SEMA6C;SEMA6D;SEMA7A;SH3BGRL3;TWNK;SEMA4G	20	13536	21	18107	0.0179231	0.661303
GO:0055038	recycling endosome membrane	cellular_component	11	ARF6;CLIP3;EHD2;EHD3;EHD4;MICALL1;NDRG1;PACSIN2;RAB11B;RAB11FIP4;RAB13;RAB17;RAB8A;RAP2A;RAP2B;RAP2C;SCAMP1;SCAMP2;SCAMP5;SLC9A6	20	13536	22	18107	0.0576216	0.92626
GO:0003887	DNA-directed DNA polymerase activity	molecular_function	8	HAUS3;POLN;LOC102155597;MYBBP1A;POLA1;POLA2;POLB;POLD1;POLD2;POLD4;POLE2;POLE3;POLE4;POLE;POLG;POLH;POLK;POLL;POLQ;PRIMPOL;REV3L	20	13536	22	18107	0.0576216	0.92626
GO:0048278	vesicle docking	biological_process	6	BVES;CAV2;CEP83;EXOC5;NDRG4;STX10;STX11;STX16;STX17;STX19;STX1A;STX1B;STX2;STX3;STX4;STX5;STX6;STX7;STX8;TSNARE1	20	13536	22	18107	0.0576216	0.92626
GO:0016575	histone deacetylation	biological_process	9	BRMS1L;BRMS1;HDAC10;HDAC11;HDAC2;HDAC5;HDAC6;HDAC9;HOPX;MBD3;MORF4L2;MSL3;MTA2;NACC2;PHB;PRDM5;SIN3B;SUDS3;TBL1XR1;TBL1X	20	13536	22	18107	0.0576216	0.92626
GO:0001974	blood vessel remodeling	biological_process	6	ACVR2B;ACVRL1;ATG5;BAK1;BAX;BMPR2;CBS;DLL4;EPAS1;FOXC2;HOXA3;HSF4;JAG1;LIF;LOC484790;MEF2C;NOS3;RBPJ;SEMA3C;TGFB2	20	13536	22	18107	0.0576216	0.92626
GO:0001958	endochondral ossification	biological_process	7	ALPL;BMP4;BMP6;CBS;COL13A1;COL1A1;CSGALNACT1;FGF18;IMPAD1;INPPL1;LOC102151229;LOC449531;MEF2C;MEF2D;MMP13;MMP14;MMP16;NAB1;NAB2;PEX7	20	13536	23	18107	0.131171	0.92626
GO:0006730	one-carbon metabolic process	biological_process	5	AHCYL1;AHCYL2;AHCY;ALDH1L2;CA12;CA13;CA2;CA4;CA5B;CA9;FPGS;GNMT;LOC608422;MAT1A;MAT2A;MTHFD1L;MTHFD1;MTHFD2L;MTHFD2;MTHFR	20	13536	23	18107	0.131171	0.92626
GO:0032956	regulation of actin cytoskeleton organization	biological_process	7	ABL1;ARHGEF19;CCDC88A;CDK5R1;CELSR1;CLASP2;CRK;DMTN;EFNA5;EPHA3;EPHA5;FSCN1;FZD10;GPM6B;ITGB3;RICTOR;ROCK2;TGFB2;TRIOBP;TSC1	20	13536	23	18107	0.131171	0.92626
GO:0051017	actin filament bundle assembly	biological_process	9	ACTN1;ACTN4;ADD2;AIF1;BAIAP2L1;BAIAP2;CORO1B;DMTN;DPYSL3;EPS8;EZR;FSCN1;GAS7;LCP1;LIMA1;MARCKS;MYO1B;RHOD;SHROOM1;SWAP70	20	13536	23	18107	0.131171	0.92626
GO:0032580	Golgi cisterna membrane	cellular_component	12	B4GALNT3;B4GALNT4;B4GALT1;CHPF;CHSY1;CHSY3;CSGALNACT1;CSGALNACT2;FUT10;FUT11;FUT4;FUT5;LOC111091392;FUT8;GPR89A;LOC100683739;MIR671;RAB21;ST3GAL3;TMEM115;YIPF5	20	13536	23	18107	0.131171	0.92626
GO:0030866	cortical actin cytoskeleton organization	biological_process	7	ARF6;CALR;CAVIN3;DLG1;EHD2;EPB41L1;EPB41L3;EPB41;FMNL1;IKBKB;LLGL1;LLGL2;NCKAP1L;PLEK;RAB13;RHOQ;ROCK1;ROCK2;STRIP1;TLN1	20	13536	23	18107	0.131171	0.92626
GO:0005778	peroxisomal membrane	cellular_component	12	ABCD3;ACOX1;AGPS;DAO;GNPAT;HMGCR;IMPDH2;MAP2K2;MAVS;PEX10;PEX14;PEX19;PEX1;PEX5;PNPLA8;PXMP2;PXMP4;RAB8B;SYT7;TTC1	20	13536	24	18107	0.237997	0.92626
GO:0060325	face morphogenesis	biological_process	7	ANKRD11;ASPH;COL1A1;CRISPLD1;CRISPLD2;CSRNP1;DKK1;LEF1;LRP6;MMP2;MSX1;PDGFRA;PLEKHA1;PTPN11;RAB3GAP1;RRAS;SGPL1;TGFB2;TGFB3;TIPARP	20	13536	24	18107	0.237997	0.92626
GO:0043204	perikaryon	cellular_component	7	AZIN2;CDK5;CNTNAP2;CTNND2;ENO2;GRIA3;HDAC6;KCNE3;LRRK2;MAPK9;NEURL1;NSMF;RACK1;RUFY3;SHTN1;SIRT2;SLC5A7;TMEM100;TOP1;ZPR1	20	13536	24	18107	0.237997	0.92626
GO:0001103	RNA polymerase II repressing transcription factor binding	molecular_function	7	BBS10;BBS2;BBS4;CCNA2;BBS7;CHD4;DMAP1;GATA6;GTF2A2;HDAC2;MIXL1;MKKS;LOC102153017;MTA1;MTA2;PPARA;RBBP8;RBPJ;STAT3;TBP;TCERG1;TCF7L2	20	13536	24	18107	0.237997	0.92626
GO:0030315	T-tubule	cellular_component	7	AHNAK2;AHNAK;ATP2B4;BIN1;LOC111091071;C38H1orf226;CAMK2D;CAPN3;DYSF;KCND2;KCNJ11;KCNN2;LOC478773;LOC484444;LOC488636;LOC490881;LOC609484;NOS1;PPP3CB;SCN1B;SRI	20	13536	24	18107	0.237997	0.92626
GO:0050681	androgen receptor binding	molecular_function	9	CALR;DAXX;DDX5;EP300;KDM1A;KDM3A;KDM4C;NSD1;PARK7;PKN1;PRKCB;PRMT2;PRPF6;RNF14;RNF6;SMARCA4;TCF21;TGFB1I1;TRIM68;WIPI1	20	13536	25	18107	0.3675	0.92626
GO:0031966	mitochondrial membrane	cellular_component	12	ACAD11;CLU;COQ8B;IKBKE;LOC102154691;LOC489515;NAT8L;NDUFAF4;PLN;RNF144B;SFXN3;SLC25A10;SLC25A30;SLC25A32;SLC25A33;SLC9B2;STMP1;TAZ;TMBIM6;UCP2	20	13536	25	18107	0.3675	0.92626
GO:0048661	positive regulation of smooth muscle cell proliferation	biological_process	6	AIF1;BMP4;CALCRL;CAMK2D;CCL5;CDH13;EDN1;EREG;HBEGF;HMOX1;IGF1;IL6R;IL6;NOTCH3;NR4A3;PDGFB;PDGFRB;S1PR1;STAT4;SULF1	20	13536	25	18107	0.3675	0.92626
GO:0050890	cognition	biological_process	7	CBR3;CHL1;CHMP2B;CHRNA4;DGCR2;DLA-DRA;DOPEY2;GPR155;HOXA1;KBTBD2;LOC106559695;LINS1;LOC106559694;RP9;METTL23;NF1;PTCHD1;SHROOM4;SLC1A4;SOBP;ST3GAL4;TUSC3	20	13536	25	18107	0.3675	0.92626
GO:0008138	protein tyrosine/serine/threonine phosphatase activity	molecular_function	9	CDC14A;CDC14B;CDKN3;DUSP11;DUSP12;DUSP22;DUSP26;DUSP3;EPM2A;LOC102151298;LOC106558366;PTEN;PTP4A3;PTPDC1;PTPMT1;RNGTT;SSH1;SSH2;SSH3;TMEM120A;STYXL1	20	13536	26	18107	0.503757	0.92626
GO:0048666	neuron development	biological_process	10	ATP8A2;CCSAP;EN1;FIG4;FXR1;HS6ST1;HTRA2;LIF;MAPK9;MTMR2;NEUROD1;NR2F6;PBX3;PSEN1;SECISBP2;SOD2;TENM3;TENM4;THOC2;ZFP91;CNTF	20	13536	27	18107	0.631533	0.92626
GO:0016358	dendrite development	biological_process	7	ABI2;APP;BAIAP2;BBS1;BBS4;DAB1;GRIP1;IGSF9;LOC111097376;LST1;MAP1B;MECP2;NRP1;PAK3;PPP1R9B;PRKG1;RELN;SCARF1;SS18L1;TRAPPC4	20	13536	27	18107	0.631533	0.92626
GO:0019933	cAMP-mediated signaling	biological_process	10	ADCY2;ADCY4;ADCY7;ADCYAP1;DGKQ;EIF4EBP2;GAL;GHRHR;GLP1R;LOC111090913;NDUFS4;NPR3;PCLO;PDE2A;PDE3A;PDE4D;RAPGEF2;RIMS2;SLC9A3R1;SOX9	20	13536	28	18107	0.740394	0.92626
GO:0030216	keratinocyte differentiation	biological_process	9	ANXA1;CASP3;CLIC4;DSP;EREG;EVPL;INTU;LATS1;LATS2;MAP2K1;MED1;NOTCH1;RABGGTA;TGM1;RBPJ;SAV1;ST14;STK4;TSG101;TXNIP;YAP1	20	13536	29	18107	0.825874	0.972031
GO:0050729	positive regulation of inflammatory response	biological_process	8	CCL23;CCL24;CCL7;CCL8;CD47;CLOCK;CX3CL1;GPRC5B;HYAL2;IL17RB;IL1RL1;LOC480601;LOC480603;LOC490969;PTGER4;S100A9;TLR2;TLR3;TNFRSF1A;TWF2;TLR9	20	13536	29	18107	0.825874	0.972031
GO:0009566	fertilization	biological_process	5	AAAS;APOB;BAX;BBS1;BCL2L1;CLIC4;EHMT2;LOC488636;LOC489235;MEIOB;NECTIN2;NECTIN3;NR2F2;OOEP;REC8;SPINK2;SPTBN4;SYCP2;TDRKH;UBE2Q1	20	13536	31	18107	0.931476	0.99779
GO:0008009	chemokine activity	molecular_function	8	CCL17;CCL20;CCL23;CCL24;CCL25;CCL27;LOC111098084;CCL2;CCL5;CCL7;CCL8;CX3CL1;CXCL10;CXCL12;CXCL14;CXCL16;CXCL8;LOC102154078;LOC106557449;LOC480601;LOC480603	20	13536	33	18107	0.976945	1
GO:0005882	intermediate filament	cellular_component	11	BFSP1;DES;DSP;GFAP;GJA1;IFFO1;IFFO2;KRT17;KRT18;KRT19;KRT222;KRT23;MNS1;NES;PKP2;SLC1A4;SYNC;SYNM;TLK2;VIM	20	13536	37	18107	0.99822	1
GO:0016573	histone acetylation	biological_process	9	ATF2;CLOCK;CREBBP;HNF1A;ING4;KAT5;KAT6B;KAT7;MBD3;MEAF6;MECP2;METTL8;MRGBP;NCOA2;TADA2A;TADA2B;TAF5;TRRAP;WDR75	19	13536	19	18107	0.00396138	0.258068
GO:0030488	tRNA methylation	biological_process	13	ALKBH8;FTSJ1;LCMT2;LOC102153444;METTL1;METTL2A;NSUN2;TARBP1;TRDMT1;TRMO;TRMT10A;TRMT112;TRMT11;TRMT13;TRMT44;TRMT5;TRMT61A;TRMT6;WDR4	19	13536	19	18107	0.00396138	0.258068
GO:0035329	hippo signaling	biological_process	8	AMOTL1;AMOTL2;AMOT;DCHS1;FAT4;LATS1;LATS2;MOB1A;MOB1B;PJA2;SAV1;STK3;STK4;TEAD1;TEAD2;TEAD3;TEAD4;WWTR1;YAP1	19	13536	19	18107	0.00396138	0.258068
GO:0005763	mitochondrial small ribosomal subunit	cellular_component	13	DAP3;DNAJC9;MRPS16;LOC100688849;MRPL42;MRPS11;MRPS14;MRPS15;MRPS17;MRPS18A;MRPS18C;MRPS22;MRPS26;MRPS28;MRPS2;MRPS31;MRPS35;MRPS5;MRPS7;MRPS9	19	13536	19	18107	0.00396138	0.258068
GO:0005669	transcription factor TFIID complex	cellular_component	10	AK6;TAF9;EDF1;ERCC1;ERCC4;TAF10;TAF11;TAF12;TAF13;TAF1;TAF2;TAF3;TAF4B;TAF4;TAF5;TAF6;TAF7;TAF8;TBP;TP53	19	13536	20	18107	0.0229819	0.727739
GO:0031492	nucleosomal DNA binding	molecular_function	6	ACTL6A;CHD4;H2AFZ;HDAC2;HMGN2;HMGN3;LOC111090709;BOLA1;LOC481514;LOC483164;LOC483172;MBD3;MTA2;RBBP4;RCC1;SMARCA4;SMARCB1;SMARCC1;SMARCC2;SMARCD2;SMARCE1	19	13536	20	18107	0.0229819	0.727739
GO:0033137	negative regulation of peptidyl-serine phosphorylation	biological_process	10	BAK1;BAX;BDKRB2;CAV1;DKK1;DMD;DMTN;HGF;INPP5J;INPP5K;MLXIPL;NCK1;NCK2;PAQR3;PDE4D;PPM1F;RACK1;RASSF2;SMAD7	19	13536	20	18107	0.0229819	0.727739
GO:2001238	positive regulation of extrinsic apoptotic signaling pathway	biological_process	10	AGT;BCL10;BCL2L14;BID;CAV1;CYLD;DEDD2;G0S2;HYAL2;ITM2C;LOC102152029;PAK2;PML;RBCK1;RIPK1;TNFRSF12A;TNFSF10;TNFSF12;WWOX	19	13536	20	18107	0.0229819	0.727739
GO:2000134	negative regulation of G1/S transition of mitotic cell cycle	biological_process	10	AVIL;CTDSP2;BRD7;CDC73;CDK2AP2;CDKN2B;CTDSP1;DACT1;E2F7;EZH2;FBXO7;FHL1;JADE1;KANK2;LOC100855640;PKD2;PTEN;RB1;SMARCA4;ZNF655	19	13536	20	18107	0.0229819	0.727739
GO:0051879	Hsp90 protein binding	molecular_function	6	AHR;ARNTL;CDC37;CHORDC1;ERN1;HDAC6;HIF1A;KPNB1;NOD2;NUP62;IL4I1;PACRG;PPID;RPS3;STUB1;TELO2;TTC4;UNC45A;UNC45B;USP19	19	13536	20	18107	0.0229819	0.727739
GO:0042056	chemoattractant activity	molecular_function	3	ALKBH1;BMP4;CCL5;CXCL12;FGF7;HGF;HMGB1;LGALS3;LOC102153164;LOC102156046;LOC111089962;LOC476879;LOC111090369;NTF3;PDGFB;SAA1;SCG2;VEGFB;VEGFC;VEGFD	19	13536	20	18107	0.0229819	0.727739
GO:0006487	protein N-linked glycosylation	biological_process	9	ALG12;ALG5;ALG6;ALG8;B4GALT1;B4GALT7;CCDC126;DOLPP1;DPAGT1;DPM1;GORASP1;MGAT3;MGAT4A;MGAT5;MOGS;PGM3;RPN2;TMEM165;TUSC3	19	13536	20	18107	0.0229819	0.727739
GO:0032435	negative regulation of proteasomal ubiquitin-dependent protein catabolic process	biological_process	12	AK6;TAF9;BAG5;BAG6;CCAR2;FHIT;GIPC1;HSP90AB1;KLHL40;LOC102156762;LOC609094;LOC609558;MTM1;N4BP1;PARK7;SENP1;SMARCC1;TLK2;UBXN1;WAC	19	13536	20	18107	0.0229819	0.727739
GO:0070979	protein K11-linked ubiquitination	biological_process	12	ANAPC10;ANAPC4;ANAPC5;ANAPC7;CDC16;CDC23;CDC26;CDC27;PRKN;UBE2A;UBE2B;UBE2C;UBE2D3;UBE2E2;UBE2E3;UBE2H;UBE2L3;UBE2S;UBE2T	19	13536	20	18107	0.0229819	0.727739
GO:0036459	thiol-dependent ubiquitinyl hydrolase activity	molecular_function	5	ALG13;BRCC3;MINDY4;OTUD6B;UCHL3;USP18;USP24;USP25;USP27X;USP28;USP30;USP35;USP39;USP43;USP45;USP53;USP54;USP9X;WDR20	19	13536	20	18107	0.0229819	0.727739
GO:0016925	protein sumoylation	biological_process	10	CBX4;EYA1;IFIH1;LOC474539;NFATC2IP;PIAS1;PIAS3;PIAS4;SAE1;SEH1L;ST8SIA5;PIAS2;STAG2;SUMO1;SUMO2;SUMO3;TRIM28;TRPM4;UBA2;UBE2I	19	13536	20	18107	0.0229819	0.727739
GO:0046856	phosphatidylinositol dephosphorylation	biological_process	10	INPP5A;INPP5B;INPP5D;INPP5E;INPP5J;INPP5K;INPPL1;MTM1;MTMR1;MTMR2;MTMR3;MTMR6;MTMR7;OCRL;PIP4P1;PIP4P2;PTEN;SYNJ1;SYNJ2	19	13536	20	18107	0.0229819	0.727739
GO:0043531	ADP binding	molecular_function	9	ABCG1;APAF1;CHORDC1;COQ8A;ERN1;GCLC;MSH2;MSH6;MYH10;MYH9;MYO18A;MYO3A;MYO7A;MYO9B;PPP5C;PRKAG1;PRKAG2;LOC106559811;RUVBL2;TAP1	19	13536	20	18107	0.0229819	0.727739
GO:0007052	mitotic spindle organization	biological_process	8	AURKA;AURKB;TRNAD-GUC;CEP126;CLASP1;CLASP2;DCTN2;EML1;INTS13;LOC102155336;NDC80;PCNT;PLK2;RCC1;SMC3;SPC25;STIL;STMN1;SYNE4;WDR62	19	13536	20	18107	0.0229819	0.727739
GO:0006904	vesicle docking involved in exocytosis	biological_process	7	CFTR;EXOC4;EXOC6B;EXOC6;PLEK;RAB13;RAB8A;RAB8B;SCFD1;SCFD2;STXBP1;STXBP2;STXBP3;SYTL2;VPS11;VPS18;VPS33A;VPS33B;VPS45	19	13536	21	18107	0.0710404	0.92626
GO:0046540	U4/U6 x U5 tri-snRNP complex	cellular_component	9	LOC100685900;LSM2;LSM3;LSM5;LSM6;LSM8;PPIH;PRPF31;PRPF3;PRPF4;PRPF6;SART1;SART3;SNRPD2;SNRPE;SNRPN;SNURF;SNU13;TXNL4B;ZMAT2	19	13536	21	18107	0.0710404	0.92626
GO:0005680	anaphase-promoting complex	cellular_component	9	ANAPC10;ANAPC11;ANAPC15;ANAPC16;ANAPC1;ANAPC2;ANAPC4;ANAPC5;ANAPC7;CACUL1;CDC16;CDC20;CDC23;CDC26;CDC27;FZR1;MAD2L2;UBE2C;UBE2S	19	13536	21	18107	0.0710404	0.92626
GO:0071363	cellular response to growth factor stimulus	biological_process	7	CPNE3;CTNNB1;EMD;ERBB2;GAS6;HTRA2;INSR;KLF4;LOC111091360;LOC490969;NOS1;PDGFB;RACK1;RIPK1;RPS6KB1;SHC1;SPARC;TWF2;TLR9;URI1	19	13536	21	18107	0.0710404	0.92626
GO:0030177	positive regulation of Wnt signaling pathway	biological_process	10	ATP6AP2;ATP6V0C;ATP6V1C2;CDC73;CSNK2A1;DACT1;DEPDC1B;DISC1;HHEX;KANK1;LGR6;MACF1;PPM1A;SMARCA4;SPIN1;SULF1;TLR2;ZEB2;ZRANB1	19	13536	21	18107	0.0710404	0.92626
GO:0030992	intraciliary transport particle B	cellular_component	6	CLUAP1;HSPB11;IFT172;IFT20;IFT22;IFT27;IFT46;IFT52;IFT57;IFT74;IFT80;IFT81;RABL2B;TRAF3IP1;TRIM59;TTC26;TTC30A;TTC30B;UBXN10	19	13536	21	18107	0.0710404	0.92626
GO:0000278	mitotic cell cycle	biological_process	6	AZI2;CDH13;CEP250;CNTRL;FER;NEK4;PAK1;PAK2;PAK3;PAK4;PHF13;PRDM5;RNF2;STK24;STK26;TFDP1;TFDP2;USP3;XRCC2	19	13536	21	18107	0.0710404	0.92626
GO:0072593	reactive oxygen species metabolic process	biological_process	5	ATPIF1;BNIP3;CTGF;CYR61;DDIT4;GLS2;LRRK2;NDUFAF2;NDUFS1;NDUFS3;NDUFS4;NNT;P2RX7;PDGFB;PDK4;PLA2R1;PRDX4;RFK;VAV1	19	13536	21	18107	0.0710404	0.92626
GO:0042149	cellular response to glucose starvation	biological_process	9	ASNS;ATF4;ATG14;BHLHA15;CPEB4;EIF2AK3;HIGD1A;HSPA5;IMPACT;MTMR3;NFE2L2;NUAK2;PIK3C3;PIK3R4;PRKAA1;PRKAA2;RRP8;TBL2;TP53	19	13536	21	18107	0.0710404	0.92626
GO:0043015	gamma-tubulin binding	molecular_function	7	B9D2;BLOC1S2;BRCA2;BRSK1;CEP57L1;CEP57;FEZ1;LOC111097612;TUBGCP6;MARK4;NDN;NDRG1;PDE4B;RAB11FIP5;RAD51D;TUBGCP2;TUBGCP3;TUBGCP4;TUBGCP5;WASHC1	19	13536	21	18107	0.0710404	0.92626
GO:0051973	positive regulation of telomerase activity	biological_process	11	AURKB;TRNAD-GUC;CTNNB1;GREM1;GRHL2;HMBOX1;KLF4;LOC111091360;MAP3K4;MAPK15;MAPK1;MAPKAPK5;NEK2;NEK7;PKIB;PNKP;POT1;STN1;TNKS;WRAP53	19	13536	21	18107	0.0710404	0.92626
GO:0035987	endodermal cell differentiation	biological_process	7	COL6A1;COL7A1;COL8A1;FN1;HSBP1;INHBA;ITGA5;ITGA7;ITGAV;ITGB2;LAMA3;LAMB1;LAMB3;MIXL1;MMP14;MMP15;MMP2;MMP9;VTN	19	13536	21	18107	0.0710404	0.92626
GO:0032781	positive regulation of ATPase activity	biological_process	14	ABCA7;AHSA1;ALDOB;ATP1B1;ATP1B2;ATP1B3;CHTOP;DNAJB11;DNAJB1;DNAJB6;DNAJC10;DNAJC24;DNAJC9;MRPS16;LOC100684448;LOC102151313;LOC106557472;LOC610310;MYL4;PFN1;TOR1AIP1	19	13536	22	18107	0.156026	0.92626
GO:0005385	zinc ion transmembrane transporter activity	molecular_function	11	LOC100856617;SLC11A2;SLC30A10;SLC30A1;SLC30A2;SLC30A3;SLC30A4;SLC30A5;SLC30A6;SLC30A7;SLC30A8;SLC39A10;SLC39A11;SLC39A13;SLC39A1;SLC39A3;SLC39A4;SLC39A6;SLC39A8	19	13536	22	18107	0.156026	0.92626
GO:0045773	positive regulation of axon extension	biological_process	10	EP300;FN1;GOLGA4;GSK3B;ISLR2;LIMK1;MACF1;MAP1B;MAPT;NRG1;NTN1;RAB11A;RUFY3;SEMA7A;SHTN1;SRF;TNFRSF12A;TRPV2;TWF2;TLR9	19	13536	22	18107	0.156026	0.92626
GO:0061098	positive regulation of protein tyrosine kinase activity	biological_process	11	ABI1;ACE;AGT;CCL5;CSF1R;DOK7;DVL2;ERCC6;GAS6;GPRC5B;GREM1;HSPH1;NRG1;PAK2;PDGFB;PTPN1;RELN;SRCIN1;UNC119	19	13536	22	18107	0.156026	0.92626
GO:0000060	protein import into nucleus, translocation	biological_process	7	AKT1;ARNTL;BCL3;CEP57;IPO4;TM9SF1;IPO5;KPNB1;NFKBIA;NUTF2;PHB2;POLA2;RANBP6;RAN;RBM22;SEC61B;SLC11A1;TGFB1;TNPO1;TNPO2	19	13536	23	18107	0.274091	0.92626
GO:0051209	release of sequestered calcium ion into cytosol	biological_process	14	DDIT3;ERO1A;HTR2A;IBTK;ITPR1;ITPR2;JPH3;LOC102153142;LOC610874;P2RX7;PKD2;PLCG2;PRKCE;RASA3;RYR2;RYR3;TPC3;TPCN1;TPCN2	19	13536	23	18107	0.274091	0.92626
GO:0051402	neuron apoptotic process	biological_process	9	AIFM1;APP;ATN1;BAX;BCL2L1;CASP3;CASP7;CDK5;DIABLO;FAM162A;GAPDH;LIG4;LOC106559694;RP9;LOC478773;NAE1;PIGT;POLB;PSEN1;XIAP	19	13536	23	18107	0.274091	0.92626
GO:0007528	neuromuscular junction development	biological_process	6	AFG3L2;ALS2;CACNA2D2;CACNB1;CACNB2;CACNB3;CACNB4;COL4A1;COL4A5;ERBB2;LAMB2;LRRK2;NEDD4;NTRK2;P2RX2;PDZRN3;TNC;UNC13A;UNC13B	19	13536	23	18107	0.274091	0.92626
GO:0048705	skeletal system morphogenesis	biological_process	8	ACVR2B;ANKRD11;CSRNP1;FAM101A;FMN1;HOXD8;HYAL2;NLE1;P2RX7;PLEKHA1;PSEN1;RFLNB;VPS53;RYK;SGPL1;TCF15;TIPARP;WDR48;WWOX;ZFAND5	19	13536	23	18107	0.274091	0.92626
GO:0001569	branching involved in blood vessel morphogenesis	biological_process	8	ACVR1;COL4A1;CTNNB1;DLL4;EDN1;EDNRA;FOXC2;GNA13;LEF1;NFATC4;NRARP;NRP1;PITX2;PLXND1;SEMA3E;SRF;STK4;TBX20;TGFBR2	19	13536	23	18107	0.274091	0.92626
GO:0000794	condensed nuclear chromosome	cellular_component	12	ADD3;BRD4;CDX2;CHEK1;CHMP1A;DNMT3L;KIFAP3;LOC489372;LRPPRC;NEK2;NOL6;P3H4;RAD50;RAD51C;RAD51;RCC1;RRS1;SUN2;TOPBP1	19	13536	23	18107	0.274091	0.92626
GO:0072332	intrinsic apoptotic signaling pathway by p53 class mediator	biological_process	9	BAX;DDX5;E2F1;FHIT;HINT1;PDK2;PERP;PPP1R13B;RRP8;STK11;TP53BP2;WWOX;ZMAT1;ZMAT3;ZMAT4;ZNF346;ZNF385A;ZNF385B;ZNF385D	19	13536	24	18107	0.411246	0.92626
GO:0030217	T cell differentiation	biological_process	9	CD4;DLL4;EGR1;IL7R;KIT;LEPR;LEP;LFNG;LOC102151229;LOC449531;NHEJ1;PATZ1;LOC106557811;PKNOX1;PPP3CB;PTPN22;PTPN2;SOX4;SP3;VAV1	19	13536	24	18107	0.411246	0.92626
GO:0043687	post-translational protein modification	biological_process	8	BTBD6;CHML;OPN3;CUL5;DCUN1D1;DDA1;FAM20C;FBXL18;FBXL8;FBXO21;FBXO41;FBXO44;FBXW12;FBXW2;LOC106559510;FEM1A;KLHL11;LRR1;STT3A;STT3B;UCHL3	19	13536	24	18107	0.411246	0.92626
GO:0043029	T cell homeostasis	biological_process	6	ARHGEF39;SIT1;BCL2L11;CASP3;CCNB2;CORO1A;FADD;JAK3;LOC490969;NCKAP1L;P2RX7;PPP2R3C;PPP3CB;RC3H1;RC3H2;RIPK3;SLC39A3;SLC46A2;SPNS2;ZC3H8	19	13536	24	18107	0.411246	0.92626
GO:0008625	extrinsic apoptotic signaling pathway via death domain receptors	biological_process	9	BAD;BAG3;BAX;BEX3;BLOC1S2;CASP8AP2;CASP8;DAB2IP;DAPK1;DDX47;DEDD2;DEDD;FAS;KIAA0141;LOC609235;NF1;PIK3R1;SORT1;TNFRSF1A	19	13536	25	18107	0.549774	0.92626
GO:0019894	kinesin binding	molecular_function	6	AP1AR;AP1G1;ARHGEF10;FAM83D;KIF1BP;KIFAP3;KLC3;KTN1;LOC479600;MAPK8IP1;MAPK8IP2;MAPK8IP3;PLEKHM2;PRC1;SHTN1;SNCA;SPAG9;SYBU;TOR1A	19	13536	25	18107	0.549774	0.92626
GO:0048839	inner ear development	biological_process	10	BMP2;BMPER;C1QB;CCM2;CDKN1B;CEBPA;DLL1;FREM2;KCNQ1;LGR5;LIN7A;LOC102153657;LRP10;MAPKAPK2;NEUROD1;PLPPR4;PROX1;PTPN11;STOX1	19	13536	27	18107	0.777143	0.952524
GO:0030178	negative regulation of Wnt signaling pathway	biological_process	10	APCDD1;BARX1;CCND1;CSNK1E;HIC1;LOC479600;MED12;NFATC4;NKD1;NKD2;NLK;NXN;RACK1;TAX1BP3;TRABD2A;TRABD2B;TSC2;TSKU;WWOX	19	13536	27	18107	0.777143	0.952524
GO:0050661	NADP binding	molecular_function	6	CRYM;DHFR;FMO3;FMO4;FMO5;G6PD;GAPDHS;GAPDH;GSR;H6PD;LOC100683724;LOC100688969;LOC106559190;LOC106560188;LOC609048;NDOR1;NNT;NOS1;NOS3	19	13536	27	18107	0.777143	0.952524
GO:0001664	G-protein coupled receptor binding	molecular_function	6	APLN;ARHGEF12;DNAJA1;GNA14;GNAI1;GNAI2;GNAI3;GNAT2;ITGB4;PACRG;PPY;PRKN;PSAP;S1PR1;S1PR2;STUB1;UCN3;USP20;USP33	19	13536	28	18107	0.854724	0.986608
GO:0032720	negative regulation of tumor necrosis factor production	biological_process	9	ACP5;BPI;CACTIN;CD34;CHRNA7;CIDEA;GAS6;HAVCR1;HSF1;IRAK3;LBP;NFKBIL1;PTPN22;RARA;SELENOS;TLR4;TNFAIP3;TRIM27;ZC3H12A	19	13536	29	18107	0.909538	0.99779
GO:0060041	retina development in camera-type eye	biological_process	11	BAX;C1QTNF5;MFRP;CLCN2;CLN8;GNB1;IMPDH2;JMJD6;LAMB2;LAMC3;LPCAT1;MYH10;NECTIN1;NPHP4;NTRK2;RARG;SLC4A5;TGIF2;TUB;ZNF513	19	13536	30	18107	0.945997	0.99779
GO:0042277	peptide binding	molecular_function	5	BDKRB1;CLTA;CRIP1;CSNK1G3;ENPEP;ERAP1;ERAP2;FURIN;LNPEP;LOC106559202;LTA4H;LVRN;MME;NLN;NPEPPS;OXTR;PPIA;LOC111094992;RNPEPL1;RNPEP	19	13536	31	18107	0.96899	1
GO:0006936	muscle contraction	biological_process	7	ACTN2;CALD1;CHRNB1;COL4A3BP;LMOD1;LOC106558660;MYBPC2;MYL6;MYOM1;NDUFS6;SCN7A;SLMAP;TBX20;TMOD1;TMOD2;TMOD3;TPM3;TPM4;VCL	19	13536	33	18107	0.990789	1
GO:0006378	mRNA polyadenylation	biological_process	12	AMFR;NUDT21;APP;CDC73;CPSF1;CPSF2;CPSF4;CPSF6;CSTF2;LOC102157048;LOC111092487;MTPAP;PAF1;PAPOLA;PAPOLB;PAPOLG;PCF11;SSU72;SYMPK;ZC3H3	19	13536	33	18107	0.990789	1
GO:0006303	double-strand break repair via nonhomologous end joining	biological_process	11	BRCC3;C15H16orf87;C16H7orf49;DCLRE1A;DCLRE1B;DCLRE1C;KDM2A;LIG4;MLH1;NHEJ1;PAXX;POLA1;PRKDC;PRPF19;PSMD14;XRCC4;XRCC5;XRCC6	18	13536	18	18107	0.00530089	0.309496
GO:0046875	ephrin receptor binding	molecular_function	6	ANKS1B;AQP1;CBL;CHN1;CRK;EFNA1;EFNA3;EFNA4;EFNA5;EFNB1;EFNB2;EFNB3;GRB2;PIK3CG;PTPN1;SHC1;SIPA1L1;SRC	18	13536	18	18107	0.00530089	0.309496
GO:0005686	U2 snRNP	cellular_component	9	CCDC97;LOC100686524;PHF5A;RBMX2;SF3A1;SF3A2;SF3B1;SF3B2;SF3B5;SF3B6;SNRPA1;SNRPB2;SNRPD1;SNRPD2;SNRPD3;SNRPE;SNRPG;SNRPN;SNURF	18	13536	18	18107	0.00530089	0.309496
GO:0030904	retromer complex	cellular_component	6	ANKFY1;DCTN1;DENND4C;MAGEL2;RAB7A;SDCCAG3;SLC11A2;SNX1;SNX27;SNX3;SNX5;SNX8;TBC1D5;TRIM27;VPS26A;VPS26B;VPS29;VPS35	18	13536	18	18107	0.00530089	0.309496
GO:0033613	activating transcription factor binding	molecular_function	6	AK6;TAF9;ATOH8;DGKQ;DHX33;EEF1D;EP300;HAND2;HDAC4;HDAC7;LOC106557909;MEF2A;MEF2C;MEF2D;PPARG;PRDM16;PSIP1;RELA;SMAD2;ZNF516	18	13536	18	18107	0.00530089	0.309496
GO:0000159	protein phosphatase type 2A complex	cellular_component	7	NKD1;PPP2CA;PPP2CB;PPP2R1A;PPP2R2A;PPP2R2B;PPP2R2C;PPP2R2D;PPP2R3A;PPP2R5A;PPP2R5B;PPP2R5C;PPP2R5D;PPP2R5E;PTPA;STRN3;STRN4;STRN	18	13536	18	18107	0.00530089	0.309496
GO:0043044	ATP-dependent chromatin remodeling	biological_process	9	ACTL6A;ARID1A;CECR2;CHD4;CHD8;HDAC2;MBD3;MTA2;RBBP4;SMARCA1;SMARCA4;SMARCA5;SMARCAD1;SMARCB1;SMARCC1;SMARCC2;SMARCD2;SMARCE1	18	13536	19	18107	0.0294121	0.818326
GO:0003756	protein disulfide isomerase activity	molecular_function	7	ERO1A;ERO1B;ERP27;GLRX2;LOC606772;P4HB;PDIA2;PDIA3;PDIA4;PDIA5;PDIA6;QSOX1;QSOX2;TMX1;TMX3;TMX4;TXNDC11;TXNDC5	18	13536	19	18107	0.0294121	0.818326
GO:0008408	3'-5' exonuclease activity	molecular_function	8	APLF;ERI1;EXD1;EXD2;EXD3;EXOSC10;MRE11;POLA1;POLD1;POLE;POLG;RAD1;RAD50;RAD9A;REV3L;TREX1;ATRIP;TRIR;WRN	18	13536	19	18107	0.0294121	0.818326
GO:0048863	stem cell differentiation	biological_process	7	ELL3;EPCAM;FOXO4;GPM6A;HOXA7;KIT;LIF;LOC102151229;LOC449531;LOC477699;MTF2;PHF19;PSMD11;PUM1;SETD6;SHC4;VSIR;ZNF281	18	13536	19	18107	0.0294121	0.818326
GO:0045739	positive regulation of DNA repair	biological_process	11	ABRAXAS1;BABAM1;BABAM2;BRCC3;CEBPG;EGFR;ERCC8;EYA1;EYA3;PCNA;RNF168;RPS3;SIRT1;TIGAR;TMEM161A;TRIM28;UBE2N;UIMC1	18	13536	19	18107	0.0294121	0.818326
GO:0090503	RNA phosphodiester bond hydrolysis, exonucleolytic	biological_process	10	CNOT6L;CNOT6;CNOT7;CNOT8;DIS3L2;DIS3L;DIS3;EXOSC10;NOCT;PAN2;PAN3;PARN;PNPT1;REXO2;TOE1;TRIR;USB1;XRN2	18	13536	19	18107	0.0294121	0.818326
GO:0021915	neural tube development	biological_process	9	ALDH1A2;AMBRA1;C2CD3;CECR2;DACT1;DCHS1;FAM212A;GRHL2;INTU;ITPK1;NF1;NOTCH1;NUP133;PKD1;PKD2;PLOD3;SEMA3C;ZFP36L1	18	13536	19	18107	0.0294121	0.818326
GO:0042813	Wnt-activated receptor activity	molecular_function	6	FRZB;FZD10;FZD1;FZD2;FZD3;FZD4;FZD5;FZD6;FZD7;FZD9;LRP5;LRP6;RYK;SFRP1;SFRP2;SFRP4;SFRP5;SMO	18	13536	19	18107	0.0294121	0.818326
GO:0048589	developmental growth	biological_process	5	ALKBH1;ASPM;BMPR1A;CGA;CHST11;EIF4H;GAS1;GATA3;GLI2;HOXA11;KDF1;PYGO2;SMAD3;SMAD4;SOX10;SRF;TBCE;ZMIZ1	18	13536	19	18107	0.0294121	0.818326
GO:0000281	mitotic cytokinesis	biological_process	7	ANK3;ANLN;BBS4;CEP55;CKAP2;KIF20A;KIF23;LOC111097407;MITD1;MYH10;NUSAP1;PLK1;SNX18;SNX33;SNX9;SPTBN1;STAMBP;USP8	18	13536	19	18107	0.0294121	0.818326
GO:0055007	cardiac muscle cell differentiation	biological_process	8	ACADM;ARID1A;BMP2;CBY1;FOXP1;GATA6;IFT20;ITGB1;KDM6B;LOC111097105;MYOCD;NOX4;PROX1;SIK1;SLC9A1;SOX6;TBX5;TSC1	18	13536	19	18107	0.0294121	0.818326
GO:0006909	phagocytosis	biological_process	5	ABCA7;ABL1;ANXA11;ANXA1;ANXA3;CDC42SE1;CDC7;CSNK1A1;ELMO1;ICAM5;IRF8;PIK3CA;RAB5A;SLC11A1;SYT7;TUSC2;UNC13D;VAV1	18	13536	20	18107	0.0872839	0.92626
GO:0008139	nuclear localization sequence binding	molecular_function	7	BRAP;CHRNA10;NUP98;IPO13;IPO4;TM9SF1;IPO5;KPNA1;KPNA2;KPNA3;KPNA4;KPNA6;KPNB1;LOC477516;NFKBIA;NUP58;RANBP6;TNPO1;TNPO2;TNPO3	18	13536	20	18107	0.0872839	0.92626
GO:0007611	learning or memory	biological_process	5	ABI2;AFF2;BHLHB9;FZD9;GLP1R;GM2A;KCNAB1;LHX8;MAN2B1;MEF2C;PAFAH1B1;POMK;PRKAR1B;PTEN;PTPRZ1;SLC11A2;TMOD2;ZNF385A	18	13536	20	18107	0.0872839	0.92626
GO:0045786	negative regulation of cell cycle	biological_process	6	ALOX15B;BMP2;CDK5;CDK6;CEBPA;ETS1;GATA3;GMNN;HPGD;INHBA;MEN1;NR4A1;NUPR1;PTPRK;RHOB;TAF6;TGFB1;THAP5	18	13536	20	18107	0.0872839	0.92626
GO:0001890	placenta development	biological_process	6	ADA;ALKBH1;BIRC2;CCNF;DNMT3L;ETNK2;GJB3;HNF1A;HSD17B2;HSP90AB1;LEP;LOC102153171;LOC102156762;MAP3K4;MAPK14;NDP;PEG10;PPARD	18	13536	20	18107	0.0872839	0.92626
GO:0043552	positive regulation of phosphatidylinositol 3-kinase activity	biological_process	10	AMBRA1;ATG14;ERBB4;FGFR3;FGR;FLT1;LYN;PDGFB;PDGFRB;PIK3R4;PTK2B;RAC1;SH3GLB1;TEK;TGFB1;TNFAIP8L3;VAV2;VAV3	18	13536	20	18107	0.0872839	0.92626
GO:0045787	positive regulation of cell cycle	biological_process	6	BCL2L11;C12H6orf89;CALR;CITED2;DNAAF4;CCPG1;FGFR1;FLT3LG;GDPD5;LRP6;NR4A3;RABGGTA;TGM1;RARA;SLC6A4;TBX3;TCF3;TGFB2;TRIM21;TRIM32	18	13536	20	18107	0.0872839	0.92626
GO:1900026	positive regulation of substrate adhesion-dependent cell spreading	biological_process	11	APOA1;ARHGEF7;ARPC2;BRAF;C1QBP;CALR;CARMIL1;CDC42;CIB1;DMTN;FLNA;ITGB3;LRRC45;RAC3;MYOC;OLFM4;RAC1;TRIOBP;UNC13D	18	13536	20	18107	0.0872839	0.92626
GO:0090314	positive regulation of protein targeting to membrane	biological_process	9	AKT2;C2CD5;CDK5R1;CDK5;CEMIP;CHP1;CIB1;ERBB2;FIS1;CLDN15;ITGB1BP1;KCNB1;LOC482730;MFF;MIEF2;MTCL1;MYO1C;STOM;TCAF2	18	13536	20	18107	0.0872839	0.92626
GO:0061024	membrane organization	biological_process	5	AP2A1;AP2B1;ARPC2;BIN1;LOC111091071;CCDC88A;CHP1;CLTA;DHCR24;EPN2;FNBP1L;FZD4;GNPAT;LPCAT2;SGCA;SGCB;SGCD;SGCE;SGCZ	18	13536	20	18107	0.0872839	0.92626
GO:0032543	mitochondrial translation	biological_process	8	DNAJC9;MRPS16;GATB;GATC;GFM2;HARS2;HARS;LOC100688849;LOC100855841;MRPL2;MRPL47;MRPS17;MRPS18A;MRPS18C;NOA1;PTCD3;PTRH1;QRSL1;RARS2	18	13536	20	18107	0.0872839	0.92626
GO:0032212	positive regulation of telomere maintenance via telomerase	biological_process	13	AURKB;TRNAD-GUC;CTNNB1;HMBOX1;HNRNPA1;LOC100683228;MAP3K4;MAPK15;MAPK1;MAPKAPK5;NEK2;NEK7;PKIB;PNKP;POT1;STN1;TNKS2;TNKS;WRAP53	18	13536	21	18107	0.184745	0.92626
GO:0046326	positive regulation of glucose import	biological_process	11	AKT1;ARPP19;C1QTNF2;CAPN10;CLTCL1;CREBL2;FGF19;FGF21;GPC3;IGF1;INSR;IRS2;MAPK14;NFE2L2;PRKCI;RHOQ;SLC1A2;SORBS1	18	13536	21	18107	0.184745	0.92626
GO:0070527	platelet aggregation	biological_process	7	BLOC1S4;CSRP1;FERMT3;FLNA;HSPB1;ILK;ITGB3;METAP1;MYH9;MYL9;PLEK;PTPN6;RAP2B;SLC7A11;STXBP1;STXBP3;TLN1;VCL	18	13536	21	18107	0.184745	0.92626
GO:0043484	regulation of RNA splicing	biological_process	11	AFF2;AHNAK;CELF1;CLK1;CLK2;CLK3;CLK4;ESRP1;ESRP2;FASTK;HNRNPF;HNRNPH1;LOC100856585;MBNL1;MBNL2;PQBP1;RBFOX2;SON	18	13536	21	18107	0.184745	0.92626
GO:0010332	response to gamma radiation	biological_process	7	BAK1;BAX;BRCA2;CHEK2;DCUN1D3;ERCC6;LIG4;LOC102152029;MEN1;PML;PRKAA1;PRKDC;RHOA;GPX1;SOD2;TIGAR;TP53;TP73;XRCC2	18	13536	21	18107	0.184745	0.92626
GO:0030544	Hsp70 protein binding	molecular_function	6	BAG6;CDK1;DNAJA1;DNAJB1;DNAJC10;DNAJC2;ERN1;HIKESHI;METTL21A;MVD;NOD2;NUP62;IL4I1;PACRG;PRKN;RNF207;RPS3;SACS;STUB1	18	13536	21	18107	0.184745	0.92626
GO:0097192	extrinsic apoptotic signaling pathway in absence of ligand	biological_process	9	BAD;BAG3;BAK1;BAX;BCL2A1;BCL2L11;BCL2L1;BCL2L2;CASP2;EYA2;FADD;FOXO3;GSK3A;GSK3B;ITGAV;KITLG;LCN2;MKNK2;LOC106560107	18	13536	21	18107	0.184745	0.92626
GO:0046580	negative regulation of Ras protein signal transduction	biological_process	11	DAB2IP;FBP1;MAPKAP1;MFN2;NF1;NUP62;IL4I1;RABGEF1;RAPGEF1;RASA1;RASA2;ZBTB38;RASA3;RASA4B;RASAL2;RASAL3;SPRY1;SPRY2;STAMBP;TNK1	18	13536	21	18107	0.184745	0.92626
GO:0060976	coronary vasculature development	biological_process	9	ADAMTS6;AP2B1;C4H5orf42;DCTN5;DNM2;GPC3;LOC111095863;LRP2;LTBP1;MEGF8;MYH10;NDST1;PLXND1;PRDM1;SMAD6;SNX17;SUFU;VEGFB	18	13536	22	18107	0.313978	0.92626
GO:0001731	formation of translation preinitiation complex	biological_process	9	DENR;EIF2D;EIF2S3;EIF3A;EIF3B;EIF3D;EIF3E;EIF3F;EIF3H;EIF3I;EIF3J;EIF3L;EIF3M;EIF4B;EIF4H;LOC102156972;LOC479795;MCTS1	18	13536	22	18107	0.313978	0.92626
GO:0003746	translation elongation factor activity	molecular_function	8	EEF1A1;EEF1A2;EEF1B2;EEF1D;EEF1E1;EEF1G;EEFSEC;EIF5A2;EIF5A;ELOB;ELOF1;GFM1;GFM2;GTPBP1;GTPBP2;LOC102155289;LOC111095622;TUFM	18	13536	22	18107	0.313978	0.92626
GO:0040018	positive regulation of multicellular organism growth	biological_process	7	ATP8A2;BBS2;BBS4;CELF1;CREB1;CSF1;DIO3;EZR;GHRHR;GPAM;HSF1;LOC490969;MKKS;LOC102153017;PEX5;PLS1;PPIB;SPTBN4;VIL1	18	13536	22	18107	0.313978	0.92626
GO:0005719	nuclear euchromatin	cellular_component	14	ALKBH1;ASH2L;CREB1;CTNNB1;H1F0;H2AFZ;JUN;KLF4;LOC111091360;LOC488264;NR1H4;NSMF;POLR2A;RBMX;RUVBL2;SIRT1;TBP;TRIM28	18	13536	22	18107	0.313978	0.92626
GO:0050770	regulation of axonogenesis	biological_process	9	CACNA1A;CHN1;EFNA1;EPHA4;EPHB3;FMOD;MARK2;OGN;PLPPR5;RET;SIPA1L1;SLIT1;SLIT2;SLIT3;SSH1;SSH2;SSH3;UST	18	13536	22	18107	0.313978	0.92626
GO:0008094	DNA-dependent ATPase activity	molecular_function	11	BPTF;CDK7;CHD6;CHD8;DHX36;ERCC2;ERCC6;GTF2H1;GTF2H3;MNAT1;RAD51B;RAD51C;RAD51D;RAD51;RBBP4;SMARCA4;XRCC2;XRCC3	18	13536	22	18107	0.313978	0.92626
GO:0040007	growth	biological_process	3	BCL2L1;BMP2;BMP3;BMP6;BMP7;CCNB2;FOXP2;GDF11;INHBA;INHBB;LOC100855618;LOC484444;LOC607768;RFTN1;SAFB;SELENOP;VPS54;ZFP91;CNTF	18	13536	22	18107	0.313978	0.92626
GO:0000976	transcription regulatory region sequence-specific DNA binding	molecular_function	9	BAHCC1;BAHD1;CRY2;KDM3A;MKL1;NFE2L1;NFE2L2;NFE2L3;NKX3-1;NONO;NR5A2;NR6A1;PITX2;PRKN;RARG;SFPQ;SOX12;TNRC18	18	13536	22	18107	0.313978	0.92626
GO:0030168	platelet activation	biological_process	6	ADRA2A;ADRA2B;BLOC1S3;C1GALT1C1;CD40LG;F2R;F5;F8;FZD6;GNA13;LOC474898;P2RX1;P2RY1;PIK3CB;PTPN11;SRF;VAV2;VWF	18	13536	23	18107	0.457573	0.92626
GO:0006635	fatty acid beta-oxidation	biological_process	10	ABCD1;ABCD2;ABCD3;ACOX1;BDH2;DECR1;ECHS1;ECI1;EHHADH;HADHA;HADH;LEP;PEX2;PEX5;PEX7;PPARD;SESN2;SLC25A17	18	13536	23	18107	0.457573	0.92626
GO:0035116	embryonic hindlimb morphogenesis	biological_process	10	AFF3;ALX3;ALX4;BMP4;CTNNB1;GPC3;MED1;MSX1;MSX2;NOTCH1;OSR1;OSR2;PITX1;PITX2;RARB;RARG;TBX3;ZBTB16	18	13536	23	18107	0.457573	0.92626
GO:0003281	ventricular septum development	biological_process	11	AP2B1;C4H5orf42;CYR61;DCTN5;DNM2;FRS2;GATA3;HEG1;LMO4;LRP2;LTBP1;LUZP1;NPRL3;PRDM1;SMAD6;SUFU;TBX5;TRIP11	18	13536	23	18107	0.457573	0.92626
GO:0045332	phospholipid translocation	biological_process	9	ABCA1;ABCB4;ATP10A;ATP10B;ATP10D;ATP11A;ATP11C;ATP8A1;ATP8A2;ATP8B1;ATP8B2;ATP8B4;ATP9A;ATP9B;KCNN4;LOC111095132;P2RX7;TMEM30A	18	13536	23	18107	0.457573	0.92626
GO:0004181	metallocarboxypeptidase activity	molecular_function	9	AEBP1;AGBL2;AGBL3;AGBL4;AGBL5;TRNAA-AGC;AGTPBP1;CPA1;CPA2;SSMEM1;CPA3;CPA4;CPB1;CPD;CPE;CPM;CPXM1;CPXM2;CPZ;FOLH1	18	13536	23	18107	0.457573	0.92626
GO:0010107	potassium ion import	biological_process	8	ABCC9;ATP1A3;ATP1B1;ATP1B2;ATP1B3;KCNJ11;KCNJ12;KCNJ14;KCNJ16;KCNJ2;KCNJ3;KCNJ4;KCNJ5;KCNJ8;KCNJ9;LOC111093450;LOC488636;SLC12A6	18	13536	23	18107	0.457573	0.92626
GO:0031526	brush border membrane	cellular_component	8	AQP1;B4GALT1;CA4;CD36;CYBRD1;GNA12;GNA13;LRP2;MFSD10;PRKCB;SHANK2;SLC11A2;SLC22A5;SLC34A3;SLC3A1;SLC9A3R1;TMEM27;TRPM6	18	13536	24	18107	0.596554	0.92626
GO:0009408	response to heat	biological_process	5	CASQ1;CXCL12;DNAJA1;DNAJA2;DNAJA3;DNAJA4;EIF2B5;GCLC;HSF1;HSPA2;IGF1;LRP11;NOS1;PSIP1;SOD1;TP53INP1;TRPV1;TRPV2	18	13536	24	18107	0.596554	0.92626
GO:0070830	bicellular tight junction assembly	biological_process	9	ACTN4;ARL2;CLDN1;CLDN3;DLG1;ECT2;GRHL2;LOC111091118;MARVELD2;MPP7;OCLN;PARD3;PARD6G;RAB13;RAMP2;SRF;TBCD;WNT11	18	13536	25	18107	0.716847	0.92626
GO:0048469	cell maturation	biological_process	8	BFSP1;BHLHA15;CBFB;CEBPA;CTNNB1;EPAS1;FGFR1;FZD5;GATA3;GDF11;GHRHR;IL15;LOC102151229;LOC449531;PPARG;PTH1R;SOX10;TUSC2	18	13536	26	18107	0.811731	0.972031
GO:0000027	ribosomal large subunit assembly	biological_process	7	BRIX1;LOC100856673;LOC106558887;MDN1;MRPL11;MRPL20;MRTO4;NLE1;PPAN;RPF1;RPF2;RPL10;RPL11;RPL23A;RPL24;RPL5;RPL6;RSL24D1	18	13536	26	18107	0.811731	0.972031
GO:0050699	WW domain binding	molecular_function	6	CDC25C;DAZAP2;ENAH;FAM189B;KIF20B;LOC100686274;NDFIP2;PMEPA1;RAPGEF2;SCNN1A;SCNN1B;TCEAL1;TCEAL4;TCEAL5;TCEAL8;TRAF4;WBP11;WBP1	18	13536	26	18107	0.811731	0.972031
GO:0031225	anchored component of membrane	cellular_component	6	CD177;CD55;CDH13;CNTFR;DPEP1;GPC1;GPC2;GPC4;LOC102155259;LPL;LY6E;LY6H;LYPD6;MDGA2;NEGR1;SVIP;UMOD;VNN1	18	13536	32	18107	0.993476	1
GO:0030100	regulation of endocytosis	biological_process	6	ABL2;ARFGAP1;BIN1;LOC111091071;CDH13;EPN2;OPHN1;PACSIN1;PACSIN2;PACSIN3;LOC111090846;PTPN1;RAB17;RAB4A;SPHAR;RAB5A;RAB5B;RAB5C;SNX12;STON2	17	13536	17	18107	0.00709321	0.373667
GO:0005977	glycogen metabolic process	biological_process	8	AKT1;GNMT;GSK3B;IL6ST;PCDH12;PHKA1;PHKA2;PHKB;PPP1CA;PPP1CB;PPP1CC;PPP1R3B;PPP1R3D;PPP1R3E;PRKAG2;LOC106559811;SLC37A4;STK40	17	13536	17	18107	0.00709321	0.373667
GO:0005666	DNA-directed RNA polymerase III complex	cellular_component	10	CRCP;POLR1C;POLR1D;LOC111092404;POLR2E;POLR2F;POLR2H;POLR2K;POLR2L;CHID1;POLR3A;POLR3B;POLR3C;POLR3D;POLR3F;POLR3GL;POLR3G;POLR3H;POLR3K	17	13536	17	18107	0.00709321	0.373667
GO:0000793	condensed chromosome	cellular_component	10	AKAP8;BAZ1B;C15H16orf87;CDK2;HMGB1;HMGB2;LIG4;LOC102152056;LOC111095262;LOC481514;MKI67;NCAPG;PES1;RAD51;SMARCA5;TOP2A;TOP3B	17	13536	17	18107	0.00709321	0.373667
GO:0001056	RNA polymerase III activity	molecular_function	9	CRCP;POLR1C;POLR1D;LOC111092404;POLR2E;POLR2F;POLR2H;POLR2K;POLR2L;CHID1;POLR3A;POLR3B;POLR3C;POLR3D;POLR3F;POLR3GL;POLR3G;POLR3H;POLR3K	17	13536	17	18107	0.00709321	0.373667
GO:0030131	clathrin adaptor complex	cellular_component	11	AP1B1;AP1G1;AP1G2;AP1M1;AP1M2;AP2A1;AP2A2;AP2B1;AP2M1;AP3B1;AP3M1;AP3M2;AP4B1;AP4M1;GGA1;GGA2;GGA3	17	13536	17	18107	0.00709321	0.373667
GO:0046677	response to antibiotic	biological_process	6	ALPL;CYB5R4;ENDOG;ETS1;HYAL1;HYAL2;HYAL3;ID1;IFRD2;JAK1;JAK2;PPP2CB;RSRC1;SKIL;SLC1A3;TP53;ZC3H8	17	13536	17	18107	0.00709321	0.373667
GO:0043001	Golgi to plasma membrane protein transport	biological_process	9	ANK3;ARFRP1;BBS2;BLZF1;DBNDD2;SYS1;GOLGA4;GOLGA7;GOLPH3;MACF1;NSF;OPTN;RAB26;RAB31;SPTBN1;VAMP2;VAMP3;VAMP5	17	13536	17	18107	0.00709321	0.373667
GO:0000077	DNA damage checkpoint	biological_process	9	ATM;CLOCK;E2F1;HINFP;INTS7;LOC489372;MAP3K20;MAPK14;PEA15;PTPN11;RAD17;RAD1;RHNO1;TIPRL;TP53BP1;TREX1;ATRIP;USP28	17	13536	18	18107	0.0375627	0.910531
GO:0032588	trans-Golgi network membrane	cellular_component	11	ARFIP1;CABP7;CLIP3;CLTA;DBNDD2;SYS1;LGR5;LOC111096175;MARCH1;MMP24;MYO1B;RAB31;SCAMP2;SCAMP5;STX6;TEPSIN;TMEM165;TMEM79	17	13536	18	18107	0.0375627	0.910531
GO:0070412	R-SMAD binding	molecular_function	6	ANKRD1;CTNNB1;FOS;JUN;LDLRAD4;MEN1;PMEPA1;PPM1A;RANBP3;RGCC;SMAD2;SMAD3;SMAD4;SMAD6;TRIM33;ZC3H3;ZEB2	17	13536	18	18107	0.0375627	0.910531
GO:0010800	positive regulation of peptidyl-threonine phosphorylation	biological_process	10	BMP7;CAB39;CEMIP;CHI3L1;EGF;GCG;GSK3A;GSK3B;MAPK1;PLK1;PRKAG2;LOC106559811;RIPK2;S1PR2;SPHK1;STOX1;TGFB1;UBE2K	17	13536	18	18107	0.0375627	0.910531
GO:0061025	membrane fusion	biological_process	6	BET1L;BLOC1S6;CHP1;DNM1L;HACE1;LOC102154542;NAPA;NAPB;NAPG;NSFL1C;STX12;STX18;UBXN2A;UBXN2B;USO1;VPS33B;VTI1A	17	13536	18	18107	0.0375627	0.910531
GO:0006270	DNA replication initiation	biological_process	11	CCNE1;CDC45;CDC6;CDC7;GINS4;MCM10;MCM2;MCM3;MCM4;MCM5;MCM6;MCM7;ORC4;POLA1;POLA2;POLE4;PRIM1	17	13536	18	18107	0.0375627	0.910531
GO:0032456	endocytic recycling	biological_process	7	ARL4C;DENND1B;EHD1;EHD2;EHD3;EHD4;EPG5;RAB11FIP3;RAB13;RAB17;RAB35;RFLNB;VPS53;SNF8;SNX4;VPS50;VPS51;VPS52	17	13536	18	18107	0.0375627	0.910531
GO:2000379	positive regulation of reactive oxygen species metabolic process	biological_process	7	CD36;CDKN1A;GADD45A;GRB2;MAPK14;NFE2L2;NOX5;PDGFB;PID1;RIPK3;RNF41;ROMO1;TGFBR2;THBS1;TP53;TSPO;ZC3H12A	17	13536	18	18107	0.0375627	0.910531
GO:0000132	establishment of mitotic spindle orientation	biological_process	9	ARHGEF2;CDK5RAP2;CENPA;EYA1;GPSM2;HTT;MCPH1;NDC80;NDE1;NDEL1;PAFAH1B1;SPDL1;SPRY1;SPRY2;WDR43;WDR81;ZW10	17	13536	18	18107	0.0375627	0.910531
GO:0035327	transcriptionally active chromatin	cellular_component	12	AFF4;BCAS3;CTR9;ELL;ESR1;EXOSC10;EXOSC3;EXOSC4;EXOSC5;ICE1;ICE2;LOC488264;PADI2;PSIP1;TTC37;WDR61;ZC3H8	17	13536	18	18107	0.0375627	0.910531
GO:0030914	STAGA complex	cellular_component	10	AK6;TAF9;ATXN7;KAT2A;LOC102155671;LOC475708;LOC608766;LOC608905;SAP130;SUPT7L;TADA1;TADA2B;TADA3;TAF10;TAF12;TAF5L;TAF6L;TRRAP	17	13536	18	18107	0.0375627	0.910531
GO:0000123	histone acetyltransferase complex	cellular_component	8	CREBBP;ELP1;ELP2;ELP3;EP300;ING4;JADE1;JADE3;KANSL1L;KANSL2;KANSL3;KAT7;MCRS1;MEAF6;OGT;PHF20;TRRAP	17	13536	18	18107	0.0375627	0.910531
GO:0032993	protein-DNA complex	cellular_component	4	ATF6B;CHD4;CTNNB1;DDIT3;EP300;EYA1;HHEX;HOXA11;KDM5A;LEF1;NFE2L2;NFYA;NFYB;NFYC;SOX12;SUZ12;TCF7L2	17	13536	18	18107	0.0375627	0.910531
GO:0048010	vascular endothelial growth factor receptor signaling pathway	biological_process	10	BCAR1;BMPR2;CYFIP2;FLT4;FOXC2;KDR;MAPK14;MAPKAPK2;NCKAP1L;NRP1;PRKD1;PTK2B;ROCK2;SULF1;VAV2;VEGFC;VEGFD	17	13536	18	18107	0.0375627	0.910531
GO:0070273	phosphatidylinositol-4-phosphate binding	molecular_function	8	ARFIP1;COL4A3BP;DAB2IP;GOLPH3L;GOLPH3;LANCL2;LOC102153142;LOC610874;OSBPL5;OSBPL8;OSBP;PLEKHA5;PLEKHA8;PLEKHF1;SESTD1;SH3PXD2B;SNX3	17	13536	18	18107	0.0375627	0.910531
GO:0005685	U1 snRNP	cellular_component	9	LOC102153257;LUC7L2;LUC7L3;LUC7L;PRPF39;PRPF40A;SNRNP70;SNRPA;SNRPB;SNRPC;SNRPD1;SNRPD2;SNRPD3;SNRPE;SNRPF;SNRPG;SNRPN;SNURF	17	13536	18	18107	0.0375627	0.910531
GO:0045740	positive regulation of DNA replication	biological_process	11	CALR;CTC1;DNA2;EGFR;EREG;GLI1;GLI2;HRAS;IGF1R;IGF1;INSR;KITLG;PCNA;PDGFA;PDGFB;PLA2G1B;TGFB3	17	13536	18	18107	0.0375627	0.910531
GO:0030511	positive regulation of transforming growth factor beta receptor signaling pathway	biological_process	12	CDKN2B;CITED2;DAB2;FLCN;GIPC1;HIPK2;ING2;ITGA8;LRG1;MEN1;NPNT;RNF111;SMAD4;SNW1;STK11;TGFB1I1;THBS1	17	13536	18	18107	0.0375627	0.910531
GO:0051592	response to calcium ion	biological_process	7	ALG2;ANXA11;CAV1;EP300;HOMER1;ITPR3;LOC111098223;MNAT1;P2RX7;PDCD6;PEF1;PPP3CA;S100A16;SEC31A;SLC25A12;SLC25A13;THBS1;TRPC1	17	13536	19	18107	0.106843	0.92626
GO:0040014	regulation of multicellular organism growth	biological_process	6	AFG3L2;APP;ATRN;CACNA2D2;FTO;GAMT;HTRA2;IGF1;MBD5;NPY1R;PIK3CA;PRLH;PTPN11;SGPL1;SOD1;STAT3;TNKS2	17	13536	19	18107	0.106843	0.92626
GO:0043488	regulation of mRNA stability	biological_process	10	CARHSP1;ELAVL4;FXR1;HNRNPD;MAPKAPK2;PCID2;PUM2;RC3H1;RNASEL;SCGB1A1;SET;TNPO1;YTHDF2;ZC3H14;ZFP36L1;ZFP36L2;ZFP36	17	13536	19	18107	0.106843	0.92626
GO:0032012	regulation of ARF protein signal transduction	biological_process	11	AGAP1;ARFGEF1;ARFGEF2;ARFGEF3;CYTH1;CYTH2;CYTH3;CYTH4;FBXO8;GBF1;IQSEC1;IQSEC2;IQSEC3;PSD2;PSD3;PSD4;PSD	17	13536	19	18107	0.106843	0.92626
GO:0001937	negative regulation of endothelial cell proliferation	biological_process	7	ACVRL1;APOE;APOH;ATOH8;ATPIF1;CAV1;CAV2;NF1;NR2F2;PTPRM;RGCC;SPARC;SULF1;SYNJ2BP;THBS1;TNMD;VASH1	17	13536	19	18107	0.106843	0.92626
GO:0009790	embryo development	biological_process	6	AKIRIN2;BAG6;CELF4;DLG2;EHMT1;HUS1;MAPK9;NPM2;NRG1;OSR2;PDGFC;PTF1A;RAI2;RICTOR;STOX2;TDG;TNFAIP1	17	13536	19	18107	0.106843	0.92626
GO:0050840	extracellular matrix binding	molecular_function	4	ADAMTS15;ADAMTS5;ADGRG1;BGN;CD248;CYR61;DCN;ELN;ITGAV;OLFML2A;OLFML2B;SMOC1;SPARC;SPOCK2;SPP1;TGFBI;VTN	17	13536	19	18107	0.106843	0.92626
GO:0060170	ciliary membrane	cellular_component	8	ARL13B;BBS2;BBS4;CASK;CLTB;DRD1;EPS15;GPI;SCNN1A;SEPT2;SHANK2;SHANK3;SSTR3;TCTN2;TMEM17;TMEM231;TMEM67	17	13536	20	18107	0.217676	0.92626
GO:0007062	sister chromatid cohesion	biological_process	6	BUB3;CENPL;CENPM;CLASP2;DDX11;DYNC1I1;DYNC1I2;ESCO1;FBXW7;ITGB3BP;KIF22;MCMBP;PHB2;SEH1L;SMC5;SPC24;STAG2	17	13536	20	18107	0.217676	0.92626
GO:0060612	adipose tissue development	biological_process	8	AMER1;ATF2;CREB5;DYRK1B;EBF2;FTO;LEP;LRP5;PAXIP1;PIK3CA;PPARD;PPARGC1A;SELENOM;SH3PXD2B;SLC25A25;SPART;CCDC169;ZNF516	17	13536	20	18107	0.217676	0.92626
GO:0007257	activation of JUN kinase activity	biological_process	14	AXIN1;CD40LG;DAB2IP;ERCC6;ERN1;ERN2;FCER1A;GAB1;MAP3K11;MAP3K20;MAP4K2;MAPK8IP3;MUL1;PTPN1;SPAG9;SYK;TNFSF11	17	13536	20	18107	0.217676	0.92626
GO:0007566	embryo implantation	biological_process	5	DDR1;EMP2;FKBP4;LOC102155834;LIF;MMP2;MMP9;MST1;OOEP;POLR1B;PPARD;PTGS2;RECK;RXRA;SOD1;TRIM28;UBE2Q1;VMP1	17	13536	20	18107	0.217676	0.92626
GO:0086091	regulation of heart rate by cardiac conduction	biological_process	7	ANK2;CACNA1D;CAMK2D;CAV1;CTNNA3;DSC2;DSG2;DSP;GJA5;HCN4;KCNA5;KCNJ2;KCNQ1;PKP2;SCN1B;SCN2B;SCN3B	17	13536	20	18107	0.217676	0.92626
GO:0046966	thyroid hormone receptor binding	molecular_function	8	GTF2B;HMGN3;JMJD1C;MED12;MED17;MED1;MED24;MED30;NCOA6;NCOR1;NUP62;IL4I1;PRMT2;TAF11;TAF7;THRAP3;TRIP12;ZNHIT3	17	13536	20	18107	0.217676	0.92626
GO:0009966	regulation of signal transduction	biological_process	7	AFAP1;BIRC2;BIRC5;BIRC6;CDC42SE2;CNKSR3;CXHXorf36;FURIN;GLRX2;IPCEF1;LOC106558815;MGLL;NCLN;PPP1R2;SPRED3;SPRY3;VWCE	17	13536	21	18107	0.357636	0.92626
GO:0015035	protein disulfide oxidoreductase activity	molecular_function	7	CHCHD4;DNAJC10;ENOX2;ERO1A;ERO1B;GFER;GLRX2;GLRX3;GLRX5;GLRX;GSTK1;LOC474798;PTGES2;SH3BGRL3;TXN2;TXNL1;TXNRD1	17	13536	21	18107	0.357636	0.92626
GO:0019882	antigen processing and presentation	biological_process	4	AZGP1;DLA-12;DLA88;FCGRT;HFE;LOC100683099;LOC100685196;PSMB8;RAB10;RAB27A;RAB32;RAB35;RAB3B;RAB3C;RAB4A;SPHAR;RAB8B;RELB	17	13536	21	18107	0.357636	0.92626
GO:0030331	estrogen receptor binding	molecular_function	9	CCDC62;CTNNB1;DDX5;DNAAF4;CCPG1;LEF1;MED1;MMS19;NKX3-1;NRIP1;PADI2;PPARGC1B;PRMT2;STRN;TAF10;TRIP4;WIPI1;ZNF366	17	13536	21	18107	0.357636	0.92626
GO:0045070	positive regulation of viral genome replication	biological_process	9	ADARB1;ADAR;DDB1;HACD3;LOC102156058;LOC488947;NOTCH1;NR5A2;PKN2;PPID;PPIE;PPIH;RAD23A;SRPK1;SRPK2;STAU1;TARBP2	17	13536	21	18107	0.357636	0.92626
GO:0009954	proximal/distal pattern formation	biological_process	8	ALDH1A2;CHSY1;CTNNB1;CYP26B1;DLL1;DLX2;EN1;GLI1;GLI2;GREM1;HOXA10;HOXA11;HOXA9;HOXC10;HOXD11;HOXD10;HOXD9;PBX1	17	13536	21	18107	0.357636	0.92626
GO:0006605	protein targeting	biological_process	6	AKAP12;AKAP5;ERBIN;GIPC1;GPHN;HPS4;PAN3;RAB27A;RHOD;RPL11;STXBP4;SYNJ2BP;TRAK2;YWHAE;YWHAG;YWHAQ;ZDHHC3	17	13536	21	18107	0.357636	0.92626
GO:0048873	homeostasis of number of cells within a tissue	biological_process	7	BAX;CORO1A;CSF1;F2R;FH;FLT3LG;GIGYF2;IL20RB;ILDR2;KMT2A;KRAS;LRRC45;RAC3;P2RX7;PTPN11;RAC1;SASH3;VPS54	17	13536	21	18107	0.357636	0.92626
GO:0004190	aspartic-type endopeptidase activity	molecular_function	8	ATP6AP2;BACE1;BACE2;CASP3;CASP7;CTSD;HM13;LOC102155597;LOC483802;LOC487429;LOC611675;NRIP2;NRIP3;PGA;PSEN1;PSEN2;SPPL3	17	13536	21	18107	0.357636	0.92626
GO:0005905	clathrin-coated pit	cellular_component	5	ACKR3;AP2M1;AP2S1;CUBN;DAB2;EPN3;FCHO2;HIP1R;LRP2;LRP3;NECAP1;RAB35;SNAP91;SORT1;SRPRB;TFRC;TNK2	17	13536	21	18107	0.357636	0.92626
GO:0090398	cellular senescence	biological_process	6	C10H2orf40;CALR;CDKN1A;CDKN2A;HRAS;KAT6A;LOC102152029;MAP2K1;NSMCE2;OPA1;PML;PRMT6;SMC6;SRF;TBX3;TERF2;ULK3	17	13536	21	18107	0.357636	0.92626
GO:0097503	sialylation	biological_process	7	ST3GAL1;ST3GAL2;ST3GAL3;ST3GAL4;ST3GAL5;ST3GAL6;ST6GAL1;ST6GAL2;ST6GALNAC2;ST6GALNAC3;ST6GALNAC4;PIP5KL1;ST6GALNAC5;ST6GALNAC6;ST8SIA1;ST8SIA2;ST8SIA4;ST8SIA5;PIAS2	17	13536	21	18107	0.357636	0.92626
GO:0009058	biosynthetic process	biological_process	4	AADAT;ACCS;ALDH1L2;APMAP;GCAT;GMPPA;GMPPB;GOT2;GPT;KYAT1;KYAT3;LOC100855730;NDUFAF6;PBLD;PCYT1B;PCYT2;SPTLC1	17	13536	21	18107	0.357636	0.92626
GO:0004298	threonine-type endopeptidase activity	molecular_function	8	LOC102152203;PSMA1;PSMA2;PSMA3;PSMA5;PSMA6;PSMA7;PSMB10;PSMB1;PSMB2;PSMB3;PSMB4;PSMB5;PSMB6;GLTPD2;PSMB7;PSMB8;PSMB9	17	13536	22	18107	0.506072	0.92626
GO:0008047	enzyme activator activity	molecular_function	4	ALOX5AP;ARL1;CFLAR;CLPS;CYB5B;DCP1A;DCP1B;DNMT3L;GM2A;GMFG;LRCOL1;OGT;PRKCE;PRKRA;PSAP;RICTOR;SLX4	17	13536	23	18107	0.643485	0.92626
GO:0033077	T cell differentiation in thymus	biological_process	10	B2M;CDK6;CTNNB1;DNAJA3;FADD;FZD5;FZD7;JMJD6;LIG4;LOC490969;MAFB;NKAP;PRKDC;RIPK3;ZBTB1;ZFP36L1;ZFP36L2	17	13536	23	18107	0.643485	0.92626
GO:0002548	monocyte chemotaxis	biological_process	6	ANXA1;CCL17;CCL20;CCL23;CCL24;CCL25;CCL2;CCL7;CCL8;CX3CL1;FLT1;LGALS3;LOC480601;LOC480603;PDGFB;PTPRO;TNFSF11	17	13536	23	18107	0.643485	0.92626
GO:0009611	response to wounding	biological_process	5	ABHD2;CASP3;CCL2;GLI1;IL6;ITGB4;MAP2K4;NMNAT1;NMNAT3;PDGFB;SLC1A2;SLC1A3;SRSF5;SULF2;TGFB1;TGFB2;VASH1	17	13536	23	18107	0.643485	0.92626
GO:0007269	neurotransmitter secretion	biological_process	8	BRSK1;CACNA1B;CASK;DVL1;LIN7A;LIN7B;LIN7C;NRXN1;PDZD11;PPFIA2;PPFIA3;PPT1;STXBP1;SYN1;SYN2;SYN3;UNC13A	17	13536	24	18107	0.757458	0.933273
GO:0043124	negative regulation of I-kappaB kinase/NF-kappaB signaling	biological_process	10	ABL1;CARD8;CASP8;DAB2IP;DNAJA3;ESR1;IL1RL1;LOC484411;NLRX1;OPTN;OTUD7B;RIPK1;RORA;SIRT1;TNFAIP3;TNIP1;TRIM59	17	13536	24	18107	0.757458	0.933273
GO:0046627	negative regulation of insulin receptor signaling pathway	biological_process	12	ENPP1;INPP5K;KANK1;LMBRD1;LOC102157036;LOC491503;NCOA5;PID1;PRKCB;PRKCZ;PTPN2;PTPRE;RPS6KB1;SOCS2;SOCS3;TSC1;TSC2	17	13536	25	18107	0.843756	0.975028
GO:0050808	synapse organization	biological_process	5	ANK3;CTNNB1;CTNND2;ELFN1;LOC478038;LOC111092012;LRRTM2;LRRTM4;NFASC;NLGN4X;PAK3;RAB39B;SEMA3E;SLC9A6;SNCA;SNCG;TSC1;WNT7B	17	13536	25	18107	0.843756	0.975028
GO:0001917	photoreceptor inner segment	cellular_component	6	AIPL1;BBS4;CIB2;DNM1;DNM2;DNM3;DRAM2;ENO2;GNAT2;GNB5;MAK;MYO7A;RDH11;RGS9;RP1;SHANK2;WHRN	17	13536	26	18107	0.904249	0.99779
GO:0045494	photoreceptor cell maintenance	biological_process	5	ADGRV1;BBS10;BBS12;BBS2;BBS4;CIB2;CLN8;DRAM2;ERCC6;IQCB1;MAK;MKKS;LOC102153017;NPHP3;NPHP4;SPATA7;TUB;USH1C	17	13536	26	18107	0.904249	0.99779
GO:0004896	cytokine receptor activity	molecular_function	6	CD44;CD74;CSF2RA;CSF2RB;CSF3R;GHR;IFNGR1;IFNLR1;IL11RA;IL13RA1;IL13RA2;IL20RB;IL22RA1;IL2RG;IL4R;IL7R;LOC487739	17	13536	26	18107	0.904249	0.99779
GO:0019233	sensory perception of pain	biological_process	8	AQP1;CDK5;CHRNA4;CHRNB2;DLG2;HOXB8;IAPP;MECP2;MME;NDN;NIPSNAP1;NLGN2;NMU;LOC111098622;NPY1R;P2RX7;POMK;RETREG1	17	13536	28	18107	0.968504	1
GO:0045638	negative regulation of myeloid cell differentiation	biological_process	9	CDC73;CDK6;CTR9;DLL1;HOXA9;HOXB8;ITPKB;LOC102157048;LOC111092487;MEIS1;MEIS2;NFKBIA;PAF1;PTK2B;WDR61;ZBTB16;ZFP36	17	13536	30	18107	0.991101	1
GO:0051721	protein phosphatase 2A binding	molecular_function	8	ANKLE2;ARPP19;BOD1;CTTNBP2NL;DAB2IP;FOXO1;IGBP1;PPME1;PTPA;SMG5;SMG7;SPHK1;STRN3;STRN4;STRN;TP53	16	13536	16	18107	0.00949137	0.458371
GO:0007029	endoplasmic reticulum organization	biological_process	5	ATL1;ATL2;ATL3;BNIP1;CASQ1;CAV2;COL4A3BP;DOPEY1;DOPEY2;JAGN1;IL17RE;LMAN1;LOC106557472;LOC610310;PEX5;TOR1B;VAPB;VMP1	16	13536	16	18107	0.00949137	0.458371
GO:0034399	nuclear periphery	cellular_component	12	AHCTF1;ATF4;CHRNA10;NUP98;EBNA1BP2;IPO4;TM9SF1;IPO5;KPNB1;MAPT;NUP107;NUP153;NUP93;PSIP1;RANBP6;TELO2;TNPO1;TNPO2	16	13536	16	18107	0.00949137	0.458371
GO:0030705	cytoskeleton-dependent intracellular transport	biological_process	6	KIF13A;KIF13B;KIF14;KIF16B;KIF1A;KIF1B;KIF1C;KIF26A;KIF26B;KIF3B;KIF5A;KIF5B;KIF5C;LOC100855783;LOC102151505;STARD9	16	13536	17	18107	0.0478619	0.92626
GO:0009060	aerobic respiration	biological_process	8	BLOC1S1;COX19;COX20;FXN;LOC111092250;LOC477944;LOC479815;LOC489515;LOC608455;MTFR1L;MTFR1;MTFR2;NDUFV1;PANK2;PMPCB;SIRT3	16	13536	17	18107	0.0478619	0.92626
GO:0004721	phosphoprotein phosphatase activity	molecular_function	8	AVIL;CTDSP2;CTDNEP1;CTDSPL2;DLG1;LOC111095875;PDXP;PPEF1;PPP1CA;PPP1R3E;PPP2CA;PPP2CB;PPP3CA;PPP3CC;PPP4C;PPP5C;PTPN11	16	13536	17	18107	0.0478619	0.92626
GO:0045931	positive regulation of mitotic cell cycle	biological_process	8	ABL1;ASNS;BIRC5;BRCA2;DUSP3;LOC490969;NKX3-1;PKN2;PRKCA;PTPN11;RPS6KB1;SHB;SPHK1;TAL1;USP22;USP2	16	13536	17	18107	0.0478619	0.92626
GO:0005671	Ada2/Gcn5/Ada3 transcription activator complex	cellular_component	9	DR1;HCFC1;KAT14;PET117;KAT2A;KAT2B;MAP3K7;MBIP;POLE3;POLE4;SGF29;TADA2A;TADA3;UBAP2L;WDR5B;WDR5;ZZZ3	16	13536	17	18107	0.0478619	0.92626
GO:0000777	condensed chromosome kinetochore	cellular_component	10	BIRC5;BUB3;CENPM;CHAMP1;CLASP2;DYNC1I1;HJURP;ITGB3BP;NUP133;PHF6;PPP1CC;SEH1L;SEPT7;SPC24;SPC25;SPOUT1	16	13536	17	18107	0.0478619	0.92626
GO:0004712	protein serine/threonine/tyrosine kinase activity	molecular_function	8	ACVR2B;AKT1;AURKA;AURKB;TRNAD-GUC;CLK4;DSTYK;DYRK1A;LOC102155336;LOC102156359;PRKACA;RPS6KA1;RPS6KA2;RPS6KB1;SGK1;TNK2;TTK	16	13536	17	18107	0.0478619	0.92626
GO:0045648	positive regulation of erythrocyte differentiation	biological_process	8	ACVR1B;ACVR2A;ANKRD54;ETS1;FOXO3;HIF1A;INHBA;INPP5D;ISG15;KDM1A;MAPK14;MED1;NCKAP1L;SMAP1;TAL1;ZNF16	16	13536	17	18107	0.0478619	0.92626
GO:0051233	spindle midzone	cellular_component	10	APP;ARL8A;ARL8B;AURKA;AURKB;TRNAD-GUC;CCDC69;CDC42;CDC6;CDCA8;CTDP1;GEM;KIF14;LOC102155336;PKP4;PLK1;UNC119	16	13536	17	18107	0.0478619	0.92626
GO:0060828	regulation of canonical Wnt signaling pathway	biological_process	10	AMER1;AMER2;ANKRD10;BTRC;CCNY;CDK14;CLDN12;CTNND2;EMD;FZD5;IFT20;LRP4;LRP5;MKS1;NRARP;PRKN;ZNF703	16	13536	17	18107	0.0478619	0.92626
GO:0016032	viral process	biological_process	5	BICD1;BIN1;LOC111091071;CUL5;DLG1;DYNC1I2;DYNLL1;EP300;ERCC2;KLC1;LOC102155597;LOC484356;NACA;SEH1L;SET;TNPO1;TP53	16	13536	17	18107	0.0478619	0.92626
GO:0048754	branching morphogenesis of an epithelial tube	biological_process	7	B4GALT1;BMP7;CLIC4;EGF;GLI2;HNF1B;MET;MKS1;MMP14;NKX3-1;NOTCH1;PAK1;PKD1;RASIP1;SLIT2;TIMELESS	16	13536	17	18107	0.0478619	0.92626
GO:0008137	NADH dehydrogenase (ubiquinone) activity	molecular_function	8	NDUFA10;NDUFA12;NDUFA7;NDUFA8;NDUFAF2;NDUFB4;NDUFB8;NDUFB9;NDUFC1;NDUFC2;NDUFS1;NDUFS3;NDUFS4;NDUFS7;NDUFV1;NDUFV2	16	13536	17	18107	0.0478619	0.92626
GO:0022604	regulation of cell morphogenesis	biological_process	8	CAMSAP1;CAPZB;EFNA5;FITM2;LOC476151;PDZD8;QRICH1;SH3D19;SPARC;STRIP1;WTIP;ZMYM2;ZMYM3;ZMYM4;ZMYM6;LOC111090138;ZRANB1	16	13536	17	18107	0.0478619	0.92626
GO:0043014	alpha-tubulin binding	molecular_function	7	ARL4C;ARL8B;B4GALT1;BBS4;DNAL1;FAM110C;FNTA;HDAC6;HSPH1;INO80;NDEL1;PACRG;SNCA;SPAST;TTLL7;WASHC1	16	13536	17	18107	0.0478619	0.92626
GO:0002040	sprouting angiogenesis	biological_process	11	ADGRA2;ANGPT1;CDH13;E2F7;E2F8;ESM1;JMJD6;LEF1;LOXL2;NOTCH1;OTULIN;PTK2B;RAMP2;SEMA3E;TEK;THBS1	16	13536	17	18107	0.0478619	0.92626
GO:0004175	endopeptidase activity	molecular_function	7	APH1A;CPNE1;RBM12;EIF4A1;SENP3;FAM76A;FAM76B;NCSTN;PAPPA;PSEN2;PSMD1;PSMD2;RCE1;SENP1;SENP2;SENP5;TMEM59;TRAPPC12	16	13536	17	18107	0.0478619	0.92626
GO:0010719	negative regulation of epithelial to mesenchymal transition	biological_process	12	DAB2IP;DACT3;EFNA1;FOXA2;HPN;LDLRAD4;MAD2L2;OVOL2;PBLD;PPP2CA;SDHAF2;SFRP1;SMAD7;STRAP;TRIM62;VASN	16	13536	17	18107	0.0478619	0.92626
GO:0071897	DNA biosynthetic process	biological_process	8	LIG1;LIG3;LIG4;MYBBP1A;POLA1;POLA2;POLB;POLD2;POLE2;POLE3;POLE4;POLG;POLK;POLL;POLQ;TK1	16	13536	18	18107	0.130256	0.92626
GO:0042254	ribosome biogenesis	biological_process	6	GNL1;GNL2;GNL3L;GNL3;GTPBP4;MRPL10;MRPL36;MTG1;NAF1;NOA1;NOP10;RPL34;RPLP0;RRN3;SETD4;SURF6	16	13536	18	18107	0.130256	0.92626
GO:0030507	spectrin binding	molecular_function	6	ADD2;ANK1;ANK2;ANK3;CAMSAP1;CAMSAP2;CAMSAP3;DCTN2;DMTN;DYNC1I1;EPB41L2;MYO7A;PTPRN;SLC26A5;SPTBN4;USH1C	16	13536	18	18107	0.130256	0.92626
GO:0007281	germ cell development	biological_process	6	ACVR1;AKT1;BAX;BCL2L1;BMP4;CELF4;DND1;MSH2;MTOR;PRDM1;RARA;RNF2;RPS6KB1;SMAD5;TIAL1;WDR81	16	13536	18	18107	0.130256	0.92626
GO:0031418	L-ascorbic acid binding	molecular_function	6	EGLN1;EGLN2;EGLN3;OGFOD1;OGFOD2;OGFOD3;P3H1;P3H2;P4HA1;P4HA2;P4HA3;P4HTM;PLOD1;PLOD2;PLOD3;TMLHE	16	13536	18	18107	0.130256	0.92626
GO:0031593	polyubiquitin modification-dependent protein binding	molecular_function	7	ABRAXAS1;ABRAXAS2;AGL;BABAM2;BAG6;BRCC3;DZIP3;EPS15;HDAC6;PSMD4;RAD18;RAD23A;RAD23B;TNIP2;UBQLN1;UBQLN4	16	13536	18	18107	0.130256	0.92626
GO:0033539	fatty acid beta-oxidation using acyl-CoA dehydrogenase	biological_process	11	ACAD11;ACAD8;ACAD9;ACADL;ACADM;ACADSB;ACADS;ACADVL;ACOX1;ACOX2;ACOX3;ETFA;ETFB;CLDND2;ETFDH;GCDH;IVD	16	13536	18	18107	0.130256	0.92626
GO:0008361	regulation of cell size	biological_process	6	CLN8;CREB1;IL7R;IQGAP3;KEL;LAMTOR4;MSN;RAC1;RAP1GAP2;RPTOR;SLC9A3R1;VAV1;VAV2;VAV3;WDTC1;XK	16	13536	18	18107	0.130256	0.92626
GO:0006631	fatty acid metabolic process	biological_process	9	ANGPTL3;ANKRD23;CRYL1;ECHDC2;ECHS1;GPAM;LOC490969;MECR;NDUFS6;PLA2G15;PPARA;PRKAR2B;SGPL1;SNCA;THEM4;TNXB	16	13536	18	18107	0.130256	0.92626
GO:0001786	phosphatidylserine binding	molecular_function	6	ANXA13;ANXA9;CPNE1;RBM12;FCHO2;GAS6;LOC102153142;LOC610874;MARCKS;MFGE8;OSBPL10;OSBPL5;OSBPL8;PLCD1;SYTL2;THBS1;TIMD4	16	13536	18	18107	0.130256	0.92626
GO:0034394	protein localization to cell surface	biological_process	7	ANGPT1;ARF6;CTNNB1;EMP2;FBLN5;FGF7;FLNA;MRAP2;PIGK;PTPRK;PTPRU;RIC3;USP4;VCL;WASHC1;WNT11	16	13536	18	18107	0.130256	0.92626
GO:0046835	carbohydrate phosphorylation	biological_process	8	GALK1;GALK2;GCK;GNPTG;HK1;HK2;NAGK;PFKFB1;PFKFB2;PFKFB3;PFKFB4;PFKM;POMK;RBKS;TKFC;XYLB	16	13536	18	18107	0.130256	0.92626
GO:0001968	fibronectin binding	molecular_function	5	CCDC80;CTSK;CTSS;FBLN1;FSTL3;HSD17B12;IGFBP3;IGFBP5;ITGAV;ITGB1;LRRC15;MYOC;SFRP2;SSC5D;THBS1;THBS4	16	13536	18	18107	0.130256	0.92626
GO:0045596	negative regulation of cell differentiation	biological_process	8	GDF11;HMGB3;HOPX;IAPP;ITGB1;KRAS;LOC102152878;LOC102154172;LOC106557713;MAPK1;RARG;RBPJ;SIX2;SKIL;SUZ12;WNT4	16	13536	18	18107	0.130256	0.92626
GO:0005791	rough endoplasmic reticulum	cellular_component	10	CA4;CDKAL1;FKRP;HGFAC;HM13;LOC111096661;MYOC;PSEN1;PTGDS;RANGRF;RPN1;SUCO;TMEM97;TRAM1L1;TRAM1;TRAM2	16	13536	19	18107	0.255124	0.92626
GO:0045930	negative regulation of mitotic cell cycle	biological_process	8	ABL1;ANGEL2;BRINP2;BTG3;CDKN1B;DLG1;GAS1;HECA;NKX3-1;NLE1;PTPN3;SCRIB;SLC9A3R1;SMAD3;TGFB1;TRIM35	16	13536	19	18107	0.255124	0.92626
GO:0048147	negative regulation of fibroblast proliferation	biological_process	6	B4GALT7;BAX;CDC73;DAB2IP;DACH1;EMD;IFI30;MED25;MORC3;NF1;NUPR1;PEX2;SFRP1;SOD2;TP53;TRIM32	16	13536	19	18107	0.255124	0.92626
GO:0045746	negative regulation of Notch signaling pathway	biological_process	10	BEND6;BMP7;DLL4;DLX2;EGFL7;GDPD5;HEY1;HIF1AN;MMP14;NEURL1;NFKBIA;NUMB;OVOL2;RITA1;SLC35C1;TCIM	16	13536	19	18107	0.255124	0.92626
GO:0080025	phosphatidylinositol-3,5-bisphosphate binding	molecular_function	9	CLVS1;COMMD1;KIF16B;LOC102153142;LOC102156469;LOC610874;MAPKAP1;PLEKHA5;SESTD1;SH3PXD2B;SNX14;SNX3;WDR45B;WDR45;WIPI1;WIPI2	16	13536	19	18107	0.255124	0.92626
GO:0007595	lactation	biological_process	10	ATP7B;CAV1;CCND1;CREB1;ERBB4;GHRHR;GPAT4;MIR8854;HIF1A;LOC442967;LOC490969;MED1;NEURL1;OXTR;PRLR;USF2;VDR	16	13536	19	18107	0.255124	0.92626
GO:0071158	positive regulation of cell cycle arrest	biological_process	9	BRCA1;CDK5R1;CRLF3;DAB2IP;FAP;FOXO4;GATA6;INSM1;MED25;PKD2;PRKACA;RGCC;RRP8;TP53;TP73;UHRF2	16	13536	19	18107	0.255124	0.92626
GO:0001205	transcriptional activator activity, RNA polymerase II distal enhancer sequence-specific DNA binding	molecular_function	7	ARID3B;BACH1;HCFC1;HOXB5;MEF2C;MEOX2;MIXL1;NFE2L1;NFE2L2;NFKB1;PBX3;RELA;REL;SPI1;TARDBP;ZEB2	16	13536	19	18107	0.255124	0.92626
GO:0060349	bone morphogenesis	biological_process	9	ACP5;CHSY1;CITED2;CYP26B1;DHRS3;GLG1;HAS2;IFT80;LRP5;LTF;MSX1;OSR2;PAPPA2;PAX1;RARG;RIPPLY1	16	13536	19	18107	0.255124	0.92626
GO:0017134	fibroblast growth factor binding	molecular_function	6	API5;CEP57;FGFBP1;FGFR1;FGFR2;FGFR3;FGFR4;FGFRL1;FIBP;GLG1;GPC1;KLB;KL;RPS2;S100A13;THBS1	16	13536	19	18107	0.255124	0.92626
GO:0034198	cellular response to amino acid starvation	biological_process	9	ATF3;ATF4;CDKN1A;DAP;DEPDC5;EIF2AK2;SULT6B1;EIF2AK3;MIOS;NPRL2;NPRL3;RNF152;RRAGB;RRAGC;SEH1L;WDR24;WDR59	16	13536	19	18107	0.255124	0.92626
GO:0002053	positive regulation of mesenchymal cell proliferation	biological_process	7	BMPR1A;CHRD;CTNNB1;FBXW4;FGFR1;FOXF1;FOXP1;FOXP2;IRS2;LRP5;PRRX1;SHOX2;SOX9;STAT4;TGFBR2;WNT2	16	13536	20	18107	0.404913	0.92626
GO:0008305	integrin complex	cellular_component	8	CTDSPL;ITGA9;ITGA11;ITGA5;ITGA6;ITGA7;ITGA8;ITGAM;ITGAX;ITGB1;ITGB3;ITGB4;ITGB5;ITGB6;LOC102153796;MYH9;P2RX5;ITGAE	16	13536	20	18107	0.404913	0.92626
GO:0050714	positive regulation of protein secretion	biological_process	8	ANKRD1;DNM1L;EP300;EXPH5;EZR;GOLPH3L;GOLPH3;IGF1;KCNN4;LOC475149;MYO18A;PPID;STXBP5L;SYTL4;TGFB2;TGFB3	16	13536	20	18107	0.404913	0.92626
GO:0043280	positive regulation of cysteine-type endopeptidase activity involved in apoptotic process	biological_process	13	ARL6IP5;BCAP31;BCL10;CYCS;CYR61;DAPK1;FIS1;CLDN15;HMGB1;MAP3K5;MAPK9;NKX3-1;PDCD5;PPM1F;REST;SIRT1;TNFSF10	16	13536	20	18107	0.404913	0.92626
GO:0051537	2 iron, 2 sulfur cluster binding	molecular_function	6	CIAPIN1;CISD2;CISD3;FDX1;FXN;GLRX2;ISCA1;ISCA2;ISCU;LOC102154780;LOC488248;NDUFV2;RAVER1;FDX1L;SDHB;UQCRFS1;XDH	16	13536	20	18107	0.404913	0.92626
GO:0005637	nuclear inner membrane	cellular_component	8	DPY19L1;DPY19L3;EMD;ERN1;FAM169A;GHRHR;ITPR1;LMNB1;LMNB2;NRM;PSEN2;SIRT1;SMAD1;SMAD3;TM7SF2;TMPO	16	13536	20	18107	0.404913	0.92626
GO:0006491	N-glycan processing	biological_process	10	EDEM1;EDEM2;EDEM3;FUT8;LOC480667;MAN1A1;MAN1A2;MAN1C1;MAN2A1;MAN2A2;MGAT4B;PRKCSH;ST8SIA2;ST8SIA3;ST8SIA4;USF3	16	13536	20	18107	0.404913	0.92626
GO:0046034	ATP metabolic process	biological_process	12	AK1;AK2;AK4;AK5;AMPD2;ATP1B1;ATP6V1A;ATP6V1B2;BAD;CTNS;LOC488636;MIR8810;MYH7;OLA1;SLC25A25;VCP	16	13536	20	18107	0.404913	0.92626
GO:0050829	defense response to Gram-negative bacterium	biological_process	8	APP;B2M;BPI;CHGA;HMGB2;IL22RA1;IL23A;LBP;OPTN;SERPINE1;SLC11A1;SSC5D;TLR4;TLR5;TNFRSF14;VIP	16	13536	20	18107	0.404913	0.92626
GO:0045429	positive regulation of nitric oxide biosynthetic process	biological_process	9	AKT1;ASS1;DDAH1;DDAH2;EGFR;ESR1;HSP90AA1;INSR;KLF4;LOC111091360;LOC609484;MAPK9;PKD2;SOD2;TICAM1;TLR4	16	13536	20	18107	0.404913	0.92626
GO:0031334	positive regulation of protein complex assembly	biological_process	7	AJUBA;FAF1;FNIP1;FNIP2;GSK3B;ICE1;LOC111091118;MPP7;PIH1D1;SLF1;SLF2;SPIDR;SUMO1;TAL1;TGFB1;VCP	16	13536	21	18107	0.556202	0.92626
GO:0048741	skeletal muscle fiber development	biological_process	11	ACTA1;ACTN1;BIN3;CAV2;DNER;FAM228B;HOMER1;KEL;KLHL40;MYORG;P2RX2;PPP3CA;RHOA;GPX1;RIPOR2;SELENON;XK	16	13536	21	18107	0.556202	0.92626
GO:0003950	NAD+ ADP-ribosyltransferase activity	molecular_function	7	PARP11;PARP12;PARP14;PARP15;PARP16;PARP1;PARP2;PARP3;PARP4;PARP6;PARP8;PARP9;TIPARP;TNKS2;TNKS;ZC3HAV1	16	13536	21	18107	0.556202	0.92626
GO:0043525	positive regulation of neuron apoptotic process	biological_process	11	ATF4;BAX;BBC3;BCL2L11;CASP9;CDK5;CTNNB1;DDIT3;EPHA7;FOXO3;MAP3K11;NF1;PAK3;TFAP2A;TFAP2B;TGFB2	16	13536	21	18107	0.556202	0.92626
GO:0015986	ATP synthesis coupled proton transport	biological_process	12	ATP5A1;ATP5B;ATP5D;ATP5G1;ATP5G2;ATP5G3;ATP5J;ATP5L;ATP5O;ATP6V0A1;ATP6V0A2;LOC100683871;LOC102155865;LOC106558651;LOC479901;TCIRG1	16	13536	22	18107	0.689882	0.92626
GO:0030534	adult behavior	biological_process	5	BBS1;BBS2;BBS4;CNTNAP2;MAFG;NLGN3;NR4A3;NRXN1;PCDH17;PTEN;SHANK1;SHANK2;SHANK3;SLC1A2;TPGS1;ZFHX2	16	13536	22	18107	0.689882	0.92626
GO:0009953	dorsal/ventral pattern formation	biological_process	8	ARL13B;DISP1;DUSP6;EDN1;EN1;FBXL15;GLI1;GLI3;HOXA11;HOXA2;HOXB2;IFT172;IFT52;LOC111095863;OVOL2;TBX20	16	13536	22	18107	0.689882	0.92626
GO:0042273	ribosomal large subunit biogenesis	biological_process	7	EBNA1BP2;HEATR3;LOC608703;MALSU1;NLE1;NOC2L;NOP16;ORAOV1;RPL14;RPL26;RRS1;SDAD1;WDR55;WDR74;YAE1D1;ZNF622	16	13536	23	18107	0.795933	0.972031
GO:0060048	cardiac muscle contraction	biological_process	9	ATP1A3;ATP1B1;CAMK2D;GAA;GRK2;MAP2K6;MTOR;MYH7;MYL4;PPP1R13L;SMAD5;SRSF1;TAZ;TCAP;TNNI3;VEGFB	16	13536	23	18107	0.795933	0.972031
GO:0033344	cholesterol efflux	biological_process	8	ABCA12;ABCA1;ABCA2;ABCA5;ABCA7;ABCG1;ABCG4;APOA1;APOB;APOC1;APOE;NPC1;NPC2;SCARB1;SOAT1;SOAT2	16	13536	23	18107	0.795933	0.972031
GO:0001541	ovarian follicle development	biological_process	8	BAX;BCL2L1;EIF2B2;EIF2B4;EIF2B5;FANCG;IMMP2L;INHBA;KIT;KMT2B;LFNG;SMAD4;SOD1;TAF4;UBE3A;VGF	16	13536	24	18107	0.872882	0.99779
GO:0016705	oxidoreductase activity, acting on paired donors, with incorporation or reduction of molecular oxygen	molecular_function	5	CYP1B1;CYP27A1;CYP27C1;CYP2R1;CYP39A1;CYP4A37;EGLN1;EGLN2;EGLN3;LOC100686469;LOC102152484;LOC484867;OGFOD2;OGFOD3;P3H1;TBXAS1	16	13536	24	18107	0.872882	0.99779
GO:0015459	potassium channel regulator activity	molecular_function	4	ABCC9;AMIGO1;ARPP19;DLG1;DPP10;DPP6;KCNAB1;KCNAB2;KCNE3;KCNIP1;KCNMB2;KCNMB4;SGK1;SGK3;SUMO1;YWHAE	16	13536	24	18107	0.872882	0.99779
GO:0007274	neuromuscular synaptic transmission	biological_process	8	CACNA1A;CHRNA4;CHRNA5;CHRNB1;CHRNB2;CHRNB4;DTNA;EGR3;ETV5;FCHSD1;FCHSD2;KIF1B;P2RX2;RAB3A;SLC5A7;STXBP1	16	13536	24	18107	0.872882	0.99779
GO:0045214	sarcomere organization	biological_process	9	ACTN1;ACTN2;CAPN3;CASQ1;CFL2;FHOD3;FOXP1;ITGB1;KRT19;LOC106558660;MYLK3;PRKAR1A;SIX4;SRF;TCAP;WDR1	16	13536	25	18107	0.92466	0.99779
GO:0022008	neurogenesis	biological_process	7	CEP120;CLN5;DCHS1;KIF3A;LEMD2;LLGL1;LLGL2;NKX6-1;NOM1;NUP133;PRDM16;RARB;SMARCE1;SPOCK1;WDR62;WDR81	16	13536	25	18107	0.92466	0.99779
GO:0086010	membrane depolarization during action potential	biological_process	7	CACNA1A;CACNA1B;CACNA1C;CACNA1D;CACNA1G;CATSPER3;LOC478773;NALCN;SCN3A;SCN5A;SCN7A;SCN8A;SCN9A;TPC3;TPCN1;TPCN2	16	13536	25	18107	0.92466	0.99779
GO:0048706	embryonic skeletal system development	biological_process	9	ACVR2A;COL1A1;HOXA9;HOXB9;HOXC4;HOXC6;KIAA1217;LOC106559228;MBTD1;MKS1;PBX1;SLC35D1;SP3;SULF1;SULF2;TAPT1;WNT11	16	13536	25	18107	0.92466	0.99779
GO:0030901	midbrain development	biological_process	10	CTNNB1;DLG5;EN1;FGFR1;KAT2A;KDM2B;LMX1A;LOC106557595;LRP6;MSX1;NDST1;SMAD1;SMAD9;TAL2;UCHL5;WLS	16	13536	26	18107	0.957319	1
GO:0042734	presynaptic membrane	cellular_component	8	CADPS2;CASK;ERC2;GABBR1;GRIK4;KCTD16;NPTN;LOC111093395;NRXN1;PI4K2A;PICK1;RIMS2;SCRIB;SYP;SYT1;SYT7;UNC13A	16	13536	27	18107	0.976792	1
GO:0045736	negative regulation of cyclin-dependent protein serine/threonine kinase activity	biological_process	13	CASP3;CDKN1A;CDKN1B;CDKN2A;FBXO7;HEXIM1;HHEX;KAT2B;LATS1;LATS2;MEN1;NR2F2;PLK1;TFAP4;TNFAIP3;WEE2	16	13536	29	18107	0.993843	1
GO:0007189	adenylate cyclase-activating G-protein coupled receptor signaling pathway	biological_process	11	ADCY2;ADCY4;ADCY6;ADCY7;ADORA2A;ADORA2B;CALCRL;GHRHR;GNA13;GNAQ;NPR3;PTGER2;PTGIR;PTH1R;PTHLH;UCN3	16	13536	30	18107	0.996978	1
GO:0005251	delayed rectifier potassium channel activity	molecular_function	12	KCNA1;KCNA3;KCNA5;KCNA6;KCNB1;KCNC4;KCND1;KCNF1;KCNG1;KCNG3;KCNQ1;KCNQ3;KCNQ4;KCNS3;LOC102156059;LOC106558987	16	13536	30	18107	0.996978	1
GO:0030332	cyclin binding	molecular_function	5	CDK12;CDK14;CLDN12;CDK2;CDK4;CDK5RAP3;CDK6;CDKN1A;CIZ1;CUL3;FBXO31;FBXW7;HAUS3;POLN;HDAC3;INSM1;PTCH1;USP2	16	13536	32	18107	0.99933	1
GO:0030870	Mre11 complex	cellular_component	11	LOC102151191;LOC102153058;LOC102153836;LOC102154125;LOC106557691;LOC106560206;CCDC34;LOC111095260;LOC111096315;LOC111096743;LOC111098412;LOC477937;MRE11;NBN;RAD50;TERF2IP;TERF2	16	13536	89	18107	1	1
GO:0018345	protein palmitoylation	biological_process	9	HHAT;ZDHHC12;ZDHHC14;ZDHHC15;ZDHHC16;ZDHHC17;ZDHHC18;ZDHHC1;ZDHHC20;ZDHHC22;ZDHHC23;ZDHHC3;ZDHHC5;ZDHHC6;ZDHHC8	15	13536	15	18107	0.0127001	0.529509
GO:0005665	DNA-directed RNA polymerase II, core complex	cellular_component	10	CHD6;POLR2A;POLR2B;POLR2C;POLR2D;POLR2E;POLR2F;POLR2G;POLR2H;POLR2I;POLR2J;POLR2K;POLR2L;CHID1;URI1;ZNF768	15	13536	15	18107	0.0127001	0.529509
GO:0034314	Arp2/3 complex-mediated actin nucleation	biological_process	13	ACTR2;ACTR3B;ACTR3;ARPC1A;ARPC1B;ARPC2;ARPC3;ARPC4;ARPC5L;ARPC5;IQGAP2;JMY;MAGEL2;TRIM27;WASHC1	15	13536	15	18107	0.0127001	0.529509
GO:0010569	regulation of double-strand break repair via homologous recombination	biological_process	12	CHEK1;FIGNL1;FIGNL2;FIGN;KDM1A;PPP4C;PPP4R2;RAD51AP1;RAD51;RPA2;RTEL1;SIRT6;SPIDR;TERF2IP;TEX15	15	13536	15	18107	0.0127001	0.529509
GO:0000920	cell separation after cytokinesis	biological_process	8	CEP55;CHMP1A;CHMP1B;CHMP2A;CHMP2B;CHMP4B;CHMP4C;CHMP5;CHMP6;CHMP7;KIF20A;MITD1;PDCD6IP;VPS4A;VPS4B	15	13536	15	18107	0.0127001	0.529509
GO:2000377	regulation of reactive oxygen species metabolic process	biological_process	6	ARF4;BCO2;BIRC2;COQ7;FOXM1;FOXO1;FOXO3;PARL;PDK3;PID1;PRCP;PRKN;RIPK1;STK17A;TUSC2	15	13536	15	18107	0.0127001	0.529509
GO:0070064	proline-rich region binding	molecular_function	5	ABI2;ABL1;APBB1;BAIAP2L1;BAIAP2;CCND1;CYLD;GAREM1;NEDD4;PFN1;PRPF40A;SH3D19;TCERG1;WBP4;YAP1	15	13536	15	18107	0.0127001	0.529509
GO:0071364	cellular response to epidermal growth factor stimulus	biological_process	8	AKT1;BAG4;DAB2IP;EEF1A1;GAREM1;INPP5K;IQGAP1;LOC102155289;MED1;PDPK1;PLCG1;SNAI2;SOX9;VIL1;ZPR1	15	13536	15	18107	0.0127001	0.529509
GO:0006383	transcription by RNA polymerase III	biological_process	11	GTF3C2;GTF3C6;POLR1C;POLR1D;LOC111092404;POLR2E;POLR2F;POLR2H;POLR2K;POLR2L;CHID1;POLR3A;POLR3B;POLR3C;POLR3D;POLR3F;TBP	15	13536	15	18107	0.0127001	0.529509
GO:0034719	SMN-Sm protein complex	cellular_component	9	DDX20;GEMIN2;GEMIN4;GEMIN5;GEMIN6;GEMIN7;GEMIN8;SNRPB;SNRPD1;SNRPD2;SNRPD3;SNRPE;SNRPF;SNRPG;STRAP	15	13536	15	18107	0.0127001	0.529509
GO:0048041	focal adhesion assembly	biological_process	9	ACTN1;ACTN2;AJUBA;ARHGAP6;ARHGEF7;FERMT2;LOC106558660;PIP5K1A;PTPRK;RCC2;RHOD;SORBS1;TAOK2;TMEM219;THY1;WHAMM	15	13536	15	18107	0.0127001	0.529509
GO:0045022	early endosome to late endosome transport	biological_process	7	AKTIP;ANKRD27;EMP2;FAM160A2;HOOK1;HOOK2;HOOK3;KIF16B;PIK3C3;RAB5A;RAB7A;RILP;SNF8;SNX16;WDR91	15	13536	15	18107	0.0127001	0.529509
GO:0006479	protein methylation	biological_process	6	ARMT1;BTG2;ETF1;GSPT1;HEMK1;METTL21A;N6AMT1;PCMT1;PCMTD1;PCMTD2;PRMT1;PRMT3;PRMT9;SNRPB;SNRPD3	15	13536	15	18107	0.0127001	0.529509
GO:0035269	protein O-linked mannosylation	biological_process	10	ALG5;B4GAT1;DPM1;DPM2;DPM3;FKRP;FKTN;ISPD;LARGE1;LARGE2;POMGNT2;MIR8806;POMT1;SDF2L1;SDF2;TMEM5	15	13536	15	18107	0.0127001	0.529509
GO:0030041	actin filament polymerization	biological_process	9	AIF1;ARHGAP6;ARPC4;COBLL1;COBL;CTTN;DIAPH1;GAS7;GSN;LOC102154209;HCLS1;MSRB1;RAC1;TTC17;VIL1;WAS	15	13536	15	18107	0.0127001	0.529509
GO:0045737	positive regulation of cyclin-dependent protein serine/threonine kinase activity	biological_process	13	CCNC;CCND1;CCND2;CCND3;CCNL2;CCNQ;CCNT1;CCNT2;CCNY;LOC111092016;LOC485730;MAPRE3;PDGFB;PROX1;PSMD10;PSRC1	15	13536	16	18107	0.0608308	0.92626
GO:0070372	regulation of ERK1 and ERK2 cascade	biological_process	11	APIP;CLCF1;CYR61;EPHA7;EPHB1;ERBB2;FAM83D;FN1;FRS2;NEK10;PKHD1;PTPN6;ROS1;RRAS;SYK	15	13536	16	18107	0.0608308	0.92626
GO:0071004	U2-type prespliceosome	cellular_component	10	LOC102153257;LSM7;LUC7L2;LUC7L3;LUC7L;PRPF39;PRPF40A;SF3A1;SF3A2;SF3B1;SNRNP70;SNRPC;SNRPG;SNRPN;SNURF;U2AF2	15	13536	16	18107	0.0608308	0.92626
GO:0018024	histone-lysine N-methyltransferase activity	molecular_function	10	ASH1L;ASH2L;EHMT2;EZH1;EZH2;LOC610615;MEN1;NSD1;NSD2;NSD3;SETD7;SETDB1;SETMAR;SMYD3;SUV39H2	15	13536	16	18107	0.0608308	0.92626
GO:0030295	protein kinase activator activity	molecular_function	6	CCNQ;DAXX;DBF4B;FGF13;GPRC5B;HMGB1;MAPK8IP2;NCKAP1L;NKX3-1;PIK3CA;PRKAG2;LOC106559811;RGCC;STK11;TOM1L1;WNT11	15	13536	16	18107	0.0608308	0.92626
GO:0048675	axon extension	biological_process	8	DCLK1;DVL1;FBRSL1;ITGB1;MAP1B;MAPT;NDN;PLXNB1;SEMA5B;SLC9A6;SPG11;ULK1;ULK2;USP9X;VCL	15	13536	16	18107	0.0608308	0.92626
GO:0048025	negative regulation of mRNA splicing, via spliceosome	biological_process	13	ACIN1;C1QBP;CELF4;DYRK1A;HNRNPA2B1;HNRNPK;PTBP1;RBM10;RBM42;SRSF10;SRSF4;SRSF6;SRSF7;SRSF9;U2AF2	15	13536	16	18107	0.0608308	0.92626
GO:0042542	response to hydrogen peroxide	biological_process	7	APTX;CAT;CRYAB;GLRX2;KPNA4;NR4A3;PPP1R15B;PPP2CB;PRKAA1;RHOA;GPX1;SOD1;SOD2;STK24;STK26;TRPA1	15	13536	16	18107	0.0608308	0.92626
GO:0030970	retrograde protein transport, ER to cytosol	biological_process	6	AUP1;DERL1;DERL2;ERLEC1;FAF2;HERPUD1;HSP90B1;NPLOC4;OS9;SEC61B;SEL1L;SELENOS;SYVN1;TMEM129;VCP	15	13536	16	18107	0.0608308	0.92626
GO:0001782	B cell homeostasis	biological_process	6	BAK1;BAX;BCL2L11;CASP3;GAPT;LYN;MEF2C;NCKAP1L;PKN1;PPP2R3C;RC3H1;RC3H2;SOS1;SPNS2;TNFRSF13C	15	13536	16	18107	0.0608308	0.92626
GO:0007162	negative regulation of cell adhesion	biological_process	5	ADAM10;ANGPT1;CBLL1;CDH13;DAB1;DSCAM;LOC102151415;LPXN;PDE3B;PLXNB1;PLXNB2;DENND6B;PLXNB3;PODXL;RND1;SEMA4D	15	13536	16	18107	0.0608308	0.92626
GO:0046718	viral entry into host cell	biological_process	7	ANPEP;CD55;CLEC5A;CTSB;DPP4;GRK2;HYAL2;ITGAV;NECTIN1;NPC1;SIVA1;UVRAG;VAMP8;VPS18;ZNF639	15	13536	16	18107	0.0608308	0.92626
GO:0090316	positive regulation of intracellular protein transport	biological_process	8	ASPH;B3GAT3;BCAS3;CEP131;CEP290;ICE1;KIF20B;OAZ2;PCM1;PCNT;PLK3;RAB29;RBM22;RUFY3;VAMP2	15	13536	16	18107	0.0608308	0.92626
GO:0002076	osteoblast development	biological_process	8	CLEC5A;GLI2;HDAC4;HOXA2;JUND;LIMD1;LOC102151229;LOC449531;LRP5;MEN1;MSX2;PTH1R;PTHLH;SATB2;SMAD3	15	13536	16	18107	0.0608308	0.92626
GO:0009314	response to radiation	biological_process	5	COL3A1;CXCL12;DCUN1D3;FANCG;JUNB;JUND;JUN;KIT;LOC111094296;MAP3K20;MBD4;MECP2;OGG1;PLK3;SMC1A	15	13536	16	18107	0.0608308	0.92626
GO:0031572	G2 DNA damage checkpoint	biological_process	10	ABRAXAS1;BABAM2;BRCC3;BRSK1;CDC14B;CHEK1;CLSPN;DTL;FZR1;MAPKAPK2;PLK1;RBBP8;TAOK1;TAOK2;TMEM219;UIMC1	15	13536	16	18107	0.0608308	0.92626
GO:0006891	intra-Golgi vesicle-mediated transport	biological_process	7	COG5;COG6;COG8;COPB2;COPE;COPG2;CUX1;SH2B2;GOSR1;GOSR2;NSF;RAB6A;RAB6B;TRAPPC10;VTI1A;VTI1B	15	13536	16	18107	0.0608308	0.92626
GO:2000114	regulation of establishment of cell polarity	biological_process	7	ARFGEF1;BCAS3;CDH5;GATA3;KANK1;KIF20B;PTK2B;RACK1;RICTOR;RNF41;ROCK1;ROCK2;RUFY3;SHTN1;WDPCP	15	13536	16	18107	0.0608308	0.92626
GO:0001702	gastrulation with mouth forming second	biological_process	9	ACVR1;ACVR2A;ACVR2B;AMOT;CHRD;CTNNB1;FRS2;LDB1;LRP5;PLPP3;RNF2;SMAD4;TENM4;UGDH;ZBTB17	15	13536	16	18107	0.0608308	0.92626
GO:0042073	intraciliary transport	biological_process	7	ARL3;BBS12;ICK;IFT20;IFT27;IFT46;IFT57;IFT74;IFT81;RABL2B;SSNA1;TRAF3IP1;TTC26;TTC30A;TTC30B	15	13536	16	18107	0.0608308	0.92626
GO:0051028	mRNA transport	biological_process	8	ALYREF;EIF5A;HNRNPA1;KIF5C;LOC100683228;LOC102152493;MAGOHB;MAGOH;NCBP2;NUP35;QKI;RBM8A;SLBP;SRSF1;SRSF7	15	13536	16	18107	0.0608308	0.92626
GO:0004003	ATP-dependent DNA helicase activity	molecular_function	11	BRIP1;DDX11;ERCC2;ERCC3;FBXO18;HELB;LOC477937;MCM4;MCM6;MCM7;NBN;RAD50;RTEL1;XRCC5;XRCC6	15	13536	17	18107	0.158098	0.92626
GO:0071577	zinc II ion transmembrane transport	biological_process	7	LOC100856617;SLC11A2;SLC30A10;SLC30A1;SLC30A2;SLC30A3;SLC30A4;SLC30A5;SLC30A6;SLC30A7;SLC30A8;SLC39A11;SLC39A13;SLC39A1;SLC39A3	15	13536	17	18107	0.158098	0.92626
GO:0043153	entrainment of circadian clock by photoperiod	biological_process	7	BHLHE40;CRY1;MTERF2;CRY2;FBXL3;LOC102152029;LOC610648;NR2F6;PER1;PML;PPP1CA;PPP1CB;PPP1CC;RBM4B;SIK1;USP2	15	13536	17	18107	0.158098	0.92626
GO:0043542	endothelial cell migration	biological_process	10	ADGRA2;CDH13;DPP4;FAP;GIPC1;LOXL2;NOS3;PAXIP1;PLXND1;PRKX;PTEN;PTK2;PTP4A3;S100A2;STARD13	15	13536	17	18107	0.158098	0.92626
GO:0097150	neuronal stem cell population maintenance	biological_process	10	ASPM;CDH2;DLL1;FOXO1;FOXO3;HOOK3;JAG1;MCPH1;MMP24;NOTCH1;PCM1;PROX1;PRRX1;SRRT;SS18	15	13536	17	18107	0.158098	0.92626
GO:0071108	protein K48-linked deubiquitination	biological_process	11	OTUB1;OTUB2;OTUD4;OTUD5;OTUD7B;TNFAIP3;USP19;USP20;USP33;USP34;USP37;USP5;USP8;VCPIP1;YOD1	15	13536	17	18107	0.158098	0.92626
GO:0006950	response to stress	biological_process	4	AHSA1;GADD45B;GADD45G;GLP1R;HSP90AA1;HSP90AB1;KBTBD4;LOC102156762;MAPK11;MAPKAPK2;MINK1;LOC111096071;NDRG4;SGK3;TRAP1;UCN3	15	13536	17	18107	0.158098	0.92626
GO:0005839	proteasome core complex	cellular_component	8	LOC102152203;PSMA1;PSMA2;PSMA5;PSMA7;PSMB10;PSMB1;PSMB2;PSMB3;PSMB4;PSMB5;PSMB6;GLTPD2;PSMB7;PSMB8;PSMB9	15	13536	17	18107	0.158098	0.92626
GO:0001895	retina homeostasis	biological_process	7	AIPL1;ALB;AZGP1;B2M;BBS1;CDH3;HSPB1;JCHAIN;LTF;LYZ;PIGR;POC1B;SOD1;SRPRB;WDR36	15	13536	17	18107	0.158098	0.92626
GO:0035774	positive regulation of insulin secretion involved in cellular response to glucose stimulus	biological_process	12	ANO1;ARRB1;BAD;C2CD2L;CFTR;GCG;GPR68;HIF1A;MPC2;PDX1;PPP3CB;RFX6;SRI;STX4;TMEM27	15	13536	17	18107	0.158098	0.92626
GO:0032757	positive regulation of interleukin-8 production	biological_process	8	DDIT3;DDX58;FADD;LBP;LOC102153861;MAVS;NOD2;PARK7;PRKD2;RIPK1;SERPINE1;TLR2;TLR3;TLR5;ZNF580	15	13536	17	18107	0.158098	0.92626
GO:0051298	centrosome duplication	biological_process	10	ARHGEF10;BRCA2;BRSK1;CEP192;FBXW5;LOC102152881;LOC111097612;TUBGCP6;NDE1;ROCK2;STIL;TUBGCP2;TUBGCP3;TUBGCP4;TUBGCP5;USP33	15	13536	17	18107	0.158098	0.92626
GO:0071353	cellular response to interleukin-4	biological_process	8	ALAD;CORO1A;FASN;GATA3;HSP90AB1;HSPA5;IMPDH2;KEAP1;LEF1;LOC102152029;LOC102156762;MRC1;NFIL3;PML;SHPK	15	13536	17	18107	0.158098	0.92626
GO:0005795	Golgi stack	cellular_component	11	BET1L;GALNT2;GOLGA7;LPCAT2;MARCH4;MARCH9;MBTPS1;MGAT2;NSF;PLK3;RAB27B;TRAPPC4;USO1;VRK1;ZFYVE1	15	13536	17	18107	0.158098	0.92626
GO:0032981	mitochondrial respiratory chain complex I assembly	biological_process	7	ACAD9;AIFM1;FOXRED1;LOC478911;NDUFAF3;NDUFAF4;NDUFAF5;NDUFAF6;NDUFC1;NDUFS4;NDUFS7;NUBPL;QPCT;NDUFAF7;TAZ;TIMM21	15	13536	17	18107	0.158098	0.92626
GO:0006607	NLS-bearing protein import into nucleus	biological_process	7	DAG1;IPO4;TM9SF1;IPO5;KPNA1;KPNA2;KPNA3;KPNA4;KPNA6;KPNB1;LOC474539;NUP35;NUP54;RANBP6;TNPO1;TNPO2	15	13536	17	18107	0.158098	0.92626
GO:0030515	snoRNA binding	molecular_function	7	DDX21;HEATR1;IMP3;LOC111091931;NOP56;NOP58;NUDT16;NUDT1;NUDT4;NUDT5;NUDT7;PWP2;TBL3;UTP6;WDR3	15	13536	17	18107	0.158098	0.92626
GO:0030316	osteoclast differentiation	biological_process	9	CSF1R;CSF1;CTNNB1;FARP2;GAB2;GLO1;GPC3;IREB2;JUNB;MAPK14;OSTM1;SNX10;TFRC;TNFSF11;TRAF6	15	13536	17	18107	0.158098	0.92626
GO:0004714	transmembrane receptor protein tyrosine kinase activity	molecular_function	9	ERBB2;ERBB4;FLT3;INSRR;INSR;KIT;LOC111094605;MET;MST1R;NPTN;LOC111093395;NTRK1;NTRK3;ROS1;RYK;TEK	15	13536	17	18107	0.158098	0.92626
GO:0001954	positive regulation of cell-matrix adhesion	biological_process	7	CCL25;CD36;CDH13;CDK6;CIB1;CSF1;DMD;EMP2;EPHA1;GSK3B;ITGB3;NINJ1;PTK2B;UTRN;VEGFC	15	13536	17	18107	0.158098	0.92626
GO:0000070	mitotic sister chromatid segregation	biological_process	8	BUB3;CDCA8;CEP57L1;CEP57;ESPL1;INO80;KIF18A;KIF18B;KLHL22;KNSTRN;MIS12;NEK2;PLK1;SPAG5;ZWINT	15	13536	17	18107	0.158098	0.92626
GO:0035904	aorta development	biological_process	10	ADAMTS6;AP2B1;DCTN5;DNM2;LOX;LRP2;LTBP1;MYH10;NDST1;PKD2;PLXND1;PRDM1;SMAD6;SNX17;SUFU	15	13536	17	18107	0.158098	0.92626
GO:0031307	integral component of mitochondrial outer membrane	cellular_component	15	ABCB6;ARMCX3;BAK1;BNIP3;DMPK;FIS1;CLDN15;FUNDC1;FUNDC2;GDAP1;MGARP;MUL1;RHOT1;TOMM20;TOMM22;TOMM7	15	13536	18	18107	0.29731	0.92626
GO:0030282	bone mineralization	biological_process	6	ALOX15;ASPN;AXIN2;CLEC3B;ERCC2;FBXL15;GPC3;KLF10;LGR4;MMP13;PHEX;PTH1R;SBDS;SBNO2;WNT11	15	13536	18	18107	0.29731	0.92626
GO:0006094	gluconeogenesis	biological_process	9	ATF3;ATF4;BPGM;CRY1;MTERF2;FBP1;G6PC2;G6PC3;GPD1;GPD2;GPI;PCK2;PC;PGAM1;RBP4;TPI1	15	13536	18	18107	0.29731	0.92626
GO:0035855	megakaryocyte development	biological_process	9	ABI1;EP300;FLI1;KIT;MED1;MEIS1;MPIG6B;PTPN11;PTPN6;SRF;TAL1;VPS33B;WASF2;ZFPM1;ZNF385A	15	13536	18	18107	0.29731	0.92626
GO:0060324	face development	biological_process	6	ALDH1A2;ALDH1A3;BBS4;BRAF;GRHL2;HOXB3;MAP2K1;MAP2K2;MAPK1;MKKS;LOC102153017;RAF1;RARA;RARG;SRF;ZFAND5	15	13536	18	18107	0.29731	0.92626
[truncated: 11,264 more rows]
